# Supplementary material
Source: PubMed Central journal article supplement (PMC9151349)

# THE LANCET

## Supplementary appendix

This appendix formed part of the original submission and has been peer reviewed. We post it as supplied by the authors.

Supplement to: Manning JE, Oliveira F, Countinho-Abreu IV, et al. Safety and immunogenicity of a mosquito saliva peptide-based vaccine: a randomised, placebo-controlled, double-blind, phase 1 trial. *Lancet* 2020; published online June 11. [https://doi.org/10.1016/S0140-6736\(20\)31048-5](https://doi.org/10.1016/S0140-6736(20)31048-5).

Supplemental Table 1: Structure and Physical Properties of the AGS-v peptides

|                                 | AGS-6 Acetate                                                                                                                                          | AGS-30 Acetate                                                                                                                                                                                     | AGS-31 Acetate                                                                                                                                                     | AGS-35 Acetate                                                                                                                                     |
|---------------------------------|--------------------------------------------------------------------------------------------------------------------------------------------------------|----------------------------------------------------------------------------------------------------------------------------------------------------------------------------------------------------|--------------------------------------------------------------------------------------------------------------------------------------------------------------------|----------------------------------------------------------------------------------------------------------------------------------------------------|
| Size (mer)                      | 33                                                                                                                                                     | 44                                                                                                                                                                                                 | 36                                                                                                                                                                 | 32                                                                                                                                                 |
| Molecular Formula               | C <sub>164</sub> H <sub>264</sub> N <sub>50</sub> O <sub>46</sub> S <sub>3</sub>                                                                       | C <sub>214</sub> H <sub>357</sub> N <sub>61</sub> O <sub>58</sub> S <sub>4</sub>                                                                                                                   | C <sub>182</sub> H <sub>305</sub> N <sub>61</sub> O <sub>54</sub>                                                                                                  | C <sub>154</sub> H <sub>243</sub> N <sub>41</sub> O <sub>54</sub> S <sub>4</sub>                                                                   |
| Molecular Mass                  | 3768.4 Da                                                                                                                                              | 4840.8 Da                                                                                                                                                                                          | 4211.8 Da                                                                                                                                                          | 3661.1 Da                                                                                                                                          |
| Amino Acid Sequence             | H-Lys-Gln-Asn-Asp-Tyr-Gln-Ala-Leu-Leu-Gly-Leu-Cys-Cys-Pro-Trp-Ile-Asp-Leu-Ala-Ala-Ala-Asp-Leu-Pro-Met-Arg-Arg-His-Ala-Lys-Ala-Arg-Glu-OH, acetate salt | H-Ala-Leu-Val-Leu-His-Ser-Met-Leu-Val-Asn-Ala-Ser-Leu-Ala-Glu-Met-Val-Lys-Glu-Ser-Tyr-Gln-Thr-His-Gly-Ala-Asp-Gly-Arg-Met-Val-Val-Arg-Met-Leu-Lys-Phe-Val-Arg-Leu-Leu-Pro-Gly-Ala-OH, acetate salt | H-Val-Gln-Arg-Val-Arg-Ala-Leu-Arg-Ala-Leu-Leu-Glu-Thr-Leu-Leu-Gln-His-Gln-Gly-Glu-Gln-Asn-Asn-Asp-Val-Tyr-Leu-Ile-Arg-Leu-Ala-His-Glu-Thr-Gly-Arg-OH, acetate salt | H-His-Asp-Gln-Tyr-Ser-Met-Glu-Cys-Leu-Glu-Ala-Ala-Glu-Pro-Lys-Tyr-Leu-Asp-Gly-Leu-Lys-Thr-Leu-Ala-Asp-Glu-Thr-Ala-Gln-Cys-Met-Arg-OH, acetate salt |
| Source Protein Name             | Salivary gland 7-like protein                                                                                                                          | Salivary gland 1-like protein                                                                                                                                                                      | Salivary gland 1-like protein                                                                                                                                      | gSG7 protein                                                                                                                                       |
| Source Protein Accession Number | AAL68786.1                                                                                                                                             | AAL68784.1                                                                                                                                                                                         | AAL68784.1                                                                                                                                                         | CAC35523.1                                                                                                                                         |

Supplemental Table 2. Adverse Events Summary

**Table 1 : Summary of Max Grade Adverse Events Per Subject**

| Event                                | Adjuvant + AGS-V (N = 17) |         |               |               |              |              | AGS-V (N = 16) |         |               |              |              |              | Placebo (N = 16) |         |              |              |               |         |
|--------------------------------------|---------------------------|---------|---------------|---------------|--------------|--------------|----------------|---------|---------------|--------------|--------------|--------------|------------------|---------|--------------|--------------|---------------|---------|
|                                      | No Sx                     | Grade 0 | Grade 1       | Grade 2       | Grade 3      | Grade 4      | No Sx          | Grade 0 | Grade 1       | Grade 2      | Grade 3      | Grade 4      | No Sx            | Grade 0 | Grade 1      | Grade 2      | Grade 3       | Grade 4 |
| Abdominal cramps                     | 17<br>(100%)              | 0 (0%)  | 0 (0%)        | 0 (0%)        | 0 (0%)       | 0 (0%)       | 15<br>(93.75%) | 0 (0%)  | 1<br>(6.25%)  | 0 (0%)       | 0 (0%)       | 0 (0%)       | 16<br>(100%)     | 0 (0%)  | 0 (0%)       | 0 (0%)       | 0 (0%)        | 0 (0%)  |
| Abdominal pain                       | 14<br>(82.35%)            | 0 (0%)  | 3<br>(17.65%) | 0 (0%)        | 0 (0%)       | 0 (0%)       | 14<br>(87.5%)  | 0 (0%)  | 2<br>(12.5%)  | 0 (0%)       | 0 (0%)       | 0 (0%)       | 15<br>(93.75%)   | 0 (0%)  | 1<br>(6.25%) | 0 (0%)       | 0 (0%)        | 0 (0%)  |
| Absolute neutrophil count, decreased | 15<br>(88.24%)            | 0 (0%)  | 2<br>(11.76%) | 0 (0%)        | 0 (0%)       | 0 (0%)       | 15<br>(93.75%) | 0 (0%)  | 0 (0%)        | 0 (0%)       | 1<br>(6.25%) | 0 (0%)       | 15<br>(93.75%)   | 0 (0%)  | 0 (0%)       | 0 (0%)       | 1<br>(6.25%)  | 0 (0%)  |
| Acute sinusitis                      | 17<br>(100%)              | 0 (0%)  | 0 (0%)        | 0 (0%)        | 0 (0%)       | 0 (0%)       | 16<br>(100%)   | 0 (0%)  | 0 (0%)        | 0 (0%)       | 0 (0%)       | 0 (0%)       | 15<br>(93.75%)   | 0 (0%)  | 1<br>(6.25%) | 0 (0%)       | 0 (0%)        | 0 (0%)  |
| ALT increased                        | 17<br>(100%)              | 0 (0%)  | 0 (0%)        | 0 (0%)        | 0 (0%)       | 0 (0%)       | 13<br>(81.25%) | 0 (0%)  | 3<br>(18.75%) | 0 (0%)       | 0 (0%)       | 0 (0%)       | 16<br>(100%)     | 0 (0%)  | 0 (0%)       | 0 (0%)       | 0 (0%)        | 0 (0%)  |
| Anxiety                              | 17<br>(100%)              | 0 (0%)  | 0 (0%)        | 0 (0%)        | 0 (0%)       | 0 (0%)       | 15<br>(93.75%) | 0 (0%)  | 1<br>(6.25%)  | 0 (0%)       | 0 (0%)       | 0 (0%)       | 16<br>(100%)     | 0 (0%)  | 0 (0%)       | 0 (0%)       | 0 (0%)        | 0 (0%)  |
| Arthralgia                           | 14<br>(82.35%)            | 0 (0%)  | 1<br>(5.88%)  | 2<br>(11.76%) | 0 (0%)       | 0 (0%)       | 15<br>(93.75%) | 0 (0%)  | 1<br>(6.25%)  | 0 (0%)       | 0 (0%)       | 0 (0%)       | 16<br>(100%)     | 0 (0%)  | 0 (0%)       | 0 (0%)       | 0 (0%)        | 0 (0%)  |
| AST increased                        | 15<br>(88.24%)            | 0 (0%)  | 2<br>(11.76%) | 0 (0%)        | 0 (0%)       | 0 (0%)       | 14<br>(87.5%)  | 0 (0%)  | 2<br>(12.5%)  | 0 (0%)       | 0 (0%)       | 0 (0%)       | 15<br>(93.75%)   | 0 (0%)  | 1<br>(6.25%) | 0 (0%)       | 0 (0%)        | 0 (0%)  |
| Bilirubin total high                 | 17<br>(100%)              | 0 (0%)  | 0 (0%)        | 0 (0%)        | 0 (0%)       | 0 (0%)       | 15<br>(93.75%) | 0 (0%)  | 1<br>(6.25%)  | 0 (0%)       | 0 (0%)       | 0 (0%)       | 16<br>(100%)     | 0 (0%)  | 0 (0%)       | 0 (0%)       | 0 (0%)        | 0 (0%)  |
| Blood eosinophils increased          | 17<br>(100%)              | 0 (0%)  | 0 (0%)        | 0 (0%)        | 0 (0%)       | 0 (0%)       | 15<br>(93.75%) | 0 (0%)  | 1<br>(6.25%)  | 0 (0%)       | 0 (0%)       | 0 (0%)       | 16<br>(100%)     | 0 (0%)  | 0 (0%)       | 0 (0%)       | 0 (0%)        | 0 (0%)  |
| Bradycardia                          | 16<br>(94.12%)            | 0 (0%)  | 0 (0%)        | 0 (0%)        | 1<br>(5.88%) | 0 (0%)       | 15<br>(93.75%) | 0 (0%)  | 1<br>(6.25%)  | 0 (0%)       | 0 (0%)       | 0 (0%)       | 16<br>(100%)     | 0 (0%)  | 0 (0%)       | 0 (0%)       | 0 (0%)        | 0 (0%)  |
| BUN increased                        | 15<br>(88.24%)            | 0 (0%)  | 1<br>(5.88%)  | 1<br>(5.88%)  | 0 (0%)       | 0 (0%)       | 16<br>(100%)   | 0 (0%)  | 0 (0%)        | 0 (0%)       | 0 (0%)       | 0 (0%)       | 15<br>(93.75%)   | 0 (0%)  | 1<br>(6.25%) | 0 (0%)       | 0 (0%)        | 0 (0%)  |
| Campylobacter                        | 17<br>(100%)              | 0 (0%)  | 0 (0%)        | 0 (0%)        | 0 (0%)       | 0 (0%)       | 16<br>(100%)   | 0 (0%)  | 0 (0%)        | 0 (0%)       | 0 (0%)       | 0 (0%)       | 15<br>(93.75%)   | 0 (0%)  | 1<br>(6.25%) | 0 (0%)       | 0 (0%)        | 0 (0%)  |
| Candida vaginitis                    | 17<br>(100%)              | 0 (0%)  | 0 (0%)        | 0 (0%)        | 0 (0%)       | 0 (0%)       | 16<br>(100%)   | 0 (0%)  | 0 (0%)        | 0 (0%)       | 0 (0%)       | 0 (0%)       | 14<br>(87.5%)    | 0 (0%)  | 2<br>(12.5%) | 0 (0%)       | 0 (0%)        | 0 (0%)  |
| Chills                               | 14<br>(82.35%)            | 0 (0%)  | 0 (0%)        | 3<br>(17.65%) | 0 (0%)       | 0 (0%)       | 14<br>(87.5%)  | 0 (0%)  | 2<br>(12.5%)  | 0 (0%)       | 0 (0%)       | 0 (0%)       | 15<br>(93.75%)   | 0 (0%)  | 1<br>(6.25%) | 0 (0%)       | 0 (0%)        | 0 (0%)  |
| Common cold                          | 16<br>(94.12%)            | 0 (0%)  | 1<br>(5.88%)  | 0 (0%)        | 0 (0%)       | 0 (0%)       | 16<br>(100%)   | 0 (0%)  | 0 (0%)        | 0 (0%)       | 0 (0%)       | 0 (0%)       | 15<br>(93.75%)   | 0 (0%)  | 1<br>(6.25%) | 0 (0%)       | 0 (0%)        | 0 (0%)  |
| Constipation                         | 17<br>(100%)              | 0 (0%)  | 0 (0%)        | 0 (0%)        | 0 (0%)       | 0 (0%)       | 16<br>(100%)   | 0 (0%)  | 0 (0%)        | 0 (0%)       | 0 (0%)       | 0 (0%)       | 15<br>(93.75%)   | 0 (0%)  | 1<br>(6.25%) | 0 (0%)       | 0 (0%)        | 0 (0%)  |
| Coryza                               | 15<br>(88.24%)            | 0 (0%)  | 1<br>(5.88%)  | 1<br>(5.88%)  | 0 (0%)       | 0 (0%)       | 16<br>(100%)   | 0 (0%)  | 0 (0%)        | 0 (0%)       | 0 (0%)       | 0 (0%)       | 15<br>(93.75%)   | 0 (0%)  | 1<br>(6.25%) | 0 (0%)       | 0 (0%)        | 0 (0%)  |
| CPK increased                        | 12<br>(70.59%)            | 0 (0%)  | 0 (0%)        | 3<br>(17.65%) | 1<br>(5.88%) | 1<br>(5.88%) | 14<br>(87.5%)  | 0 (0%)  | 0 (0%)        | 1<br>(6.25%) | 0 (0%)       | 1<br>(6.25%) | 10<br>(62.5%)    | 0 (0%)  | 1<br>(6.25%) | 2<br>(12.5%) | 3<br>(18.75%) | 0 (0%)  |

| Event                     | Adjuvant + AGS-V (N = 17) |         |             |            |           |         | AGS-V (N = 16) |         |             |           |           |         | Placebo (N = 16) |         |             |           |           |         |
|---------------------------|---------------------------|---------|-------------|------------|-----------|---------|----------------|---------|-------------|-----------|-----------|---------|------------------|---------|-------------|-----------|-----------|---------|
|                           | No Sx                     | Grade 0 | Grade 1     | Grade 2    | Grade 3   | Grade 4 | No Sx          | Grade 0 | Grade 1     | Grade 2   | Grade 3   | Grade 4 | No Sx            | Grade 0 | Grade 1     | Grade 2   | Grade 3   | Grade 4 |
| Creatine kinase           | 17 (100%)                 | 0 (0%)  | 0 (0%)      | 0 (0%)     | 0 (0%)    | 0 (0%)  | 16 (100%)      | 0 (0%)  | 0 (0%)      | 0 (0%)    | 0 (0%)    | 0 (0%)  | 15 (93.75%)      | 0 (0%)  | 0 (0%)      | 1 (6.25%) | 0 (0%)    | 0 (0%)  |
| Creatine kinase high      | 16 (94.12%)               | 0 (0%)  | 0 (0%)      | 1 (5.88%)  | 0 (0%)    | 0 (0%)  | 15 (93.75%)    | 0 (0%)  | 0 (0%)      | 1 (6.25%) | 0 (0%)    | 0 (0%)  | 15 (93.75%)      | 0 (0%)  | 0 (0%)      | 0 (0%)    | 1 (6.25%) | 0 (0%)  |
| Creatinine increased      | 16 (94.12%)               | 0 (0%)  | 1 (5.88%)   | 0 (0%)     | 0 (0%)    | 0 (0%)  | 16 (100%)      | 0 (0%)  | 0 (0%)      | 0 (0%)    | 0 (0%)    | 0 (0%)  | 16 (100%)        | 0 (0%)  | 0 (0%)      | 0 (0%)    | 0 (0%)    | 0 (0%)  |
| Dermatitis                | 16 (94.12%)               | 0 (0%)  | 0 (0%)      | 0 (0%)     | 1 (5.88%) | 0 (0%)  | 16 (100%)      | 0 (0%)  | 0 (0%)      | 0 (0%)    | 0 (0%)    | 0 (0%)  | 16 (100%)        | 0 (0%)  | 0 (0%)      | 0 (0%)    | 0 (0%)    | 0 (0%)  |
| Diaphoresis               | 15 (88.24%)               | 0 (0%)  | 1 (5.88%)   | 1 (5.88%)  | 0 (0%)    | 0 (0%)  | 14 (87.5%)     | 0 (0%)  | 2 (12.5%)   | 0 (0%)    | 0 (0%)    | 0 (0%)  | 15 (93.75%)      | 0 (0%)  | 1 (6.25%)   | 0 (0%)    | 0 (0%)    | 0 (0%)  |
| Diarrhea                  | 15 (88.24%)               | 0 (0%)  | 1 (5.88%)   | 1 (5.88%)  | 0 (0%)    | 0 (0%)  | 16 (100%)      | 0 (0%)  | 0 (0%)      | 0 (0%)    | 0 (0%)    | 0 (0%)  | 15 (93.75%)      | 0 (0%)  | 1 (6.25%)   | 0 (0%)    | 0 (0%)    | 0 (0%)  |
| Difficulty sleeping       | 16 (94.12%)               | 0 (0%)  | 1 (5.88%)   | 0 (0%)     | 0 (0%)    | 0 (0%)  | 16 (100%)      | 0 (0%)  | 0 (0%)      | 0 (0%)    | 0 (0%)    | 0 (0%)  | 16 (100%)        | 0 (0%)  | 0 (0%)      | 0 (0%)    | 0 (0%)    | 0 (0%)  |
| Dry cough                 | 15 (88.24%)               | 0 (0%)  | 2 (11.76%)  | 0 (0%)     | 0 (0%)    | 0 (0%)  | 16 (100%)      | 0 (0%)  | 0 (0%)      | 0 (0%)    | 0 (0%)    | 0 (0%)  | 16 (100%)        | 0 (0%)  | 0 (0%)      | 0 (0%)    | 0 (0%)    | 0 (0%)  |
| Eczema                    | 16 (94.12%)               | 0 (0%)  | 1 (5.88%)   | 0 (0%)     | 0 (0%)    | 0 (0%)  | 16 (100%)      | 0 (0%)  | 0 (0%)      | 0 (0%)    | 0 (0%)    | 0 (0%)  | 16 (100%)        | 0 (0%)  | 0 (0%)      | 0 (0%)    | 0 (0%)    | 0 (0%)  |
| Elevated liver enzymes    | 16 (94.12%)               | 0 (0%)  | 1 (5.88%)   | 0 (0%)     | 0 (0%)    | 0 (0%)  | 16 (100%)      | 0 (0%)  | 0 (0%)      | 0 (0%)    | 0 (0%)    | 0 (0%)  | 16 (100%)        | 0 (0%)  | 0 (0%)      | 0 (0%)    | 0 (0%)    | 0 (0%)  |
| Elevated serum creatinine | 16 (94.12%)               | 0 (0%)  | 1 (5.88%)   | 0 (0%)     | 0 (0%)    | 0 (0%)  | 16 (100%)      | 0 (0%)  | 0 (0%)      | 0 (0%)    | 0 (0%)    | 0 (0%)  | 16 (100%)        | 0 (0%)  | 0 (0%)      | 0 (0%)    | 0 (0%)    | 0 (0%)  |
| Eosinophilia              | 17 (100%)                 | 0 (0%)  | 0 (0%)      | 0 (0%)     | 0 (0%)    | 0 (0%)  | 15 (93.75%)    | 0 (0%)  | 1 (6.25%)   | 0 (0%)    | 0 (0%)    | 0 (0%)  | 16 (100%)        | 0 (0%)  | 0 (0%)      | 0 (0%)    | 0 (0%)    | 0 (0%)  |
| Erythema                  | 2 (11.76%)                | 0 (0%)  | 14 (82.35%) | 1 (5.88%)  | 0 (0%)    | 0 (0%)  | 1 (6.25%)      | 0 (0%)  | 15 (93.75%) | 0 (0%)    | 0 (0%)    | 0 (0%)  | 1 (6.25%)        | 0 (0%)  | 15 (93.75%) | 0 (0%)    | 0 (0%)    | 0 (0%)  |
| Eyelid Stye               | 17 (100%)                 | 0 (0%)  | 0 (0%)      | 0 (0%)     | 0 (0%)    | 0 (0%)  | 15 (93.75%)    | 0 (0%)  | 1 (6.25%)   | 0 (0%)    | 0 (0%)    | 0 (0%)  | 16 (100%)        | 0 (0%)  | 0 (0%)      | 0 (0%)    | 0 (0%)    | 0 (0%)  |
| Fatigue                   | 9 (52.94%)                | 0 (0%)  | 5 (29.41%)  | 3 (17.65%) | 0 (0%)    | 0 (0%)  | 11 (68.75%)    | 0 (0%)  | 5 (31.25%)  | 0 (0%)    | 0 (0%)    | 0 (0%)  | 12 (75%)         | 0 (0%)  | 3 (18.75%)  | 1 (6.25%) | 0 (0%)    | 0 (0%)  |
| Fever                     | 16 (94.12%)               | 0 (0%)  | 0 (0%)      | 1 (5.88%)  | 0 (0%)    | 0 (0%)  | 16 (100%)      | 0 (0%)  | 0 (0%)      | 0 (0%)    | 0 (0%)    | 0 (0%)  | 14 (87.5%)       | 0 (0%)  | 2 (12.5%)   | 0 (0%)    | 0 (0%)    | 0 (0%)  |
| Feverish                  | 10 (58.82%)               | 0 (0%)  | 4 (23.53%)  | 3 (17.65%) | 0 (0%)    | 0 (0%)  | 15 (93.75%)    | 0 (0%)  | 1 (6.25%)   | 0 (0%)    | 0 (0%)    | 0 (0%)  | 13 (81.25%)      | 0 (0%)  | 3 (18.75%)  | 0 (0%)    | 0 (0%)    | 0 (0%)  |
| Gastritis                 | 17 (100%)                 | 0 (0%)  | 0 (0%)      | 0 (0%)     | 0 (0%)    | 0 (0%)  | 16 (100%)      | 0 (0%)  | 0 (0%)      | 0 (0%)    | 0 (0%)    | 0 (0%)  | 15 (93.75%)      | 0 (0%)  | 1 (6.25%)   | 0 (0%)    | 0 (0%)    | 0 (0%)  |
| Headache                  | 9 (52.94%)                | 0 (0%)  | 4 (23.53%)  | 4 (23.53%) | 0 (0%)    | 0 (0%)  | 9 (56.25%)     | 0 (0%)  | 5 (31.25%)  | 2 (12.5%) | 0 (0%)    | 0 (0%)  | 12 (75%)         | 0 (0%)  | 4 (25%)     | 0 (0%)    | 0 (0%)    | 0 (0%)  |
| Hematuria                 | 16 (94.12%)               | 0 (0%)  | 1 (5.88%)   | 0 (0%)     | 0 (0%)    | 0 (0%)  | 13 (81.25%)    | 0 (0%)  | 1 (6.25%)   | 0 (0%)    | 2 (12.5%) | 0 (0%)  | 13 (81.25%)      | 0 (0%)  | 1 (6.25%)   | 2 (12.5%) | 0 (0%)    | 0 (0%)  |
| Hemoglobin decreased      | 10 (58.82%)               | 0 (0%)  | 6 (35.29%)  | 1 (5.88%)  | 0 (0%)    | 0 (0%)  | 8 (50%)        | 0 (0%)  | 4 (25%)     | 4 (25%)   | 0 (0%)    | 0 (0%)  | 11 (68.75%)      | 0 (0%)  | 4 (25%)     | 1 (6.25%) | 0 (0%)    | 0 (0%)  |

| Event                     | Adjuvant + AGS-V (N = 17) |           |             |            |            |         | AGS-V (N = 16) |           |             |            |           |         | Placebo (N = 16) |           |             |           |           |         |
|---------------------------|---------------------------|-----------|-------------|------------|------------|---------|----------------|-----------|-------------|------------|-----------|---------|------------------|-----------|-------------|-----------|-----------|---------|
|                           | No Sx                     | Grade 0   | Grade 1     | Grade 2    | Grade 3    | Grade 4 | No Sx          | Grade 0   | Grade 1     | Grade 2    | Grade 3   | Grade 4 | No Sx            | Grade 0   | Grade 1     | Grade 2   | Grade 3   | Grade 4 |
| Hyperglycemia             | 16 (94.12%)               | 0 (0%)    | 0 (0%)      | 1 (5.88%)  | 0 (0%)     | 0 (0%)  | 14 (87.5%)     | 0 (0%)    | 0 (0%)      | 2 (12.5%)  | 0 (0%)    | 0 (0%)  | 14 (87.5%)       | 0 (0%)    | 0 (0%)      | 2 (12.5%) | 0 (0%)    | 0 (0%)  |
| Hypertremia               | 14 (82.35%)               | 0 (0%)    | 2 (11.76%)  | 1 (5.88%)  | 0 (0%)     | 0 (0%)  | 12 (75%)       | 0 (0%)    | 3 (18.75%)  | 0 (0%)     | 1 (6.25%) | 0 (0%)  | 13 (81.25%)      | 0 (0%)    | 2 (12.5%)   | 1 (6.25%) | 0 (0%)    | 0 (0%)  |
| Hypertension              | 16 (94.12%)               | 0 (0%)    | 1 (5.88%)   | 0 (0%)     | 0 (0%)     | 0 (0%)  | 16 (100%)      | 0 (0%)    | 0 (0%)      | 0 (0%)     | 0 (0%)    | 0 (0%)  | 16 (100%)        | 0 (0%)    | 0 (0%)      | 0 (0%)    | 0 (0%)    | 0 (0%)  |
| Hypocalcemia              | 16 (94.12%)               | 0 (0%)    | 1 (5.88%)   | 0 (0%)     | 0 (0%)     | 0 (0%)  | 15 (93.75%)    | 0 (0%)    | 1 (6.25%)   | 0 (0%)     | 0 (0%)    | 0 (0%)  | 16 (100%)        | 0 (0%)    | 0 (0%)      | 0 (0%)    | 0 (0%)    | 0 (0%)  |
| Hypoglycemia              | 14 (82.35%)               | 0 (0%)    | 1 (5.88%)   | 0 (0%)     | 2 (11.76%) | 0 (0%)  | 14 (87.5%)     | 0 (0%)    | 2 (12.5%)   | 0 (0%)     | 0 (0%)    | 0 (0%)  | 13 (81.25%)      | 0 (0%)    | 1 (6.25%)   | 1 (6.25%) | 1 (6.25%) | 0 (0%)  |
| Hypokalemia               | 15 (88.24%)               | 0 (0%)    | 1 (5.88%)   | 1 (5.88%)  | 0 (0%)     | 0 (0%)  | 14 (87.5%)     | 0 (0%)    | 1 (6.25%)   | 1 (6.25%)  | 0 (0%)    | 0 (0%)  | 13 (81.25%)      | 0 (0%)    | 1 (6.25%)   | 1 (6.25%) | 1 (6.25%) | 0 (0%)  |
| Hyponatremia              | 16 (94.12%)               | 0 (0%)    | 1 (5.88%)   | 0 (0%)     | 0 (0%)     | 0 (0%)  | 16 (100%)      | 0 (0%)    | 0 (0%)      | 0 (0%)     | 0 (0%)    | 0 (0%)  | 16 (100%)        | 0 (0%)    | 0 (0%)      | 0 (0%)    | 0 (0%)    | 0 (0%)  |
| Hypophosphatemia          | 16 (94.12%)               | 0 (0%)    | 0 (0%)      | 1 (5.88%)  | 0 (0%)     | 0 (0%)  | 12 (75%)       | 0 (0%)    | 1 (6.25%)   | 3 (18.75%) | 0 (0%)    | 0 (0%)  | 14 (87.5%)       | 0 (0%)    | 1 (6.25%)   | 1 (6.25%) | 0 (0%)    | 0 (0%)  |
| Influenza                 | 16 (94.12%)               | 0 (0%)    | 0 (0%)      | 1 (5.88%)  | 0 (0%)     | 0 (0%)  | 16 (100%)      | 0 (0%)    | 0 (0%)      | 0 (0%)     | 0 (0%)    | 0 (0%)  | 16 (100%)        | 0 (0%)    | 0 (0%)      | 0 (0%)    | 0 (0%)    | 0 (0%)  |
| Injection site erythema   | 9 (52.94%)                | 1 (5.88%) | 3 (17.65%)  | 3 (17.65%) | 1 (5.88%)  | 0 (0%)  | 13 (81.25%)    | 2 (12.5%) | 1 (6.25%)   | 0 (0%)     | 0 (0%)    | 0 (0%)  | 14 (87.5%)       | 1 (6.25%) | 1 (6.25%)   | 0 (0%)    | 0 (0%)    | 0 (0%)  |
| Injection site induration | 15 (88.24%)               | 1 (5.88%) | 1 (5.88%)   | 0 (0%)     | 0 (0%)     | 0 (0%)  | 16 (100%)      | 0 (0%)    | 0 (0%)      | 0 (0%)     | 0 (0%)    | 0 (0%)  | 16 (100%)        | 0 (0%)    | 0 (0%)      | 0 (0%)    | 0 (0%)    | 0 (0%)  |
| Injection site itching    | 10 (58.82%)               | 0 (0%)    | 6 (35.29%)  | 0 (0%)     | 1 (5.88%)  | 0 (0%)  | 15 (93.75%)    | 0 (0%)    | 1 (6.25%)   | 0 (0%)     | 0 (0%)    | 0 (0%)  | 16 (100%)        | 0 (0%)    | 0 (0%)      | 0 (0%)    | 0 (0%)    | 0 (0%)  |
| Injection site pain       | 8 (47.06%)                | 0 (0%)    | 7 (41.18%)  | 2 (11.76%) | 0 (0%)     | 0 (0%)  | 10 (62.5%)     | 0 (0%)    | 6 (37.5%)   | 0 (0%)     | 0 (0%)    | 0 (0%)  | 12 (75%)         | 0 (0%)    | 3 (18.75%)  | 1 (6.25%) | 0 (0%)    | 0 (0%)  |
| Injection site pruritus   | 17 (100%)                 | 0 (0%)    | 0 (0%)      | 0 (0%)     | 0 (0%)     | 0 (0%)  | 14 (87.5%)     | 0 (0%)    | 2 (12.5%)   | 0 (0%)     | 0 (0%)    | 0 (0%)  | 16 (100%)        | 0 (0%)    | 0 (0%)      | 0 (0%)    | 0 (0%)    | 0 (0%)  |
| Injection site swelling   | 8 (47.06%)                | 1 (5.88%) | 7 (41.18%)  | 1 (5.88%)  | 0 (0%)     | 0 (0%)  | 14 (87.5%)     | 2 (12.5%) | 0 (0%)      | 0 (0%)     | 0 (0%)    | 0 (0%)  | 15 (93.75%)      | 1 (6.25%) | 0 (0%)      | 0 (0%)    | 0 (0%)    | 0 (0%)  |
| Injury                    | 17 (100%)                 | 0 (0%)    | 0 (0%)      | 0 (0%)     | 0 (0%)     | 0 (0%)  | 15 (93.75%)    | 0 (0%)    | 1 (6.25%)   | 0 (0%)     | 0 (0%)    | 0 (0%)  | 16 (100%)        | 0 (0%)    | 0 (0%)      | 0 (0%)    | 0 (0%)    | 0 (0%)  |
| Insect bite               | 17 (100%)                 | 0 (0%)    | 0 (0%)      | 0 (0%)     | 0 (0%)     | 0 (0%)  | 16 (100%)      | 0 (0%)    | 0 (0%)      | 0 (0%)     | 0 (0%)    | 0 (0%)  | 15 (93.75%)      | 0 (0%)    | 1 (6.25%)   | 0 (0%)    | 0 (0%)    | 0 (0%)  |
| Iron deficiency anemia    | 17 (100%)                 | 0 (0%)    | 0 (0%)      | 0 (0%)     | 0 (0%)     | 0 (0%)  | 15 (93.75%)    | 0 (0%)    | 0 (0%)      | 1 (6.25%)  | 0 (0%)    | 0 (0%)  | 16 (100%)        | 0 (0%)    | 0 (0%)      | 0 (0%)    | 0 (0%)    | 0 (0%)  |
| Knee pain                 | 16 (94.12%)               | 0 (0%)    | 1 (5.88%)   | 0 (0%)     | 0 (0%)     | 0 (0%)  | 16 (100%)      | 0 (0%)    | 0 (0%)      | 0 (0%)     | 0 (0%)    | 0 (0%)  | 16 (100%)        | 0 (0%)    | 0 (0%)      | 0 (0%)    | 0 (0%)    | 0 (0%)  |
| Laryngitis                | 17 (100%)                 | 0 (0%)    | 0 (0%)      | 0 (0%)     | 0 (0%)     | 0 (0%)  | 16 (100%)      | 0 (0%)    | 0 (0%)      | 0 (0%)     | 0 (0%)    | 0 (0%)  | 15 (93.75%)      | 0 (0%)    | 1 (6.25%)   | 0 (0%)    | 0 (0%)    | 0 (0%)  |
| Local swelling            | 1 (5.88%)                 | 0 (0%)    | 16 (94.12%) | 0 (0%)     | 0 (0%)     | 0 (0%)  | 1 (6.25%)      | 0 (0%)    | 15 (93.75%) | 0 (0%)     | 0 (0%)    | 0 (0%)  | 1 (6.25%)        | 0 (0%)    | 15 (93.75%) | 0 (0%)    | 0 (0%)    | 0 (0%)  |

| Event                      | Adjuvant + AGS-V (N = 17) |         |            |           |           |         | AGS-V (N = 16) |         |            |           |         |         | Placebo (N = 16) |         |           |           |           |         |
|----------------------------|---------------------------|---------|------------|-----------|-----------|---------|----------------|---------|------------|-----------|---------|---------|------------------|---------|-----------|-----------|-----------|---------|
|                            | No Sx                     | Grade 0 | Grade 1    | Grade 2   | Grade 3   | Grade 4 | No Sx          | Grade 0 | Grade 1    | Grade 2   | Grade 3 | Grade 4 | No Sx            | Grade 0 | Grade 1   | Grade 2   | Grade 3   | Grade 4 |
| Lymph node tenderness      | 16 (94.12%)               | 0 (0%)  | 1 (5.88%)  | 0 (0%)    | 0 (0%)    | 0 (0%)  | 16 (100%)      | 0 (0%)  | 0 (0%)     | 0 (0%)    | 0 (0%)  | 0 (0%)  | 16 (100%)        | 0 (0%)  | 0 (0%)    | 0 (0%)    | 0 (0%)    | 0 (0%)  |
| Lymphocyte count increased | 16 (94.12%)               | 0 (0%)  | 1 (5.88%)  | 0 (0%)    | 0 (0%)    | 0 (0%)  | 16 (100%)      | 0 (0%)  | 0 (0%)     | 0 (0%)    | 0 (0%)  | 0 (0%)  | 16 (100%)        | 0 (0%)  | 0 (0%)    | 0 (0%)    | 0 (0%)    | 0 (0%)  |
| Muscle ache                | 15 (88.24%)               | 0 (0%)  | 2 (11.76%) | 0 (0%)    | 0 (0%)    | 0 (0%)  | 16 (100%)      | 0 (0%)  | 0 (0%)     | 0 (0%)    | 0 (0%)  | 0 (0%)  | 16 (100%)        | 0 (0%)  | 0 (0%)    | 0 (0%)    | 0 (0%)    | 0 (0%)  |
| Muscle strain              | 16 (94.12%)               | 0 (0%)  | 1 (5.88%)  | 0 (0%)    | 0 (0%)    | 0 (0%)  | 16 (100%)      | 0 (0%)  | 0 (0%)     | 0 (0%)    | 0 (0%)  | 0 (0%)  | 16 (100%)        | 0 (0%)  | 0 (0%)    | 0 (0%)    | 0 (0%)    | 0 (0%)  |
| Myalgia                    | 12 (70.59%)               | 0 (0%)  | 4 (23.53%) | 1 (5.88%) | 0 (0%)    | 0 (0%)  | 13 (81.25%)    | 0 (0%)  | 2 (12.5%)  | 1 (6.25%) | 0 (0%)  | 0 (0%)  | 11 (68.75%)      | 0 (0%)  | 4 (25%)   | 1 (6.25%) | 0 (0%)    | 0 (0%)  |
| Nasal congestion           | 15 (88.24%)               | 0 (0%)  | 2 (11.76%) | 0 (0%)    | 0 (0%)    | 0 (0%)  | 15 (93.75%)    | 0 (0%)  | 1 (6.25%)  | 0 (0%)    | 0 (0%)  | 0 (0%)  | 15 (93.75%)      | 0 (0%)  | 1 (6.25%) | 0 (0%)    | 0 (0%)    | 0 (0%)  |
| Nausea                     | 15 (88.24%)               | 0 (0%)  | 2 (11.76%) | 0 (0%)    | 0 (0%)    | 0 (0%)  | 13 (81.25%)    | 0 (0%)  | 2 (12.5%)  | 1 (6.25%) | 0 (0%)  | 0 (0%)  | 14 (87.5%)       | 0 (0%)  | 2 (12.5%) | 0 (0%)    | 0 (0%)    | 0 (0%)  |
| Neutrophil count decreased | 16 (94.12%)               | 0 (0%)  | 1 (5.88%)  | 0 (0%)    | 0 (0%)    | 0 (0%)  | 12 (75%)       | 0 (0%)  | 3 (18.75%) | 1 (6.25%) | 0 (0%)  | 0 (0%)  | 13 (81.25%)      | 0 (0%)  | 2 (12.5%) | 1 (6.25%) | 0 (0%)    | 0 (0%)  |
| Oral pain                  | 16 (94.12%)               | 0 (0%)  | 0 (0%)     | 1 (5.88%) | 0 (0%)    | 0 (0%)  | 16 (100%)      | 0 (0%)  | 0 (0%)     | 0 (0%)    | 0 (0%)  | 0 (0%)  | 16 (100%)        | 0 (0%)  | 0 (0%)    | 0 (0%)    | 0 (0%)    | 0 (0%)  |
| Peripheral neuropathy      | 17 (100%)                 | 0 (0%)  | 0 (0%)     | 0 (0%)    | 0 (0%)    | 0 (0%)  | 16 (100%)      | 0 (0%)  | 0 (0%)     | 0 (0%)    | 0 (0%)  | 0 (0%)  | 15 (93.75%)      | 0 (0%)  | 1 (6.25%) | 0 (0%)    | 0 (0%)    | 0 (0%)  |
| Productive cough           | 16 (94.12%)               | 0 (0%)  | 1 (5.88%)  | 0 (0%)    | 0 (0%)    | 0 (0%)  | 16 (100%)      | 0 (0%)  | 0 (0%)     | 0 (0%)    | 0 (0%)  | 0 (0%)  | 16 (100%)        | 0 (0%)  | 0 (0%)    | 0 (0%)    | 0 (0%)    | 0 (0%)  |
| Pruritic rash              | 15 (88.24%)               | 0 (0%)  | 0 (0%)     | 1 (5.88%) | 1 (5.88%) | 0 (0%)  | 15 (93.75%)    | 0 (0%)  | 1 (6.25%)  | 0 (0%)    | 0 (0%)  | 0 (0%)  | 16 (100%)        | 0 (0%)  | 0 (0%)    | 0 (0%)    | 0 (0%)    | 0 (0%)  |
| Pruritus                   | 16 (94.12%)               | 0 (0%)  | 1 (5.88%)  | 0 (0%)    | 0 (0%)    | 0 (0%)  | 16 (100%)      | 0 (0%)  | 0 (0%)     | 0 (0%)    | 0 (0%)  | 0 (0%)  | 16 (100%)        | 0 (0%)  | 0 (0%)    | 0 (0%)    | 0 (0%)    | 0 (0%)  |
| Rash                       | 17 (100%)                 | 0 (0%)  | 0 (0%)     | 0 (0%)    | 0 (0%)    | 0 (0%)  | 16 (100%)      | 0 (0%)  | 0 (0%)     | 0 (0%)    | 0 (0%)  | 0 (0%)  | 13 (81.25%)      | 0 (0%)  | 2 (12.5%) | 0 (0%)    | 1 (6.25%) | 0 (0%)  |
| Rhinorrhea                 | 16 (94.12%)               | 0 (0%)  | 1 (5.88%)  | 0 (0%)    | 0 (0%)    | 0 (0%)  | 16 (100%)      | 0 (0%)  | 0 (0%)     | 0 (0%)    | 0 (0%)  | 0 (0%)  | 15 (93.75%)      | 0 (0%)  | 1 (6.25%) | 0 (0%)    | 0 (0%)    | 0 (0%)  |
| Sinusitis                  | 16 (94.12%)               | 0 (0%)  | 0 (0%)     | 1 (5.88%) | 0 (0%)    | 0 (0%)  | 16 (100%)      | 0 (0%)  | 0 (0%)     | 0 (0%)    | 0 (0%)  | 0 (0%)  | 16 (100%)        | 0 (0%)  | 0 (0%)    | 0 (0%)    | 0 (0%)    | 0 (0%)  |
| Skin hyperpigmentation     | 16 (94.12%)               | 0 (0%)  | 1 (5.88%)  | 0 (0%)    | 0 (0%)    | 0 (0%)  | 15 (93.75%)    | 0 (0%)  | 1 (6.25%)  | 0 (0%)    | 0 (0%)  | 0 (0%)  | 16 (100%)        | 0 (0%)  | 0 (0%)    | 0 (0%)    | 0 (0%)    | 0 (0%)  |
| Skin induration            | 16 (94.12%)               | 0 (0%)  | 1 (5.88%)  | 0 (0%)    | 0 (0%)    | 0 (0%)  | 16 (100%)      | 0 (0%)  | 0 (0%)     | 0 (0%)    | 0 (0%)  | 0 (0%)  | 16 (100%)        | 0 (0%)  | 0 (0%)    | 0 (0%)    | 0 (0%)    | 0 (0%)  |
| Sore throat                | 15 (88.24%)               | 0 (0%)  | 1 (5.88%)  | 1 (5.88%) | 0 (0%)    | 0 (0%)  | 15 (93.75%)    | 0 (0%)  | 0 (0%)     | 1 (6.25%) | 0 (0%)  | 0 (0%)  | 15 (93.75%)      | 0 (0%)  | 1 (6.25%) | 0 (0%)    | 0 (0%)    | 0 (0%)  |
| Systolic hypertension      | 17 (100%)                 | 0 (0%)  | 0 (0%)     | 0 (0%)    | 0 (0%)    | 0 (0%)  | 15 (93.75%)    | 0 (0%)  | 1 (6.25%)  | 0 (0%)    | 0 (0%)  | 0 (0%)  | 16 (100%)        | 0 (0%)  | 0 (0%)    | 0 (0%)    | 0 (0%)    | 0 (0%)  |
| Tenderness                 | 16 (94.12%)               | 0 (0%)  | 1 (5.88%)  | 0 (0%)    | 0 (0%)    | 0 (0%)  | 16 (100%)      | 0 (0%)  | 0 (0%)     | 0 (0%)    | 0 (0%)  | 0 (0%)  | 16 (100%)        | 0 (0%)  | 0 (0%)    | 0 (0%)    | 0 (0%)    | 0 (0%)  |

| Event                             | Adjuvant + AGS-V (N = 17) |         |           |           |           |         | AGS-V (N = 16) |         |           |           |           |         | Placebo (N = 16) |         |           |           |           |         |
|-----------------------------------|---------------------------|---------|-----------|-----------|-----------|---------|----------------|---------|-----------|-----------|-----------|---------|------------------|---------|-----------|-----------|-----------|---------|
|                                   | No Sx                     | Grade 0 | Grade 1   | Grade 2   | Grade 3   | Grade 4 | No Sx          | Grade 0 | Grade 1   | Grade 2   | Grade 3   | Grade 4 | No Sx            | Grade 0 | Grade 1   | Grade 2   | Grade 3   | Grade 4 |
| Tooth extraction                  | 16 (94.12%)               | 0 (0%)  | 0 (0%)    | 1 (5.88%) | 0 (0%)    | 0 (0%)  | 16 (100%)      | 0 (0%)  | 0 (0%)    | 0 (0%)    | 0 (0%)    | 0 (0%)  | 16 (100%)        | 0 (0%)  | 0 (0%)    | 0 (0%)    | 0 (0%)    | 0 (0%)  |
| Torn bicep tendon                 | 16 (94.12%)               | 0 (0%)  | 0 (0%)    | 0 (0%)    | 1 (5.88%) | 0 (0%)  | 16 (100%)      | 0 (0%)  | 0 (0%)    | 0 (0%)    | 0 (0%)    | 0 (0%)  | 16 (100%)        | 0 (0%)  | 0 (0%)    | 0 (0%)    | 0 (0%)    | 0 (0%)  |
| Upper respiratory tract infection | 17 (100%)                 | 0 (0%)  | 0 (0%)    | 0 (0%)    | 0 (0%)    | 0 (0%)  | 15 (93.75%)    | 0 (0%)  | 1 (6.25%) | 0 (0%)    | 0 (0%)    | 0 (0%)  | 16 (100%)        | 0 (0%)  | 0 (0%)    | 0 (0%)    | 0 (0%)    | 0 (0%)  |
| Urinary frequency                 | 17 (100%)                 | 0 (0%)  | 0 (0%)    | 0 (0%)    | 0 (0%)    | 0 (0%)  | 16 (100%)      | 0 (0%)  | 0 (0%)    | 0 (0%)    | 0 (0%)    | 0 (0%)  | 15 (93.75%)      | 0 (0%)  | 1 (6.25%) | 0 (0%)    | 0 (0%)    | 0 (0%)  |
| Urinary tract infection           | 17 (100%)                 | 0 (0%)  | 0 (0%)    | 0 (0%)    | 0 (0%)    | 0 (0%)  | 15 (93.75%)    | 0 (0%)  | 0 (0%)    | 0 (0%)    | 1 (6.25%) | 0 (0%)  | 15 (93.75%)      | 0 (0%)  | 0 (0%)    | 0 (0%)    | 1 (6.25%) | 0 (0%)  |
| Urine WBC increased               | 17 (100%)                 | 0 (0%)  | 0 (0%)    | 0 (0%)    | 0 (0%)    | 0 (0%)  | 14 (87.5%)     | 0 (0%)  | 2 (12.5%) | 0 (0%)    | 0 (0%)    | 0 (0%)  | 16 (100%)        | 0 (0%)  | 0 (0%)    | 0 (0%)    | 0 (0%)    | 0 (0%)  |
| Urticaria                         | 16 (94.12%)               | 0 (0%)  | 0 (0%)    | 0 (0%)    | 1 (5.88%) | 0 (0%)  | 16 (100%)      | 0 (0%)  | 0 (0%)    | 0 (0%)    | 0 (0%)    | 0 (0%)  | 16 (100%)        | 0 (0%)  | 0 (0%)    | 0 (0%)    | 0 (0%)    | 0 (0%)  |
| Vertigo                           | 17 (100%)                 | 0 (0%)  | 0 (0%)    | 0 (0%)    | 0 (0%)    | 0 (0%)  | 16 (100%)      | 0 (0%)  | 0 (0%)    | 0 (0%)    | 0 (0%)    | 0 (0%)  | 15 (93.75%)      | 0 (0%)  | 0 (0%)    | 0 (0%)    | 1 (6.25%) | 0 (0%)  |
| Vitamin D deficiency              | 16 (94.12%)               | 0 (0%)  | 1 (5.88%) | 0 (0%)    | 0 (0%)    | 0 (0%)  | 16 (100%)      | 0 (0%)  | 0 (0%)    | 0 (0%)    | 0 (0%)    | 0 (0%)  | 16 (100%)        | 0 (0%)  | 0 (0%)    | 0 (0%)    | 0 (0%)    | 0 (0%)  |
| Vomiting                          | 17 (100%)                 | 0 (0%)  | 0 (0%)    | 0 (0%)    | 0 (0%)    | 0 (0%)  | 14 (87.5%)     | 0 (0%)  | 1 (6.25%) | 1 (6.25%) | 0 (0%)    | 0 (0%)  | 16 (100%)        | 0 (0%)  | 0 (0%)    | 0 (0%)    | 0 (0%)    | 0 (0%)  |
| WBC decreased                     | 17 (100%)                 | 0 (0%)  | 0 (0%)    | 0 (0%)    | 0 (0%)    | 0 (0%)  | 16 (100%)      | 0 (0%)  | 0 (0%)    | 0 (0%)    | 0 (0%)    | 0 (0%)  | 14 (87.5%)       | 0 (0%)  | 1 (6.25%) | 1 (6.25%) | 0 (0%)    | 0 (0%)  |
| WBC increased                     | 16 (94.12%)               | 0 (0%)  | 1 (5.88%) | 0 (0%)    | 0 (0%)    | 0 (0%)  | 14 (87.5%)     | 0 (0%)  | 2 (12.5%) | 0 (0%)    | 0 (0%)    | 0 (0%)  | 15 (93.75%)      | 0 (0%)  | 1 (6.25%) | 0 (0%)    | 0 (0%)    | 0 (0%)  |

**Table 2 : Counts of Adverse Events by Treatment Group**

|                                                                    | Adjuvant + AGS-V (N = 17) | AGS-V (N = 16)     | Placebo (N = 16)  |
|--------------------------------------------------------------------|---------------------------|--------------------|-------------------|
| Number of Subjects with one or more AE (percent)                   | 17 (100%)                 | 16 (100%)          | 15 (93.8%)        |
| Mean Number of AEs (SD, SE)                                        | 14.82 (8.81, 2.14)        | 11.38 (6.51, 1.63) | 9.81 (6.25, 1.56) |
| Median Number of AEs (IQR)                                         | 13 (10)                   | 10 (11.25)         | 10 (9.5)          |
| Min, Max Number of AEs                                             | 4, 33                     | 2, 21              | 0, 22             |
| Number of Subjects with one or more AE Grade 3 or Higher (percent) | 7 (41%)                   | 6 (38%)            | 7 (44%)           |
| Mean Number of AEs Grade 3 or Higher                               | 0.65 (0.93, 0.23)         | 0.44 (0.63, 0.16)  | 0.63 (0.89, 0.22) |

**Table 3 : Occurrence of Grade 0 Events by Treatment Group****Note : In Tables 3-7, multiple occurrences of the same event type with different grades are included in the respective table**

| <b>Event</b>                         | <b>Adjuvant + AGS-V (N = 17)</b> | <b>AGS-V (N = 16)</b> | <b>Placebo (N = 16)</b> |
|--------------------------------------|----------------------------------|-----------------------|-------------------------|
| Abdominal cramps                     | 0 (0%)                           | 0 (0%)                | 0 (0%)                  |
| Abdominal pain                       | 0 (0%)                           | 0 (0%)                | 0 (0%)                  |
| Absolute neutrophil count, decreased | 0 (0%)                           | 0 (0%)                | 0 (0%)                  |
| Acute sinusitis                      | 0 (0%)                           | 0 (0%)                | 0 (0%)                  |
| ALT increased                        | 0 (0%)                           | 0 (0%)                | 0 (0%)                  |
| Anxiety                              | 0 (0%)                           | 0 (0%)                | 0 (0%)                  |
| Arthralgia                           | 0 (0%)                           | 0 (0%)                | 0 (0%)                  |
| AST increased                        | 0 (0%)                           | 0 (0%)                | 0 (0%)                  |
| Bilirubin total high                 | 0 (0%)                           | 0 (0%)                | 0 (0%)                  |
| Blood eosinophils increased          | 0 (0%)                           | 0 (0%)                | 0 (0%)                  |
| Bradycardia                          | 0 (0%)                           | 0 (0%)                | 0 (0%)                  |
| BUN increased                        | 0 (0%)                           | 0 (0%)                | 0 (0%)                  |
| Campylobacter                        | 0 (0%)                           | 0 (0%)                | 0 (0%)                  |
| Candida vaginitis                    | 0 (0%)                           | 0 (0%)                | 0 (0%)                  |
| Chills                               | 0 (0%)                           | 0 (0%)                | 0 (0%)                  |
| Common cold                          | 0 (0%)                           | 0 (0%)                | 0 (0%)                  |
| Constipation                         | 0 (0%)                           | 0 (0%)                | 0 (0%)                  |
| Coryza                               | 0 (0%)                           | 0 (0%)                | 0 (0%)                  |
| CPK increased                        | 0 (0%)                           | 0 (0%)                | 0 (0%)                  |
| Creatine kinase                      | 0 (0%)                           | 0 (0%)                | 0 (0%)                  |
| Creatine kinase high                 | 0 (0%)                           | 0 (0%)                | 0 (0%)                  |
| Creatinine increased                 | 0 (0%)                           | 0 (0%)                | 0 (0%)                  |



| <b>Event</b>              | <b>Adjuvant + AGS-V (N = 17)</b> | <b>AGS-V (N = 16)</b> | <b>Placebo (N = 16)</b> |
|---------------------------|----------------------------------|-----------------------|-------------------------|
| Dermatitis                | 0 (0%)                           | 0 (0%)                | 0 (0%)                  |
| Diaphoresis               | 0 (0%)                           | 0 (0%)                | 0 (0%)                  |
| Diarrhea                  | 0 (0%)                           | 0 (0%)                | 0 (0%)                  |
| Difficulty sleeping       | 0 (0%)                           | 0 (0%)                | 0 (0%)                  |
| Dry cough                 | 0 (0%)                           | 0 (0%)                | 0 (0%)                  |
| Eczema                    | 0 (0%)                           | 0 (0%)                | 0 (0%)                  |
| Elevated liver enzymes    | 0 (0%)                           | 0 (0%)                | 0 (0%)                  |
| Elevated serum creatinine | 0 (0%)                           | 0 (0%)                | 0 (0%)                  |
| Eosinophilia              | 0 (0%)                           | 0 (0%)                | 0 (0%)                  |
| Erythema                  | 0 (0%)                           | 0 (0%)                | 0 (0%)                  |
| Eyelid Stye               | 0 (0%)                           | 0 (0%)                | 0 (0%)                  |
| Fatigue                   | 0 (0%)                           | 0 (0%)                | 0 (0%)                  |
| Fever                     | 0 (0%)                           | 0 (0%)                | 0 (0%)                  |
| Feverish                  | 0 (0%)                           | 0 (0%)                | 0 (0%)                  |
| Gastritis                 | 0 (0%)                           | 0 (0%)                | 0 (0%)                  |
| Headache                  | 0 (0%)                           | 0 (0%)                | 0 (0%)                  |
| Hematuria                 | 0 (0%)                           | 0 (0%)                | 0 (0%)                  |
| Hemoglobin decreased      | 0 (0%)                           | 0 (0%)                | 0 (0%)                  |
| Hyperglycemia             | 0 (0%)                           | 0 (0%)                | 0 (0%)                  |
| Hypernatremia             | 0 (0%)                           | 0 (0%)                | 0 (0%)                  |
| Hypertension              | 0 (0%)                           | 0 (0%)                | 0 (0%)                  |
| Hypocalcemia              | 0 (0%)                           | 0 (0%)                | 0 (0%)                  |
| Hypoglycemia              | 0 (0%)                           | 0 (0%)                | 0 (0%)                  |
| Hypokalemia               | 0 (0%)                           | 0 (0%)                | 0 (0%)                  |
| Hyponatremia              | 0 (0%)                           | 0 (0%)                | 0 (0%)                  |
| Hypophosphatemia          | 0 (0%)                           | 0 (0%)                | 0 (0%)                  |

| <b>Event</b>               | <b>Adjuvant + AGS-V (N = 17)</b> | <b>AGS-V (N = 16)</b> | <b>Placebo (N = 16)</b> |
|----------------------------|----------------------------------|-----------------------|-------------------------|
| Influenza                  | 0 (0%)                           | 0 (0%)                | 0 (0%)                  |
| Injection site erythema    | 3 (17.65%)                       | 3 (18.75%)            | 1 (6.25%)               |
| Injection site induration  | 1 (5.88%)                        | 0 (0%)                | 0 (0%)                  |
| Injection site itching     | 0 (0%)                           | 0 (0%)                | 0 (0%)                  |
| Injection site pain        | 0 (0%)                           | 0 (0%)                | 0 (0%)                  |
| Injection site pruritus    | 0 (0%)                           | 0 (0%)                | 0 (0%)                  |
| Injection site swelling    | 2 (11.76%)                       | 2 (12.5%)             | 1 (6.25%)               |
| Injury                     | 0 (0%)                           | 0 (0%)                | 0 (0%)                  |
| Insect bite                | 0 (0%)                           | 0 (0%)                | 0 (0%)                  |
| Iron deficiency anemia     | 0 (0%)                           | 0 (0%)                | 0 (0%)                  |
| Knee pain                  | 0 (0%)                           | 0 (0%)                | 0 (0%)                  |
| Laryngitis                 | 0 (0%)                           | 0 (0%)                | 0 (0%)                  |
| Local swelling             | 0 (0%)                           | 0 (0%)                | 0 (0%)                  |
| Lymph node tenderness      | 0 (0%)                           | 0 (0%)                | 0 (0%)                  |
| Lymphocyte count increased | 0 (0%)                           | 0 (0%)                | 0 (0%)                  |
| Muscle ache                | 0 (0%)                           | 0 (0%)                | 0 (0%)                  |
| Muscle strain              | 0 (0%)                           | 0 (0%)                | 0 (0%)                  |
| Myalgia                    | 0 (0%)                           | 0 (0%)                | 0 (0%)                  |
| Nasal congestion           | 0 (0%)                           | 0 (0%)                | 0 (0%)                  |
| Nausea                     | 0 (0%)                           | 0 (0%)                | 0 (0%)                  |
| Neutrophil count decreased | 0 (0%)                           | 0 (0%)                | 0 (0%)                  |
| Oral pain                  | 0 (0%)                           | 0 (0%)                | 0 (0%)                  |
| Peripheral neuropathy      | 0 (0%)                           | 0 (0%)                | 0 (0%)                  |
| Productive cough           | 0 (0%)                           | 0 (0%)                | 0 (0%)                  |
| Pruritic rash              | 0 (0%)                           | 0 (0%)                | 0 (0%)                  |
| Pruritus                   | 0 (0%)                           | 0 (0%)                | 0 (0%)                  |

| <b>Event</b>                      | <b>Adjuvant + AGS-V (N = 17)</b> | <b>AGS-V (N = 16)</b> | <b>Placebo (N = 16)</b> |
|-----------------------------------|----------------------------------|-----------------------|-------------------------|
| Rash                              | 0 (0%)                           | 0 (0%)                | 0 (0%)                  |
| Rhinorrhea                        | 0 (0%)                           | 0 (0%)                | 0 (0%)                  |
| Sinusitis                         | 0 (0%)                           | 0 (0%)                | 0 (0%)                  |
| Skin hyperpigmentation            | 0 (0%)                           | 0 (0%)                | 0 (0%)                  |
| Skin induration                   | 0 (0%)                           | 0 (0%)                | 0 (0%)                  |
| Sore throat                       | 0 (0%)                           | 0 (0%)                | 0 (0%)                  |
| Systolic hypertension             | 0 (0%)                           | 0 (0%)                | 0 (0%)                  |
| Tenderness                        | 0 (0%)                           | 0 (0%)                | 0 (0%)                  |
| Tooth extraction                  | 0 (0%)                           | 0 (0%)                | 0 (0%)                  |
| Torn bicep tendon                 | 0 (0%)                           | 0 (0%)                | 0 (0%)                  |
| Upper respiratory tract infection | 0 (0%)                           | 0 (0%)                | 0 (0%)                  |
| Urinary frequency                 | 0 (0%)                           | 0 (0%)                | 0 (0%)                  |
| Urinary tract infection           | 0 (0%)                           | 0 (0%)                | 0 (0%)                  |
| Urine WBC increased               | 0 (0%)                           | 0 (0%)                | 0 (0%)                  |
| Urticaria                         | 0 (0%)                           | 0 (0%)                | 0 (0%)                  |
| Vertigo                           | 0 (0%)                           | 0 (0%)                | 0 (0%)                  |
| Vitamin D deficiency              | 0 (0%)                           | 0 (0%)                | 0 (0%)                  |
| Vomiting                          | 0 (0%)                           | 0 (0%)                | 0 (0%)                  |
| WBC decreased                     | 0 (0%)                           | 0 (0%)                | 0 (0%)                  |
| WBC increased                     | 0 (0%)                           | 0 (0%)                | 0 (0%)                  |

**Table 4 : Occurrence of Grade 1 Events by Treatment Group**

| <b>Event</b>                         | <b>Adjuvant + AGS-V (N = 17)</b> | <b>AGS-V (N = 16)</b> | <b>Placebo (N = 16)</b> |
|--------------------------------------|----------------------------------|-----------------------|-------------------------|
| Abdominal cramps                     | 0 (0%)                           | 1 (6.25%)             | 0 (0%)                  |
| Abdominal pain                       | 3 (17.65%)                       | 2 (12.5%)             | 1 (6.25%)               |
| Absolute neutrophil count, decreased | 2 (11.76%)                       | 1 (6.25%)             | 1 (6.25%)               |
| Acute sinusitis                      | 0 (0%)                           | 0 (0%)                | 1 (6.25%)               |

| <b>Event</b>                | <b>Adjuvant + AGS-V (N = 17)</b> | <b>AGS-V (N = 16)</b> | <b>Placebo (N = 16)</b> |
|-----------------------------|----------------------------------|-----------------------|-------------------------|
| ALT increased               | 0 (0%)                           | 3 (18.75%)            | 0 (0%)                  |
| Anxiety                     | 0 (0%)                           | 1 (6.25%)             | 0 (0%)                  |
| Arthralgia                  | 2 (11.76%)                       | 1 (6.25%)             | 0 (0%)                  |
| AST increased               | 2 (11.76%)                       | 2 (12.5%)             | 1 (6.25%)               |
| Bilirubin total high        | 0 (0%)                           | 1 (6.25%)             | 0 (0%)                  |
| Blood eosinophils increased | 0 (0%)                           | 1 (6.25%)             | 0 (0%)                  |
| Bradycardia                 | 1 (5.88%)                        | 1 (6.25%)             | 0 (0%)                  |
| BUN increased               | 2 (11.76%)                       | 0 (0%)                | 1 (6.25%)               |
| Campylobacter               | 0 (0%)                           | 0 (0%)                | 1 (6.25%)               |
| Candida vaginitis           | 0 (0%)                           | 0 (0%)                | 2 (12.5%)               |
| Chills                      | 1 (5.88%)                        | 2 (12.5%)             | 1 (6.25%)               |
| Common cold                 | 1 (5.88%)                        | 0 (0%)                | 1 (6.25%)               |
| Constipation                | 0 (0%)                           | 0 (0%)                | 1 (6.25%)               |
| Coryza                      | 1 (5.88%)                        | 0 (0%)                | 1 (6.25%)               |
| CPK increased               | 2 (11.76%)                       | 0 (0%)                | 4 (25%)                 |
| Creatine kinase             | 0 (0%)                           | 0 (0%)                | 0 (0%)                  |
| Creatine kinase high        | 1 (5.88%)                        | 0 (0%)                | 0 (0%)                  |
| Creatinine increased        | 1 (5.88%)                        | 0 (0%)                | 0 (0%)                  |
| Dermatitis                  | 0 (0%)                           | 0 (0%)                | 0 (0%)                  |
| Diaphoresis                 | 1 (5.88%)                        | 2 (12.5%)             | 1 (6.25%)               |
| Diarrhea                    | 1 (5.88%)                        | 0 (0%)                | 1 (6.25%)               |
| Difficulty sleeping         | 1 (5.88%)                        | 0 (0%)                | 0 (0%)                  |
| Dry cough                   | 2 (11.76%)                       | 0 (0%)                | 0 (0%)                  |
| Eczema                      | 1 (5.88%)                        | 0 (0%)                | 0 (0%)                  |
| Elevated liver enzymes      | 1 (5.88%)                        | 0 (0%)                | 0 (0%)                  |
| Elevated serum creatinine   | 1 (5.88%)                        | 0 (0%)                | 0 (0%)                  |

| <b>Event</b>              | <b>Adjuvant + AGS-V (N = 17)</b> | <b>AGS-V (N = 16)</b> | <b>Placebo (N = 16)</b> |
|---------------------------|----------------------------------|-----------------------|-------------------------|
| Eosinophilia              | 0 (0%)                           | 1 (6.25%)             | 0 (0%)                  |
| Erythema                  | 15 (88.24%)                      | 15 (93.75%)           | 15 (93.75%)             |
| Eyelid Stye               | 0 (0%)                           | 1 (6.25%)             | 0 (0%)                  |
| Fatigue                   | 8 (47.06%)                       | 5 (31.25%)            | 4 (25%)                 |
| Fever                     | 0 (0%)                           | 0 (0%)                | 2 (12.5%)               |
| Feverish                  | 5 (29.41%)                       | 1 (6.25%)             | 3 (18.75%)              |
| Gastritis                 | 0 (0%)                           | 0 (0%)                | 1 (6.25%)               |
| Headache                  | 7 (41.18%)                       | 6 (37.5%)             | 4 (25%)                 |
| Hematuria                 | 1 (5.88%)                        | 1 (6.25%)             | 2 (12.5%)               |
| Hemoglobin decreased      | 7 (41.18%)                       | 8 (50%)               | 5 (31.25%)              |
| Hyperglycemia             | 0 (0%)                           | 2 (12.5%)             | 1 (6.25%)               |
| Hypernatremia             | 2 (11.76%)                       | 4 (25%)               | 2 (12.5%)               |
| Hypertension              | 1 (5.88%)                        | 0 (0%)                | 0 (0%)                  |
| Hypocalcemia              | 1 (5.88%)                        | 1 (6.25%)             | 0 (0%)                  |
| Hypoglycemia              | 2 (11.76%)                       | 2 (12.5%)             | 2 (12.5%)               |
| Hypokalemia               | 1 (5.88%)                        | 1 (6.25%)             | 1 (6.25%)               |
| Hyponatremia              | 1 (5.88%)                        | 0 (0%)                | 0 (0%)                  |
| Hypophosphatemia          | 1 (5.88%)                        | 2 (12.5%)             | 2 (12.5%)               |
| Influenza                 | 0 (0%)                           | 0 (0%)                | 0 (0%)                  |
| Injection site erythema   | 5 (29.41%)                       | 1 (6.25%)             | 1 (6.25%)               |
| Injection site induration | 1 (5.88%)                        | 0 (0%)                | 0 (0%)                  |
| Injection site itching    | 6 (35.29%)                       | 1 (6.25%)             | 0 (0%)                  |
| Injection site pain       | 9 (52.94%)                       | 6 (37.5%)             | 4 (25%)                 |
| Injection site pruritus   | 0 (0%)                           | 2 (12.5%)             | 0 (0%)                  |
| Injection site swelling   | 8 (47.06%)                       | 0 (0%)                | 0 (0%)                  |
| Injury                    | 0 (0%)                           | 1 (6.25%)             | 0 (0%)                  |

| <b>Event</b>               | <b>Adjuvant + AGS-V (N = 17)</b> | <b>AGS-V (N = 16)</b> | <b>Placebo (N = 16)</b> |
|----------------------------|----------------------------------|-----------------------|-------------------------|
| Insect bite                | 0 (0%)                           | 0 (0%)                | 1 (6.25%)               |
| Iron deficiency anemia     | 0 (0%)                           | 0 (0%)                | 0 (0%)                  |
| Knee pain                  | 1 (5.88%)                        | 0 (0%)                | 0 (0%)                  |
| Laryngitis                 | 0 (0%)                           | 0 (0%)                | 1 (6.25%)               |
| Local swelling             | 16 (94.12%)                      | 15 (93.75%)           | 15 (93.75%)             |
| Lymph node tenderness      | 1 (5.88%)                        | 0 (0%)                | 0 (0%)                  |
| Lymphocyte count increased | 1 (5.88%)                        | 0 (0%)                | 0 (0%)                  |
| Muscle ache                | 2 (11.76%)                       | 0 (0%)                | 0 (0%)                  |
| Muscle strain              | 1 (5.88%)                        | 0 (0%)                | 0 (0%)                  |
| Myalgia                    | 5 (29.41%)                       | 3 (18.75%)            | 5 (31.25%)              |
| Nasal congestion           | 2 (11.76%)                       | 1 (6.25%)             | 1 (6.25%)               |
| Nausea                     | 2 (11.76%)                       | 3 (18.75%)            | 2 (12.5%)               |
| Neutrophil count decreased | 1 (5.88%)                        | 4 (25%)               | 2 (12.5%)               |
| Oral pain                  | 0 (0%)                           | 0 (0%)                | 0 (0%)                  |
| Peripheral neuropathy      | 0 (0%)                           | 0 (0%)                | 1 (6.25%)               |
| Productive cough           | 1 (5.88%)                        | 0 (0%)                | 0 (0%)                  |
| Pruritic rash              | 0 (0%)                           | 1 (6.25%)             | 0 (0%)                  |
| Pruritus                   | 1 (5.88%)                        | 0 (0%)                | 0 (0%)                  |
| Rash                       | 0 (0%)                           | 0 (0%)                | 2 (12.5%)               |
| Rhinorrhea                 | 1 (5.88%)                        | 0 (0%)                | 1 (6.25%)               |
| Sinusitis                  | 0 (0%)                           | 0 (0%)                | 0 (0%)                  |
| Skin hyperpigmentation     | 1 (5.88%)                        | 1 (6.25%)             | 0 (0%)                  |
| Skin induration            | 1 (5.88%)                        | 0 (0%)                | 0 (0%)                  |
| Sore throat                | 2 (11.76%)                       | 1 (6.25%)             | 1 (6.25%)               |
| Systolic hypertension      | 0 (0%)                           | 1 (6.25%)             | 0 (0%)                  |
| Tenderness                 | 1 (5.88%)                        | 0 (0%)                | 0 (0%)                  |

| <b>Event</b>                      | <b>Adjuvant + AGS-V (N = 17)</b> | <b>AGS-V (N = 16)</b> | <b>Placebo (N = 16)</b> |
|-----------------------------------|----------------------------------|-----------------------|-------------------------|
| Tooth extraction                  | 0 (0%)                           | 0 (0%)                | 0 (0%)                  |
| Torn bicep tendon                 | 0 (0%)                           | 0 (0%)                | 0 (0%)                  |
| Upper respiratory tract infection | 0 (0%)                           | 1 (6.25%)             | 0 (0%)                  |
| Urinary frequency                 | 0 (0%)                           | 0 (0%)                | 1 (6.25%)               |
| Urinary tract infection           | 0 (0%)                           | 0 (0%)                | 0 (0%)                  |
| Urine WBC increased               | 0 (0%)                           | 2 (12.5%)             | 0 (0%)                  |
| Urticaria                         | 0 (0%)                           | 0 (0%)                | 0 (0%)                  |
| Vertigo                           | 0 (0%)                           | 0 (0%)                | 0 (0%)                  |
| Vitamin D deficiency              | 1 (5.88%)                        | 0 (0%)                | 0 (0%)                  |
| Vomiting                          | 0 (0%)                           | 1 (6.25%)             | 0 (0%)                  |
| WBC decreased                     | 0 (0%)                           | 0 (0%)                | 2 (12.5%)               |
| WBC increased                     | 1 (5.88%)                        | 2 (12.5%)             | 1 (6.25%)               |

**Table 5 : Occurrence of Grade 2 Events by Treatment Group**

| <b>Event</b>                         | <b>Adjuvant + AGS-V (N = 17)</b> | <b>AGS-V (N = 16)</b> | <b>Placebo (N = 16)</b> |
|--------------------------------------|----------------------------------|-----------------------|-------------------------|
| Abdominal cramps                     | 0 (0%)                           | 0 (0%)                | 0 (0%)                  |
| Abdominal pain                       | 0 (0%)                           | 0 (0%)                | 0 (0%)                  |
| Absolute neutrophil count, decreased | 0 (0%)                           | 1 (6.25%)             | 1 (6.25%)               |
| Acute sinusitis                      | 0 (0%)                           | 0 (0%)                | 0 (0%)                  |
| ALT increased                        | 0 (0%)                           | 0 (0%)                | 0 (0%)                  |
| Anxiety                              | 0 (0%)                           | 0 (0%)                | 0 (0%)                  |
| Arthralgia                           | 2 (11.76%)                       | 0 (0%)                | 0 (0%)                  |
| AST increased                        | 0 (0%)                           | 0 (0%)                | 0 (0%)                  |

| <b>Event</b>                | <b>Adjuvant + AGS-V (N = 17)</b> | <b>AGS-V (N = 16)</b> | <b>Placebo (N = 16)</b> |
|-----------------------------|----------------------------------|-----------------------|-------------------------|
| Bilirubin total high        | 0 (0%)                           | 0 (0%)                | 0 (0%)                  |
| Blood eosinophils increased | 0 (0%)                           | 0 (0%)                | 0 (0%)                  |
| Bradycardia                 | 0 (0%)                           | 0 (0%)                | 0 (0%)                  |
| BUN increased               | 1 (5.88%)                        | 0 (0%)                | 0 (0%)                  |
| Campylobacter               | 0 (0%)                           | 0 (0%)                | 0 (0%)                  |
| Candida vaginitis           | 0 (0%)                           | 0 (0%)                | 0 (0%)                  |
| Chills                      | 3 (17.65%)                       | 0 (0%)                | 0 (0%)                  |
| Common cold                 | 0 (0%)                           | 0 (0%)                | 0 (0%)                  |
| Constipation                | 0 (0%)                           | 0 (0%)                | 0 (0%)                  |
| Coryza                      | 1 (5.88%)                        | 0 (0%)                | 0 (0%)                  |
| CPK increased               | 5 (29.41%)                       | 2 (12.5%)             | 4 (25%)                 |
| Creatine kinase             | 0 (0%)                           | 0 (0%)                | 1 (6.25%)               |
| Creatine kinase high        | 1 (5.88%)                        | 1 (6.25%)             | 0 (0%)                  |
| Creatinine increased        | 0 (0%)                           | 0 (0%)                | 0 (0%)                  |
| Dermatitis                  | 0 (0%)                           | 0 (0%)                | 0 (0%)                  |
| Diaphoresis                 | 1 (5.88%)                        | 0 (0%)                | 0 (0%)                  |
| Diarrhea                    | 1 (5.88%)                        | 0 (0%)                | 0 (0%)                  |
| Difficulty sleeping         | 0 (0%)                           | 0 (0%)                | 0 (0%)                  |
| Dry cough                   | 0 (0%)                           | 0 (0%)                | 0 (0%)                  |
| Eczema                      | 0 (0%)                           | 0 (0%)                | 0 (0%)                  |
| Elevated liver enzymes      | 0 (0%)                           | 0 (0%)                | 0 (0%)                  |
| Elevated serum creatinine   | 0 (0%)                           | 0 (0%)                | 0 (0%)                  |
| Eosinophilia                | 0 (0%)                           | 0 (0%)                | 0 (0%)                  |
| Erythema                    | 1 (5.88%)                        | 0 (0%)                | 0 (0%)                  |
| Eyelid Sty                  | 0 (0%)                           | 0 (0%)                | 0 (0%)                  |
| Fatigue                     | 3 (17.65%)                       | 0 (0%)                | 1 (6.25%)               |



| <b>Event</b>              | <b>Adjuvant + AGS-V (N = 17)</b> | <b>AGS-V (N = 16)</b> | <b>Placebo (N = 16)</b> |
|---------------------------|----------------------------------|-----------------------|-------------------------|
| Fever                     | 1 (5.88%)                        | 0 (0%)                | 0 (0%)                  |
| Feverish                  | 3 (17.65%)                       | 0 (0%)                | 0 (0%)                  |
| Gastritis                 | 0 (0%)                           | 0 (0%)                | 0 (0%)                  |
| Headache                  | 4 (23.53%)                       | 2 (12.5%)             | 0 (0%)                  |
| Hematuria                 | 0 (0%)                           | 0 (0%)                | 2 (12.5%)               |
| Hemoglobin decreased      | 1 (5.88%)                        | 4 (25%)               | 1 (6.25%)               |
| Hyperglycemia             | 1 (5.88%)                        | 2 (12.5%)             | 2 (12.5%)               |
| Hypernatremia             | 1 (5.88%)                        | 0 (0%)                | 1 (6.25%)               |
| Hypertension              | 0 (0%)                           | 0 (0%)                | 0 (0%)                  |
| Hypocalcemia              | 0 (0%)                           | 0 (0%)                | 0 (0%)                  |
| Hypoglycemia              | 1 (5.88%)                        | 0 (0%)                | 2 (12.5%)               |
| Hypokalemia               | 1 (5.88%)                        | 1 (6.25%)             | 1 (6.25%)               |
| Hyponatremia              | 0 (0%)                           | 0 (0%)                | 0 (0%)                  |
| Hypophosphatemia          | 1 (5.88%)                        | 3 (18.75%)            | 1 (6.25%)               |
| Influenza                 | 1 (5.88%)                        | 0 (0%)                | 0 (0%)                  |
| Injection site erythema   | 4 (23.53%)                       | 0 (0%)                | 0 (0%)                  |
| Injection site induration | 0 (0%)                           | 0 (0%)                | 0 (0%)                  |
| Injection site itching    | 0 (0%)                           | 0 (0%)                | 0 (0%)                  |
| Injection site pain       | 2 (11.76%)                       | 0 (0%)                | 1 (6.25%)               |
| Injection site pruritus   | 0 (0%)                           | 0 (0%)                | 0 (0%)                  |
| Injection site swelling   | 1 (5.88%)                        | 0 (0%)                | 0 (0%)                  |
| Injury                    | 0 (0%)                           | 0 (0%)                | 0 (0%)                  |
| Insect bite               | 0 (0%)                           | 0 (0%)                | 0 (0%)                  |
| Iron deficiency anemia    | 0 (0%)                           | 1 (6.25%)             | 0 (0%)                  |
| Knee pain                 | 0 (0%)                           | 0 (0%)                | 0 (0%)                  |
| Laryngitis                | 0 (0%)                           | 0 (0%)                | 0 (0%)                  |

| <b>Event</b>                      | <b>Adjuvant + AGS-V (N = 17)</b> | <b>AGS-V (N = 16)</b> | <b>Placebo (N = 16)</b> |
|-----------------------------------|----------------------------------|-----------------------|-------------------------|
| Local swelling                    | 0 (0%)                           | 0 (0%)                | 0 (0%)                  |
| Lymph node tenderness             | 0 (0%)                           | 0 (0%)                | 0 (0%)                  |
| Lymphocyte count increased        | 0 (0%)                           | 0 (0%)                | 0 (0%)                  |
| Muscle ache                       | 0 (0%)                           | 0 (0%)                | 0 (0%)                  |
| Muscle strain                     | 0 (0%)                           | 0 (0%)                | 0 (0%)                  |
| Myalgia                           | 1 (5.88%)                        | 1 (6.25%)             | 1 (6.25%)               |
| Nasal congestion                  | 0 (0%)                           | 0 (0%)                | 0 (0%)                  |
| Nausea                            | 0 (0%)                           | 1 (6.25%)             | 0 (0%)                  |
| Neutrophil count decreased        | 0 (0%)                           | 1 (6.25%)             | 1 (6.25%)               |
| Oral pain                         | 1 (5.88%)                        | 0 (0%)                | 0 (0%)                  |
| Peripheral neuropathy             | 0 (0%)                           | 0 (0%)                | 0 (0%)                  |
| Productive cough                  | 0 (0%)                           | 0 (0%)                | 0 (0%)                  |
| Pruritic rash                     | 1 (5.88%)                        | 0 (0%)                | 0 (0%)                  |
| Pruritus                          | 0 (0%)                           | 0 (0%)                | 0 (0%)                  |
| Rash                              | 0 (0%)                           | 0 (0%)                | 0 (0%)                  |
| Rhinorrhea                        | 0 (0%)                           | 0 (0%)                | 0 (0%)                  |
| Sinusitis                         | 1 (5.88%)                        | 0 (0%)                | 0 (0%)                  |
| Skin hyperpigmentation            | 0 (0%)                           | 0 (0%)                | 0 (0%)                  |
| Skin induration                   | 0 (0%)                           | 0 (0%)                | 0 (0%)                  |
| Sore throat                       | 1 (5.88%)                        | 1 (6.25%)             | 0 (0%)                  |
| Systolic hypertension             | 0 (0%)                           | 0 (0%)                | 0 (0%)                  |
| Tenderness                        | 0 (0%)                           | 0 (0%)                | 0 (0%)                  |
| Tooth extraction                  | 1 (5.88%)                        | 0 (0%)                | 0 (0%)                  |
| Torn bicep tendon                 | 0 (0%)                           | 0 (0%)                | 0 (0%)                  |
| Upper respiratory tract infection | 0 (0%)                           | 0 (0%)                | 0 (0%)                  |
| Urinary frequency                 | 0 (0%)                           | 0 (0%)                | 0 (0%)                  |

| <b>Event</b>            | <b>Adjuvant + AGS-V (N = 17)</b> | <b>AGS-V (N = 16)</b> | <b>Placebo (N = 16)</b> |
|-------------------------|----------------------------------|-----------------------|-------------------------|
| Urinary tract infection | 0 (0%)                           | 0 (0%)                | 0 (0%)                  |
| Urine WBC increased     | 0 (0%)                           | 0 (0%)                | 0 (0%)                  |
| Urticaria               | 0 (0%)                           | 0 (0%)                | 0 (0%)                  |
| Vertigo                 | 0 (0%)                           | 0 (0%)                | 0 (0%)                  |
| Vitamin D deficiency    | 0 (0%)                           | 0 (0%)                | 0 (0%)                  |
| Vomiting                | 0 (0%)                           | 1 (6.25%)             | 0 (0%)                  |
| WBC decreased           | 0 (0%)                           | 0 (0%)                | 1 (6.25%)               |
| WBC increased           | 0 (0%)                           | 0 (0%)                | 0 (0%)                  |

**Table 6 : Occurrence of Grade 3 Events by Treatment Group**

| <b>Event</b>                         | <b>Adjuvant + AGS-V (N = 17)</b> | <b>AGS-V (N = 16)</b> | <b>Placebo (N = 16)</b> |
|--------------------------------------|----------------------------------|-----------------------|-------------------------|
| Abdominal cramps                     | 0 (0%)                           | 0 (0%)                | 0 (0%)                  |
| Abdominal pain                       | 0 (0%)                           | 0 (0%)                | 0 (0%)                  |
| Absolute neutrophil count, decreased | 0 (0%)                           | 1 (6.25%)             | 1 (6.25%)               |
| Acute sinusitis                      | 0 (0%)                           | 0 (0%)                | 0 (0%)                  |
| ALT increased                        | 0 (0%)                           | 0 (0%)                | 0 (0%)                  |
| Anxiety                              | 0 (0%)                           | 0 (0%)                | 0 (0%)                  |
| Arthralgia                           | 0 (0%)                           | 0 (0%)                | 0 (0%)                  |
| AST increased                        | 0 (0%)                           | 0 (0%)                | 0 (0%)                  |
| Bilirubin total high                 | 0 (0%)                           | 0 (0%)                | 0 (0%)                  |
| Blood eosinophils increased          | 0 (0%)                           | 0 (0%)                | 0 (0%)                  |
| Bradycardia                          | 1 (5.88%)                        | 0 (0%)                | 0 (0%)                  |
| BUN increased                        | 0 (0%)                           | 0 (0%)                | 0 (0%)                  |
| Campylobacter                        | 0 (0%)                           | 0 (0%)                | 0 (0%)                  |
| Candida vaginitis                    | 0 (0%)                           | 0 (0%)                | 0 (0%)                  |
| Chills                               | 0 (0%)                           | 0 (0%)                | 0 (0%)                  |

| <b>Event</b>              | <b>Adjuvant + AGS-V (N = 17)</b> | <b>AGS-V (N = 16)</b> | <b>Placebo (N = 16)</b> |
|---------------------------|----------------------------------|-----------------------|-------------------------|
| Common cold               | 0 (0%)                           | 0 (0%)                | 0 (0%)                  |
| Constipation              | 0 (0%)                           | 0 (0%)                | 0 (0%)                  |
| Coryza                    | 0 (0%)                           | 0 (0%)                | 0 (0%)                  |
| CPK increased             | 1 (5.88%)                        | 0 (0%)                | 3 (18.75%)              |
| Creatine kinase           | 0 (0%)                           | 0 (0%)                | 0 (0%)                  |
| Creatine kinase high      | 0 (0%)                           | 0 (0%)                | 1 (6.25%)               |
| Creatinine increased      | 0 (0%)                           | 0 (0%)                | 0 (0%)                  |
| Dermatitis                | 1 (5.88%)                        | 0 (0%)                | 0 (0%)                  |
| Diaphoresis               | 0 (0%)                           | 0 (0%)                | 0 (0%)                  |
| Diarrhea                  | 0 (0%)                           | 0 (0%)                | 0 (0%)                  |
| Difficulty sleeping       | 0 (0%)                           | 0 (0%)                | 0 (0%)                  |
| Dry cough                 | 0 (0%)                           | 0 (0%)                | 0 (0%)                  |
| Eczema                    | 0 (0%)                           | 0 (0%)                | 0 (0%)                  |
| Elevated liver enzymes    | 0 (0%)                           | 0 (0%)                | 0 (0%)                  |
| Elevated serum creatinine | 0 (0%)                           | 0 (0%)                | 0 (0%)                  |
| Eosinophilia              | 0 (0%)                           | 0 (0%)                | 0 (0%)                  |
| Erythema                  | 0 (0%)                           | 0 (0%)                | 0 (0%)                  |
| Eyelid Stye               | 0 (0%)                           | 0 (0%)                | 0 (0%)                  |
| Fatigue                   | 0 (0%)                           | 0 (0%)                | 0 (0%)                  |
| Fever                     | 0 (0%)                           | 0 (0%)                | 0 (0%)                  |
| Feverish                  | 0 (0%)                           | 0 (0%)                | 0 (0%)                  |
| Gastritis                 | 0 (0%)                           | 0 (0%)                | 0 (0%)                  |
| Headache                  | 0 (0%)                           | 0 (0%)                | 0 (0%)                  |
| Hematuria                 | 0 (0%)                           | 2 (12.5%)             | 0 (0%)                  |
| Hemoglobin decreased      | 0 (0%)                           | 0 (0%)                | 0 (0%)                  |
| Hyperglycemia             | 0 (0%)                           | 0 (0%)                | 0 (0%)                  |

| <b>Event</b>               | <b>Adjuvant + AGS-V (N = 17)</b> | <b>AGS-V (N = 16)</b> | <b>Placebo (N = 16)</b> |
|----------------------------|----------------------------------|-----------------------|-------------------------|
| Hypernatremia              | 0 (0%)                           | 1 (6.25%)             | 0 (0%)                  |
| Hypertension               | 0 (0%)                           | 0 (0%)                | 0 (0%)                  |
| Hypocalcemia               | 0 (0%)                           | 0 (0%)                | 0 (0%)                  |
| Hypoglycemia               | 2 (11.76%)                       | 0 (0%)                | 1 (6.25%)               |
| Hypokalemia                | 0 (0%)                           | 0 (0%)                | 1 (6.25%)               |
| Hyponatremia               | 0 (0%)                           | 0 (0%)                | 0 (0%)                  |
| Hypophosphatemia           | 0 (0%)                           | 0 (0%)                | 0 (0%)                  |
| Influenza                  | 0 (0%)                           | 0 (0%)                | 0 (0%)                  |
| Injection site erythema    | 1 (5.88%)                        | 0 (0%)                | 0 (0%)                  |
| Injection site induration  | 0 (0%)                           | 0 (0%)                | 0 (0%)                  |
| Injection site itching     | 1 (5.88%)                        | 0 (0%)                | 0 (0%)                  |
| Injection site pain        | 0 (0%)                           | 0 (0%)                | 0 (0%)                  |
| Injection site pruritus    | 0 (0%)                           | 0 (0%)                | 0 (0%)                  |
| Injection site swelling    | 0 (0%)                           | 0 (0%)                | 0 (0%)                  |
| Injury                     | 0 (0%)                           | 0 (0%)                | 0 (0%)                  |
| Insect bite                | 0 (0%)                           | 0 (0%)                | 0 (0%)                  |
| Iron deficiency anemia     | 0 (0%)                           | 0 (0%)                | 0 (0%)                  |
| Knee pain                  | 0 (0%)                           | 0 (0%)                | 0 (0%)                  |
| Laryngitis                 | 0 (0%)                           | 0 (0%)                | 0 (0%)                  |
| Local swelling             | 0 (0%)                           | 0 (0%)                | 0 (0%)                  |
| Lymph node tenderness      | 0 (0%)                           | 0 (0%)                | 0 (0%)                  |
| Lymphocyte count increased | 0 (0%)                           | 0 (0%)                | 0 (0%)                  |
| Muscle ache                | 0 (0%)                           | 0 (0%)                | 0 (0%)                  |
| Muscle strain              | 0 (0%)                           | 0 (0%)                | 0 (0%)                  |
| Myalgia                    | 0 (0%)                           | 0 (0%)                | 0 (0%)                  |
| Nasal congestion           | 0 (0%)                           | 0 (0%)                | 0 (0%)                  |

| <b>Event</b>                      | <b>Adjuvant + AGS-V (N = 17)</b> | <b>AGS-V (N = 16)</b> | <b>Placebo (N = 16)</b> |
|-----------------------------------|----------------------------------|-----------------------|-------------------------|
| Nausea                            | 0 (0%)                           | 0 (0%)                | 0 (0%)                  |
| Neutrophil count decreased        | 0 (0%)                           | 0 (0%)                | 0 (0%)                  |
| Oral pain                         | 0 (0%)                           | 0 (0%)                | 0 (0%)                  |
| Peripheral neuropathy             | 0 (0%)                           | 0 (0%)                | 0 (0%)                  |
| Productive cough                  | 0 (0%)                           | 0 (0%)                | 0 (0%)                  |
| Pruritic rash                     | 1 (5.88%)                        | 0 (0%)                | 0 (0%)                  |
| Pruritus                          | 0 (0%)                           | 0 (0%)                | 0 (0%)                  |
| Rash                              | 0 (0%)                           | 0 (0%)                | 1 (6.25%)               |
| Rhinorrhea                        | 0 (0%)                           | 0 (0%)                | 0 (0%)                  |
| Sinusitis                         | 0 (0%)                           | 0 (0%)                | 0 (0%)                  |
| Skin hyperpigmentation            | 0 (0%)                           | 0 (0%)                | 0 (0%)                  |
| Skin induration                   | 0 (0%)                           | 0 (0%)                | 0 (0%)                  |
| Sore throat                       | 0 (0%)                           | 0 (0%)                | 0 (0%)                  |
| Systolic hypertension             | 0 (0%)                           | 0 (0%)                | 0 (0%)                  |
| Tenderness                        | 0 (0%)                           | 0 (0%)                | 0 (0%)                  |
| Tooth extraction                  | 0 (0%)                           | 0 (0%)                | 0 (0%)                  |
| Torn bicep tendon                 | 1 (5.88%)                        | 0 (0%)                | 0 (0%)                  |
| Upper respiratory tract infection | 0 (0%)                           | 0 (0%)                | 0 (0%)                  |
| Urinary frequency                 | 0 (0%)                           | 0 (0%)                | 0 (0%)                  |
| Urinary tract infection           | 0 (0%)                           | 1 (6.25%)             | 1 (6.25%)               |
| Urine WBC increased               | 0 (0%)                           | 0 (0%)                | 0 (0%)                  |
| Urticaria                         | 1 (5.88%)                        | 0 (0%)                | 0 (0%)                  |
| Vertigo                           | 0 (0%)                           | 0 (0%)                | 1 (6.25%)               |
| Vitamin D deficiency              | 0 (0%)                           | 0 (0%)                | 0 (0%)                  |
| Vomiting                          | 0 (0%)                           | 0 (0%)                | 0 (0%)                  |
| WBC decreased                     | 0 (0%)                           | 0 (0%)                | 0 (0%)                  |

| <b>Event</b>  | <b>Adjuvant + AGS-V (N = 17)</b> | <b>AGS-V (N = 16)</b> | <b>Placebo (N = 16)</b> |
|---------------|----------------------------------|-----------------------|-------------------------|
| WBC increased | 0 (0%)                           | 0 (0%)                | 0 (0%)                  |

**Table 7 : Occurrence of Grade 4 Events by Treatment Group**

| <b>Event</b>                         | <b>Adjuvant + AGS-V (N = 17)</b> | <b>AGS-V (N = 16)</b> | <b>Placebo (N = 16)</b> |
|--------------------------------------|----------------------------------|-----------------------|-------------------------|
| Abdominal cramps                     | 0 (0%)                           | 0 (0%)                | 0 (0%)                  |
| Abdominal pain                       | 0 (0%)                           | 0 (0%)                | 0 (0%)                  |
| Absolute neutrophil count, decreased | 0 (0%)                           | 0 (0%)                | 0 (0%)                  |
| Acute sinusitis                      | 0 (0%)                           | 0 (0%)                | 0 (0%)                  |
| ALT increased                        | 0 (0%)                           | 0 (0%)                | 0 (0%)                  |
| Anxiety                              | 0 (0%)                           | 0 (0%)                | 0 (0%)                  |
| Arthralgia                           | 0 (0%)                           | 0 (0%)                | 0 (0%)                  |
| AST increased                        | 0 (0%)                           | 0 (0%)                | 0 (0%)                  |
| Bilirubin total high                 | 0 (0%)                           | 0 (0%)                | 0 (0%)                  |
| Blood eosinophils increased          | 0 (0%)                           | 0 (0%)                | 0 (0%)                  |
| Bradycardia                          | 0 (0%)                           | 0 (0%)                | 0 (0%)                  |
| BUN increased                        | 0 (0%)                           | 0 (0%)                | 0 (0%)                  |
| Campylobacter                        | 0 (0%)                           | 0 (0%)                | 0 (0%)                  |
| Candida vaginitis                    | 0 (0%)                           | 0 (0%)                | 0 (0%)                  |
| Chills                               | 0 (0%)                           | 0 (0%)                | 0 (0%)                  |
| Common cold                          | 0 (0%)                           | 0 (0%)                | 0 (0%)                  |
| Constipation                         | 0 (0%)                           | 0 (0%)                | 0 (0%)                  |
| Coryza                               | 0 (0%)                           | 0 (0%)                | 0 (0%)                  |

| <b>Event</b>              | <b>Adjuvant + AGS-V (N = 17)</b> | <b>AGS-V (N = 16)</b> | <b>Placebo (N = 16)</b> |
|---------------------------|----------------------------------|-----------------------|-------------------------|
| CPK increased             | 1 (5.88%)                        | 1 (6.25%)             | 0 (0%)                  |
| Creatine kinase           | 0 (0%)                           | 0 (0%)                | 0 (0%)                  |
| Creatine kinase high      | 0 (0%)                           | 0 (0%)                | 0 (0%)                  |
| Creatinine increased      | 0 (0%)                           | 0 (0%)                | 0 (0%)                  |
| Dermatitis                | 0 (0%)                           | 0 (0%)                | 0 (0%)                  |
| Diaphoresis               | 0 (0%)                           | 0 (0%)                | 0 (0%)                  |
| Diarrhea                  | 0 (0%)                           | 0 (0%)                | 0 (0%)                  |
| Difficulty sleeping       | 0 (0%)                           | 0 (0%)                | 0 (0%)                  |
| Dry cough                 | 0 (0%)                           | 0 (0%)                | 0 (0%)                  |
| Eczema                    | 0 (0%)                           | 0 (0%)                | 0 (0%)                  |
| Elevated liver enzymes    | 0 (0%)                           | 0 (0%)                | 0 (0%)                  |
| Elevated serum creatinine | 0 (0%)                           | 0 (0%)                | 0 (0%)                  |
| Eosinophilia              | 0 (0%)                           | 0 (0%)                | 0 (0%)                  |
| Erythema                  | 0 (0%)                           | 0 (0%)                | 0 (0%)                  |
| Eyelid Stye               | 0 (0%)                           | 0 (0%)                | 0 (0%)                  |
| Fatigue                   | 0 (0%)                           | 0 (0%)                | 0 (0%)                  |
| Fever                     | 0 (0%)                           | 0 (0%)                | 0 (0%)                  |
| Feverish                  | 0 (0%)                           | 0 (0%)                | 0 (0%)                  |
| Gastritis                 | 0 (0%)                           | 0 (0%)                | 0 (0%)                  |
| Headache                  | 0 (0%)                           | 0 (0%)                | 0 (0%)                  |
| Hematuria                 | 0 (0%)                           | 0 (0%)                | 0 (0%)                  |
| Hemoglobin decreased      | 0 (0%)                           | 0 (0%)                | 0 (0%)                  |
| Hyperglycemia             | 0 (0%)                           | 0 (0%)                | 0 (0%)                  |
| Hypnatremia               | 0 (0%)                           | 0 (0%)                | 0 (0%)                  |
| Hypertension              | 0 (0%)                           | 0 (0%)                | 0 (0%)                  |
| Hypocalcemia              | 0 (0%)                           | 0 (0%)                | 0 (0%)                  |



| <b>Event</b>               | <b>Adjuvant + AGS-V (N = 17)</b> | <b>AGS-V (N = 16)</b> | <b>Placebo (N = 16)</b> |
|----------------------------|----------------------------------|-----------------------|-------------------------|
| Hypoglycemia               | 0 (0%)                           | 0 (0%)                | 0 (0%)                  |
| Hypokalemia                | 0 (0%)                           | 0 (0%)                | 0 (0%)                  |
| Hyponatremia               | 0 (0%)                           | 0 (0%)                | 0 (0%)                  |
| Hypophosphatemia           | 0 (0%)                           | 0 (0%)                | 0 (0%)                  |
| Influenza                  | 0 (0%)                           | 0 (0%)                | 0 (0%)                  |
| Injection site erythema    | 0 (0%)                           | 0 (0%)                | 0 (0%)                  |
| Injection site induration  | 0 (0%)                           | 0 (0%)                | 0 (0%)                  |
| Injection site itching     | 0 (0%)                           | 0 (0%)                | 0 (0%)                  |
| Injection site pain        | 0 (0%)                           | 0 (0%)                | 0 (0%)                  |
| Injection site pruritus    | 0 (0%)                           | 0 (0%)                | 0 (0%)                  |
| Injection site swelling    | 0 (0%)                           | 0 (0%)                | 0 (0%)                  |
| Injury                     | 0 (0%)                           | 0 (0%)                | 0 (0%)                  |
| Insect bite                | 0 (0%)                           | 0 (0%)                | 0 (0%)                  |
| Iron deficiency anemia     | 0 (0%)                           | 0 (0%)                | 0 (0%)                  |
| Knee pain                  | 0 (0%)                           | 0 (0%)                | 0 (0%)                  |
| Laryngitis                 | 0 (0%)                           | 0 (0%)                | 0 (0%)                  |
| Local swelling             | 0 (0%)                           | 0 (0%)                | 0 (0%)                  |
| Lymph node tenderness      | 0 (0%)                           | 0 (0%)                | 0 (0%)                  |
| Lymphocyte count increased | 0 (0%)                           | 0 (0%)                | 0 (0%)                  |
| Muscle ache                | 0 (0%)                           | 0 (0%)                | 0 (0%)                  |
| Muscle strain              | 0 (0%)                           | 0 (0%)                | 0 (0%)                  |
| Myalgia                    | 0 (0%)                           | 0 (0%)                | 0 (0%)                  |
| Nasal congestion           | 0 (0%)                           | 0 (0%)                | 0 (0%)                  |
| Nausea                     | 0 (0%)                           | 0 (0%)                | 0 (0%)                  |
| Neutrophil count decreased | 0 (0%)                           | 0 (0%)                | 0 (0%)                  |
| Oral pain                  | 0 (0%)                           | 0 (0%)                | 0 (0%)                  |

| <b>Event</b>                      | <b>Adjuvant + AGS-V (N = 17)</b> | <b>AGS-V (N = 16)</b> | <b>Placebo (N = 16)</b> |
|-----------------------------------|----------------------------------|-----------------------|-------------------------|
| Peripheral neuropathy             | 0 (0%)                           | 0 (0%)                | 0 (0%)                  |
| Productive cough                  | 0 (0%)                           | 0 (0%)                | 0 (0%)                  |
| Pruritic rash                     | 0 (0%)                           | 0 (0%)                | 0 (0%)                  |
| Pruritus                          | 0 (0%)                           | 0 (0%)                | 0 (0%)                  |
| Rash                              | 0 (0%)                           | 0 (0%)                | 0 (0%)                  |
| Rhinorrhea                        | 0 (0%)                           | 0 (0%)                | 0 (0%)                  |
| Sinusitis                         | 0 (0%)                           | 0 (0%)                | 0 (0%)                  |
| Skin hyperpigmentation            | 0 (0%)                           | 0 (0%)                | 0 (0%)                  |
| Skin induration                   | 0 (0%)                           | 0 (0%)                | 0 (0%)                  |
| Sore throat                       | 0 (0%)                           | 0 (0%)                | 0 (0%)                  |
| Systolic hypertension             | 0 (0%)                           | 0 (0%)                | 0 (0%)                  |
| Tenderness                        | 0 (0%)                           | 0 (0%)                | 0 (0%)                  |
| Tooth extraction                  | 0 (0%)                           | 0 (0%)                | 0 (0%)                  |
| Torn bicep tendon                 | 0 (0%)                           | 0 (0%)                | 0 (0%)                  |
| Upper respiratory tract infection | 0 (0%)                           | 0 (0%)                | 0 (0%)                  |
| Urinary frequency                 | 0 (0%)                           | 0 (0%)                | 0 (0%)                  |
| Urinary tract infection           | 0 (0%)                           | 0 (0%)                | 0 (0%)                  |
| Urine WBC increased               | 0 (0%)                           | 0 (0%)                | 0 (0%)                  |
| Urticaria                         | 0 (0%)                           | 0 (0%)                | 0 (0%)                  |
| Vertigo                           | 0 (0%)                           | 0 (0%)                | 0 (0%)                  |
| Vitamin D deficiency              | 0 (0%)                           | 0 (0%)                | 0 (0%)                  |
| Vomiting                          | 0 (0%)                           | 0 (0%)                | 0 (0%)                  |
| WBC decreased                     | 0 (0%)                           | 0 (0%)                | 0 (0%)                  |
| WBC increased                     | 0 (0%)                           | 0 (0%)                | 0 (0%)                  |

**Table 8 : Occurrence of Max Grade Events Per Subject which are Unrelated to Treatment by Treatment Group**

**Note : In Tables 8-12, multiple occurrences of the same max grade event type with different relatedness are included in the respective table**

| Event                                | AGS-V + Adjuvant (N = 17) |         |            |            |           |           | AGS-V (N = 16) |         |           |           |           |         | Placebo (N = 16) |         |           |           |            |         |
|--------------------------------------|---------------------------|---------|------------|------------|-----------|-----------|----------------|---------|-----------|-----------|-----------|---------|------------------|---------|-----------|-----------|------------|---------|
|                                      | No Sx                     | Grade 0 | Grade 1    | Grade 2    | Grade 3   | Grade 4   | No Sx          | Grade 0 | Grade 1   | Grade 2   | Grade 3   | Grade 4 | No Sx            | Grade 0 | Grade 1   | Grade 2   | Grade 3    | Grade 4 |
| Abdominal cramps                     | 17 (100%)                 | 0 (0%)  | 0 (0%)     | 0 (0%)     | 0 (0%)    | 0 (0%)    | 15 (93.75%)    | 0 (0%)  | 1 (6.25%) | 0 (0%)    | 0 (0%)    | 0 (0%)  | 16 (100%)        | 0 (0%)  | 0 (0%)    | 0 (0%)    | 0 (0%)     | 0 (0%)  |
| Abdominal pain                       | 17 (100%)                 | 0 (0%)  | 0 (0%)     | 0 (0%)     | 0 (0%)    | 0 (0%)    | 16 (100%)      | 0 (0%)  | 0 (0%)    | 0 (0%)    | 0 (0%)    | 0 (0%)  | 15 (93.75%)      | 0 (0%)  | 1 (6.25%) | 0 (0%)    | 0 (0%)     | 0 (0%)  |
| Absolute neutrophil count, decreased | 16 (94.12%)               | 0 (0%)  | 1 (5.88%)  | 0 (0%)     | 0 (0%)    | 0 (0%)    | 15 (93.75%)    | 0 (0%)  | 0 (0%)    | 0 (0%)    | 1 (6.25%) | 0 (0%)  | 15 (93.75%)      | 0 (0%)  | 0 (0%)    | 0 (0%)    | 1 (6.25%)  | 0 (0%)  |
| Acute sinusitis                      | 17 (100%)                 | 0 (0%)  | 0 (0%)     | 0 (0%)     | 0 (0%)    | 0 (0%)    | 16 (100%)      | 0 (0%)  | 0 (0%)    | 0 (0%)    | 0 (0%)    | 0 (0%)  | 16 (100%)        | 0 (0%)  | 0 (0%)    | 0 (0%)    | 0 (0%)     | 0 (0%)  |
| ALT increased                        | 17 (100%)                 | 0 (0%)  | 0 (0%)     | 0 (0%)     | 0 (0%)    | 0 (0%)    | 14 (87.5%)     | 0 (0%)  | 2 (12.5%) | 0 (0%)    | 0 (0%)    | 0 (0%)  | 16 (100%)        | 0 (0%)  | 0 (0%)    | 0 (0%)    | 0 (0%)     | 0 (0%)  |
| Anxiety                              | 17 (100%)                 | 0 (0%)  | 0 (0%)     | 0 (0%)     | 0 (0%)    | 0 (0%)    | 15 (93.75%)    | 0 (0%)  | 1 (6.25%) | 0 (0%)    | 0 (0%)    | 0 (0%)  | 16 (100%)        | 0 (0%)  | 0 (0%)    | 0 (0%)    | 0 (0%)     | 0 (0%)  |
| Arthralgia                           | 17 (100%)                 | 0 (0%)  | 0 (0%)     | 0 (0%)     | 0 (0%)    | 0 (0%)    | 16 (100%)      | 0 (0%)  | 0 (0%)    | 0 (0%)    | 0 (0%)    | 0 (0%)  | 16 (100%)        | 0 (0%)  | 0 (0%)    | 0 (0%)    | 0 (0%)     | 0 (0%)  |
| AST increased                        | 15 (88.24%)               | 0 (0%)  | 2 (11.76%) | 0 (0%)     | 0 (0%)    | 0 (0%)    | 14 (87.5%)     | 0 (0%)  | 2 (12.5%) | 0 (0%)    | 0 (0%)    | 0 (0%)  | 15 (93.75%)      | 0 (0%)  | 1 (6.25%) | 0 (0%)    | 0 (0%)     | 0 (0%)  |
| Bilirubin total high                 | 17 (100%)                 | 0 (0%)  | 0 (0%)     | 0 (0%)     | 0 (0%)    | 0 (0%)    | 15 (93.75%)    | 0 (0%)  | 1 (6.25%) | 0 (0%)    | 0 (0%)    | 0 (0%)  | 16 (100%)        | 0 (0%)  | 0 (0%)    | 0 (0%)    | 0 (0%)     | 0 (0%)  |
| Blood eosinophils increased          | 17 (100%)                 | 0 (0%)  | 0 (0%)     | 0 (0%)     | 0 (0%)    | 0 (0%)    | 15 (93.75%)    | 0 (0%)  | 1 (6.25%) | 0 (0%)    | 0 (0%)    | 0 (0%)  | 16 (100%)        | 0 (0%)  | 0 (0%)    | 0 (0%)    | 0 (0%)     | 0 (0%)  |
| Bradycardia                          | 16 (94.12%)               | 0 (0%)  | 0 (0%)     | 0 (0%)     | 1 (5.88%) | 0 (0%)    | 15 (93.75%)    | 0 (0%)  | 1 (6.25%) | 0 (0%)    | 0 (0%)    | 0 (0%)  | 16 (100%)        | 0 (0%)  | 0 (0%)    | 0 (0%)    | 0 (0%)     | 0 (0%)  |
| BUN increased                        | 16 (94.12%)               | 0 (0%)  | 0 (0%)     | 1 (5.88%)  | 0 (0%)    | 0 (0%)    | 16 (100%)      | 0 (0%)  | 0 (0%)    | 0 (0%)    | 0 (0%)    | 0 (0%)  | 15 (93.75%)      | 0 (0%)  | 1 (6.25%) | 0 (0%)    | 0 (0%)     | 0 (0%)  |
| Campylobacter                        | 17 (100%)                 | 0 (0%)  | 0 (0%)     | 0 (0%)     | 0 (0%)    | 0 (0%)    | 16 (100%)      | 0 (0%)  | 0 (0%)    | 0 (0%)    | 0 (0%)    | 0 (0%)  | 15 (93.75%)      | 0 (0%)  | 1 (6.25%) | 0 (0%)    | 0 (0%)     | 0 (0%)  |
| Candida vaginitis                    | 17 (100%)                 | 0 (0%)  | 0 (0%)     | 0 (0%)     | 0 (0%)    | 0 (0%)    | 16 (100%)      | 0 (0%)  | 0 (0%)    | 0 (0%)    | 0 (0%)    | 0 (0%)  | 16 (100%)        | 0 (0%)  | 0 (0%)    | 0 (0%)    | 0 (0%)     | 0 (0%)  |
| Chills                               | 17 (100%)                 | 0 (0%)  | 0 (0%)     | 0 (0%)     | 0 (0%)    | 0 (0%)    | 15 (93.75%)    | 0 (0%)  | 1 (6.25%) | 0 (0%)    | 0 (0%)    | 0 (0%)  | 16 (100%)        | 0 (0%)  | 0 (0%)    | 0 (0%)    | 0 (0%)     | 0 (0%)  |
| Common cold                          | 17 (100%)                 | 0 (0%)  | 0 (0%)     | 0 (0%)     | 0 (0%)    | 0 (0%)    | 16 (100%)      | 0 (0%)  | 0 (0%)    | 0 (0%)    | 0 (0%)    | 0 (0%)  | 16 (100%)        | 0 (0%)  | 0 (0%)    | 0 (0%)    | 0 (0%)     | 0 (0%)  |
| Constipation                         | 17 (100%)                 | 0 (0%)  | 0 (0%)     | 0 (0%)     | 0 (0%)    | 0 (0%)    | 16 (100%)      | 0 (0%)  | 0 (0%)    | 0 (0%)    | 0 (0%)    | 0 (0%)  | 15 (93.75%)      | 0 (0%)  | 1 (6.25%) | 0 (0%)    | 0 (0%)     | 0 (0%)  |
| Coryza                               | 15 (88.24%)               | 0 (0%)  | 1 (5.88%)  | 1 (5.88%)  | 0 (0%)    | 0 (0%)    | 16 (100%)      | 0 (0%)  | 0 (0%)    | 0 (0%)    | 0 (0%)    | 0 (0%)  | 15 (93.75%)      | 0 (0%)  | 1 (6.25%) | 0 (0%)    | 0 (0%)     | 0 (0%)  |
| CPK increased                        | 13 (76.47%)               | 0 (0%)  | 0 (0%)     | 2 (11.76%) | 1 (5.88%) | 1 (5.88%) | 15 (93.75%)    | 0 (0%)  | 0 (0%)    | 1 (6.25%) | 0 (0%)    | 0 (0%)  | 10 (62.5%)       | 0 (0%)  | 1 (6.25%) | 2 (12.5%) | 3 (18.75%) | 0 (0%)  |
| Creatine kinase                      | 17 (100%)                 | 0 (0%)  | 0 (0%)     | 0 (0%)     | 0 (0%)    | 0 (0%)    | 16 (100%)      | 0 (0%)  | 0 (0%)    | 0 (0%)    | 0 (0%)    | 0 (0%)  | 16 (100%)        | 0 (0%)  | 0 (0%)    | 0 (0%)    | 0 (0%)     | 0 (0%)  |

| Event                     | AGS-V + Adjuvant (N = 17) |         |            |           |         |         | AGS-V (N = 16) |         |           |            |           |         | Placebo (N = 16) |         |           |           |         |         |
|---------------------------|---------------------------|---------|------------|-----------|---------|---------|----------------|---------|-----------|------------|-----------|---------|------------------|---------|-----------|-----------|---------|---------|
|                           | No Sx                     | Grade 0 | Grade 1    | Grade 2   | Grade 3 | Grade 4 | No Sx          | Grade 0 | Grade 1   | Grade 2    | Grade 3   | Grade 4 | No Sx            | Grade 0 | Grade 1   | Grade 2   | Grade 3 | Grade 4 |
| Creatine kinase high      | 16 (94.12%)               | 0 (0%)  | 0 (0%)     | 1 (5.88%) | 0 (0%)  | 0 (0%)  | 15 (93.75%)    | 0 (0%)  | 0 (0%)    | 1 (6.25%)  | 0 (0%)    | 0 (0%)  | 16 (100%)        | 0 (0%)  | 0 (0%)    | 0 (0%)    | 0 (0%)  | 0 (0%)  |
| Creatinine increased      | 16 (94.12%)               | 0 (0%)  | 1 (5.88%)  | 0 (0%)    | 0 (0%)  | 0 (0%)  | 16 (100%)      | 0 (0%)  | 0 (0%)    | 0 (0%)     | 0 (0%)    | 0 (0%)  | 16 (100%)        | 0 (0%)  | 0 (0%)    | 0 (0%)    | 0 (0%)  | 0 (0%)  |
| Dermatitis                | 17 (100%)                 | 0 (0%)  | 0 (0%)     | 0 (0%)    | 0 (0%)  | 0 (0%)  | 16 (100%)      | 0 (0%)  | 0 (0%)    | 0 (0%)     | 0 (0%)    | 0 (0%)  | 16 (100%)        | 0 (0%)  | 0 (0%)    | 0 (0%)    | 0 (0%)  | 0 (0%)  |
| Diaphoresis               | 17 (100%)                 | 0 (0%)  | 0 (0%)     | 0 (0%)    | 0 (0%)  | 0 (0%)  | 15 (93.75%)    | 0 (0%)  | 1 (6.25%) | 0 (0%)     | 0 (0%)    | 0 (0%)  | 16 (100%)        | 0 (0%)  | 0 (0%)    | 0 (0%)    | 0 (0%)  | 0 (0%)  |
| Diarrhea                  | 16 (94.12%)               | 0 (0%)  | 0 (0%)     | 1 (5.88%) | 0 (0%)  | 0 (0%)  | 16 (100%)      | 0 (0%)  | 0 (0%)    | 0 (0%)     | 0 (0%)    | 0 (0%)  | 15 (93.75%)      | 0 (0%)  | 1 (6.25%) | 0 (0%)    | 0 (0%)  | 0 (0%)  |
| Difficulty sleeping       | 16 (94.12%)               | 0 (0%)  | 1 (5.88%)  | 0 (0%)    | 0 (0%)  | 0 (0%)  | 16 (100%)      | 0 (0%)  | 0 (0%)    | 0 (0%)     | 0 (0%)    | 0 (0%)  | 16 (100%)        | 0 (0%)  | 0 (0%)    | 0 (0%)    | 0 (0%)  | 0 (0%)  |
| Dry cough                 | 15 (88.24%)               | 0 (0%)  | 2 (11.76%) | 0 (0%)    | 0 (0%)  | 0 (0%)  | 16 (100%)      | 0 (0%)  | 0 (0%)    | 0 (0%)     | 0 (0%)    | 0 (0%)  | 16 (100%)        | 0 (0%)  | 0 (0%)    | 0 (0%)    | 0 (0%)  | 0 (0%)  |
| Eczema                    | 16 (94.12%)               | 0 (0%)  | 1 (5.88%)  | 0 (0%)    | 0 (0%)  | 0 (0%)  | 16 (100%)      | 0 (0%)  | 0 (0%)    | 0 (0%)     | 0 (0%)    | 0 (0%)  | 16 (100%)        | 0 (0%)  | 0 (0%)    | 0 (0%)    | 0 (0%)  | 0 (0%)  |
| Elevated liver enzymes    | 17 (100%)                 | 0 (0%)  | 0 (0%)     | 0 (0%)    | 0 (0%)  | 0 (0%)  | 16 (100%)      | 0 (0%)  | 0 (0%)    | 0 (0%)     | 0 (0%)    | 0 (0%)  | 16 (100%)        | 0 (0%)  | 0 (0%)    | 0 (0%)    | 0 (0%)  | 0 (0%)  |
| Elevated serum creatinine | 16 (94.12%)               | 0 (0%)  | 1 (5.88%)  | 0 (0%)    | 0 (0%)  | 0 (0%)  | 16 (100%)      | 0 (0%)  | 0 (0%)    | 0 (0%)     | 0 (0%)    | 0 (0%)  | 16 (100%)        | 0 (0%)  | 0 (0%)    | 0 (0%)    | 0 (0%)  | 0 (0%)  |
| Eosinophilia              | 17 (100%)                 | 0 (0%)  | 0 (0%)     | 0 (0%)    | 0 (0%)  | 0 (0%)  | 16 (100%)      | 0 (0%)  | 0 (0%)    | 0 (0%)     | 0 (0%)    | 0 (0%)  | 16 (100%)        | 0 (0%)  | 0 (0%)    | 0 (0%)    | 0 (0%)  | 0 (0%)  |
| Erythema                  | 17 (100%)                 | 0 (0%)  | 0 (0%)     | 0 (0%)    | 0 (0%)  | 0 (0%)  | 16 (100%)      | 0 (0%)  | 0 (0%)    | 0 (0%)     | 0 (0%)    | 0 (0%)  | 16 (100%)        | 0 (0%)  | 0 (0%)    | 0 (0%)    | 0 (0%)  | 0 (0%)  |
| Eyelid Stye               | 17 (100%)                 | 0 (0%)  | 0 (0%)     | 0 (0%)    | 0 (0%)  | 0 (0%)  | 16 (100%)      | 0 (0%)  | 0 (0%)    | 0 (0%)     | 0 (0%)    | 0 (0%)  | 16 (100%)        | 0 (0%)  | 0 (0%)    | 0 (0%)    | 0 (0%)  | 0 (0%)  |
| Fatigue                   | 17 (100%)                 | 0 (0%)  | 0 (0%)     | 0 (0%)    | 0 (0%)  | 0 (0%)  | 16 (100%)      | 0 (0%)  | 0 (0%)    | 0 (0%)     | 0 (0%)    | 0 (0%)  | 15 (93.75%)      | 0 (0%)  | 1 (6.25%) | 0 (0%)    | 0 (0%)  | 0 (0%)  |
| Fever                     | 17 (100%)                 | 0 (0%)  | 0 (0%)     | 0 (0%)    | 0 (0%)  | 0 (0%)  | 16 (100%)      | 0 (0%)  | 0 (0%)    | 0 (0%)     | 0 (0%)    | 0 (0%)  | 16 (100%)        | 0 (0%)  | 0 (0%)    | 0 (0%)    | 0 (0%)  | 0 (0%)  |
| Feverish                  | 16 (94.12%)               | 0 (0%)  | 1 (5.88%)  | 0 (0%)    | 0 (0%)  | 0 (0%)  | 16 (100%)      | 0 (0%)  | 0 (0%)    | 0 (0%)     | 0 (0%)    | 0 (0%)  | 15 (93.75%)      | 0 (0%)  | 1 (6.25%) | 0 (0%)    | 0 (0%)  | 0 (0%)  |
| Gastritis                 | 17 (100%)                 | 0 (0%)  | 0 (0%)     | 0 (0%)    | 0 (0%)  | 0 (0%)  | 16 (100%)      | 0 (0%)  | 0 (0%)    | 0 (0%)     | 0 (0%)    | 0 (0%)  | 15 (93.75%)      | 0 (0%)  | 1 (6.25%) | 0 (0%)    | 0 (0%)  | 0 (0%)  |
| Headache                  | 16 (94.12%)               | 0 (0%)  | 0 (0%)     | 1 (5.88%) | 0 (0%)  | 0 (0%)  | 14 (87.5%)     | 0 (0%)  | 2 (12.5%) | 0 (0%)     | 0 (0%)    | 0 (0%)  | 16 (100%)        | 0 (0%)  | 0 (0%)    | 0 (0%)    | 0 (0%)  | 0 (0%)  |
| Hematuria                 | 16 (94.12%)               | 0 (0%)  | 1 (5.88%)  | 0 (0%)    | 0 (0%)  | 0 (0%)  | 13 (81.25%)    | 0 (0%)  | 1 (6.25%) | 0 (0%)     | 2 (12.5%) | 0 (0%)  | 15 (93.75%)      | 0 (0%)  | 1 (6.25%) | 0 (0%)    | 0 (0%)  | 0 (0%)  |
| Hemoglobin decreased      | 12 (70.59%)               | 0 (0%)  | 4 (23.53%) | 1 (5.88%) | 0 (0%)  | 0 (0%)  | 11 (68.75%)    | 0 (0%)  | 2 (12.5%) | 3 (18.75%) | 0 (0%)    | 0 (0%)  | 13 (81.25%)      | 0 (0%)  | 2 (12.5%) | 1 (6.25%) | 0 (0%)  | 0 (0%)  |
| Hyperglycemia             | 16 (94.12%)               | 0 (0%)  | 0 (0%)     | 1 (5.88%) | 0 (0%)  | 0 (0%)  | 14 (87.5%)     | 0 (0%)  | 0 (0%)    | 2 (12.5%)  | 0 (0%)    | 0 (0%)  | 14 (87.5%)       | 0 (0%)  | 0 (0%)    | 2 (12.5%) | 0 (0%)  | 0 (0%)  |

| Event                     | AGS-V + Adjuvant (N = 17) |         |            |           |            |         | AGS-V (N = 16) |         |           |            |           |         | Placebo (N = 16) |         |           |           |           |         |
|---------------------------|---------------------------|---------|------------|-----------|------------|---------|----------------|---------|-----------|------------|-----------|---------|------------------|---------|-----------|-----------|-----------|---------|
|                           | No Sx                     | Grade 0 | Grade 1    | Grade 2   | Grade 3    | Grade 4 | No Sx          | Grade 0 | Grade 1   | Grade 2    | Grade 3   | Grade 4 | No Sx            | Grade 0 | Grade 1   | Grade 2   | Grade 3   | Grade 4 |
| Hypnatremia               | 14 (82.35%)               | 0 (0%)  | 2 (11.76%) | 1 (5.88%) | 0 (0%)     | 0 (0%)  | 13 (81.25%)    | 0 (0%)  | 2 (12.5%) | 0 (0%)     | 1 (6.25%) | 0 (0%)  | 14 (87.5%)       | 0 (0%)  | 2 (12.5%) | 0 (0%)    | 0 (0%)    | 0 (0%)  |
| Hypertension              | 16 (94.12%)               | 0 (0%)  | 1 (5.88%)  | 0 (0%)    | 0 (0%)     | 0 (0%)  | 16 (100%)      | 0 (0%)  | 0 (0%)    | 0 (0%)     | 0 (0%)    | 0 (0%)  | 16 (100%)        | 0 (0%)  | 0 (0%)    | 0 (0%)    | 0 (0%)    | 0 (0%)  |
| Hypocalcemia              | 16 (94.12%)               | 0 (0%)  | 1 (5.88%)  | 0 (0%)    | 0 (0%)     | 0 (0%)  | 15 (93.75%)    | 0 (0%)  | 1 (6.25%) | 0 (0%)     | 0 (0%)    | 0 (0%)  | 16 (100%)        | 0 (0%)  | 0 (0%)    | 0 (0%)    | 0 (0%)    | 0 (0%)  |
| Hypoglycemia              | 14 (82.35%)               | 0 (0%)  | 1 (5.88%)  | 0 (0%)    | 2 (11.76%) | 0 (0%)  | 14 (87.5%)     | 0 (0%)  | 2 (12.5%) | 0 (0%)     | 0 (0%)    | 0 (0%)  | 13 (81.25%)      | 0 (0%)  | 1 (6.25%) | 1 (6.25%) | 1 (6.25%) | 0 (0%)  |
| Hypokalemia               | 17 (100%)                 | 0 (0%)  | 0 (0%)     | 0 (0%)    | 0 (0%)     | 0 (0%)  | 14 (87.5%)     | 0 (0%)  | 1 (6.25%) | 1 (6.25%)  | 0 (0%)    | 0 (0%)  | 14 (87.5%)       | 0 (0%)  | 1 (6.25%) | 1 (6.25%) | 0 (0%)    | 0 (0%)  |
| Hyponatremia              | 17 (100%)                 | 0 (0%)  | 0 (0%)     | 0 (0%)    | 0 (0%)     | 0 (0%)  | 16 (100%)      | 0 (0%)  | 0 (0%)    | 0 (0%)     | 0 (0%)    | 0 (0%)  | 16 (100%)        | 0 (0%)  | 0 (0%)    | 0 (0%)    | 0 (0%)    | 0 (0%)  |
| Hypophosphatemia          | 16 (94.12%)               | 0 (0%)  | 0 (0%)     | 1 (5.88%) | 0 (0%)     | 0 (0%)  | 12 (75%)       | 0 (0%)  | 1 (6.25%) | 3 (18.75%) | 0 (0%)    | 0 (0%)  | 15 (93.75%)      | 0 (0%)  | 0 (0%)    | 1 (6.25%) | 0 (0%)    | 0 (0%)  |
| Influenza                 | 17 (100%)                 | 0 (0%)  | 0 (0%)     | 0 (0%)    | 0 (0%)     | 0 (0%)  | 16 (100%)      | 0 (0%)  | 0 (0%)    | 0 (0%)     | 0 (0%)    | 0 (0%)  | 16 (100%)        | 0 (0%)  | 0 (0%)    | 0 (0%)    | 0 (0%)    | 0 (0%)  |
| Injection site erythema   | 17 (100%)                 | 0 (0%)  | 0 (0%)     | 0 (0%)    | 0 (0%)     | 0 (0%)  | 16 (100%)      | 0 (0%)  | 0 (0%)    | 0 (0%)     | 0 (0%)    | 0 (0%)  | 16 (100%)        | 0 (0%)  | 0 (0%)    | 0 (0%)    | 0 (0%)    | 0 (0%)  |
| Injection site induration | 17 (100%)                 | 0 (0%)  | 0 (0%)     | 0 (0%)    | 0 (0%)     | 0 (0%)  | 16 (100%)      | 0 (0%)  | 0 (0%)    | 0 (0%)     | 0 (0%)    | 0 (0%)  | 16 (100%)        | 0 (0%)  | 0 (0%)    | 0 (0%)    | 0 (0%)    | 0 (0%)  |
| Injection site itching    | 17 (100%)                 | 0 (0%)  | 0 (0%)     | 0 (0%)    | 0 (0%)     | 0 (0%)  | 16 (100%)      | 0 (0%)  | 0 (0%)    | 0 (0%)     | 0 (0%)    | 0 (0%)  | 16 (100%)        | 0 (0%)  | 0 (0%)    | 0 (0%)    | 0 (0%)    | 0 (0%)  |
| Injection site pain       | 17 (100%)                 | 0 (0%)  | 0 (0%)     | 0 (0%)    | 0 (0%)     | 0 (0%)  | 16 (100%)      | 0 (0%)  | 0 (0%)    | 0 (0%)     | 0 (0%)    | 0 (0%)  | 16 (100%)        | 0 (0%)  | 0 (0%)    | 0 (0%)    | 0 (0%)    | 0 (0%)  |
| Injection site pruritus   | 17 (100%)                 | 0 (0%)  | 0 (0%)     | 0 (0%)    | 0 (0%)     | 0 (0%)  | 16 (100%)      | 0 (0%)  | 0 (0%)    | 0 (0%)     | 0 (0%)    | 0 (0%)  | 16 (100%)        | 0 (0%)  | 0 (0%)    | 0 (0%)    | 0 (0%)    | 0 (0%)  |
| Injection site swelling   | 17 (100%)                 | 0 (0%)  | 0 (0%)     | 0 (0%)    | 0 (0%)     | 0 (0%)  | 16 (100%)      | 0 (0%)  | 0 (0%)    | 0 (0%)     | 0 (0%)    | 0 (0%)  | 16 (100%)        | 0 (0%)  | 0 (0%)    | 0 (0%)    | 0 (0%)    | 0 (0%)  |
| Injury                    | 17 (100%)                 | 0 (0%)  | 0 (0%)     | 0 (0%)    | 0 (0%)     | 0 (0%)  | 15 (93.75%)    | 0 (0%)  | 1 (6.25%) | 0 (0%)     | 0 (0%)    | 0 (0%)  | 16 (100%)        | 0 (0%)  | 0 (0%)    | 0 (0%)    | 0 (0%)    | 0 (0%)  |
| Insect bite               | 17 (100%)                 | 0 (0%)  | 0 (0%)     | 0 (0%)    | 0 (0%)     | 0 (0%)  | 16 (100%)      | 0 (0%)  | 0 (0%)    | 0 (0%)     | 0 (0%)    | 0 (0%)  | 15 (93.75%)      | 0 (0%)  | 1 (6.25%) | 0 (0%)    | 0 (0%)    | 0 (0%)  |
| Iron deficiency anemia    | 17 (100%)                 | 0 (0%)  | 0 (0%)     | 0 (0%)    | 0 (0%)     | 0 (0%)  | 15 (93.75%)    | 0 (0%)  | 0 (0%)    | 1 (6.25%)  | 0 (0%)    | 0 (0%)  | 16 (100%)        | 0 (0%)  | 0 (0%)    | 0 (0%)    | 0 (0%)    | 0 (0%)  |
| Knee pain                 | 16 (94.12%)               | 0 (0%)  | 1 (5.88%)  | 0 (0%)    | 0 (0%)     | 0 (0%)  | 16 (100%)      | 0 (0%)  | 0 (0%)    | 0 (0%)     | 0 (0%)    | 0 (0%)  | 16 (100%)        | 0 (0%)  | 0 (0%)    | 0 (0%)    | 0 (0%)    | 0 (0%)  |
| Laryngitis                | 17 (100%)                 | 0 (0%)  | 0 (0%)     | 0 (0%)    | 0 (0%)     | 0 (0%)  | 16 (100%)      | 0 (0%)  | 0 (0%)    | 0 (0%)     | 0 (0%)    | 0 (0%)  | 15 (93.75%)      | 0 (0%)  | 1 (6.25%) | 0 (0%)    | 0 (0%)    | 0 (0%)  |
| Local swelling            | 17 (100%)                 | 0 (0%)  | 0 (0%)     | 0 (0%)    | 0 (0%)     | 0 (0%)  | 16 (100%)      | 0 (0%)  | 0 (0%)    | 0 (0%)     | 0 (0%)    | 0 (0%)  | 16 (100%)        | 0 (0%)  | 0 (0%)    | 0 (0%)    | 0 (0%)    | 0 (0%)  |
| Lymph node tenderness     | 16 (94.12%)               | 0 (0%)  | 1 (5.88%)  | 0 (0%)    | 0 (0%)     | 0 (0%)  | 16 (100%)      | 0 (0%)  | 0 (0%)    | 0 (0%)     | 0 (0%)    | 0 (0%)  | 16 (100%)        | 0 (0%)  | 0 (0%)    | 0 (0%)    | 0 (0%)    | 0 (0%)  |

| Event                      | AGS-V + Adjuvant (N = 17) |         |           |           |         |         | AGS-V (N = 16) |         |           |           |         |         | Placebo (N = 16) |         |           |         |           |         |
|----------------------------|---------------------------|---------|-----------|-----------|---------|---------|----------------|---------|-----------|-----------|---------|---------|------------------|---------|-----------|---------|-----------|---------|
|                            | No Sx                     | Grade 0 | Grade 1   | Grade 2   | Grade 3 | Grade 4 | No Sx          | Grade 0 | Grade 1   | Grade 2   | Grade 3 | Grade 4 | No Sx            | Grade 0 | Grade 1   | Grade 2 | Grade 3   | Grade 4 |
| Lymphocyte count increased | 16 (94.12%)               | 0 (0%)  | 1 (5.88%) | 0 (0%)    | 0 (0%)  | 0 (0%)  | 16 (100%)      | 0 (0%)  | 0 (0%)    | 0 (0%)    | 0 (0%)  | 0 (0%)  | 16 (100%)        | 0 (0%)  | 0 (0%)    | 0 (0%)  | 0 (0%)    | 0 (0%)  |
| Muscle ache                | 17 (100%)                 | 0 (0%)  | 0 (0%)    | 0 (0%)    | 0 (0%)  | 0 (0%)  | 16 (100%)      | 0 (0%)  | 0 (0%)    | 0 (0%)    | 0 (0%)  | 0 (0%)  | 16 (100%)        | 0 (0%)  | 0 (0%)    | 0 (0%)  | 0 (0%)    | 0 (0%)  |
| Muscle strain              | 16 (94.12%)               | 0 (0%)  | 1 (5.88%) | 0 (0%)    | 0 (0%)  | 0 (0%)  | 16 (100%)      | 0 (0%)  | 0 (0%)    | 0 (0%)    | 0 (0%)  | 0 (0%)  | 16 (100%)        | 0 (0%)  | 0 (0%)    | 0 (0%)  | 0 (0%)    | 0 (0%)  |
| Myalgia                    | 17 (100%)                 | 0 (0%)  | 0 (0%)    | 0 (0%)    | 0 (0%)  | 0 (0%)  | 16 (100%)      | 0 (0%)  | 0 (0%)    | 0 (0%)    | 0 (0%)  | 0 (0%)  | 15 (93.75%)      | 0 (0%)  | 1 (6.25%) | 0 (0%)  | 0 (0%)    | 0 (0%)  |
| Nasal congestion           | 17 (100%)                 | 0 (0%)  | 0 (0%)    | 0 (0%)    | 0 (0%)  | 0 (0%)  | 15 (93.75%)    | 0 (0%)  | 1 (6.25%) | 0 (0%)    | 0 (0%)  | 0 (0%)  | 15 (93.75%)      | 0 (0%)  | 1 (6.25%) | 0 (0%)  | 0 (0%)    | 0 (0%)  |
| Nausea                     | 17 (100%)                 | 0 (0%)  | 0 (0%)    | 0 (0%)    | 0 (0%)  | 0 (0%)  | 16 (100%)      | 0 (0%)  | 0 (0%)    | 0 (0%)    | 0 (0%)  | 0 (0%)  | 15 (93.75%)      | 0 (0%)  | 1 (6.25%) | 0 (0%)  | 0 (0%)    | 0 (0%)  |
| Neutrophil count decreased | 16 (94.12%)               | 0 (0%)  | 1 (5.88%) | 0 (0%)    | 0 (0%)  | 0 (0%)  | 13 (81.25%)    | 0 (0%)  | 2 (12.5%) | 1 (6.25%) | 0 (0%)  | 0 (0%)  | 14 (87.5%)       | 0 (0%)  | 2 (12.5%) | 0 (0%)  | 0 (0%)    | 0 (0%)  |
| Oral pain                  | 16 (94.12%)               | 0 (0%)  | 0 (0%)    | 1 (5.88%) | 0 (0%)  | 0 (0%)  | 16 (100%)      | 0 (0%)  | 0 (0%)    | 0 (0%)    | 0 (0%)  | 0 (0%)  | 16 (100%)        | 0 (0%)  | 0 (0%)    | 0 (0%)  | 0 (0%)    | 0 (0%)  |
| Peripheral neuropathy      | 17 (100%)                 | 0 (0%)  | 0 (0%)    | 0 (0%)    | 0 (0%)  | 0 (0%)  | 16 (100%)      | 0 (0%)  | 0 (0%)    | 0 (0%)    | 0 (0%)  | 0 (0%)  | 16 (100%)        | 0 (0%)  | 0 (0%)    | 0 (0%)  | 0 (0%)    | 0 (0%)  |
| Productive cough           | 16 (94.12%)               | 0 (0%)  | 1 (5.88%) | 0 (0%)    | 0 (0%)  | 0 (0%)  | 16 (100%)      | 0 (0%)  | 0 (0%)    | 0 (0%)    | 0 (0%)  | 0 (0%)  | 16 (100%)        | 0 (0%)  | 0 (0%)    | 0 (0%)  | 0 (0%)    | 0 (0%)  |
| Pruritic rash              | 17 (100%)                 | 0 (0%)  | 0 (0%)    | 0 (0%)    | 0 (0%)  | 0 (0%)  | 16 (100%)      | 0 (0%)  | 0 (0%)    | 0 (0%)    | 0 (0%)  | 0 (0%)  | 16 (100%)        | 0 (0%)  | 0 (0%)    | 0 (0%)  | 0 (0%)    | 0 (0%)  |
| Pruritus                   | 17 (100%)                 | 0 (0%)  | 0 (0%)    | 0 (0%)    | 0 (0%)  | 0 (0%)  | 16 (100%)      | 0 (0%)  | 0 (0%)    | 0 (0%)    | 0 (0%)  | 0 (0%)  | 16 (100%)        | 0 (0%)  | 0 (0%)    | 0 (0%)  | 0 (0%)    | 0 (0%)  |
| Rash                       | 17 (100%)                 | 0 (0%)  | 0 (0%)    | 0 (0%)    | 0 (0%)  | 0 (0%)  | 16 (100%)      | 0 (0%)  | 0 (0%)    | 0 (0%)    | 0 (0%)  | 0 (0%)  | 15 (93.75%)      | 0 (0%)  | 0 (0%)    | 0 (0%)  | 1 (6.25%) | 0 (0%)  |
| Rhinorrhea                 | 16 (94.12%)               | 0 (0%)  | 1 (5.88%) | 0 (0%)    | 0 (0%)  | 0 (0%)  | 16 (100%)      | 0 (0%)  | 0 (0%)    | 0 (0%)    | 0 (0%)  | 0 (0%)  | 15 (93.75%)      | 0 (0%)  | 1 (6.25%) | 0 (0%)  | 0 (0%)    | 0 (0%)  |
| Sinusitis                  | 16 (94.12%)               | 0 (0%)  | 0 (0%)    | 1 (5.88%) | 0 (0%)  | 0 (0%)  | 16 (100%)      | 0 (0%)  | 0 (0%)    | 0 (0%)    | 0 (0%)  | 0 (0%)  | 16 (100%)        | 0 (0%)  | 0 (0%)    | 0 (0%)  | 0 (0%)    | 0 (0%)  |
| Skin hyperpigmentation     | 17 (100%)                 | 0 (0%)  | 0 (0%)    | 0 (0%)    | 0 (0%)  | 0 (0%)  | 16 (100%)      | 0 (0%)  | 0 (0%)    | 0 (0%)    | 0 (0%)  | 0 (0%)  | 16 (100%)        | 0 (0%)  | 0 (0%)    | 0 (0%)  | 0 (0%)    | 0 (0%)  |
| Skin induration            | 17 (100%)                 | 0 (0%)  | 0 (0%)    | 0 (0%)    | 0 (0%)  | 0 (0%)  | 16 (100%)      | 0 (0%)  | 0 (0%)    | 0 (0%)    | 0 (0%)  | 0 (0%)  | 16 (100%)        | 0 (0%)  | 0 (0%)    | 0 (0%)  | 0 (0%)    | 0 (0%)  |
| Sore throat                | 15 (88.24%)               | 0 (0%)  | 1 (5.88%) | 1 (5.88%) | 0 (0%)  | 0 (0%)  | 16 (100%)      | 0 (0%)  | 0 (0%)    | 0 (0%)    | 0 (0%)  | 0 (0%)  | 15 (93.75%)      | 0 (0%)  | 1 (6.25%) | 0 (0%)  | 0 (0%)    | 0 (0%)  |
| Systolic hypertension      | 17 (100%)                 | 0 (0%)  | 0 (0%)    | 0 (0%)    | 0 (0%)  | 0 (0%)  | 15 (93.75%)    | 0 (0%)  | 1 (6.25%) | 0 (0%)    | 0 (0%)  | 0 (0%)  | 16 (100%)        | 0 (0%)  | 0 (0%)    | 0 (0%)  | 0 (0%)    | 0 (0%)  |
| Tenderness                 | 17 (100%)                 | 0 (0%)  | 0 (0%)    | 0 (0%)    | 0 (0%)  | 0 (0%)  | 16 (100%)      | 0 (0%)  | 0 (0%)    | 0 (0%)    | 0 (0%)  | 0 (0%)  | 16 (100%)        | 0 (0%)  | 0 (0%)    | 0 (0%)  | 0 (0%)    | 0 (0%)  |
| Tooth extraction           | 16 (94.12%)               | 0 (0%)  | 0 (0%)    | 1 (5.88%) | 0 (0%)  | 0 (0%)  | 16 (100%)      | 0 (0%)  | 0 (0%)    | 0 (0%)    | 0 (0%)  | 0 (0%)  | 16 (100%)        | 0 (0%)  | 0 (0%)    | 0 (0%)  | 0 (0%)    | 0 (0%)  |

| Event                             | AGS-V + Adjuvant (N = 17) |         |              |         |              |         | AGS-V (N = 16) |         |              |         |              |         | Placebo (N = 16) |         |              |              |         |         |
|-----------------------------------|---------------------------|---------|--------------|---------|--------------|---------|----------------|---------|--------------|---------|--------------|---------|------------------|---------|--------------|--------------|---------|---------|
|                                   | No Sx                     | Grade 0 | Grade 1      | Grade 2 | Grade 3      | Grade 4 | No Sx          | Grade 0 | Grade 1      | Grade 2 | Grade 3      | Grade 4 | No Sx            | Grade 0 | Grade 1      | Grade 2      | Grade 3 | Grade 4 |
| Torn bicep tendon                 | 16<br>(94.12%)            | 0 (0%)  | 0 (0%)       | 0 (0%)  | 1<br>(5.88%) | 0 (0%)  | 16<br>(100%)   | 0 (0%)  | 0 (0%)       | 0 (0%)  | 0 (0%)       | 0 (0%)  | 16<br>(100%)     | 0 (0%)  | 0 (0%)       | 0 (0%)       | 0 (0%)  | 0 (0%)  |
| Upper respiratory tract infection | 17<br>(100%)              | 0 (0%)  | 0 (0%)       | 0 (0%)  | 0 (0%)       | 0 (0%)  | 15<br>(93.75%) | 0 (0%)  | 1<br>(6.25%) | 0 (0%)  | 0 (0%)       | 0 (0%)  | 16<br>(100%)     | 0 (0%)  | 0 (0%)       | 0 (0%)       | 0 (0%)  | 0 (0%)  |
| Urinary frequency                 | 17<br>(100%)              | 0 (0%)  | 0 (0%)       | 0 (0%)  | 0 (0%)       | 0 (0%)  | 16<br>(100%)   | 0 (0%)  | 0 (0%)       | 0 (0%)  | 0 (0%)       | 0 (0%)  | 16<br>(100%)     | 0 (0%)  | 0 (0%)       | 0 (0%)       | 0 (0%)  | 0 (0%)  |
| Urinary tract infection           | 17<br>(100%)              | 0 (0%)  | 0 (0%)       | 0 (0%)  | 0 (0%)       | 0 (0%)  | 15<br>(93.75%) | 0 (0%)  | 0 (0%)       | 0 (0%)  | 1<br>(6.25%) | 0 (0%)  | 16<br>(100%)     | 0 (0%)  | 0 (0%)       | 0 (0%)       | 0 (0%)  | 0 (0%)  |
| Urine WBC increased               | 17<br>(100%)              | 0 (0%)  | 0 (0%)       | 0 (0%)  | 0 (0%)       | 0 (0%)  | 14<br>(87.5%)  | 0 (0%)  | 2<br>(12.5%) | 0 (0%)  | 0 (0%)       | 0 (0%)  | 16<br>(100%)     | 0 (0%)  | 0 (0%)       | 0 (0%)       | 0 (0%)  | 0 (0%)  |
| Urticaria                         | 17<br>(100%)              | 0 (0%)  | 0 (0%)       | 0 (0%)  | 0 (0%)       | 0 (0%)  | 16<br>(100%)   | 0 (0%)  | 0 (0%)       | 0 (0%)  | 0 (0%)       | 0 (0%)  | 16<br>(100%)     | 0 (0%)  | 0 (0%)       | 0 (0%)       | 0 (0%)  | 0 (0%)  |
| Vertigo                           | 17<br>(100%)              | 0 (0%)  | 0 (0%)       | 0 (0%)  | 0 (0%)       | 0 (0%)  | 16<br>(100%)   | 0 (0%)  | 0 (0%)       | 0 (0%)  | 0 (0%)       | 0 (0%)  | 16<br>(100%)     | 0 (0%)  | 0 (0%)       | 0 (0%)       | 0 (0%)  | 0 (0%)  |
| Vitamin D deficiency              | 16<br>(94.12%)            | 0 (0%)  | 1<br>(5.88%) | 0 (0%)  | 0 (0%)       | 0 (0%)  | 16<br>(100%)   | 0 (0%)  | 0 (0%)       | 0 (0%)  | 0 (0%)       | 0 (0%)  | 16<br>(100%)     | 0 (0%)  | 0 (0%)       | 0 (0%)       | 0 (0%)  | 0 (0%)  |
| Vomiting                          | 17<br>(100%)              | 0 (0%)  | 0 (0%)       | 0 (0%)  | 0 (0%)       | 0 (0%)  | 16<br>(100%)   | 0 (0%)  | 0 (0%)       | 0 (0%)  | 0 (0%)       | 0 (0%)  | 16<br>(100%)     | 0 (0%)  | 0 (0%)       | 0 (0%)       | 0 (0%)  | 0 (0%)  |
| WBC decreased                     | 17<br>(100%)              | 0 (0%)  | 0 (0%)       | 0 (0%)  | 0 (0%)       | 0 (0%)  | 16<br>(100%)   | 0 (0%)  | 0 (0%)       | 0 (0%)  | 0 (0%)       | 0 (0%)  | 15<br>(93.75%)   | 0 (0%)  | 0 (0%)       | 1<br>(6.25%) | 0 (0%)  | 0 (0%)  |
| WBC increased                     | 17<br>(100%)              | 0 (0%)  | 0 (0%)       | 0 (0%)  | 0 (0%)       | 0 (0%)  | 14<br>(87.5%)  | 0 (0%)  | 2<br>(12.5%) | 0 (0%)  | 0 (0%)       | 0 (0%)  | 15<br>(93.75%)   | 0 (0%)  | 1<br>(6.25%) | 0 (0%)       | 0 (0%)  | 0 (0%)  |

**Table 9 : Occurrence of Max Grade Events Per Subject which are Unlikely Related to Treatment by Treatment**

| Event                                | Adjuvant + AGS-V (N = 17) |         |              |         |         |         | AGS-V (N = 16) |         |              |         |         |         | Placebo (N = 16) |         |              |         |         |         |
|--------------------------------------|---------------------------|---------|--------------|---------|---------|---------|----------------|---------|--------------|---------|---------|---------|------------------|---------|--------------|---------|---------|---------|
|                                      | No Sx                     | Grade 0 | Grade 1      | Grade 2 | Grade 3 | Grade 4 | No Sx          | Grade 0 | Grade 1      | Grade 2 | Grade 3 | Grade 4 | No Sx            | Grade 0 | Grade 1      | Grade 2 | Grade 3 | Grade 4 |
| Abdominal cramps                     | 17<br>(100%)              | 0 (0%)  | 0 (0%)       | 0 (0%)  | 0 (0%)  | 0 (0%)  | 16<br>(100%)   | 0 (0%)  | 0 (0%)       | 0 (0%)  | 0 (0%)  | 0 (0%)  | 16<br>(100%)     | 0 (0%)  | 0 (0%)       | 0 (0%)  | 0 (0%)  | 0 (0%)  |
| Abdominal pain                       | 16<br>(94.12%)            | 0 (0%)  | 1<br>(5.88%) | 0 (0%)  | 0 (0%)  | 0 (0%)  | 15<br>(93.75%) | 0 (0%)  | 1<br>(6.25%) | 0 (0%)  | 0 (0%)  | 0 (0%)  | 16<br>(100%)     | 0 (0%)  | 0 (0%)       | 0 (0%)  | 0 (0%)  | 0 (0%)  |
| Absolute neutrophil count, decreased | 16<br>(94.12%)            | 0 (0%)  | 1<br>(5.88%) | 0 (0%)  | 0 (0%)  | 0 (0%)  | 16<br>(100%)   | 0 (0%)  | 0 (0%)       | 0 (0%)  | 0 (0%)  | 0 (0%)  | 16<br>(100%)     | 0 (0%)  | 0 (0%)       | 0 (0%)  | 0 (0%)  | 0 (0%)  |
| Acute sinusitis                      | 17<br>(100%)              | 0 (0%)  | 0 (0%)       | 0 (0%)  | 0 (0%)  | 0 (0%)  | 16<br>(100%)   | 0 (0%)  | 0 (0%)       | 0 (0%)  | 0 (0%)  | 0 (0%)  | 15<br>(93.75%)   | 0 (0%)  | 1<br>(6.25%) | 0 (0%)  | 0 (0%)  | 0 (0%)  |

| Event                       | Adjuvant + AGS-V (N = 17) |         |           |           |           |         | AGS-V (N = 16) |         |         |         |         |           | Placebo (N = 16) |         |           |           |           |         |
|-----------------------------|---------------------------|---------|-----------|-----------|-----------|---------|----------------|---------|---------|---------|---------|-----------|------------------|---------|-----------|-----------|-----------|---------|
|                             | No Sx                     | Grade 0 | Grade 1   | Grade 2   | Grade 3   | Grade 4 | No Sx          | Grade 0 | Grade 1 | Grade 2 | Grade 3 | Grade 4   | No Sx            | Grade 0 | Grade 1   | Grade 2   | Grade 3   | Grade 4 |
| ALT increased               | 17 (100%)                 | 0 (0%)  | 0 (0%)    | 0 (0%)    | 0 (0%)    | 0 (0%)  | 16 (100%)      | 0 (0%)  | 0 (0%)  | 0 (0%)  | 0 (0%)  | 0 (0%)    | 16 (100%)        | 0 (0%)  | 0 (0%)    | 0 (0%)    | 0 (0%)    | 0 (0%)  |
| Anxiety                     | 17 (100%)                 | 0 (0%)  | 0 (0%)    | 0 (0%)    | 0 (0%)    | 0 (0%)  | 16 (100%)      | 0 (0%)  | 0 (0%)  | 0 (0%)  | 0 (0%)  | 0 (0%)    | 16 (100%)        | 0 (0%)  | 0 (0%)    | 0 (0%)    | 0 (0%)    | 0 (0%)  |
| Arthralgia                  | 17 (100%)                 | 0 (0%)  | 0 (0%)    | 0 (0%)    | 0 (0%)    | 0 (0%)  | 16 (100%)      | 0 (0%)  | 0 (0%)  | 0 (0%)  | 0 (0%)  | 0 (0%)    | 16 (100%)        | 0 (0%)  | 0 (0%)    | 0 (0%)    | 0 (0%)    | 0 (0%)  |
| AST increased               | 17 (100%)                 | 0 (0%)  | 0 (0%)    | 0 (0%)    | 0 (0%)    | 0 (0%)  | 16 (100%)      | 0 (0%)  | 0 (0%)  | 0 (0%)  | 0 (0%)  | 0 (0%)    | 16 (100%)        | 0 (0%)  | 0 (0%)    | 0 (0%)    | 0 (0%)    | 0 (0%)  |
| Bilirubin total high        | 17 (100%)                 | 0 (0%)  | 0 (0%)    | 0 (0%)    | 0 (0%)    | 0 (0%)  | 16 (100%)      | 0 (0%)  | 0 (0%)  | 0 (0%)  | 0 (0%)  | 0 (0%)    | 16 (100%)        | 0 (0%)  | 0 (0%)    | 0 (0%)    | 0 (0%)    | 0 (0%)  |
| Blood eosinophils increased | 17 (100%)                 | 0 (0%)  | 0 (0%)    | 0 (0%)    | 0 (0%)    | 0 (0%)  | 16 (100%)      | 0 (0%)  | 0 (0%)  | 0 (0%)  | 0 (0%)  | 0 (0%)    | 16 (100%)        | 0 (0%)  | 0 (0%)    | 0 (0%)    | 0 (0%)    | 0 (0%)  |
| Bradycardia                 | 17 (100%)                 | 0 (0%)  | 0 (0%)    | 0 (0%)    | 0 (0%)    | 0 (0%)  | 16 (100%)      | 0 (0%)  | 0 (0%)  | 0 (0%)  | 0 (0%)  | 0 (0%)    | 16 (100%)        | 0 (0%)  | 0 (0%)    | 0 (0%)    | 0 (0%)    | 0 (0%)  |
| BUN increased               | 16 (94.12%)               | 0 (0%)  | 1 (5.88%) | 0 (0%)    | 0 (0%)    | 0 (0%)  | 16 (100%)      | 0 (0%)  | 0 (0%)  | 0 (0%)  | 0 (0%)  | 0 (0%)    | 16 (100%)        | 0 (0%)  | 0 (0%)    | 0 (0%)    | 0 (0%)    | 0 (0%)  |
| Campylobacter               | 17 (100%)                 | 0 (0%)  | 0 (0%)    | 0 (0%)    | 0 (0%)    | 0 (0%)  | 16 (100%)      | 0 (0%)  | 0 (0%)  | 0 (0%)  | 0 (0%)  | 0 (0%)    | 16 (100%)        | 0 (0%)  | 0 (0%)    | 0 (0%)    | 0 (0%)    | 0 (0%)  |
| Candida vaginitis           | 17 (100%)                 | 0 (0%)  | 0 (0%)    | 0 (0%)    | 0 (0%)    | 0 (0%)  | 16 (100%)      | 0 (0%)  | 0 (0%)  | 0 (0%)  | 0 (0%)  | 0 (0%)    | 14 (87.5%)       | 0 (0%)  | 2 (12.5%) | 0 (0%)    | 0 (0%)    | 0 (0%)  |
| Chills                      | 17 (100%)                 | 0 (0%)  | 0 (0%)    | 0 (0%)    | 0 (0%)    | 0 (0%)  | 16 (100%)      | 0 (0%)  | 0 (0%)  | 0 (0%)  | 0 (0%)  | 0 (0%)    | 15 (93.75%)      | 0 (0%)  | 1 (6.25%) | 0 (0%)    | 0 (0%)    | 0 (0%)  |
| Common cold                 | 16 (94.12%)               | 0 (0%)  | 1 (5.88%) | 0 (0%)    | 0 (0%)    | 0 (0%)  | 16 (100%)      | 0 (0%)  | 0 (0%)  | 0 (0%)  | 0 (0%)  | 0 (0%)    | 16 (100%)        | 0 (0%)  | 0 (0%)    | 0 (0%)    | 0 (0%)    | 0 (0%)  |
| Constipation                | 17 (100%)                 | 0 (0%)  | 0 (0%)    | 0 (0%)    | 0 (0%)    | 0 (0%)  | 16 (100%)      | 0 (0%)  | 0 (0%)  | 0 (0%)  | 0 (0%)  | 0 (0%)    | 16 (100%)        | 0 (0%)  | 0 (0%)    | 0 (0%)    | 0 (0%)    | 0 (0%)  |
| Coryza                      | 17 (100%)                 | 0 (0%)  | 0 (0%)    | 0 (0%)    | 0 (0%)    | 0 (0%)  | 16 (100%)      | 0 (0%)  | 0 (0%)  | 0 (0%)  | 0 (0%)  | 0 (0%)    | 16 (100%)        | 0 (0%)  | 0 (0%)    | 0 (0%)    | 0 (0%)    | 0 (0%)  |
| CPK increased               | 16 (94.12%)               | 0 (0%)  | 0 (0%)    | 1 (5.88%) | 0 (0%)    | 0 (0%)  | 15 (93.75%)    | 0 (0%)  | 0 (0%)  | 0 (0%)  | 0 (0%)  | 1 (6.25%) | 15 (93.75%)      | 0 (0%)  | 0 (0%)    | 1 (6.25%) | 0 (0%)    | 0 (0%)  |
| Creatine kinase             | 17 (100%)                 | 0 (0%)  | 0 (0%)    | 0 (0%)    | 0 (0%)    | 0 (0%)  | 16 (100%)      | 0 (0%)  | 0 (0%)  | 0 (0%)  | 0 (0%)  | 0 (0%)    | 15 (93.75%)      | 0 (0%)  | 0 (0%)    | 1 (6.25%) | 0 (0%)    | 0 (0%)  |
| Creatine kinase high        | 17 (100%)                 | 0 (0%)  | 0 (0%)    | 0 (0%)    | 0 (0%)    | 0 (0%)  | 16 (100%)      | 0 (0%)  | 0 (0%)  | 0 (0%)  | 0 (0%)  | 0 (0%)    | 15 (93.75%)      | 0 (0%)  | 0 (0%)    | 0 (0%)    | 1 (6.25%) | 0 (0%)  |
| Creatinine increased        | 17 (100%)                 | 0 (0%)  | 0 (0%)    | 0 (0%)    | 0 (0%)    | 0 (0%)  | 16 (100%)      | 0 (0%)  | 0 (0%)  | 0 (0%)  | 0 (0%)  | 0 (0%)    | 16 (100%)        | 0 (0%)  | 0 (0%)    | 0 (0%)    | 0 (0%)    | 0 (0%)  |
| Dermatitis                  | 16 (94.12%)               | 0 (0%)  | 0 (0%)    | 0 (0%)    | 1 (5.88%) | 0 (0%)  | 16 (100%)      | 0 (0%)  | 0 (0%)  | 0 (0%)  | 0 (0%)  | 0 (0%)    | 16 (100%)        | 0 (0%)  | 0 (0%)    | 0 (0%)    | 0 (0%)    | 0 (0%)  |
| Diaphoresis                 | 16 (94.12%)               | 0 (0%)  | 1 (5.88%) | 0 (0%)    | 0 (0%)    | 0 (0%)  | 16 (100%)      | 0 (0%)  | 0 (0%)  | 0 (0%)  | 0 (0%)  | 0 (0%)    | 16 (100%)        | 0 (0%)  | 0 (0%)    | 0 (0%)    | 0 (0%)    | 0 (0%)  |
| Diarrhea                    | 17 (100%)                 | 0 (0%)  | 0 (0%)    | 0 (0%)    | 0 (0%)    | 0 (0%)  | 16 (100%)      | 0 (0%)  | 0 (0%)  | 0 (0%)  | 0 (0%)  | 0 (0%)    | 16 (100%)        | 0 (0%)  | 0 (0%)    | 0 (0%)    | 0 (0%)    | 0 (0%)  |



|                           | Adjuvant + AGS-V (N = 17) |         |             |           |         |         | AGS-V (N = 16) |         |             |           |           |         | Placebo (N = 16) |         |             |           |           |         |
|---------------------------|---------------------------|---------|-------------|-----------|---------|---------|----------------|---------|-------------|-----------|-----------|---------|------------------|---------|-------------|-----------|-----------|---------|
| Event                     | No Sx                     | Grade 0 | Grade 1     | Grade 2   | Grade 3 | Grade 4 | No Sx          | Grade 0 | Grade 1     | Grade 2   | Grade 3   | Grade 4 | No Sx            | Grade 0 | Grade 1     | Grade 2   | Grade 3   | Grade 4 |
| Difficulty sleeping       | 17 (100%)                 | 0 (0%)  | 0 (0%)      | 0 (0%)    | 0 (0%)  | 0 (0%)  | 16 (100%)      | 0 (0%)  | 0 (0%)      | 0 (0%)    | 0 (0%)    | 0 (0%)  | 16 (100%)        | 0 (0%)  | 0 (0%)      | 0 (0%)    | 0 (0%)    | 0 (0%)  |
| Dry cough                 | 17 (100%)                 | 0 (0%)  | 0 (0%)      | 0 (0%)    | 0 (0%)  | 0 (0%)  | 16 (100%)      | 0 (0%)  | 0 (0%)      | 0 (0%)    | 0 (0%)    | 0 (0%)  | 16 (100%)        | 0 (0%)  | 0 (0%)      | 0 (0%)    | 0 (0%)    | 0 (0%)  |
| Eczema                    | 17 (100%)                 | 0 (0%)  | 0 (0%)      | 0 (0%)    | 0 (0%)  | 0 (0%)  | 16 (100%)      | 0 (0%)  | 0 (0%)      | 0 (0%)    | 0 (0%)    | 0 (0%)  | 16 (100%)        | 0 (0%)  | 0 (0%)      | 0 (0%)    | 0 (0%)    | 0 (0%)  |
| Elevated liver enzymes    | 17 (100%)                 | 0 (0%)  | 0 (0%)      | 0 (0%)    | 0 (0%)  | 0 (0%)  | 16 (100%)      | 0 (0%)  | 0 (0%)      | 0 (0%)    | 0 (0%)    | 0 (0%)  | 16 (100%)        | 0 (0%)  | 0 (0%)      | 0 (0%)    | 0 (0%)    | 0 (0%)  |
| Elevated serum creatinine | 17 (100%)                 | 0 (0%)  | 0 (0%)      | 0 (0%)    | 0 (0%)  | 0 (0%)  | 16 (100%)      | 0 (0%)  | 0 (0%)      | 0 (0%)    | 0 (0%)    | 0 (0%)  | 16 (100%)        | 0 (0%)  | 0 (0%)      | 0 (0%)    | 0 (0%)    | 0 (0%)  |
| Eosinophilia              | 17 (100%)                 | 0 (0%)  | 0 (0%)      | 0 (0%)    | 0 (0%)  | 0 (0%)  | 16 (100%)      | 0 (0%)  | 0 (0%)      | 0 (0%)    | 0 (0%)    | 0 (0%)  | 16 (100%)        | 0 (0%)  | 0 (0%)      | 0 (0%)    | 0 (0%)    | 0 (0%)  |
| Erythema                  | 3 (17.65%)                | 0 (0%)  | 14 (82.35%) | 0 (0%)    | 0 (0%)  | 0 (0%)  | 1 (6.25%)      | 0 (0%)  | 15 (93.75%) | 0 (0%)    | 0 (0%)    | 0 (0%)  | 1 (6.25%)        | 0 (0%)  | 15 (93.75%) | 0 (0%)    | 0 (0%)    | 0 (0%)  |
| Eyelid Stye               | 17 (100%)                 | 0 (0%)  | 0 (0%)      | 0 (0%)    | 0 (0%)  | 0 (0%)  | 15 (93.75%)    | 0 (0%)  | 1 (6.25%)   | 0 (0%)    | 0 (0%)    | 0 (0%)  | 16 (100%)        | 0 (0%)  | 0 (0%)      | 0 (0%)    | 0 (0%)    | 0 (0%)  |
| Fatigue                   | 16 (94.12%)               | 0 (0%)  | 1 (5.88%)   | 0 (0%)    | 0 (0%)  | 0 (0%)  | 16 (100%)      | 0 (0%)  | 0 (0%)      | 0 (0%)    | 0 (0%)    | 0 (0%)  | 15 (93.75%)      | 0 (0%)  | 1 (6.25%)   | 0 (0%)    | 0 (0%)    | 0 (0%)  |
| Fever                     | 17 (100%)                 | 0 (0%)  | 0 (0%)      | 0 (0%)    | 0 (0%)  | 0 (0%)  | 16 (100%)      | 0 (0%)  | 0 (0%)      | 0 (0%)    | 0 (0%)    | 0 (0%)  | 16 (100%)        | 0 (0%)  | 0 (0%)      | 0 (0%)    | 0 (0%)    | 0 (0%)  |
| Feverish                  | 16 (94.12%)               | 0 (0%)  | 1 (5.88%)   | 0 (0%)    | 0 (0%)  | 0 (0%)  | 16 (100%)      | 0 (0%)  | 0 (0%)      | 0 (0%)    | 0 (0%)    | 0 (0%)  | 15 (93.75%)      | 0 (0%)  | 1 (6.25%)   | 0 (0%)    | 0 (0%)    | 0 (0%)  |
| Gastritis                 | 17 (100%)                 | 0 (0%)  | 0 (0%)      | 0 (0%)    | 0 (0%)  | 0 (0%)  | 16 (100%)      | 0 (0%)  | 0 (0%)      | 0 (0%)    | 0 (0%)    | 0 (0%)  | 16 (100%)        | 0 (0%)  | 0 (0%)      | 0 (0%)    | 0 (0%)    | 0 (0%)  |
| Headache                  | 17 (100%)                 | 0 (0%)  | 0 (0%)      | 0 (0%)    | 0 (0%)  | 0 (0%)  | 15 (93.75%)    | 0 (0%)  | 1 (6.25%)   | 0 (0%)    | 0 (0%)    | 0 (0%)  | 14 (87.5%)       | 0 (0%)  | 2 (12.5%)   | 0 (0%)    | 0 (0%)    | 0 (0%)  |
| Hematuria                 | 17 (100%)                 | 0 (0%)  | 0 (0%)      | 0 (0%)    | 0 (0%)  | 0 (0%)  | 15 (93.75%)    | 0 (0%)  | 0 (0%)      | 0 (0%)    | 1 (6.25%) | 0 (0%)  | 14 (87.5%)       | 0 (0%)  | 0 (0%)      | 2 (12.5%) | 0 (0%)    | 0 (0%)  |
| Hemoglobin decreased      | 14 (82.35%)               | 0 (0%)  | 3 (17.65%)  | 0 (0%)    | 0 (0%)  | 0 (0%)  | 13 (81.25%)    | 0 (0%)  | 2 (12.5%)   | 1 (6.25%) | 0 (0%)    | 0 (0%)  | 14 (87.5%)       | 0 (0%)  | 2 (12.5%)   | 0 (0%)    | 0 (0%)    | 0 (0%)  |
| Hyperglycemia             | 17 (100%)                 | 0 (0%)  | 0 (0%)      | 0 (0%)    | 0 (0%)  | 0 (0%)  | 16 (100%)      | 0 (0%)  | 0 (0%)      | 0 (0%)    | 0 (0%)    | 0 (0%)  | 16 (100%)        | 0 (0%)  | 0 (0%)      | 0 (0%)    | 0 (0%)    | 0 (0%)  |
| Hypnatremia               | 17 (100%)                 | 0 (0%)  | 0 (0%)      | 0 (0%)    | 0 (0%)  | 0 (0%)  | 15 (93.75%)    | 0 (0%)  | 1 (6.25%)   | 0 (0%)    | 0 (0%)    | 0 (0%)  | 15 (93.75%)      | 0 (0%)  | 0 (0%)      | 1 (6.25%) | 0 (0%)    | 0 (0%)  |
| Hypertension              | 17 (100%)                 | 0 (0%)  | 0 (0%)      | 0 (0%)    | 0 (0%)  | 0 (0%)  | 16 (100%)      | 0 (0%)  | 0 (0%)      | 0 (0%)    | 0 (0%)    | 0 (0%)  | 16 (100%)        | 0 (0%)  | 0 (0%)      | 0 (0%)    | 0 (0%)    | 0 (0%)  |
| Hypocalcemia              | 17 (100%)                 | 0 (0%)  | 0 (0%)      | 0 (0%)    | 0 (0%)  | 0 (0%)  | 16 (100%)      | 0 (0%)  | 0 (0%)      | 0 (0%)    | 0 (0%)    | 0 (0%)  | 16 (100%)        | 0 (0%)  | 0 (0%)      | 0 (0%)    | 0 (0%)    | 0 (0%)  |
| Hypoglycemia              | 17 (100%)                 | 0 (0%)  | 0 (0%)      | 0 (0%)    | 0 (0%)  | 0 (0%)  | 16 (100%)      | 0 (0%)  | 0 (0%)      | 0 (0%)    | 0 (0%)    | 0 (0%)  | 16 (100%)        | 0 (0%)  | 0 (0%)      | 0 (0%)    | 0 (0%)    | 0 (0%)  |
| Hypokalemia               | 15 (88.24%)               | 0 (0%)  | 1 (5.88%)   | 1 (5.88%) | 0 (0%)  | 0 (0%)  | 16 (100%)      | 0 (0%)  | 0 (0%)      | 0 (0%)    | 0 (0%)    | 0 (0%)  | 15 (93.75%)      | 0 (0%)  | 0 (0%)      | 0 (0%)    | 1 (6.25%) | 0 (0%)  |

| Event                      | Adjuvant + AGS-V (N = 17) |         |                |              |         |         | AGS-V (N = 16) |         |                |         |         |         | Placebo (N = 16) |         |                |         |         |         |
|----------------------------|---------------------------|---------|----------------|--------------|---------|---------|----------------|---------|----------------|---------|---------|---------|------------------|---------|----------------|---------|---------|---------|
|                            | No Sx                     | Grade 0 | Grade 1        | Grade 2      | Grade 3 | Grade 4 | No Sx          | Grade 0 | Grade 1        | Grade 2 | Grade 3 | Grade 4 | No Sx            | Grade 0 | Grade 1        | Grade 2 | Grade 3 | Grade 4 |
| Hyponatremia               | 16<br>(94.12%)            | 0 (0%)  | 1<br>(5.88%)   | 0 (0%)       | 0 (0%)  | 0 (0%)  | 16<br>(100%)   | 0 (0%)  | 0 (0%)         | 0 (0%)  | 0 (0%)  | 0 (0%)  | 16<br>(100%)     | 0 (0%)  | 0 (0%)         | 0 (0%)  | 0 (0%)  | 0 (0%)  |
| Hypophosphatemia           | 17<br>(100%)              | 0 (0%)  | 0 (0%)         | 0 (0%)       | 0 (0%)  | 0 (0%)  | 16<br>(100%)   | 0 (0%)  | 0 (0%)         | 0 (0%)  | 0 (0%)  | 0 (0%)  | 15<br>(93.75%)   | 0 (0%)  | 1<br>(6.25%)   | 0 (0%)  | 0 (0%)  | 0 (0%)  |
| Influenza                  | 16<br>(94.12%)            | 0 (0%)  | 0 (0%)         | 1<br>(5.88%) | 0 (0%)  | 0 (0%)  | 16<br>(100%)   | 0 (0%)  | 0 (0%)         | 0 (0%)  | 0 (0%)  | 0 (0%)  | 16<br>(100%)     | 0 (0%)  | 0 (0%)         | 0 (0%)  | 0 (0%)  | 0 (0%)  |
| Injection site erythema    | 17<br>(100%)              | 0 (0%)  | 0 (0%)         | 0 (0%)       | 0 (0%)  | 0 (0%)  | 16<br>(100%)   | 0 (0%)  | 0 (0%)         | 0 (0%)  | 0 (0%)  | 0 (0%)  | 16<br>(100%)     | 0 (0%)  | 0 (0%)         | 0 (0%)  | 0 (0%)  | 0 (0%)  |
| Injection site induration  | 17<br>(100%)              | 0 (0%)  | 0 (0%)         | 0 (0%)       | 0 (0%)  | 0 (0%)  | 16<br>(100%)   | 0 (0%)  | 0 (0%)         | 0 (0%)  | 0 (0%)  | 0 (0%)  | 16<br>(100%)     | 0 (0%)  | 0 (0%)         | 0 (0%)  | 0 (0%)  | 0 (0%)  |
| Injection site itching     | 17<br>(100%)              | 0 (0%)  | 0 (0%)         | 0 (0%)       | 0 (0%)  | 0 (0%)  | 16<br>(100%)   | 0 (0%)  | 0 (0%)         | 0 (0%)  | 0 (0%)  | 0 (0%)  | 16<br>(100%)     | 0 (0%)  | 0 (0%)         | 0 (0%)  | 0 (0%)  | 0 (0%)  |
| Injection site pain        | 17<br>(100%)              | 0 (0%)  | 0 (0%)         | 0 (0%)       | 0 (0%)  | 0 (0%)  | 16<br>(100%)   | 0 (0%)  | 0 (0%)         | 0 (0%)  | 0 (0%)  | 0 (0%)  | 16<br>(100%)     | 0 (0%)  | 0 (0%)         | 0 (0%)  | 0 (0%)  | 0 (0%)  |
| Injection site pruritus    | 17<br>(100%)              | 0 (0%)  | 0 (0%)         | 0 (0%)       | 0 (0%)  | 0 (0%)  | 16<br>(100%)   | 0 (0%)  | 0 (0%)         | 0 (0%)  | 0 (0%)  | 0 (0%)  | 16<br>(100%)     | 0 (0%)  | 0 (0%)         | 0 (0%)  | 0 (0%)  | 0 (0%)  |
| Injection site swelling    | 17<br>(100%)              | 0 (0%)  | 0 (0%)         | 0 (0%)       | 0 (0%)  | 0 (0%)  | 16<br>(100%)   | 0 (0%)  | 0 (0%)         | 0 (0%)  | 0 (0%)  | 0 (0%)  | 16<br>(100%)     | 0 (0%)  | 0 (0%)         | 0 (0%)  | 0 (0%)  | 0 (0%)  |
| Injury                     | 17<br>(100%)              | 0 (0%)  | 0 (0%)         | 0 (0%)       | 0 (0%)  | 0 (0%)  | 16<br>(100%)   | 0 (0%)  | 0 (0%)         | 0 (0%)  | 0 (0%)  | 0 (0%)  | 16<br>(100%)     | 0 (0%)  | 0 (0%)         | 0 (0%)  | 0 (0%)  | 0 (0%)  |
| Insect bite                | 17<br>(100%)              | 0 (0%)  | 0 (0%)         | 0 (0%)       | 0 (0%)  | 0 (0%)  | 16<br>(100%)   | 0 (0%)  | 0 (0%)         | 0 (0%)  | 0 (0%)  | 0 (0%)  | 16<br>(100%)     | 0 (0%)  | 0 (0%)         | 0 (0%)  | 0 (0%)  | 0 (0%)  |
| Iron deficiency anemia     | 17<br>(100%)              | 0 (0%)  | 0 (0%)         | 0 (0%)       | 0 (0%)  | 0 (0%)  | 16<br>(100%)   | 0 (0%)  | 0 (0%)         | 0 (0%)  | 0 (0%)  | 0 (0%)  | 16<br>(100%)     | 0 (0%)  | 0 (0%)         | 0 (0%)  | 0 (0%)  | 0 (0%)  |
| Knee pain                  | 17<br>(100%)              | 0 (0%)  | 0 (0%)         | 0 (0%)       | 0 (0%)  | 0 (0%)  | 16<br>(100%)   | 0 (0%)  | 0 (0%)         | 0 (0%)  | 0 (0%)  | 0 (0%)  | 16<br>(100%)     | 0 (0%)  | 0 (0%)         | 0 (0%)  | 0 (0%)  | 0 (0%)  |
| Laryngitis                 | 17<br>(100%)              | 0 (0%)  | 0 (0%)         | 0 (0%)       | 0 (0%)  | 0 (0%)  | 16<br>(100%)   | 0 (0%)  | 0 (0%)         | 0 (0%)  | 0 (0%)  | 0 (0%)  | 16<br>(100%)     | 0 (0%)  | 0 (0%)         | 0 (0%)  | 0 (0%)  | 0 (0%)  |
| Local swelling             | 1<br>(5.88%)              | 0 (0%)  | 16<br>(94.12%) | 0 (0%)       | 0 (0%)  | 0 (0%)  | 1<br>(6.25%)   | 0 (0%)  | 15<br>(93.75%) | 0 (0%)  | 0 (0%)  | 0 (0%)  | 1<br>(6.25%)     | 0 (0%)  | 15<br>(93.75%) | 0 (0%)  | 0 (0%)  | 0 (0%)  |
| Lymph node tenderness      | 17<br>(100%)              | 0 (0%)  | 0 (0%)         | 0 (0%)       | 0 (0%)  | 0 (0%)  | 16<br>(100%)   | 0 (0%)  | 0 (0%)         | 0 (0%)  | 0 (0%)  | 0 (0%)  | 16<br>(100%)     | 0 (0%)  | 0 (0%)         | 0 (0%)  | 0 (0%)  | 0 (0%)  |
| Lymphocyte count increased | 17<br>(100%)              | 0 (0%)  | 0 (0%)         | 0 (0%)       | 0 (0%)  | 0 (0%)  | 16<br>(100%)   | 0 (0%)  | 0 (0%)         | 0 (0%)  | 0 (0%)  | 0 (0%)  | 16<br>(100%)     | 0 (0%)  | 0 (0%)         | 0 (0%)  | 0 (0%)  | 0 (0%)  |
| Muscle ache                | 17<br>(100%)              | 0 (0%)  | 0 (0%)         | 0 (0%)       | 0 (0%)  | 0 (0%)  | 16<br>(100%)   | 0 (0%)  | 0 (0%)         | 0 (0%)  | 0 (0%)  | 0 (0%)  | 16<br>(100%)     | 0 (0%)  | 0 (0%)         | 0 (0%)  | 0 (0%)  | 0 (0%)  |
| Muscle strain              | 17<br>(100%)              | 0 (0%)  | 0 (0%)         | 0 (0%)       | 0 (0%)  | 0 (0%)  | 16<br>(100%)   | 0 (0%)  | 0 (0%)         | 0 (0%)  | 0 (0%)  | 0 (0%)  | 16<br>(100%)     | 0 (0%)  | 0 (0%)         | 0 (0%)  | 0 (0%)  | 0 (0%)  |
| Myalgia                    | 17<br>(100%)              | 0 (0%)  | 0 (0%)         | 0 (0%)       | 0 (0%)  | 0 (0%)  | 16<br>(100%)   | 0 (0%)  | 0 (0%)         | 0 (0%)  | 0 (0%)  | 0 (0%)  | 14<br>(87.5%)    | 0 (0%)  | 2<br>(12.5%)   | 0 (0%)  | 0 (0%)  | 0 (0%)  |
| Nasal congestion           | 15<br>(88.24%)            | 0 (0%)  | 2<br>(11.76%)  | 0 (0%)       | 0 (0%)  | 0 (0%)  | 16<br>(100%)   | 0 (0%)  | 0 (0%)         | 0 (0%)  | 0 (0%)  | 0 (0%)  | 16<br>(100%)     | 0 (0%)  | 0 (0%)         | 0 (0%)  | 0 (0%)  | 0 (0%)  |

| Event                             | Adjuvant + AGS-V (N = 17) |         |           |           |           |         | AGS-V (N = 16) |         |           |           |         |         | Placebo (N = 16) |         |           |           |           |         |
|-----------------------------------|---------------------------|---------|-----------|-----------|-----------|---------|----------------|---------|-----------|-----------|---------|---------|------------------|---------|-----------|-----------|-----------|---------|
|                                   | No Sx                     | Grade 0 | Grade 1   | Grade 2   | Grade 3   | Grade 4 | No Sx          | Grade 0 | Grade 1   | Grade 2   | Grade 3 | Grade 4 | No Sx            | Grade 0 | Grade 1   | Grade 2   | Grade 3   | Grade 4 |
| Nausea                            | 17 (100%)                 | 0 (0%)  | 0 (0%)    | 0 (0%)    | 0 (0%)    | 0 (0%)  | 13 (81.25%)    | 0 (0%)  | 2 (12.5%) | 1 (6.25%) | 0 (0%)  | 0 (0%)  | 16 (100%)        | 0 (0%)  | 0 (0%)    | 0 (0%)    | 0 (0%)    | 0 (0%)  |
| Neutrophil count decreased        | 17 (100%)                 | 0 (0%)  | 0 (0%)    | 0 (0%)    | 0 (0%)    | 0 (0%)  | 15 (93.75%)    | 0 (0%)  | 1 (6.25%) | 0 (0%)    | 0 (0%)  | 0 (0%)  | 15 (93.75%)      | 0 (0%)  | 0 (0%)    | 1 (6.25%) | 0 (0%)    | 0 (0%)  |
| Oral pain                         | 17 (100%)                 | 0 (0%)  | 0 (0%)    | 0 (0%)    | 0 (0%)    | 0 (0%)  | 16 (100%)      | 0 (0%)  | 0 (0%)    | 0 (0%)    | 0 (0%)  | 0 (0%)  | 16 (100%)        | 0 (0%)  | 0 (0%)    | 0 (0%)    | 0 (0%)    | 0 (0%)  |
| Peripheral neuropathy             | 17 (100%)                 | 0 (0%)  | 0 (0%)    | 0 (0%)    | 0 (0%)    | 0 (0%)  | 16 (100%)      | 0 (0%)  | 0 (0%)    | 0 (0%)    | 0 (0%)  | 0 (0%)  | 15 (93.75%)      | 0 (0%)  | 1 (6.25%) | 0 (0%)    | 0 (0%)    | 0 (0%)  |
| Productive cough                  | 17 (100%)                 | 0 (0%)  | 0 (0%)    | 0 (0%)    | 0 (0%)    | 0 (0%)  | 16 (100%)      | 0 (0%)  | 0 (0%)    | 0 (0%)    | 0 (0%)  | 0 (0%)  | 16 (100%)        | 0 (0%)  | 0 (0%)    | 0 (0%)    | 0 (0%)    | 0 (0%)  |
| Pruritic rash                     | 15 (88.24%)               | 0 (0%)  | 0 (0%)    | 1 (5.88%) | 1 (5.88%) | 0 (0%)  | 15 (93.75%)    | 0 (0%)  | 1 (6.25%) | 0 (0%)    | 0 (0%)  | 0 (0%)  | 16 (100%)        | 0 (0%)  | 0 (0%)    | 0 (0%)    | 0 (0%)    | 0 (0%)  |
| Pruritus                          | 17 (100%)                 | 0 (0%)  | 0 (0%)    | 0 (0%)    | 0 (0%)    | 0 (0%)  | 16 (100%)      | 0 (0%)  | 0 (0%)    | 0 (0%)    | 0 (0%)  | 0 (0%)  | 16 (100%)        | 0 (0%)  | 0 (0%)    | 0 (0%)    | 0 (0%)    | 0 (0%)  |
| Rash                              | 17 (100%)                 | 0 (0%)  | 0 (0%)    | 0 (0%)    | 0 (0%)    | 0 (0%)  | 16 (100%)      | 0 (0%)  | 0 (0%)    | 0 (0%)    | 0 (0%)  | 0 (0%)  | 16 (100%)        | 0 (0%)  | 0 (0%)    | 0 (0%)    | 0 (0%)    | 0 (0%)  |
| Rhinorrhea                        | 16 (94.12%)               | 0 (0%)  | 1 (5.88%) | 0 (0%)    | 0 (0%)    | 0 (0%)  | 16 (100%)      | 0 (0%)  | 0 (0%)    | 0 (0%)    | 0 (0%)  | 0 (0%)  | 16 (100%)        | 0 (0%)  | 0 (0%)    | 0 (0%)    | 0 (0%)    | 0 (0%)  |
| Sinusitis                         | 17 (100%)                 | 0 (0%)  | 0 (0%)    | 0 (0%)    | 0 (0%)    | 0 (0%)  | 16 (100%)      | 0 (0%)  | 0 (0%)    | 0 (0%)    | 0 (0%)  | 0 (0%)  | 16 (100%)        | 0 (0%)  | 0 (0%)    | 0 (0%)    | 0 (0%)    | 0 (0%)  |
| Skin hyperpigmentation            | 17 (100%)                 | 0 (0%)  | 0 (0%)    | 0 (0%)    | 0 (0%)    | 0 (0%)  | 16 (100%)      | 0 (0%)  | 0 (0%)    | 0 (0%)    | 0 (0%)  | 0 (0%)  | 16 (100%)        | 0 (0%)  | 0 (0%)    | 0 (0%)    | 0 (0%)    | 0 (0%)  |
| Skin induration                   | 17 (100%)                 | 0 (0%)  | 0 (0%)    | 0 (0%)    | 0 (0%)    | 0 (0%)  | 16 (100%)      | 0 (0%)  | 0 (0%)    | 0 (0%)    | 0 (0%)  | 0 (0%)  | 16 (100%)        | 0 (0%)  | 0 (0%)    | 0 (0%)    | 0 (0%)    | 0 (0%)  |
| Sore throat                       | 16 (94.12%)               | 0 (0%)  | 1 (5.88%) | 0 (0%)    | 0 (0%)    | 0 (0%)  | 15 (93.75%)    | 0 (0%)  | 0 (0%)    | 1 (6.25%) | 0 (0%)  | 0 (0%)  | 16 (100%)        | 0 (0%)  | 0 (0%)    | 0 (0%)    | 0 (0%)    | 0 (0%)  |
| Systolic hypertension             | 17 (100%)                 | 0 (0%)  | 0 (0%)    | 0 (0%)    | 0 (0%)    | 0 (0%)  | 16 (100%)      | 0 (0%)  | 0 (0%)    | 0 (0%)    | 0 (0%)  | 0 (0%)  | 16 (100%)        | 0 (0%)  | 0 (0%)    | 0 (0%)    | 0 (0%)    | 0 (0%)  |
| Tenderness                        | 17 (100%)                 | 0 (0%)  | 0 (0%)    | 0 (0%)    | 0 (0%)    | 0 (0%)  | 16 (100%)      | 0 (0%)  | 0 (0%)    | 0 (0%)    | 0 (0%)  | 0 (0%)  | 16 (100%)        | 0 (0%)  | 0 (0%)    | 0 (0%)    | 0 (0%)    | 0 (0%)  |
| Tooth extraction                  | 17 (100%)                 | 0 (0%)  | 0 (0%)    | 0 (0%)    | 0 (0%)    | 0 (0%)  | 16 (100%)      | 0 (0%)  | 0 (0%)    | 0 (0%)    | 0 (0%)  | 0 (0%)  | 16 (100%)        | 0 (0%)  | 0 (0%)    | 0 (0%)    | 0 (0%)    | 0 (0%)  |
| Torn bicep tendon                 | 17 (100%)                 | 0 (0%)  | 0 (0%)    | 0 (0%)    | 0 (0%)    | 0 (0%)  | 16 (100%)      | 0 (0%)  | 0 (0%)    | 0 (0%)    | 0 (0%)  | 0 (0%)  | 16 (100%)        | 0 (0%)  | 0 (0%)    | 0 (0%)    | 0 (0%)    | 0 (0%)  |
| Upper respiratory tract infection | 17 (100%)                 | 0 (0%)  | 0 (0%)    | 0 (0%)    | 0 (0%)    | 0 (0%)  | 16 (100%)      | 0 (0%)  | 0 (0%)    | 0 (0%)    | 0 (0%)  | 0 (0%)  | 16 (100%)        | 0 (0%)  | 0 (0%)    | 0 (0%)    | 0 (0%)    | 0 (0%)  |
| Urinary frequency                 | 17 (100%)                 | 0 (0%)  | 0 (0%)    | 0 (0%)    | 0 (0%)    | 0 (0%)  | 16 (100%)      | 0 (0%)  | 0 (0%)    | 0 (0%)    | 0 (0%)  | 0 (0%)  | 15 (93.75%)      | 0 (0%)  | 1 (6.25%) | 0 (0%)    | 0 (0%)    | 0 (0%)  |
| Urinary tract infection           | 17 (100%)                 | 0 (0%)  | 0 (0%)    | 0 (0%)    | 0 (0%)    | 0 (0%)  | 16 (100%)      | 0 (0%)  | 0 (0%)    | 0 (0%)    | 0 (0%)  | 0 (0%)  | 15 (93.75%)      | 0 (0%)  | 0 (0%)    | 0 (0%)    | 1 (6.25%) | 0 (0%)  |
| Urine WBC increased               | 17 (100%)                 | 0 (0%)  | 0 (0%)    | 0 (0%)    | 0 (0%)    | 0 (0%)  | 16 (100%)      | 0 (0%)  | 0 (0%)    | 0 (0%)    | 0 (0%)  | 0 (0%)  | 16 (100%)        | 0 (0%)  | 0 (0%)    | 0 (0%)    | 0 (0%)    | 0 (0%)  |

| Event                | Adjuvant + AGS-V (N = 17) |         |           |         |         |         | AGS-V (N = 16) |         |           |           |         |         | Placebo (N = 16) |         |         |         |           |         |
|----------------------|---------------------------|---------|-----------|---------|---------|---------|----------------|---------|-----------|-----------|---------|---------|------------------|---------|---------|---------|-----------|---------|
|                      | No Sx                     | Grade 0 | Grade 1   | Grade 2 | Grade 3 | Grade 4 | No Sx          | Grade 0 | Grade 1   | Grade 2   | Grade 3 | Grade 4 | No Sx            | Grade 0 | Grade 1 | Grade 2 | Grade 3   | Grade 4 |
| Urticaria            | 17 (100%)                 | 0 (0%)  | 0 (0%)    | 0 (0%)  | 0 (0%)  | 0 (0%)  | 16 (100%)      | 0 (0%)  | 0 (0%)    | 0 (0%)    | 0 (0%)  | 0 (0%)  | 16 (100%)        | 0 (0%)  | 0 (0%)  | 0 (0%)  | 0 (0%)    | 0 (0%)  |
| Vertigo              | 17 (100%)                 | 0 (0%)  | 0 (0%)    | 0 (0%)  | 0 (0%)  | 0 (0%)  | 16 (100%)      | 0 (0%)  | 0 (0%)    | 0 (0%)    | 0 (0%)  | 0 (0%)  | 15 (93.75%)      | 0 (0%)  | 0 (0%)  | 0 (0%)  | 1 (6.25%) | 0 (0%)  |
| Vitamin D deficiency | 17 (100%)                 | 0 (0%)  | 0 (0%)    | 0 (0%)  | 0 (0%)  | 0 (0%)  | 16 (100%)      | 0 (0%)  | 0 (0%)    | 0 (0%)    | 0 (0%)  | 0 (0%)  | 16 (100%)        | 0 (0%)  | 0 (0%)  | 0 (0%)  | 0 (0%)    | 0 (0%)  |
| Vomiting             | 17 (100%)                 | 0 (0%)  | 0 (0%)    | 0 (0%)  | 0 (0%)  | 0 (0%)  | 14 (87.5%)     | 0 (0%)  | 1 (6.25%) | 1 (6.25%) | 0 (0%)  | 0 (0%)  | 16 (100%)        | 0 (0%)  | 0 (0%)  | 0 (0%)  | 0 (0%)    | 0 (0%)  |
| WBC decreased        | 17 (100%)                 | 0 (0%)  | 0 (0%)    | 0 (0%)  | 0 (0%)  | 0 (0%)  | 16 (100%)      | 0 (0%)  | 0 (0%)    | 0 (0%)    | 0 (0%)  | 0 (0%)  | 16 (100%)        | 0 (0%)  | 0 (0%)  | 0 (0%)  | 0 (0%)    | 0 (0%)  |
| WBC increased        | 16 (94.12%)               | 0 (0%)  | 1 (5.88%) | 0 (0%)  | 0 (0%)  | 0 (0%)  | 14 (87.5%)     | 0 (0%)  | 2 (12.5%) | 0 (0%)    | 0 (0%)  | 0 (0%)  | 16 (100%)        | 0 (0%)  | 0 (0%)  | 0 (0%)  | 0 (0%)    | 0 (0%)  |

**Table 10 : Occurrence of Max Grade Events Per Subject which are Possibly Related to Treatment by Treatment Group**

| Event                                | Adjuvant + AGS-V (N = 17) |         |            |         |         |         | AGS-V (N = 16) |         |           |         |         |         | Placebo (N = 16) |         |         |         |         |         |
|--------------------------------------|---------------------------|---------|------------|---------|---------|---------|----------------|---------|-----------|---------|---------|---------|------------------|---------|---------|---------|---------|---------|
|                                      | No Sx                     | Grade 0 | Grade 1    | Grade 2 | Grade 3 | Grade 4 | No Sx          | Grade 0 | Grade 1   | Grade 2 | Grade 3 | Grade 4 | No Sx            | Grade 0 | Grade 1 | Grade 2 | Grade 3 | Grade 4 |
| Abdominal cramps                     | 17 (100%)                 | 0 (0%)  | 0 (0%)     | 0 (0%)  | 0 (0%)  | 0 (0%)  | 16 (100%)      | 0 (0%)  | 0 (0%)    | 0 (0%)  | 0 (0%)  | 0 (0%)  | 16 (100%)        | 0 (0%)  | 0 (0%)  | 0 (0%)  | 0 (0%)  | 0 (0%)  |
| Abdominal pain                       | 15 (88.24%)               | 0 (0%)  | 2 (11.76%) | 0 (0%)  | 0 (0%)  | 0 (0%)  | 15 (93.75%)    | 0 (0%)  | 1 (6.25%) | 0 (0%)  | 0 (0%)  | 0 (0%)  | 16 (100%)        | 0 (0%)  | 0 (0%)  | 0 (0%)  | 0 (0%)  | 0 (0%)  |
| Absolute neutrophil count, decreased | 17 (100%)                 | 0 (0%)  | 0 (0%)     | 0 (0%)  | 0 (0%)  | 0 (0%)  | 16 (100%)      | 0 (0%)  | 0 (0%)    | 0 (0%)  | 0 (0%)  | 0 (0%)  | 16 (100%)        | 0 (0%)  | 0 (0%)  | 0 (0%)  | 0 (0%)  | 0 (0%)  |
| Acute sinusitis                      | 17 (100%)                 | 0 (0%)  | 0 (0%)     | 0 (0%)  | 0 (0%)  | 0 (0%)  | 16 (100%)      | 0 (0%)  | 0 (0%)    | 0 (0%)  | 0 (0%)  | 0 (0%)  | 16 (100%)        | 0 (0%)  | 0 (0%)  | 0 (0%)  | 0 (0%)  | 0 (0%)  |
| ALT increased                        | 17 (100%)                 | 0 (0%)  | 0 (0%)     | 0 (0%)  | 0 (0%)  | 0 (0%)  | 15 (93.75%)    | 0 (0%)  | 1 (6.25%) | 0 (0%)  | 0 (0%)  | 0 (0%)  | 16 (100%)        | 0 (0%)  | 0 (0%)  | 0 (0%)  | 0 (0%)  | 0 (0%)  |
| Anxiety                              | 17 (100%)                 | 0 (0%)  | 0 (0%)     | 0 (0%)  | 0 (0%)  | 0 (0%)  | 16 (100%)      | 0 (0%)  | 0 (0%)    | 0 (0%)  | 0 (0%)  | 0 (0%)  | 16 (100%)        | 0 (0%)  | 0 (0%)  | 0 (0%)  | 0 (0%)  | 0 (0%)  |
| Arthralgia                           | 16 (94.12%)               | 0 (0%)  | 1 (5.88%)  | 0 (0%)  | 0 (0%)  | 0 (0%)  | 15 (93.75%)    | 0 (0%)  | 1 (6.25%) | 0 (0%)  | 0 (0%)  | 0 (0%)  | 16 (100%)        | 0 (0%)  | 0 (0%)  | 0 (0%)  | 0 (0%)  | 0 (0%)  |
| AST increased                        | 17 (100%)                 | 0 (0%)  | 0 (0%)     | 0 (0%)  | 0 (0%)  | 0 (0%)  | 16 (100%)      | 0 (0%)  | 0 (0%)    | 0 (0%)  | 0 (0%)  | 0 (0%)  | 16 (100%)        | 0 (0%)  | 0 (0%)  | 0 (0%)  | 0 (0%)  | 0 (0%)  |
| Bilirubin total high                 | 17 (100%)                 | 0 (0%)  | 0 (0%)     | 0 (0%)  | 0 (0%)  | 0 (0%)  | 16 (100%)      | 0 (0%)  | 0 (0%)    | 0 (0%)  | 0 (0%)  | 0 (0%)  | 16 (100%)        | 0 (0%)  | 0 (0%)  | 0 (0%)  | 0 (0%)  | 0 (0%)  |
| Blood eosinophils increased          | 17 (100%)                 | 0 (0%)  | 0 (0%)     | 0 (0%)  | 0 (0%)  | 0 (0%)  | 16 (100%)      | 0 (0%)  | 0 (0%)    | 0 (0%)  | 0 (0%)  | 0 (0%)  | 16 (100%)        | 0 (0%)  | 0 (0%)  | 0 (0%)  | 0 (0%)  | 0 (0%)  |
| Bradycardia                          | 17 (100%)                 | 0 (0%)  | 0 (0%)     | 0 (0%)  | 0 (0%)  | 0 (0%)  | 16 (100%)      | 0 (0%)  | 0 (0%)    | 0 (0%)  | 0 (0%)  | 0 (0%)  | 16 (100%)        | 0 (0%)  | 0 (0%)  | 0 (0%)  | 0 (0%)  | 0 (0%)  |

|                           | Adjuvant + AGS-V (N = 17) |         |           |         |         |         | AGS-V (N = 16) |         |           |         |         |         | Placebo (N = 16) |         |           |         |         |         |
|---------------------------|---------------------------|---------|-----------|---------|---------|---------|----------------|---------|-----------|---------|---------|---------|------------------|---------|-----------|---------|---------|---------|
| Event                     | No Sx                     | Grade 0 | Grade 1   | Grade 2 | Grade 3 | Grade 4 | No Sx          | Grade 0 | Grade 1   | Grade 2 | Grade 3 | Grade 4 | No Sx            | Grade 0 | Grade 1   | Grade 2 | Grade 3 | Grade 4 |
| BUN increased             | 17 (100%)                 | 0 (0%)  | 0 (0%)    | 0 (0%)  | 0 (0%)  | 0 (0%)  | 16 (100%)      | 0 (0%)  | 0 (0%)    | 0 (0%)  | 0 (0%)  | 0 (0%)  | 16 (100%)        | 0 (0%)  | 0 (0%)    | 0 (0%)  | 0 (0%)  | 0 (0%)  |
| Campylobacter             | 17 (100%)                 | 0 (0%)  | 0 (0%)    | 0 (0%)  | 0 (0%)  | 0 (0%)  | 16 (100%)      | 0 (0%)  | 0 (0%)    | 0 (0%)  | 0 (0%)  | 0 (0%)  | 16 (100%)        | 0 (0%)  | 0 (0%)    | 0 (0%)  | 0 (0%)  | 0 (0%)  |
| Candida vaginitis         | 17 (100%)                 | 0 (0%)  | 0 (0%)    | 0 (0%)  | 0 (0%)  | 0 (0%)  | 16 (100%)      | 0 (0%)  | 0 (0%)    | 0 (0%)  | 0 (0%)  | 0 (0%)  | 16 (100%)        | 0 (0%)  | 0 (0%)    | 0 (0%)  | 0 (0%)  | 0 (0%)  |
| Chills                    | 17 (100%)                 | 0 (0%)  | 0 (0%)    | 0 (0%)  | 0 (0%)  | 0 (0%)  | 16 (100%)      | 0 (0%)  | 0 (0%)    | 0 (0%)  | 0 (0%)  | 0 (0%)  | 16 (100%)        | 0 (0%)  | 0 (0%)    | 0 (0%)  | 0 (0%)  | 0 (0%)  |
| Common cold               | 17 (100%)                 | 0 (0%)  | 0 (0%)    | 0 (0%)  | 0 (0%)  | 0 (0%)  | 16 (100%)      | 0 (0%)  | 0 (0%)    | 0 (0%)  | 0 (0%)  | 0 (0%)  | 15 (93.75%)      | 0 (0%)  | 1 (6.25%) | 0 (0%)  | 0 (0%)  | 0 (0%)  |
| Constipation              | 17 (100%)                 | 0 (0%)  | 0 (0%)    | 0 (0%)  | 0 (0%)  | 0 (0%)  | 16 (100%)      | 0 (0%)  | 0 (0%)    | 0 (0%)  | 0 (0%)  | 0 (0%)  | 16 (100%)        | 0 (0%)  | 0 (0%)    | 0 (0%)  | 0 (0%)  | 0 (0%)  |
| Coryza                    | 17 (100%)                 | 0 (0%)  | 0 (0%)    | 0 (0%)  | 0 (0%)  | 0 (0%)  | 16 (100%)      | 0 (0%)  | 0 (0%)    | 0 (0%)  | 0 (0%)  | 0 (0%)  | 16 (100%)        | 0 (0%)  | 0 (0%)    | 0 (0%)  | 0 (0%)  | 0 (0%)  |
| CPK increased             | 17 (100%)                 | 0 (0%)  | 0 (0%)    | 0 (0%)  | 0 (0%)  | 0 (0%)  | 16 (100%)      | 0 (0%)  | 0 (0%)    | 0 (0%)  | 0 (0%)  | 0 (0%)  | 16 (100%)        | 0 (0%)  | 0 (0%)    | 0 (0%)  | 0 (0%)  | 0 (0%)  |
| Creatine kinase           | 17 (100%)                 | 0 (0%)  | 0 (0%)    | 0 (0%)  | 0 (0%)  | 0 (0%)  | 16 (100%)      | 0 (0%)  | 0 (0%)    | 0 (0%)  | 0 (0%)  | 0 (0%)  | 16 (100%)        | 0 (0%)  | 0 (0%)    | 0 (0%)  | 0 (0%)  | 0 (0%)  |
| Creatine kinase high      | 17 (100%)                 | 0 (0%)  | 0 (0%)    | 0 (0%)  | 0 (0%)  | 0 (0%)  | 16 (100%)      | 0 (0%)  | 0 (0%)    | 0 (0%)  | 0 (0%)  | 0 (0%)  | 16 (100%)        | 0 (0%)  | 0 (0%)    | 0 (0%)  | 0 (0%)  | 0 (0%)  |
| Creatinine increased      | 17 (100%)                 | 0 (0%)  | 0 (0%)    | 0 (0%)  | 0 (0%)  | 0 (0%)  | 16 (100%)      | 0 (0%)  | 0 (0%)    | 0 (0%)  | 0 (0%)  | 0 (0%)  | 16 (100%)        | 0 (0%)  | 0 (0%)    | 0 (0%)  | 0 (0%)  | 0 (0%)  |
| Dermatitis                | 17 (100%)                 | 0 (0%)  | 0 (0%)    | 0 (0%)  | 0 (0%)  | 0 (0%)  | 16 (100%)      | 0 (0%)  | 0 (0%)    | 0 (0%)  | 0 (0%)  | 0 (0%)  | 16 (100%)        | 0 (0%)  | 0 (0%)    | 0 (0%)  | 0 (0%)  | 0 (0%)  |
| Diaphoresis               | 17 (100%)                 | 0 (0%)  | 0 (0%)    | 0 (0%)  | 0 (0%)  | 0 (0%)  | 15 (93.75%)    | 0 (0%)  | 1 (6.25%) | 0 (0%)  | 0 (0%)  | 0 (0%)  | 15 (93.75%)      | 0 (0%)  | 1 (6.25%) | 0 (0%)  | 0 (0%)  | 0 (0%)  |
| Diarrhea                  | 16 (94.12%)               | 0 (0%)  | 1 (5.88%) | 0 (0%)  | 0 (0%)  | 0 (0%)  | 16 (100%)      | 0 (0%)  | 0 (0%)    | 0 (0%)  | 0 (0%)  | 0 (0%)  | 16 (100%)        | 0 (0%)  | 0 (0%)    | 0 (0%)  | 0 (0%)  | 0 (0%)  |
| Difficulty sleeping       | 17 (100%)                 | 0 (0%)  | 0 (0%)    | 0 (0%)  | 0 (0%)  | 0 (0%)  | 16 (100%)      | 0 (0%)  | 0 (0%)    | 0 (0%)  | 0 (0%)  | 0 (0%)  | 16 (100%)        | 0 (0%)  | 0 (0%)    | 0 (0%)  | 0 (0%)  | 0 (0%)  |
| Dry cough                 | 17 (100%)                 | 0 (0%)  | 0 (0%)    | 0 (0%)  | 0 (0%)  | 0 (0%)  | 16 (100%)      | 0 (0%)  | 0 (0%)    | 0 (0%)  | 0 (0%)  | 0 (0%)  | 16 (100%)        | 0 (0%)  | 0 (0%)    | 0 (0%)  | 0 (0%)  | 0 (0%)  |
| Eczema                    | 17 (100%)                 | 0 (0%)  | 0 (0%)    | 0 (0%)  | 0 (0%)  | 0 (0%)  | 16 (100%)      | 0 (0%)  | 0 (0%)    | 0 (0%)  | 0 (0%)  | 0 (0%)  | 16 (100%)        | 0 (0%)  | 0 (0%)    | 0 (0%)  | 0 (0%)  | 0 (0%)  |
| Elevated liver enzymes    | 16 (94.12%)               | 0 (0%)  | 1 (5.88%) | 0 (0%)  | 0 (0%)  | 0 (0%)  | 16 (100%)      | 0 (0%)  | 0 (0%)    | 0 (0%)  | 0 (0%)  | 0 (0%)  | 16 (100%)        | 0 (0%)  | 0 (0%)    | 0 (0%)  | 0 (0%)  | 0 (0%)  |
| Elevated serum creatinine | 17 (100%)                 | 0 (0%)  | 0 (0%)    | 0 (0%)  | 0 (0%)  | 0 (0%)  | 16 (100%)      | 0 (0%)  | 0 (0%)    | 0 (0%)  | 0 (0%)  | 0 (0%)  | 16 (100%)        | 0 (0%)  | 0 (0%)    | 0 (0%)  | 0 (0%)  | 0 (0%)  |
| Eosinophilia              | 17 (100%)                 | 0 (0%)  | 0 (0%)    | 0 (0%)  | 0 (0%)  | 0 (0%)  | 15 (93.75%)    | 0 (0%)  | 1 (6.25%) | 0 (0%)  | 0 (0%)  | 0 (0%)  | 16 (100%)        | 0 (0%)  | 0 (0%)    | 0 (0%)  | 0 (0%)  | 0 (0%)  |
| Erythema                  | 17 (100%)                 | 0 (0%)  | 0 (0%)    | 0 (0%)  | 0 (0%)  | 0 (0%)  | 16 (100%)      | 0 (0%)  | 0 (0%)    | 0 (0%)  | 0 (0%)  | 0 (0%)  | 16 (100%)        | 0 (0%)  | 0 (0%)    | 0 (0%)  | 0 (0%)  | 0 (0%)  |

|                           | Adjuvant + AGS-V (N = 17) |         |            |           |         |         | AGS-V (N = 16) |         |           |           |         |         | Placebo (N = 16) |         |           |         |         |         |
|---------------------------|---------------------------|---------|------------|-----------|---------|---------|----------------|---------|-----------|-----------|---------|---------|------------------|---------|-----------|---------|---------|---------|
| Event                     | No Sx                     | Grade 0 | Grade 1    | Grade 2   | Grade 3 | Grade 4 | No Sx          | Grade 0 | Grade 1   | Grade 2   | Grade 3 | Grade 4 | No Sx            | Grade 0 | Grade 1   | Grade 2 | Grade 3 | Grade 4 |
| Eyelid Stye               | 17 (100%)                 | 0 (0%)  | 0 (0%)     | 0 (0%)    | 0 (0%)  | 0 (0%)  | 16 (100%)      | 0 (0%)  | 0 (0%)    | 0 (0%)    | 0 (0%)  | 0 (0%)  | 16 (100%)        | 0 (0%)  | 0 (0%)    | 0 (0%)  | 0 (0%)  | 0 (0%)  |
| Fatigue                   | 15 (88.24%)               | 0 (0%)  | 2 (11.76%) | 0 (0%)    | 0 (0%)  | 0 (0%)  | 12 (75%)       | 0 (0%)  | 4 (25%)   | 0 (0%)    | 0 (0%)  | 0 (0%)  | 16 (100%)        | 0 (0%)  | 0 (0%)    | 0 (0%)  | 0 (0%)  | 0 (0%)  |
| Fever                     | 17 (100%)                 | 0 (0%)  | 0 (0%)     | 0 (0%)    | 0 (0%)  | 0 (0%)  | 16 (100%)      | 0 (0%)  | 0 (0%)    | 0 (0%)    | 0 (0%)  | 0 (0%)  | 15 (93.75%)      | 0 (0%)  | 1 (6.25%) | 0 (0%)  | 0 (0%)  | 0 (0%)  |
| Feverish                  | 16 (94.12%)               | 0 (0%)  | 1 (5.88%)  | 0 (0%)    | 0 (0%)  | 0 (0%)  | 16 (100%)      | 0 (0%)  | 0 (0%)    | 0 (0%)    | 0 (0%)  | 0 (0%)  | 16 (100%)        | 0 (0%)  | 0 (0%)    | 0 (0%)  | 0 (0%)  | 0 (0%)  |
| Gastritis                 | 17 (100%)                 | 0 (0%)  | 0 (0%)     | 0 (0%)    | 0 (0%)  | 0 (0%)  | 16 (100%)      | 0 (0%)  | 0 (0%)    | 0 (0%)    | 0 (0%)  | 0 (0%)  | 16 (100%)        | 0 (0%)  | 0 (0%)    | 0 (0%)  | 0 (0%)  | 0 (0%)  |
| Headache                  | 12 (70.59%)               | 0 (0%)  | 4 (23.53%) | 1 (5.88%) | 0 (0%)  | 0 (0%)  | 12 (75%)       | 0 (0%)  | 2 (12.5%) | 2 (12.5%) | 0 (0%)  | 0 (0%)  | 14 (87.5%)       | 0 (0%)  | 2 (12.5%) | 0 (0%)  | 0 (0%)  | 0 (0%)  |
| Hematuria                 | 17 (100%)                 | 0 (0%)  | 0 (0%)     | 0 (0%)    | 0 (0%)  | 0 (0%)  | 16 (100%)      | 0 (0%)  | 0 (0%)    | 0 (0%)    | 0 (0%)  | 0 (0%)  | 16 (100%)        | 0 (0%)  | 0 (0%)    | 0 (0%)  | 0 (0%)  | 0 (0%)  |
| Hemoglobin decreased      | 17 (100%)                 | 0 (0%)  | 0 (0%)     | 0 (0%)    | 0 (0%)  | 0 (0%)  | 15 (93.75%)    | 0 (0%)  | 1 (6.25%) | 0 (0%)    | 0 (0%)  | 0 (0%)  | 16 (100%)        | 0 (0%)  | 0 (0%)    | 0 (0%)  | 0 (0%)  | 0 (0%)  |
| Hyperglycemia             | 17 (100%)                 | 0 (0%)  | 0 (0%)     | 0 (0%)    | 0 (0%)  | 0 (0%)  | 16 (100%)      | 0 (0%)  | 0 (0%)    | 0 (0%)    | 0 (0%)  | 0 (0%)  | 16 (100%)        | 0 (0%)  | 0 (0%)    | 0 (0%)  | 0 (0%)  | 0 (0%)  |
| Hyponatremia              | 17 (100%)                 | 0 (0%)  | 0 (0%)     | 0 (0%)    | 0 (0%)  | 0 (0%)  | 16 (100%)      | 0 (0%)  | 0 (0%)    | 0 (0%)    | 0 (0%)  | 0 (0%)  | 16 (100%)        | 0 (0%)  | 0 (0%)    | 0 (0%)  | 0 (0%)  | 0 (0%)  |
| Hypertension              | 17 (100%)                 | 0 (0%)  | 0 (0%)     | 0 (0%)    | 0 (0%)  | 0 (0%)  | 16 (100%)      | 0 (0%)  | 0 (0%)    | 0 (0%)    | 0 (0%)  | 0 (0%)  | 16 (100%)        | 0 (0%)  | 0 (0%)    | 0 (0%)  | 0 (0%)  | 0 (0%)  |
| Hypocalcemia              | 17 (100%)                 | 0 (0%)  | 0 (0%)     | 0 (0%)    | 0 (0%)  | 0 (0%)  | 16 (100%)      | 0 (0%)  | 0 (0%)    | 0 (0%)    | 0 (0%)  | 0 (0%)  | 16 (100%)        | 0 (0%)  | 0 (0%)    | 0 (0%)  | 0 (0%)  | 0 (0%)  |
| Hypoglycemia              | 17 (100%)                 | 0 (0%)  | 0 (0%)     | 0 (0%)    | 0 (0%)  | 0 (0%)  | 16 (100%)      | 0 (0%)  | 0 (0%)    | 0 (0%)    | 0 (0%)  | 0 (0%)  | 16 (100%)        | 0 (0%)  | 0 (0%)    | 0 (0%)  | 0 (0%)  | 0 (0%)  |
| Hypokalemia               | 17 (100%)                 | 0 (0%)  | 0 (0%)     | 0 (0%)    | 0 (0%)  | 0 (0%)  | 16 (100%)      | 0 (0%)  | 0 (0%)    | 0 (0%)    | 0 (0%)  | 0 (0%)  | 16 (100%)        | 0 (0%)  | 0 (0%)    | 0 (0%)  | 0 (0%)  | 0 (0%)  |
| Hyponatremia              | 17 (100%)                 | 0 (0%)  | 0 (0%)     | 0 (0%)    | 0 (0%)  | 0 (0%)  | 16 (100%)      | 0 (0%)  | 0 (0%)    | 0 (0%)    | 0 (0%)  | 0 (0%)  | 16 (100%)        | 0 (0%)  | 0 (0%)    | 0 (0%)  | 0 (0%)  | 0 (0%)  |
| Hypophosphatemia          | 17 (100%)                 | 0 (0%)  | 0 (0%)     | 0 (0%)    | 0 (0%)  | 0 (0%)  | 16 (100%)      | 0 (0%)  | 0 (0%)    | 0 (0%)    | 0 (0%)  | 0 (0%)  | 16 (100%)        | 0 (0%)  | 0 (0%)    | 0 (0%)  | 0 (0%)  | 0 (0%)  |
| Influenza                 | 17 (100%)                 | 0 (0%)  | 0 (0%)     | 0 (0%)    | 0 (0%)  | 0 (0%)  | 16 (100%)      | 0 (0%)  | 0 (0%)    | 0 (0%)    | 0 (0%)  | 0 (0%)  | 16 (100%)        | 0 (0%)  | 0 (0%)    | 0 (0%)  | 0 (0%)  | 0 (0%)  |
| Injection site erythema   | 17 (100%)                 | 0 (0%)  | 0 (0%)     | 0 (0%)    | 0 (0%)  | 0 (0%)  | 16 (100%)      | 0 (0%)  | 0 (0%)    | 0 (0%)    | 0 (0%)  | 0 (0%)  | 16 (100%)        | 0 (0%)  | 0 (0%)    | 0 (0%)  | 0 (0%)  | 0 (0%)  |
| Injection site induration | 17 (100%)                 | 0 (0%)  | 0 (0%)     | 0 (0%)    | 0 (0%)  | 0 (0%)  | 16 (100%)      | 0 (0%)  | 0 (0%)    | 0 (0%)    | 0 (0%)  | 0 (0%)  | 16 (100%)        | 0 (0%)  | 0 (0%)    | 0 (0%)  | 0 (0%)  | 0 (0%)  |
| Injection site itching    | 17 (100%)                 | 0 (0%)  | 0 (0%)     | 0 (0%)    | 0 (0%)  | 0 (0%)  | 16 (100%)      | 0 (0%)  | 0 (0%)    | 0 (0%)    | 0 (0%)  | 0 (0%)  | 16 (100%)        | 0 (0%)  | 0 (0%)    | 0 (0%)  | 0 (0%)  | 0 (0%)  |
| Injection site pain       | 17 (100%)                 | 0 (0%)  | 0 (0%)     | 0 (0%)    | 0 (0%)  | 0 (0%)  | 16 (100%)      | 0 (0%)  | 0 (0%)    | 0 (0%)    | 0 (0%)  | 0 (0%)  | 16 (100%)        | 0 (0%)  | 0 (0%)    | 0 (0%)  | 0 (0%)  | 0 (0%)  |

| Event                      | Adjuvant + AGS-V (N = 17) |         |            |         |         |         | AGS-V (N = 16) |         |           |           |         |         | Placebo (N = 16) |         |           |         |         |         |
|----------------------------|---------------------------|---------|------------|---------|---------|---------|----------------|---------|-----------|-----------|---------|---------|------------------|---------|-----------|---------|---------|---------|
|                            | No Sx                     | Grade 0 | Grade 1    | Grade 2 | Grade 3 | Grade 4 | No Sx          | Grade 0 | Grade 1   | Grade 2   | Grade 3 | Grade 4 | No Sx            | Grade 0 | Grade 1   | Grade 2 | Grade 3 | Grade 4 |
| Injection site pruritus    | 17 (100%)                 | 0 (0%)  | 0 (0%)     | 0 (0%)  | 0 (0%)  | 0 (0%)  | 16 (100%)      | 0 (0%)  | 0 (0%)    | 0 (0%)    | 0 (0%)  | 0 (0%)  | 16 (100%)        | 0 (0%)  | 0 (0%)    | 0 (0%)  | 0 (0%)  | 0 (0%)  |
| Injection site swelling    | 17 (100%)                 | 0 (0%)  | 0 (0%)     | 0 (0%)  | 0 (0%)  | 0 (0%)  | 16 (100%)      | 0 (0%)  | 0 (0%)    | 0 (0%)    | 0 (0%)  | 0 (0%)  | 16 (100%)        | 0 (0%)  | 0 (0%)    | 0 (0%)  | 0 (0%)  | 0 (0%)  |
| Injury                     | 17 (100%)                 | 0 (0%)  | 0 (0%)     | 0 (0%)  | 0 (0%)  | 0 (0%)  | 16 (100%)      | 0 (0%)  | 0 (0%)    | 0 (0%)    | 0 (0%)  | 0 (0%)  | 16 (100%)        | 0 (0%)  | 0 (0%)    | 0 (0%)  | 0 (0%)  | 0 (0%)  |
| Insect bite                | 17 (100%)                 | 0 (0%)  | 0 (0%)     | 0 (0%)  | 0 (0%)  | 0 (0%)  | 16 (100%)      | 0 (0%)  | 0 (0%)    | 0 (0%)    | 0 (0%)  | 0 (0%)  | 16 (100%)        | 0 (0%)  | 0 (0%)    | 0 (0%)  | 0 (0%)  | 0 (0%)  |
| Iron deficiency anemia     | 17 (100%)                 | 0 (0%)  | 0 (0%)     | 0 (0%)  | 0 (0%)  | 0 (0%)  | 16 (100%)      | 0 (0%)  | 0 (0%)    | 0 (0%)    | 0 (0%)  | 0 (0%)  | 16 (100%)        | 0 (0%)  | 0 (0%)    | 0 (0%)  | 0 (0%)  | 0 (0%)  |
| Knee pain                  | 17 (100%)                 | 0 (0%)  | 0 (0%)     | 0 (0%)  | 0 (0%)  | 0 (0%)  | 16 (100%)      | 0 (0%)  | 0 (0%)    | 0 (0%)    | 0 (0%)  | 0 (0%)  | 16 (100%)        | 0 (0%)  | 0 (0%)    | 0 (0%)  | 0 (0%)  | 0 (0%)  |
| Laryngitis                 | 17 (100%)                 | 0 (0%)  | 0 (0%)     | 0 (0%)  | 0 (0%)  | 0 (0%)  | 16 (100%)      | 0 (0%)  | 0 (0%)    | 0 (0%)    | 0 (0%)  | 0 (0%)  | 16 (100%)        | 0 (0%)  | 0 (0%)    | 0 (0%)  | 0 (0%)  | 0 (0%)  |
| Local swelling             | 17 (100%)                 | 0 (0%)  | 0 (0%)     | 0 (0%)  | 0 (0%)  | 0 (0%)  | 16 (100%)      | 0 (0%)  | 0 (0%)    | 0 (0%)    | 0 (0%)  | 0 (0%)  | 16 (100%)        | 0 (0%)  | 0 (0%)    | 0 (0%)  | 0 (0%)  | 0 (0%)  |
| Lymph node tenderness      | 17 (100%)                 | 0 (0%)  | 0 (0%)     | 0 (0%)  | 0 (0%)  | 0 (0%)  | 16 (100%)      | 0 (0%)  | 0 (0%)    | 0 (0%)    | 0 (0%)  | 0 (0%)  | 16 (100%)        | 0 (0%)  | 0 (0%)    | 0 (0%)  | 0 (0%)  | 0 (0%)  |
| Lymphocyte count increased | 17 (100%)                 | 0 (0%)  | 0 (0%)     | 0 (0%)  | 0 (0%)  | 0 (0%)  | 16 (100%)      | 0 (0%)  | 0 (0%)    | 0 (0%)    | 0 (0%)  | 0 (0%)  | 16 (100%)        | 0 (0%)  | 0 (0%)    | 0 (0%)  | 0 (0%)  | 0 (0%)  |
| Muscle ache                | 17 (100%)                 | 0 (0%)  | 0 (0%)     | 0 (0%)  | 0 (0%)  | 0 (0%)  | 16 (100%)      | 0 (0%)  | 0 (0%)    | 0 (0%)    | 0 (0%)  | 0 (0%)  | 16 (100%)        | 0 (0%)  | 0 (0%)    | 0 (0%)  | 0 (0%)  | 0 (0%)  |
| Muscle strain              | 17 (100%)                 | 0 (0%)  | 0 (0%)     | 0 (0%)  | 0 (0%)  | 0 (0%)  | 16 (100%)      | 0 (0%)  | 0 (0%)    | 0 (0%)    | 0 (0%)  | 0 (0%)  | 16 (100%)        | 0 (0%)  | 0 (0%)    | 0 (0%)  | 0 (0%)  | 0 (0%)  |
| Myalgia                    | 17 (100%)                 | 0 (0%)  | 0 (0%)     | 0 (0%)  | 0 (0%)  | 0 (0%)  | 14 (87.5%)     | 0 (0%)  | 1 (6.25%) | 1 (6.25%) | 0 (0%)  | 0 (0%)  | 16 (100%)        | 0 (0%)  | 0 (0%)    | 0 (0%)  | 0 (0%)  | 0 (0%)  |
| Nasal congestion           | 17 (100%)                 | 0 (0%)  | 0 (0%)     | 0 (0%)  | 0 (0%)  | 0 (0%)  | 16 (100%)      | 0 (0%)  | 0 (0%)    | 0 (0%)    | 0 (0%)  | 0 (0%)  | 16 (100%)        | 0 (0%)  | 0 (0%)    | 0 (0%)  | 0 (0%)  | 0 (0%)  |
| Nausea                     | 15 (88.24%)               | 0 (0%)  | 2 (11.76%) | 0 (0%)  | 0 (0%)  | 0 (0%)  | 16 (100%)      | 0 (0%)  | 0 (0%)    | 0 (0%)    | 0 (0%)  | 0 (0%)  | 15 (93.75%)      | 0 (0%)  | 1 (6.25%) | 0 (0%)  | 0 (0%)  | 0 (0%)  |
| Neutrophil count decreased | 17 (100%)                 | 0 (0%)  | 0 (0%)     | 0 (0%)  | 0 (0%)  | 0 (0%)  | 16 (100%)      | 0 (0%)  | 0 (0%)    | 0 (0%)    | 0 (0%)  | 0 (0%)  | 16 (100%)        | 0 (0%)  | 0 (0%)    | 0 (0%)  | 0 (0%)  | 0 (0%)  |
| Oral pain                  | 17 (100%)                 | 0 (0%)  | 0 (0%)     | 0 (0%)  | 0 (0%)  | 0 (0%)  | 16 (100%)      | 0 (0%)  | 0 (0%)    | 0 (0%)    | 0 (0%)  | 0 (0%)  | 16 (100%)        | 0 (0%)  | 0 (0%)    | 0 (0%)  | 0 (0%)  | 0 (0%)  |
| Peripheral neuropathy      | 17 (100%)                 | 0 (0%)  | 0 (0%)     | 0 (0%)  | 0 (0%)  | 0 (0%)  | 16 (100%)      | 0 (0%)  | 0 (0%)    | 0 (0%)    | 0 (0%)  | 0 (0%)  | 16 (100%)        | 0 (0%)  | 0 (0%)    | 0 (0%)  | 0 (0%)  | 0 (0%)  |
| Productive cough           | 17 (100%)                 | 0 (0%)  | 0 (0%)     | 0 (0%)  | 0 (0%)  | 0 (0%)  | 16 (100%)      | 0 (0%)  | 0 (0%)    | 0 (0%)    | 0 (0%)  | 0 (0%)  | 16 (100%)        | 0 (0%)  | 0 (0%)    | 0 (0%)  | 0 (0%)  | 0 (0%)  |
| Pruritic rash              | 17 (100%)                 | 0 (0%)  | 0 (0%)     | 0 (0%)  | 0 (0%)  | 0 (0%)  | 16 (100%)      | 0 (0%)  | 0 (0%)    | 0 (0%)    | 0 (0%)  | 0 (0%)  | 16 (100%)        | 0 (0%)  | 0 (0%)    | 0 (0%)  | 0 (0%)  | 0 (0%)  |
| Pruritus                   | 17 (100%)                 | 0 (0%)  | 0 (0%)     | 0 (0%)  | 0 (0%)  | 0 (0%)  | 16 (100%)      | 0 (0%)  | 0 (0%)    | 0 (0%)    | 0 (0%)  | 0 (0%)  | 16 (100%)        | 0 (0%)  | 0 (0%)    | 0 (0%)  | 0 (0%)  | 0 (0%)  |

|                                   | Adjuvant + AGS-V (N = 17) |         |         |         |           |         | AGS-V (N = 16) |         |           |         |         |         | Placebo (N = 16) |         |           |         |         |         |
|-----------------------------------|---------------------------|---------|---------|---------|-----------|---------|----------------|---------|-----------|---------|---------|---------|------------------|---------|-----------|---------|---------|---------|
| Event                             | No Sx                     | Grade 0 | Grade 1 | Grade 2 | Grade 3   | Grade 4 | No Sx          | Grade 0 | Grade 1   | Grade 2 | Grade 3 | Grade 4 | No Sx            | Grade 0 | Grade 1   | Grade 2 | Grade 3 | Grade 4 |
| Rash                              | 17 (100%)                 | 0 (0%)  | 0 (0%)  | 0 (0%)  | 0 (0%)    | 0 (0%)  | 16 (100%)      | 0 (0%)  | 0 (0%)    | 0 (0%)  | 0 (0%)  | 0 (0%)  | 14 (87.5%)       | 0 (0%)  | 2 (12.5%) | 0 (0%)  | 0 (0%)  | 0 (0%)  |
| Rhinorrhea                        | 17 (100%)                 | 0 (0%)  | 0 (0%)  | 0 (0%)  | 0 (0%)    | 0 (0%)  | 16 (100%)      | 0 (0%)  | 0 (0%)    | 0 (0%)  | 0 (0%)  | 0 (0%)  | 16 (100%)        | 0 (0%)  | 0 (0%)    | 0 (0%)  | 0 (0%)  | 0 (0%)  |
| Sinusitis                         | 17 (100%)                 | 0 (0%)  | 0 (0%)  | 0 (0%)  | 0 (0%)    | 0 (0%)  | 16 (100%)      | 0 (0%)  | 0 (0%)    | 0 (0%)  | 0 (0%)  | 0 (0%)  | 16 (100%)        | 0 (0%)  | 0 (0%)    | 0 (0%)  | 0 (0%)  | 0 (0%)  |
| Skin hyperpigmentation            | 17 (100%)                 | 0 (0%)  | 0 (0%)  | 0 (0%)  | 0 (0%)    | 0 (0%)  | 15 (93.75%)    | 0 (0%)  | 1 (6.25%) | 0 (0%)  | 0 (0%)  | 0 (0%)  | 16 (100%)        | 0 (0%)  | 0 (0%)    | 0 (0%)  | 0 (0%)  | 0 (0%)  |
| Skin induration                   | 17 (100%)                 | 0 (0%)  | 0 (0%)  | 0 (0%)  | 0 (0%)    | 0 (0%)  | 16 (100%)      | 0 (0%)  | 0 (0%)    | 0 (0%)  | 0 (0%)  | 0 (0%)  | 16 (100%)        | 0 (0%)  | 0 (0%)    | 0 (0%)  | 0 (0%)  | 0 (0%)  |
| Sore throat                       | 17 (100%)                 | 0 (0%)  | 0 (0%)  | 0 (0%)  | 0 (0%)    | 0 (0%)  | 16 (100%)      | 0 (0%)  | 0 (0%)    | 0 (0%)  | 0 (0%)  | 0 (0%)  | 16 (100%)        | 0 (0%)  | 0 (0%)    | 0 (0%)  | 0 (0%)  | 0 (0%)  |
| Systolic hypertension             | 17 (100%)                 | 0 (0%)  | 0 (0%)  | 0 (0%)  | 0 (0%)    | 0 (0%)  | 16 (100%)      | 0 (0%)  | 0 (0%)    | 0 (0%)  | 0 (0%)  | 0 (0%)  | 16 (100%)        | 0 (0%)  | 0 (0%)    | 0 (0%)  | 0 (0%)  | 0 (0%)  |
| Tenderness                        | 17 (100%)                 | 0 (0%)  | 0 (0%)  | 0 (0%)  | 0 (0%)    | 0 (0%)  | 16 (100%)      | 0 (0%)  | 0 (0%)    | 0 (0%)  | 0 (0%)  | 0 (0%)  | 16 (100%)        | 0 (0%)  | 0 (0%)    | 0 (0%)  | 0 (0%)  | 0 (0%)  |
| Tooth extraction                  | 17 (100%)                 | 0 (0%)  | 0 (0%)  | 0 (0%)  | 0 (0%)    | 0 (0%)  | 16 (100%)      | 0 (0%)  | 0 (0%)    | 0 (0%)  | 0 (0%)  | 0 (0%)  | 16 (100%)        | 0 (0%)  | 0 (0%)    | 0 (0%)  | 0 (0%)  | 0 (0%)  |
| Torn bicep tendon                 | 17 (100%)                 | 0 (0%)  | 0 (0%)  | 0 (0%)  | 0 (0%)    | 0 (0%)  | 16 (100%)      | 0 (0%)  | 0 (0%)    | 0 (0%)  | 0 (0%)  | 0 (0%)  | 16 (100%)        | 0 (0%)  | 0 (0%)    | 0 (0%)  | 0 (0%)  | 0 (0%)  |
| Upper respiratory tract infection | 17 (100%)                 | 0 (0%)  | 0 (0%)  | 0 (0%)  | 0 (0%)    | 0 (0%)  | 16 (100%)      | 0 (0%)  | 0 (0%)    | 0 (0%)  | 0 (0%)  | 0 (0%)  | 16 (100%)        | 0 (0%)  | 0 (0%)    | 0 (0%)  | 0 (0%)  | 0 (0%)  |
| Urinary frequency                 | 17 (100%)                 | 0 (0%)  | 0 (0%)  | 0 (0%)  | 0 (0%)    | 0 (0%)  | 16 (100%)      | 0 (0%)  | 0 (0%)    | 0 (0%)  | 0 (0%)  | 0 (0%)  | 16 (100%)        | 0 (0%)  | 0 (0%)    | 0 (0%)  | 0 (0%)  | 0 (0%)  |
| Urinary tract infection           | 17 (100%)                 | 0 (0%)  | 0 (0%)  | 0 (0%)  | 0 (0%)    | 0 (0%)  | 16 (100%)      | 0 (0%)  | 0 (0%)    | 0 (0%)  | 0 (0%)  | 0 (0%)  | 16 (100%)        | 0 (0%)  | 0 (0%)    | 0 (0%)  | 0 (0%)  | 0 (0%)  |
| Urine WBC increased               | 17 (100%)                 | 0 (0%)  | 0 (0%)  | 0 (0%)  | 0 (0%)    | 0 (0%)  | 16 (100%)      | 0 (0%)  | 0 (0%)    | 0 (0%)  | 0 (0%)  | 0 (0%)  | 16 (100%)        | 0 (0%)  | 0 (0%)    | 0 (0%)  | 0 (0%)  | 0 (0%)  |
| Urticaria                         | 16 (94.12%)               | 0 (0%)  | 0 (0%)  | 0 (0%)  | 1 (5.88%) | 0 (0%)  | 16 (100%)      | 0 (0%)  | 0 (0%)    | 0 (0%)  | 0 (0%)  | 0 (0%)  | 16 (100%)        | 0 (0%)  | 0 (0%)    | 0 (0%)  | 0 (0%)  | 0 (0%)  |
| Vertigo                           | 17 (100%)                 | 0 (0%)  | 0 (0%)  | 0 (0%)  | 0 (0%)    | 0 (0%)  | 16 (100%)      | 0 (0%)  | 0 (0%)    | 0 (0%)  | 0 (0%)  | 0 (0%)  | 16 (100%)        | 0 (0%)  | 0 (0%)    | 0 (0%)  | 0 (0%)  | 0 (0%)  |
| Vitamin D deficiency              | 17 (100%)                 | 0 (0%)  | 0 (0%)  | 0 (0%)  | 0 (0%)    | 0 (0%)  | 16 (100%)      | 0 (0%)  | 0 (0%)    | 0 (0%)  | 0 (0%)  | 0 (0%)  | 16 (100%)        | 0 (0%)  | 0 (0%)    | 0 (0%)  | 0 (0%)  | 0 (0%)  |
| Vomiting                          | 17 (100%)                 | 0 (0%)  | 0 (0%)  | 0 (0%)  | 0 (0%)    | 0 (0%)  | 16 (100%)      | 0 (0%)  | 0 (0%)    | 0 (0%)  | 0 (0%)  | 0 (0%)  | 16 (100%)        | 0 (0%)  | 0 (0%)    | 0 (0%)  | 0 (0%)  | 0 (0%)  |
| WBC decreased                     | 17 (100%)                 | 0 (0%)  | 0 (0%)  | 0 (0%)  | 0 (0%)    | 0 (0%)  | 16 (100%)      | 0 (0%)  | 0 (0%)    | 0 (0%)  | 0 (0%)  | 0 (0%)  | 15 (93.75%)      | 0 (0%)  | 1 (6.25%) | 0 (0%)  | 0 (0%)  | 0 (0%)  |
| WBC increased                     | 17 (100%)                 | 0 (0%)  | 0 (0%)  | 0 (0%)  | 0 (0%)    | 0 (0%)  | 16 (100%)      | 0 (0%)  | 0 (0%)    | 0 (0%)  | 0 (0%)  | 0 (0%)  | 16 (100%)        | 0 (0%)  | 0 (0%)    | 0 (0%)  | 0 (0%)  | 0 (0%)  |



**Table 11 : Occurrence of Max Grade Events Per Subject which are Probably Related to Treatment by Treatment Group**

| Event                                | Adjuvant + AGS-V (N = 17) |         |         |               |         |         | AGS-V (N = 16) |         |              |         |         |         | Placebo (N = 16) |         |         |         |         |         |
|--------------------------------------|---------------------------|---------|---------|---------------|---------|---------|----------------|---------|--------------|---------|---------|---------|------------------|---------|---------|---------|---------|---------|
|                                      | No Sx                     | Grade 0 | Grade 1 | Grade 2       | Grade 3 | Grade 4 | No Sx          | Grade 0 | Grade 1      | Grade 2 | Grade 3 | Grade 4 | No Sx            | Grade 0 | Grade 1 | Grade 2 | Grade 3 | Grade 4 |
| Abdominal cramps                     | 17<br>(100%)              | 0 (0%)  | 0 (0%)  | 0 (0%)        | 0 (0%)  | 0 (0%)  | 16<br>(100%)   | 0 (0%)  | 0 (0%)       | 0 (0%)  | 0 (0%)  | 0 (0%)  | 16<br>(100%)     | 0 (0%)  | 0 (0%)  | 0 (0%)  | 0 (0%)  | 0 (0%)  |
| Abdominal pain                       | 17<br>(100%)              | 0 (0%)  | 0 (0%)  | 0 (0%)        | 0 (0%)  | 0 (0%)  | 16<br>(100%)   | 0 (0%)  | 0 (0%)       | 0 (0%)  | 0 (0%)  | 0 (0%)  | 16<br>(100%)     | 0 (0%)  | 0 (0%)  | 0 (0%)  | 0 (0%)  | 0 (0%)  |
| Absolute neutrophil count, decreased | 17<br>(100%)              | 0 (0%)  | 0 (0%)  | 0 (0%)        | 0 (0%)  | 0 (0%)  | 16<br>(100%)   | 0 (0%)  | 0 (0%)       | 0 (0%)  | 0 (0%)  | 0 (0%)  | 16<br>(100%)     | 0 (0%)  | 0 (0%)  | 0 (0%)  | 0 (0%)  | 0 (0%)  |
| Acute sinusitis                      | 17<br>(100%)              | 0 (0%)  | 0 (0%)  | 0 (0%)        | 0 (0%)  | 0 (0%)  | 16<br>(100%)   | 0 (0%)  | 0 (0%)       | 0 (0%)  | 0 (0%)  | 0 (0%)  | 16<br>(100%)     | 0 (0%)  | 0 (0%)  | 0 (0%)  | 0 (0%)  | 0 (0%)  |
| ALT increased                        | 17<br>(100%)              | 0 (0%)  | 0 (0%)  | 0 (0%)        | 0 (0%)  | 0 (0%)  | 16<br>(100%)   | 0 (0%)  | 0 (0%)       | 0 (0%)  | 0 (0%)  | 0 (0%)  | 16<br>(100%)     | 0 (0%)  | 0 (0%)  | 0 (0%)  | 0 (0%)  | 0 (0%)  |
| Anxiety                              | 17<br>(100%)              | 0 (0%)  | 0 (0%)  | 0 (0%)        | 0 (0%)  | 0 (0%)  | 16<br>(100%)   | 0 (0%)  | 0 (0%)       | 0 (0%)  | 0 (0%)  | 0 (0%)  | 16<br>(100%)     | 0 (0%)  | 0 (0%)  | 0 (0%)  | 0 (0%)  | 0 (0%)  |
| Arthralgia                           | 15<br>(88.24%)            | 0 (0%)  | 0 (0%)  | 2<br>(11.76%) | 0 (0%)  | 0 (0%)  | 16<br>(100%)   | 0 (0%)  | 0 (0%)       | 0 (0%)  | 0 (0%)  | 0 (0%)  | 16<br>(100%)     | 0 (0%)  | 0 (0%)  | 0 (0%)  | 0 (0%)  | 0 (0%)  |
| AST increased                        | 17<br>(100%)              | 0 (0%)  | 0 (0%)  | 0 (0%)        | 0 (0%)  | 0 (0%)  | 16<br>(100%)   | 0 (0%)  | 0 (0%)       | 0 (0%)  | 0 (0%)  | 0 (0%)  | 16<br>(100%)     | 0 (0%)  | 0 (0%)  | 0 (0%)  | 0 (0%)  | 0 (0%)  |
| Bilirubin total high                 | 17<br>(100%)              | 0 (0%)  | 0 (0%)  | 0 (0%)        | 0 (0%)  | 0 (0%)  | 16<br>(100%)   | 0 (0%)  | 0 (0%)       | 0 (0%)  | 0 (0%)  | 0 (0%)  | 16<br>(100%)     | 0 (0%)  | 0 (0%)  | 0 (0%)  | 0 (0%)  | 0 (0%)  |
| Blood eosinophils increased          | 17<br>(100%)              | 0 (0%)  | 0 (0%)  | 0 (0%)        | 0 (0%)  | 0 (0%)  | 16<br>(100%)   | 0 (0%)  | 0 (0%)       | 0 (0%)  | 0 (0%)  | 0 (0%)  | 16<br>(100%)     | 0 (0%)  | 0 (0%)  | 0 (0%)  | 0 (0%)  | 0 (0%)  |
| Bradycardia                          | 17<br>(100%)              | 0 (0%)  | 0 (0%)  | 0 (0%)        | 0 (0%)  | 0 (0%)  | 16<br>(100%)   | 0 (0%)  | 0 (0%)       | 0 (0%)  | 0 (0%)  | 0 (0%)  | 16<br>(100%)     | 0 (0%)  | 0 (0%)  | 0 (0%)  | 0 (0%)  | 0 (0%)  |
| BUN increased                        | 17<br>(100%)              | 0 (0%)  | 0 (0%)  | 0 (0%)        | 0 (0%)  | 0 (0%)  | 16<br>(100%)   | 0 (0%)  | 0 (0%)       | 0 (0%)  | 0 (0%)  | 0 (0%)  | 16<br>(100%)     | 0 (0%)  | 0 (0%)  | 0 (0%)  | 0 (0%)  | 0 (0%)  |
| Campylobacter                        | 17<br>(100%)              | 0 (0%)  | 0 (0%)  | 0 (0%)        | 0 (0%)  | 0 (0%)  | 16<br>(100%)   | 0 (0%)  | 0 (0%)       | 0 (0%)  | 0 (0%)  | 0 (0%)  | 16<br>(100%)     | 0 (0%)  | 0 (0%)  | 0 (0%)  | 0 (0%)  | 0 (0%)  |
| Candida vaginitis                    | 17<br>(100%)              | 0 (0%)  | 0 (0%)  | 0 (0%)        | 0 (0%)  | 0 (0%)  | 16<br>(100%)   | 0 (0%)  | 0 (0%)       | 0 (0%)  | 0 (0%)  | 0 (0%)  | 16<br>(100%)     | 0 (0%)  | 0 (0%)  | 0 (0%)  | 0 (0%)  | 0 (0%)  |
| Chills                               | 14<br>(82.35%)            | 0 (0%)  | 0 (0%)  | 3<br>(17.65%) | 0 (0%)  | 0 (0%)  | 15<br>(93.75%) | 0 (0%)  | 1<br>(6.25%) | 0 (0%)  | 0 (0%)  | 0 (0%)  | 16<br>(100%)     | 0 (0%)  | 0 (0%)  | 0 (0%)  | 0 (0%)  | 0 (0%)  |
| Common cold                          | 17<br>(100%)              | 0 (0%)  | 0 (0%)  | 0 (0%)        | 0 (0%)  | 0 (0%)  | 16<br>(100%)   | 0 (0%)  | 0 (0%)       | 0 (0%)  | 0 (0%)  | 0 (0%)  | 16<br>(100%)     | 0 (0%)  | 0 (0%)  | 0 (0%)  | 0 (0%)  | 0 (0%)  |

| Event                     | Adjuvant + AGS-V (N = 17) |         |            |            |         |         | AGS-V (N = 16) |         |           |         |         |         | Placebo (N = 16) |         |           |           |         |         |
|---------------------------|---------------------------|---------|------------|------------|---------|---------|----------------|---------|-----------|---------|---------|---------|------------------|---------|-----------|-----------|---------|---------|
|                           | No Sx                     | Grade 0 | Grade 1    | Grade 2    | Grade 3 | Grade 4 | No Sx          | Grade 0 | Grade 1   | Grade 2 | Grade 3 | Grade 4 | No Sx            | Grade 0 | Grade 1   | Grade 2   | Grade 3 | Grade 4 |
| Constipation              | 17 (100%)                 | 0 (0%)  | 0 (0%)     | 0 (0%)     | 0 (0%)  | 0 (0%)  | 16 (100%)      | 0 (0%)  | 0 (0%)    | 0 (0%)  | 0 (0%)  | 0 (0%)  | 16 (100%)        | 0 (0%)  | 0 (0%)    | 0 (0%)    | 0 (0%)  | 0 (0%)  |
| Coryza                    | 17 (100%)                 | 0 (0%)  | 0 (0%)     | 0 (0%)     | 0 (0%)  | 0 (0%)  | 16 (100%)      | 0 (0%)  | 0 (0%)    | 0 (0%)  | 0 (0%)  | 0 (0%)  | 16 (100%)        | 0 (0%)  | 0 (0%)    | 0 (0%)    | 0 (0%)  | 0 (0%)  |
| CPK increased             | 17 (100%)                 | 0 (0%)  | 0 (0%)     | 0 (0%)     | 0 (0%)  | 0 (0%)  | 16 (100%)      | 0 (0%)  | 0 (0%)    | 0 (0%)  | 0 (0%)  | 0 (0%)  | 16 (100%)        | 0 (0%)  | 0 (0%)    | 0 (0%)    | 0 (0%)  | 0 (0%)  |
| Creatine kinase           | 17 (100%)                 | 0 (0%)  | 0 (0%)     | 0 (0%)     | 0 (0%)  | 0 (0%)  | 16 (100%)      | 0 (0%)  | 0 (0%)    | 0 (0%)  | 0 (0%)  | 0 (0%)  | 16 (100%)        | 0 (0%)  | 0 (0%)    | 0 (0%)    | 0 (0%)  | 0 (0%)  |
| Creatine kinase high      | 17 (100%)                 | 0 (0%)  | 0 (0%)     | 0 (0%)     | 0 (0%)  | 0 (0%)  | 16 (100%)      | 0 (0%)  | 0 (0%)    | 0 (0%)  | 0 (0%)  | 0 (0%)  | 16 (100%)        | 0 (0%)  | 0 (0%)    | 0 (0%)    | 0 (0%)  | 0 (0%)  |
| Creatinine increased      | 17 (100%)                 | 0 (0%)  | 0 (0%)     | 0 (0%)     | 0 (0%)  | 0 (0%)  | 16 (100%)      | 0 (0%)  | 0 (0%)    | 0 (0%)  | 0 (0%)  | 0 (0%)  | 16 (100%)        | 0 (0%)  | 0 (0%)    | 0 (0%)    | 0 (0%)  | 0 (0%)  |
| Dermatitis                | 17 (100%)                 | 0 (0%)  | 0 (0%)     | 0 (0%)     | 0 (0%)  | 0 (0%)  | 16 (100%)      | 0 (0%)  | 0 (0%)    | 0 (0%)  | 0 (0%)  | 0 (0%)  | 16 (100%)        | 0 (0%)  | 0 (0%)    | 0 (0%)    | 0 (0%)  | 0 (0%)  |
| Diaphoresis               | 16 (94.12%)               | 0 (0%)  | 0 (0%)     | 1 (5.88%)  | 0 (0%)  | 0 (0%)  | 16 (100%)      | 0 (0%)  | 0 (0%)    | 0 (0%)  | 0 (0%)  | 0 (0%)  | 15 (93.75%)      | 0 (0%)  | 1 (6.25%) | 0 (0%)    | 0 (0%)  | 0 (0%)  |
| Diarrhea                  | 17 (100%)                 | 0 (0%)  | 0 (0%)     | 0 (0%)     | 0 (0%)  | 0 (0%)  | 16 (100%)      | 0 (0%)  | 0 (0%)    | 0 (0%)  | 0 (0%)  | 0 (0%)  | 16 (100%)        | 0 (0%)  | 0 (0%)    | 0 (0%)    | 0 (0%)  | 0 (0%)  |
| Difficulty sleeping       | 17 (100%)                 | 0 (0%)  | 0 (0%)     | 0 (0%)     | 0 (0%)  | 0 (0%)  | 16 (100%)      | 0 (0%)  | 0 (0%)    | 0 (0%)  | 0 (0%)  | 0 (0%)  | 16 (100%)        | 0 (0%)  | 0 (0%)    | 0 (0%)    | 0 (0%)  | 0 (0%)  |
| Dry cough                 | 17 (100%)                 | 0 (0%)  | 0 (0%)     | 0 (0%)     | 0 (0%)  | 0 (0%)  | 16 (100%)      | 0 (0%)  | 0 (0%)    | 0 (0%)  | 0 (0%)  | 0 (0%)  | 16 (100%)        | 0 (0%)  | 0 (0%)    | 0 (0%)    | 0 (0%)  | 0 (0%)  |
| Eczema                    | 17 (100%)                 | 0 (0%)  | 0 (0%)     | 0 (0%)     | 0 (0%)  | 0 (0%)  | 16 (100%)      | 0 (0%)  | 0 (0%)    | 0 (0%)  | 0 (0%)  | 0 (0%)  | 16 (100%)        | 0 (0%)  | 0 (0%)    | 0 (0%)    | 0 (0%)  | 0 (0%)  |
| Elevated liver enzymes    | 17 (100%)                 | 0 (0%)  | 0 (0%)     | 0 (0%)     | 0 (0%)  | 0 (0%)  | 16 (100%)      | 0 (0%)  | 0 (0%)    | 0 (0%)  | 0 (0%)  | 0 (0%)  | 16 (100%)        | 0 (0%)  | 0 (0%)    | 0 (0%)    | 0 (0%)  | 0 (0%)  |
| Elevated serum creatinine | 17 (100%)                 | 0 (0%)  | 0 (0%)     | 0 (0%)     | 0 (0%)  | 0 (0%)  | 16 (100%)      | 0 (0%)  | 0 (0%)    | 0 (0%)  | 0 (0%)  | 0 (0%)  | 16 (100%)        | 0 (0%)  | 0 (0%)    | 0 (0%)    | 0 (0%)  | 0 (0%)  |
| Eosinophilia              | 17 (100%)                 | 0 (0%)  | 0 (0%)     | 0 (0%)     | 0 (0%)  | 0 (0%)  | 16 (100%)      | 0 (0%)  | 0 (0%)    | 0 (0%)  | 0 (0%)  | 0 (0%)  | 16 (100%)        | 0 (0%)  | 0 (0%)    | 0 (0%)    | 0 (0%)  | 0 (0%)  |
| Erythema                  | 16 (94.12%)               | 0 (0%)  | 0 (0%)     | 1 (5.88%)  | 0 (0%)  | 0 (0%)  | 16 (100%)      | 0 (0%)  | 0 (0%)    | 0 (0%)  | 0 (0%)  | 0 (0%)  | 16 (100%)        | 0 (0%)  | 0 (0%)    | 0 (0%)    | 0 (0%)  | 0 (0%)  |
| Eyelid Styte              | 17 (100%)                 | 0 (0%)  | 0 (0%)     | 0 (0%)     | 0 (0%)  | 0 (0%)  | 16 (100%)      | 0 (0%)  | 0 (0%)    | 0 (0%)  | 0 (0%)  | 0 (0%)  | 16 (100%)        | 0 (0%)  | 0 (0%)    | 0 (0%)    | 0 (0%)  | 0 (0%)  |
| Fatigue                   | 11 (64.71%)               | 0 (0%)  | 3 (17.65%) | 3 (17.65%) | 0 (0%)  | 0 (0%)  | 14 (87.5%)     | 0 (0%)  | 2 (12.5%) | 0 (0%)  | 0 (0%)  | 0 (0%)  | 14 (87.5%)       | 0 (0%)  | 1 (6.25%) | 1 (6.25%) | 0 (0%)  | 0 (0%)  |
| Fever                     | 16 (94.12%)               | 0 (0%)  | 0 (0%)     | 1 (5.88%)  | 0 (0%)  | 0 (0%)  | 16 (100%)      | 0 (0%)  | 0 (0%)    | 0 (0%)  | 0 (0%)  | 0 (0%)  | 15 (93.75%)      | 0 (0%)  | 1 (6.25%) | 0 (0%)    | 0 (0%)  | 0 (0%)  |
| Feverish                  | 12 (70.59%)               | 0 (0%)  | 2 (11.76%) | 3 (17.65%) | 0 (0%)  | 0 (0%)  | 15 (93.75%)    | 0 (0%)  | 1 (6.25%) | 0 (0%)  | 0 (0%)  | 0 (0%)  | 15 (93.75%)      | 0 (0%)  | 1 (6.25%) | 0 (0%)    | 0 (0%)  | 0 (0%)  |
| Gastritis                 | 17 (100%)                 | 0 (0%)  | 0 (0%)     | 0 (0%)     | 0 (0%)  | 0 (0%)  | 16 (100%)      | 0 (0%)  | 0 (0%)    | 0 (0%)  | 0 (0%)  | 0 (0%)  | 16 (100%)        | 0 (0%)  | 0 (0%)    | 0 (0%)    | 0 (0%)  | 0 (0%)  |

| Event                     | Adjuvant + AGS-V (N = 17) |         |               |               |         |         | AGS-V (N = 16) |         |              |         |         |         | Placebo (N = 16) |         |         |         |         |         |
|---------------------------|---------------------------|---------|---------------|---------------|---------|---------|----------------|---------|--------------|---------|---------|---------|------------------|---------|---------|---------|---------|---------|
|                           | No Sx                     | Grade 0 | Grade 1       | Grade 2       | Grade 3 | Grade 4 | No Sx          | Grade 0 | Grade 1      | Grade 2 | Grade 3 | Grade 4 | No Sx            | Grade 0 | Grade 1 | Grade 2 | Grade 3 | Grade 4 |
| Headache                  | 13<br>(76.47%)            | 0 (0%)  | 2<br>(11.76%) | 2<br>(11.76%) | 0 (0%)  | 0 (0%)  | 15<br>(93.75%) | 0 (0%)  | 1<br>(6.25%) | 0 (0%)  | 0 (0%)  | 0 (0%)  | 16<br>(100%)     | 0 (0%)  | 0 (0%)  | 0 (0%)  | 0 (0%)  | 0 (0%)  |
| Hematuria                 | 17<br>(100%)              | 0 (0%)  | 0 (0%)        | 0 (0%)        | 0 (0%)  | 0 (0%)  | 16<br>(100%)   | 0 (0%)  | 0 (0%)       | 0 (0%)  | 0 (0%)  | 0 (0%)  | 16<br>(100%)     | 0 (0%)  | 0 (0%)  | 0 (0%)  | 0 (0%)  | 0 (0%)  |
| Hemoglobin decreased      | 17<br>(100%)              | 0 (0%)  | 0 (0%)        | 0 (0%)        | 0 (0%)  | 0 (0%)  | 16<br>(100%)   | 0 (0%)  | 0 (0%)       | 0 (0%)  | 0 (0%)  | 0 (0%)  | 16<br>(100%)     | 0 (0%)  | 0 (0%)  | 0 (0%)  | 0 (0%)  | 0 (0%)  |
| Hyperglycemia             | 17<br>(100%)              | 0 (0%)  | 0 (0%)        | 0 (0%)        | 0 (0%)  | 0 (0%)  | 16<br>(100%)   | 0 (0%)  | 0 (0%)       | 0 (0%)  | 0 (0%)  | 0 (0%)  | 16<br>(100%)     | 0 (0%)  | 0 (0%)  | 0 (0%)  | 0 (0%)  | 0 (0%)  |
| Hypnatremia               | 17<br>(100%)              | 0 (0%)  | 0 (0%)        | 0 (0%)        | 0 (0%)  | 0 (0%)  | 16<br>(100%)   | 0 (0%)  | 0 (0%)       | 0 (0%)  | 0 (0%)  | 0 (0%)  | 16<br>(100%)     | 0 (0%)  | 0 (0%)  | 0 (0%)  | 0 (0%)  | 0 (0%)  |
| Hypertension              | 17<br>(100%)              | 0 (0%)  | 0 (0%)        | 0 (0%)        | 0 (0%)  | 0 (0%)  | 16<br>(100%)   | 0 (0%)  | 0 (0%)       | 0 (0%)  | 0 (0%)  | 0 (0%)  | 16<br>(100%)     | 0 (0%)  | 0 (0%)  | 0 (0%)  | 0 (0%)  | 0 (0%)  |
| Hypocalcemia              | 17<br>(100%)              | 0 (0%)  | 0 (0%)        | 0 (0%)        | 0 (0%)  | 0 (0%)  | 16<br>(100%)   | 0 (0%)  | 0 (0%)       | 0 (0%)  | 0 (0%)  | 0 (0%)  | 16<br>(100%)     | 0 (0%)  | 0 (0%)  | 0 (0%)  | 0 (0%)  | 0 (0%)  |
| Hypoglycemia              | 17<br>(100%)              | 0 (0%)  | 0 (0%)        | 0 (0%)        | 0 (0%)  | 0 (0%)  | 16<br>(100%)   | 0 (0%)  | 0 (0%)       | 0 (0%)  | 0 (0%)  | 0 (0%)  | 16<br>(100%)     | 0 (0%)  | 0 (0%)  | 0 (0%)  | 0 (0%)  | 0 (0%)  |
| Hypokalemia               | 17<br>(100%)              | 0 (0%)  | 0 (0%)        | 0 (0%)        | 0 (0%)  | 0 (0%)  | 16<br>(100%)   | 0 (0%)  | 0 (0%)       | 0 (0%)  | 0 (0%)  | 0 (0%)  | 16<br>(100%)     | 0 (0%)  | 0 (0%)  | 0 (0%)  | 0 (0%)  | 0 (0%)  |
| Hyponatremia              | 17<br>(100%)              | 0 (0%)  | 0 (0%)        | 0 (0%)        | 0 (0%)  | 0 (0%)  | 16<br>(100%)   | 0 (0%)  | 0 (0%)       | 0 (0%)  | 0 (0%)  | 0 (0%)  | 16<br>(100%)     | 0 (0%)  | 0 (0%)  | 0 (0%)  | 0 (0%)  | 0 (0%)  |
| Hypophosphatemia          | 17<br>(100%)              | 0 (0%)  | 0 (0%)        | 0 (0%)        | 0 (0%)  | 0 (0%)  | 16<br>(100%)   | 0 (0%)  | 0 (0%)       | 0 (0%)  | 0 (0%)  | 0 (0%)  | 16<br>(100%)     | 0 (0%)  | 0 (0%)  | 0 (0%)  | 0 (0%)  | 0 (0%)  |
| Influenza                 | 17<br>(100%)              | 0 (0%)  | 0 (0%)        | 0 (0%)        | 0 (0%)  | 0 (0%)  | 16<br>(100%)   | 0 (0%)  | 0 (0%)       | 0 (0%)  | 0 (0%)  | 0 (0%)  | 16<br>(100%)     | 0 (0%)  | 0 (0%)  | 0 (0%)  | 0 (0%)  | 0 (0%)  |
| Injection site erythema   | 17<br>(100%)              | 0 (0%)  | 0 (0%)        | 0 (0%)        | 0 (0%)  | 0 (0%)  | 16<br>(100%)   | 0 (0%)  | 0 (0%)       | 0 (0%)  | 0 (0%)  | 0 (0%)  | 16<br>(100%)     | 0 (0%)  | 0 (0%)  | 0 (0%)  | 0 (0%)  | 0 (0%)  |
| Injection site induration | 17<br>(100%)              | 0 (0%)  | 0 (0%)        | 0 (0%)        | 0 (0%)  | 0 (0%)  | 16<br>(100%)   | 0 (0%)  | 0 (0%)       | 0 (0%)  | 0 (0%)  | 0 (0%)  | 16<br>(100%)     | 0 (0%)  | 0 (0%)  | 0 (0%)  | 0 (0%)  | 0 (0%)  |
| Injection site itching    | 16<br>(94.12%)            | 0 (0%)  | 1<br>(5.88%)  | 0 (0%)        | 0 (0%)  | 0 (0%)  | 16<br>(100%)   | 0 (0%)  | 0 (0%)       | 0 (0%)  | 0 (0%)  | 0 (0%)  | 16<br>(100%)     | 0 (0%)  | 0 (0%)  | 0 (0%)  | 0 (0%)  | 0 (0%)  |
| Injection site pain       | 17<br>(100%)              | 0 (0%)  | 0 (0%)        | 0 (0%)        | 0 (0%)  | 0 (0%)  | 16<br>(100%)   | 0 (0%)  | 0 (0%)       | 0 (0%)  | 0 (0%)  | 0 (0%)  | 16<br>(100%)     | 0 (0%)  | 0 (0%)  | 0 (0%)  | 0 (0%)  | 0 (0%)  |
| Injection site pruritus   | 17<br>(100%)              | 0 (0%)  | 0 (0%)        | 0 (0%)        | 0 (0%)  | 0 (0%)  | 16<br>(100%)   | 0 (0%)  | 0 (0%)       | 0 (0%)  | 0 (0%)  | 0 (0%)  | 16<br>(100%)     | 0 (0%)  | 0 (0%)  | 0 (0%)  | 0 (0%)  | 0 (0%)  |
| Injection site swelling   | 17<br>(100%)              | 0 (0%)  | 0 (0%)        | 0 (0%)        | 0 (0%)  | 0 (0%)  | 16<br>(100%)   | 0 (0%)  | 0 (0%)       | 0 (0%)  | 0 (0%)  | 0 (0%)  | 16<br>(100%)     | 0 (0%)  | 0 (0%)  | 0 (0%)  | 0 (0%)  | 0 (0%)  |
| Injury                    | 17<br>(100%)              | 0 (0%)  | 0 (0%)        | 0 (0%)        | 0 (0%)  | 0 (0%)  | 16<br>(100%)   | 0 (0%)  | 0 (0%)       | 0 (0%)  | 0 (0%)  | 0 (0%)  | 16<br>(100%)     | 0 (0%)  | 0 (0%)  | 0 (0%)  | 0 (0%)  | 0 (0%)  |
| Insect bite               | 17<br>(100%)              | 0 (0%)  | 0 (0%)        | 0 (0%)        | 0 (0%)  | 0 (0%)  | 16<br>(100%)   | 0 (0%)  | 0 (0%)       | 0 (0%)  | 0 (0%)  | 0 (0%)  | 16<br>(100%)     | 0 (0%)  | 0 (0%)  | 0 (0%)  | 0 (0%)  | 0 (0%)  |
| Iron deficiency anemia    | 17<br>(100%)              | 0 (0%)  | 0 (0%)        | 0 (0%)        | 0 (0%)  | 0 (0%)  | 16<br>(100%)   | 0 (0%)  | 0 (0%)       | 0 (0%)  | 0 (0%)  | 0 (0%)  | 16<br>(100%)     | 0 (0%)  | 0 (0%)  | 0 (0%)  | 0 (0%)  | 0 (0%)  |

| Event                      | Adjuvant + AGS-V (N = 17) |         |            |           |         |         | AGS-V (N = 16) |         |           |         |         |         | Placebo (N = 16) |         |           |           |         |         |
|----------------------------|---------------------------|---------|------------|-----------|---------|---------|----------------|---------|-----------|---------|---------|---------|------------------|---------|-----------|-----------|---------|---------|
|                            | No Sx                     | Grade 0 | Grade 1    | Grade 2   | Grade 3 | Grade 4 | No Sx          | Grade 0 | Grade 1   | Grade 2 | Grade 3 | Grade 4 | No Sx            | Grade 0 | Grade 1   | Grade 2   | Grade 3 | Grade 4 |
| Knee pain                  | 17 (100%)                 | 0 (0%)  | 0 (0%)     | 0 (0%)    | 0 (0%)  | 0 (0%)  | 16 (100%)      | 0 (0%)  | 0 (0%)    | 0 (0%)  | 0 (0%)  | 0 (0%)  | 16 (100%)        | 0 (0%)  | 0 (0%)    | 0 (0%)    | 0 (0%)  | 0 (0%)  |
| Laryngitis                 | 17 (100%)                 | 0 (0%)  | 0 (0%)     | 0 (0%)    | 0 (0%)  | 0 (0%)  | 16 (100%)      | 0 (0%)  | 0 (0%)    | 0 (0%)  | 0 (0%)  | 0 (0%)  | 16 (100%)        | 0 (0%)  | 0 (0%)    | 0 (0%)    | 0 (0%)  | 0 (0%)  |
| Local swelling             | 17 (100%)                 | 0 (0%)  | 0 (0%)     | 0 (0%)    | 0 (0%)  | 0 (0%)  | 16 (100%)      | 0 (0%)  | 0 (0%)    | 0 (0%)  | 0 (0%)  | 0 (0%)  | 16 (100%)        | 0 (0%)  | 0 (0%)    | 0 (0%)    | 0 (0%)  | 0 (0%)  |
| Lymph node tenderness      | 17 (100%)                 | 0 (0%)  | 0 (0%)     | 0 (0%)    | 0 (0%)  | 0 (0%)  | 16 (100%)      | 0 (0%)  | 0 (0%)    | 0 (0%)  | 0 (0%)  | 0 (0%)  | 16 (100%)        | 0 (0%)  | 0 (0%)    | 0 (0%)    | 0 (0%)  | 0 (0%)  |
| Lymphocyte count increased | 17 (100%)                 | 0 (0%)  | 0 (0%)     | 0 (0%)    | 0 (0%)  | 0 (0%)  | 16 (100%)      | 0 (0%)  | 0 (0%)    | 0 (0%)  | 0 (0%)  | 0 (0%)  | 16 (100%)        | 0 (0%)  | 0 (0%)    | 0 (0%)    | 0 (0%)  | 0 (0%)  |
| Muscle ache                | 16 (94.12%)               | 0 (0%)  | 1 (5.88%)  | 0 (0%)    | 0 (0%)  | 0 (0%)  | 16 (100%)      | 0 (0%)  | 0 (0%)    | 0 (0%)  | 0 (0%)  | 0 (0%)  | 16 (100%)        | 0 (0%)  | 0 (0%)    | 0 (0%)    | 0 (0%)  | 0 (0%)  |
| Muscle strain              | 17 (100%)                 | 0 (0%)  | 0 (0%)     | 0 (0%)    | 0 (0%)  | 0 (0%)  | 16 (100%)      | 0 (0%)  | 0 (0%)    | 0 (0%)  | 0 (0%)  | 0 (0%)  | 16 (100%)        | 0 (0%)  | 0 (0%)    | 0 (0%)    | 0 (0%)  | 0 (0%)  |
| Myalgia                    | 12 (70.59%)               | 0 (0%)  | 4 (23.53%) | 1 (5.88%) | 0 (0%)  | 0 (0%)  | 14 (87.5%)     | 0 (0%)  | 2 (12.5%) | 0 (0%)  | 0 (0%)  | 0 (0%)  | 14 (87.5%)       | 0 (0%)  | 1 (6.25%) | 1 (6.25%) | 0 (0%)  | 0 (0%)  |
| Nasal congestion           | 17 (100%)                 | 0 (0%)  | 0 (0%)     | 0 (0%)    | 0 (0%)  | 0 (0%)  | 16 (100%)      | 0 (0%)  | 0 (0%)    | 0 (0%)  | 0 (0%)  | 0 (0%)  | 16 (100%)        | 0 (0%)  | 0 (0%)    | 0 (0%)    | 0 (0%)  | 0 (0%)  |
| Nausea                     | 17 (100%)                 | 0 (0%)  | 0 (0%)     | 0 (0%)    | 0 (0%)  | 0 (0%)  | 16 (100%)      | 0 (0%)  | 0 (0%)    | 0 (0%)  | 0 (0%)  | 0 (0%)  | 16 (100%)        | 0 (0%)  | 0 (0%)    | 0 (0%)    | 0 (0%)  | 0 (0%)  |
| Neutrophil count decreased | 17 (100%)                 | 0 (0%)  | 0 (0%)     | 0 (0%)    | 0 (0%)  | 0 (0%)  | 16 (100%)      | 0 (0%)  | 0 (0%)    | 0 (0%)  | 0 (0%)  | 0 (0%)  | 16 (100%)        | 0 (0%)  | 0 (0%)    | 0 (0%)    | 0 (0%)  | 0 (0%)  |
| Oral pain                  | 17 (100%)                 | 0 (0%)  | 0 (0%)     | 0 (0%)    | 0 (0%)  | 0 (0%)  | 16 (100%)      | 0 (0%)  | 0 (0%)    | 0 (0%)  | 0 (0%)  | 0 (0%)  | 16 (100%)        | 0 (0%)  | 0 (0%)    | 0 (0%)    | 0 (0%)  | 0 (0%)  |
| Peripheral neuropathy      | 17 (100%)                 | 0 (0%)  | 0 (0%)     | 0 (0%)    | 0 (0%)  | 0 (0%)  | 16 (100%)      | 0 (0%)  | 0 (0%)    | 0 (0%)  | 0 (0%)  | 0 (0%)  | 16 (100%)        | 0 (0%)  | 0 (0%)    | 0 (0%)    | 0 (0%)  | 0 (0%)  |
| Productive cough           | 17 (100%)                 | 0 (0%)  | 0 (0%)     | 0 (0%)    | 0 (0%)  | 0 (0%)  | 16 (100%)      | 0 (0%)  | 0 (0%)    | 0 (0%)  | 0 (0%)  | 0 (0%)  | 16 (100%)        | 0 (0%)  | 0 (0%)    | 0 (0%)    | 0 (0%)  | 0 (0%)  |
| Pruritic rash              | 17 (100%)                 | 0 (0%)  | 0 (0%)     | 0 (0%)    | 0 (0%)  | 0 (0%)  | 16 (100%)      | 0 (0%)  | 0 (0%)    | 0 (0%)  | 0 (0%)  | 0 (0%)  | 16 (100%)        | 0 (0%)  | 0 (0%)    | 0 (0%)    | 0 (0%)  | 0 (0%)  |
| Pruritus                   | 17 (100%)                 | 0 (0%)  | 0 (0%)     | 0 (0%)    | 0 (0%)  | 0 (0%)  | 16 (100%)      | 0 (0%)  | 0 (0%)    | 0 (0%)  | 0 (0%)  | 0 (0%)  | 16 (100%)        | 0 (0%)  | 0 (0%)    | 0 (0%)    | 0 (0%)  | 0 (0%)  |
| Rash                       | 17 (100%)                 | 0 (0%)  | 0 (0%)     | 0 (0%)    | 0 (0%)  | 0 (0%)  | 16 (100%)      | 0 (0%)  | 0 (0%)    | 0 (0%)  | 0 (0%)  | 0 (0%)  | 16 (100%)        | 0 (0%)  | 0 (0%)    | 0 (0%)    | 0 (0%)  | 0 (0%)  |
| Rhinorrhea                 | 17 (100%)                 | 0 (0%)  | 0 (0%)     | 0 (0%)    | 0 (0%)  | 0 (0%)  | 16 (100%)      | 0 (0%)  | 0 (0%)    | 0 (0%)  | 0 (0%)  | 0 (0%)  | 16 (100%)        | 0 (0%)  | 0 (0%)    | 0 (0%)    | 0 (0%)  | 0 (0%)  |
| Sinusitis                  | 17 (100%)                 | 0 (0%)  | 0 (0%)     | 0 (0%)    | 0 (0%)  | 0 (0%)  | 16 (100%)      | 0 (0%)  | 0 (0%)    | 0 (0%)  | 0 (0%)  | 0 (0%)  | 16 (100%)        | 0 (0%)  | 0 (0%)    | 0 (0%)    | 0 (0%)  | 0 (0%)  |
| Skin hyperpigmentation     | 16 (94.12%)               | 0 (0%)  | 1 (5.88%)  | 0 (0%)    | 0 (0%)  | 0 (0%)  | 16 (100%)      | 0 (0%)  | 0 (0%)    | 0 (0%)  | 0 (0%)  | 0 (0%)  | 16 (100%)        | 0 (0%)  | 0 (0%)    | 0 (0%)    | 0 (0%)  | 0 (0%)  |
| Skin induration            | 17 (100%)                 | 0 (0%)  | 0 (0%)     | 0 (0%)    | 0 (0%)  | 0 (0%)  | 16 (100%)      | 0 (0%)  | 0 (0%)    | 0 (0%)  | 0 (0%)  | 0 (0%)  | 16 (100%)        | 0 (0%)  | 0 (0%)    | 0 (0%)    | 0 (0%)  | 0 (0%)  |

|                                   | <b>Adjuvant + AGS-V (N = 17)</b> |                |                |                |                |                | <b>AGS-V (N = 16)</b> |                |                |                |                |                | <b>Placebo (N = 16)</b> |                |                |                |                |                |
|-----------------------------------|----------------------------------|----------------|----------------|----------------|----------------|----------------|-----------------------|----------------|----------------|----------------|----------------|----------------|-------------------------|----------------|----------------|----------------|----------------|----------------|
| <b>Event</b>                      | <b>No Sx</b>                     | <b>Grade 0</b> | <b>Grade 1</b> | <b>Grade 2</b> | <b>Grade 3</b> | <b>Grade 4</b> | <b>No Sx</b>          | <b>Grade 0</b> | <b>Grade 1</b> | <b>Grade 2</b> | <b>Grade 3</b> | <b>Grade 4</b> | <b>No Sx</b>            | <b>Grade 0</b> | <b>Grade 1</b> | <b>Grade 2</b> | <b>Grade 3</b> | <b>Grade 4</b> |
| Sore throat                       | 17<br>(100%)                     | 0 (0%)         | 0 (0%)         | 0 (0%)         | 0 (0%)         | 0 (0%)         | 16<br>(100%)          | 0 (0%)         | 0 (0%)         | 0 (0%)         | 0 (0%)         | 0 (0%)         | 16<br>(100%)            | 0 (0%)         | 0 (0%)         | 0 (0%)         | 0 (0%)         | 0 (0%)         |
| Systolic hypertension             | 17<br>(100%)                     | 0 (0%)         | 0 (0%)         | 0 (0%)         | 0 (0%)         | 0 (0%)         | 16<br>(100%)          | 0 (0%)         | 0 (0%)         | 0 (0%)         | 0 (0%)         | 0 (0%)         | 16<br>(100%)            | 0 (0%)         | 0 (0%)         | 0 (0%)         | 0 (0%)         | 0 (0%)         |
| Tenderness                        | 16<br>(94.12%)                   | 0 (0%)         | 1<br>(5.88%)   | 0 (0%)         | 0 (0%)         | 0 (0%)         | 16<br>(100%)          | 0 (0%)         | 0 (0%)         | 0 (0%)         | 0 (0%)         | 0 (0%)         | 16<br>(100%)            | 0 (0%)         | 0 (0%)         | 0 (0%)         | 0 (0%)         | 0 (0%)         |
| Tooth extraction                  | 17<br>(100%)                     | 0 (0%)         | 0 (0%)         | 0 (0%)         | 0 (0%)         | 0 (0%)         | 16<br>(100%)          | 0 (0%)         | 0 (0%)         | 0 (0%)         | 0 (0%)         | 0 (0%)         | 16<br>(100%)            | 0 (0%)         | 0 (0%)         | 0 (0%)         | 0 (0%)         | 0 (0%)         |
| Torn bicep tendon                 | 17<br>(100%)                     | 0 (0%)         | 0 (0%)         | 0 (0%)         | 0 (0%)         | 0 (0%)         | 16<br>(100%)          | 0 (0%)         | 0 (0%)         | 0 (0%)         | 0 (0%)         | 0 (0%)         | 16<br>(100%)            | 0 (0%)         | 0 (0%)         | 0 (0%)         | 0 (0%)         | 0 (0%)         |
| Upper respiratory tract infection | 17<br>(100%)                     | 0 (0%)         | 0 (0%)         | 0 (0%)         | 0 (0%)         | 0 (0%)         | 16<br>(100%)          | 0 (0%)         | 0 (0%)         | 0 (0%)         | 0 (0%)         | 0 (0%)         | 16<br>(100%)            | 0 (0%)         | 0 (0%)         | 0 (0%)         | 0 (0%)         | 0 (0%)         |
| Urinary frequency                 | 17<br>(100%)                     | 0 (0%)         | 0 (0%)         | 0 (0%)         | 0 (0%)         | 0 (0%)         | 16<br>(100%)          | 0 (0%)         | 0 (0%)         | 0 (0%)         | 0 (0%)         | 0 (0%)         | 16<br>(100%)            | 0 (0%)         | 0 (0%)         | 0 (0%)         | 0 (0%)         | 0 (0%)         |
| Urinary tract infection           | 17<br>(100%)                     | 0 (0%)         | 0 (0%)         | 0 (0%)         | 0 (0%)         | 0 (0%)         | 16<br>(100%)          | 0 (0%)         | 0 (0%)         | 0 (0%)         | 0 (0%)         | 0 (0%)         | 16<br>(100%)            | 0 (0%)         | 0 (0%)         | 0 (0%)         | 0 (0%)         | 0 (0%)         |
| Urine WBC increased               | 17<br>(100%)                     | 0 (0%)         | 0 (0%)         | 0 (0%)         | 0 (0%)         | 0 (0%)         | 16<br>(100%)          | 0 (0%)         | 0 (0%)         | 0 (0%)         | 0 (0%)         | 0 (0%)         | 16<br>(100%)            | 0 (0%)         | 0 (0%)         | 0 (0%)         | 0 (0%)         | 0 (0%)         |
| Urticaria                         | 17<br>(100%)                     | 0 (0%)         | 0 (0%)         | 0 (0%)         | 0 (0%)         | 0 (0%)         | 16<br>(100%)          | 0 (0%)         | 0 (0%)         | 0 (0%)         | 0 (0%)         | 0 (0%)         | 16<br>(100%)            | 0 (0%)         | 0 (0%)         | 0 (0%)         | 0 (0%)         | 0 (0%)         |
| Vertigo                           | 17<br>(100%)                     | 0 (0%)         | 0 (0%)         | 0 (0%)         | 0 (0%)         | 0 (0%)         | 16<br>(100%)          | 0 (0%)         | 0 (0%)         | 0 (0%)         | 0 (0%)         | 0 (0%)         | 16<br>(100%)            | 0 (0%)         | 0 (0%)         | 0 (0%)         | 0 (0%)         | 0 (0%)         |
| Vitamin D deficiency              | 17<br>(100%)                     | 0 (0%)         | 0 (0%)         | 0 (0%)         | 0 (0%)         | 0 (0%)         | 16<br>(100%)          | 0 (0%)         | 0 (0%)         | 0 (0%)         | 0 (0%)         | 0 (0%)         | 16<br>(100%)            | 0 (0%)         | 0 (0%)         | 0 (0%)         | 0 (0%)         | 0 (0%)         |
| Vomiting                          | 17<br>(100%)                     | 0 (0%)         | 0 (0%)         | 0 (0%)         | 0 (0%)         | 0 (0%)         | 16<br>(100%)          | 0 (0%)         | 0 (0%)         | 0 (0%)         | 0 (0%)         | 0 (0%)         | 16<br>(100%)            | 0 (0%)         | 0 (0%)         | 0 (0%)         | 0 (0%)         | 0 (0%)         |
| WBC decreased                     | 17<br>(100%)                     | 0 (0%)         | 0 (0%)         | 0 (0%)         | 0 (0%)         | 0 (0%)         | 16<br>(100%)          | 0 (0%)         | 0 (0%)         | 0 (0%)         | 0 (0%)         | 0 (0%)         | 16<br>(100%)            | 0 (0%)         | 0 (0%)         | 0 (0%)         | 0 (0%)         | 0 (0%)         |
| WBC increased                     | 17<br>(100%)                     | 0 (0%)         | 0 (0%)         | 0 (0%)         | 0 (0%)         | 0 (0%)         | 16<br>(100%)          | 0 (0%)         | 0 (0%)         | 0 (0%)         | 0 (0%)         | 0 (0%)         | 16<br>(100%)            | 0 (0%)         | 0 (0%)         | 0 (0%)         | 0 (0%)         | 0 (0%)         |

**Table 12 : Occurrence of Max Grade Events Per Subject which are Definitely Related to Treatment by Treatment Group**

|                  | <b>Adjuvant + AGS-V (N = 17)</b> |                |                |                |                |                | <b>AGS-V (N = 16)</b> |                |                |                |                |                | <b>Placebo (N = 16)</b> |                |                |                |                |                |
|------------------|----------------------------------|----------------|----------------|----------------|----------------|----------------|-----------------------|----------------|----------------|----------------|----------------|----------------|-------------------------|----------------|----------------|----------------|----------------|----------------|
| <b>Event</b>     | <b>No Sx</b>                     | <b>Grade 0</b> | <b>Grade 1</b> | <b>Grade 2</b> | <b>Grade 3</b> | <b>Grade 4</b> | <b>No Sx</b>          | <b>Grade 0</b> | <b>Grade 1</b> | <b>Grade 2</b> | <b>Grade 3</b> | <b>Grade 4</b> | <b>No Sx</b>            | <b>Grade 0</b> | <b>Grade 1</b> | <b>Grade 2</b> | <b>Grade 3</b> | <b>Grade 4</b> |
| Abdominal cramps | 17<br>(100%)                     | 0 (0%)         | 0 (0%)         | 0 (0%)         | 0 (0%)         | 0 (0%)         | 16<br>(100%)          | 0 (0%)         | 0 (0%)         | 0 (0%)         | 0 (0%)         | 0 (0%)         | 16<br>(100%)            | 0 (0%)         | 0 (0%)         | 0 (0%)         | 0 (0%)         | 0 (0%)         |
| Abdominal pain   | 17<br>(100%)                     | 0 (0%)         | 0 (0%)         | 0 (0%)         | 0 (0%)         | 0 (0%)         | 16<br>(100%)          | 0 (0%)         | 0 (0%)         | 0 (0%)         | 0 (0%)         | 0 (0%)         | 16<br>(100%)            | 0 (0%)         | 0 (0%)         | 0 (0%)         | 0 (0%)         | 0 (0%)         |

| Event                                | Adjuvant + AGS-V (N = 17) |         |         |         |         |         | AGS-V (N = 16) |         |         |         |         |         | Placebo (N = 16) |         |         |         |         |         |
|--------------------------------------|---------------------------|---------|---------|---------|---------|---------|----------------|---------|---------|---------|---------|---------|------------------|---------|---------|---------|---------|---------|
|                                      | No Sx                     | Grade 0 | Grade 1 | Grade 2 | Grade 3 | Grade 4 | No Sx          | Grade 0 | Grade 1 | Grade 2 | Grade 3 | Grade 4 | No Sx            | Grade 0 | Grade 1 | Grade 2 | Grade 3 | Grade 4 |
| Absolute neutrophil count, decreased | 17 (100%)                 | 0 (0%)  | 0 (0%)  | 0 (0%)  | 0 (0%)  | 0 (0%)  | 16 (100%)      | 0 (0%)  | 0 (0%)  | 0 (0%)  | 0 (0%)  | 0 (0%)  | 16 (100%)        | 0 (0%)  | 0 (0%)  | 0 (0%)  | 0 (0%)  | 0 (0%)  |
| Acute sinusitis                      | 17 (100%)                 | 0 (0%)  | 0 (0%)  | 0 (0%)  | 0 (0%)  | 0 (0%)  | 16 (100%)      | 0 (0%)  | 0 (0%)  | 0 (0%)  | 0 (0%)  | 0 (0%)  | 16 (100%)        | 0 (0%)  | 0 (0%)  | 0 (0%)  | 0 (0%)  | 0 (0%)  |
| ALT increased                        | 17 (100%)                 | 0 (0%)  | 0 (0%)  | 0 (0%)  | 0 (0%)  | 0 (0%)  | 16 (100%)      | 0 (0%)  | 0 (0%)  | 0 (0%)  | 0 (0%)  | 0 (0%)  | 16 (100%)        | 0 (0%)  | 0 (0%)  | 0 (0%)  | 0 (0%)  | 0 (0%)  |
| Anxiety                              | 17 (100%)                 | 0 (0%)  | 0 (0%)  | 0 (0%)  | 0 (0%)  | 0 (0%)  | 16 (100%)      | 0 (0%)  | 0 (0%)  | 0 (0%)  | 0 (0%)  | 0 (0%)  | 16 (100%)        | 0 (0%)  | 0 (0%)  | 0 (0%)  | 0 (0%)  | 0 (0%)  |
| Arthralgia                           | 17 (100%)                 | 0 (0%)  | 0 (0%)  | 0 (0%)  | 0 (0%)  | 0 (0%)  | 16 (100%)      | 0 (0%)  | 0 (0%)  | 0 (0%)  | 0 (0%)  | 0 (0%)  | 16 (100%)        | 0 (0%)  | 0 (0%)  | 0 (0%)  | 0 (0%)  | 0 (0%)  |
| AST increased                        | 17 (100%)                 | 0 (0%)  | 0 (0%)  | 0 (0%)  | 0 (0%)  | 0 (0%)  | 16 (100%)      | 0 (0%)  | 0 (0%)  | 0 (0%)  | 0 (0%)  | 0 (0%)  | 16 (100%)        | 0 (0%)  | 0 (0%)  | 0 (0%)  | 0 (0%)  | 0 (0%)  |
| Bilirubin total high                 | 17 (100%)                 | 0 (0%)  | 0 (0%)  | 0 (0%)  | 0 (0%)  | 0 (0%)  | 16 (100%)      | 0 (0%)  | 0 (0%)  | 0 (0%)  | 0 (0%)  | 0 (0%)  | 16 (100%)        | 0 (0%)  | 0 (0%)  | 0 (0%)  | 0 (0%)  | 0 (0%)  |
| Blood eosinophils increased          | 17 (100%)                 | 0 (0%)  | 0 (0%)  | 0 (0%)  | 0 (0%)  | 0 (0%)  | 16 (100%)      | 0 (0%)  | 0 (0%)  | 0 (0%)  | 0 (0%)  | 0 (0%)  | 16 (100%)        | 0 (0%)  | 0 (0%)  | 0 (0%)  | 0 (0%)  | 0 (0%)  |
| Bradycardia                          | 17 (100%)                 | 0 (0%)  | 0 (0%)  | 0 (0%)  | 0 (0%)  | 0 (0%)  | 16 (100%)      | 0 (0%)  | 0 (0%)  | 0 (0%)  | 0 (0%)  | 0 (0%)  | 16 (100%)        | 0 (0%)  | 0 (0%)  | 0 (0%)  | 0 (0%)  | 0 (0%)  |
| BUN increased                        | 17 (100%)                 | 0 (0%)  | 0 (0%)  | 0 (0%)  | 0 (0%)  | 0 (0%)  | 16 (100%)      | 0 (0%)  | 0 (0%)  | 0 (0%)  | 0 (0%)  | 0 (0%)  | 16 (100%)        | 0 (0%)  | 0 (0%)  | 0 (0%)  | 0 (0%)  | 0 (0%)  |
| Campylobacter                        | 17 (100%)                 | 0 (0%)  | 0 (0%)  | 0 (0%)  | 0 (0%)  | 0 (0%)  | 16 (100%)      | 0 (0%)  | 0 (0%)  | 0 (0%)  | 0 (0%)  | 0 (0%)  | 16 (100%)        | 0 (0%)  | 0 (0%)  | 0 (0%)  | 0 (0%)  | 0 (0%)  |
| Candida vaginitis                    | 17 (100%)                 | 0 (0%)  | 0 (0%)  | 0 (0%)  | 0 (0%)  | 0 (0%)  | 16 (100%)      | 0 (0%)  | 0 (0%)  | 0 (0%)  | 0 (0%)  | 0 (0%)  | 16 (100%)        | 0 (0%)  | 0 (0%)  | 0 (0%)  | 0 (0%)  | 0 (0%)  |
| Chills                               | 17 (100%)                 | 0 (0%)  | 0 (0%)  | 0 (0%)  | 0 (0%)  | 0 (0%)  | 16 (100%)      | 0 (0%)  | 0 (0%)  | 0 (0%)  | 0 (0%)  | 0 (0%)  | 16 (100%)        | 0 (0%)  | 0 (0%)  | 0 (0%)  | 0 (0%)  | 0 (0%)  |
| Common cold                          | 17 (100%)                 | 0 (0%)  | 0 (0%)  | 0 (0%)  | 0 (0%)  | 0 (0%)  | 16 (100%)      | 0 (0%)  | 0 (0%)  | 0 (0%)  | 0 (0%)  | 0 (0%)  | 16 (100%)        | 0 (0%)  | 0 (0%)  | 0 (0%)  | 0 (0%)  | 0 (0%)  |
| Constipation                         | 17 (100%)                 | 0 (0%)  | 0 (0%)  | 0 (0%)  | 0 (0%)  | 0 (0%)  | 16 (100%)      | 0 (0%)  | 0 (0%)  | 0 (0%)  | 0 (0%)  | 0 (0%)  | 16 (100%)        | 0 (0%)  | 0 (0%)  | 0 (0%)  | 0 (0%)  | 0 (0%)  |
| Coryza                               | 17 (100%)                 | 0 (0%)  | 0 (0%)  | 0 (0%)  | 0 (0%)  | 0 (0%)  | 16 (100%)      | 0 (0%)  | 0 (0%)  | 0 (0%)  | 0 (0%)  | 0 (0%)  | 16 (100%)        | 0 (0%)  | 0 (0%)  | 0 (0%)  | 0 (0%)  | 0 (0%)  |
| CPK increased                        | 17 (100%)                 | 0 (0%)  | 0 (0%)  | 0 (0%)  | 0 (0%)  | 0 (0%)  | 16 (100%)      | 0 (0%)  | 0 (0%)  | 0 (0%)  | 0 (0%)  | 0 (0%)  | 16 (100%)        | 0 (0%)  | 0 (0%)  | 0 (0%)  | 0 (0%)  | 0 (0%)  |
| Creatine kinase                      | 17 (100%)                 | 0 (0%)  | 0 (0%)  | 0 (0%)  | 0 (0%)  | 0 (0%)  | 16 (100%)      | 0 (0%)  | 0 (0%)  | 0 (0%)  | 0 (0%)  | 0 (0%)  | 16 (100%)        | 0 (0%)  | 0 (0%)  | 0 (0%)  | 0 (0%)  | 0 (0%)  |
| Creatine kinase high                 | 17 (100%)                 | 0 (0%)  | 0 (0%)  | 0 (0%)  | 0 (0%)  | 0 (0%)  | 16 (100%)      | 0 (0%)  | 0 (0%)  | 0 (0%)  | 0 (0%)  | 0 (0%)  | 16 (100%)        | 0 (0%)  | 0 (0%)  | 0 (0%)  | 0 (0%)  | 0 (0%)  |
| Creatinine increased                 | 17 (100%)                 | 0 (0%)  | 0 (0%)  | 0 (0%)  | 0 (0%)  | 0 (0%)  | 16 (100%)      | 0 (0%)  | 0 (0%)  | 0 (0%)  | 0 (0%)  | 0 (0%)  | 16 (100%)        | 0 (0%)  | 0 (0%)  | 0 (0%)  | 0 (0%)  | 0 (0%)  |

| Event                     | Adjuvant + AGS-V (N = 17) |         |           |         |         |         | AGS-V (N = 16) |         |         |         |         |         | Placebo (N = 16) |         |         |         |         |         |
|---------------------------|---------------------------|---------|-----------|---------|---------|---------|----------------|---------|---------|---------|---------|---------|------------------|---------|---------|---------|---------|---------|
|                           | No Sx                     | Grade 0 | Grade 1   | Grade 2 | Grade 3 | Grade 4 | No Sx          | Grade 0 | Grade 1 | Grade 2 | Grade 3 | Grade 4 | No Sx            | Grade 0 | Grade 1 | Grade 2 | Grade 3 | Grade 4 |
| Dermatitis                | 17 (100%)                 | 0 (0%)  | 0 (0%)    | 0 (0%)  | 0 (0%)  | 0 (0%)  | 16 (100%)      | 0 (0%)  | 0 (0%)  | 0 (0%)  | 0 (0%)  | 0 (0%)  | 16 (100%)        | 0 (0%)  | 0 (0%)  | 0 (0%)  | 0 (0%)  | 0 (0%)  |
| Diaphoresis               | 17 (100%)                 | 0 (0%)  | 0 (0%)    | 0 (0%)  | 0 (0%)  | 0 (0%)  | 16 (100%)      | 0 (0%)  | 0 (0%)  | 0 (0%)  | 0 (0%)  | 0 (0%)  | 16 (100%)        | 0 (0%)  | 0 (0%)  | 0 (0%)  | 0 (0%)  | 0 (0%)  |
| Diarrhea                  | 17 (100%)                 | 0 (0%)  | 0 (0%)    | 0 (0%)  | 0 (0%)  | 0 (0%)  | 16 (100%)      | 0 (0%)  | 0 (0%)  | 0 (0%)  | 0 (0%)  | 0 (0%)  | 16 (100%)        | 0 (0%)  | 0 (0%)  | 0 (0%)  | 0 (0%)  | 0 (0%)  |
| Difficulty sleeping       | 17 (100%)                 | 0 (0%)  | 0 (0%)    | 0 (0%)  | 0 (0%)  | 0 (0%)  | 16 (100%)      | 0 (0%)  | 0 (0%)  | 0 (0%)  | 0 (0%)  | 0 (0%)  | 16 (100%)        | 0 (0%)  | 0 (0%)  | 0 (0%)  | 0 (0%)  | 0 (0%)  |
| Dry cough                 | 17 (100%)                 | 0 (0%)  | 0 (0%)    | 0 (0%)  | 0 (0%)  | 0 (0%)  | 16 (100%)      | 0 (0%)  | 0 (0%)  | 0 (0%)  | 0 (0%)  | 0 (0%)  | 16 (100%)        | 0 (0%)  | 0 (0%)  | 0 (0%)  | 0 (0%)  | 0 (0%)  |
| Eczema                    | 17 (100%)                 | 0 (0%)  | 0 (0%)    | 0 (0%)  | 0 (0%)  | 0 (0%)  | 16 (100%)      | 0 (0%)  | 0 (0%)  | 0 (0%)  | 0 (0%)  | 0 (0%)  | 16 (100%)        | 0 (0%)  | 0 (0%)  | 0 (0%)  | 0 (0%)  | 0 (0%)  |
| Elevated liver enzymes    | 17 (100%)                 | 0 (0%)  | 0 (0%)    | 0 (0%)  | 0 (0%)  | 0 (0%)  | 16 (100%)      | 0 (0%)  | 0 (0%)  | 0 (0%)  | 0 (0%)  | 0 (0%)  | 16 (100%)        | 0 (0%)  | 0 (0%)  | 0 (0%)  | 0 (0%)  | 0 (0%)  |
| Elevated serum creatinine | 17 (100%)                 | 0 (0%)  | 0 (0%)    | 0 (0%)  | 0 (0%)  | 0 (0%)  | 16 (100%)      | 0 (0%)  | 0 (0%)  | 0 (0%)  | 0 (0%)  | 0 (0%)  | 16 (100%)        | 0 (0%)  | 0 (0%)  | 0 (0%)  | 0 (0%)  | 0 (0%)  |
| Eosinophilia              | 17 (100%)                 | 0 (0%)  | 0 (0%)    | 0 (0%)  | 0 (0%)  | 0 (0%)  | 16 (100%)      | 0 (0%)  | 0 (0%)  | 0 (0%)  | 0 (0%)  | 0 (0%)  | 16 (100%)        | 0 (0%)  | 0 (0%)  | 0 (0%)  | 0 (0%)  | 0 (0%)  |
| Erythema                  | 16 (94.12%)               | 0 (0%)  | 1 (5.88%) | 0 (0%)  | 0 (0%)  | 0 (0%)  | 16 (100%)      | 0 (0%)  | 0 (0%)  | 0 (0%)  | 0 (0%)  | 0 (0%)  | 16 (100%)        | 0 (0%)  | 0 (0%)  | 0 (0%)  | 0 (0%)  | 0 (0%)  |
| Eyelid Stye               | 17 (100%)                 | 0 (0%)  | 0 (0%)    | 0 (0%)  | 0 (0%)  | 0 (0%)  | 16 (100%)      | 0 (0%)  | 0 (0%)  | 0 (0%)  | 0 (0%)  | 0 (0%)  | 16 (100%)        | 0 (0%)  | 0 (0%)  | 0 (0%)  | 0 (0%)  | 0 (0%)  |
| Fatigue                   | 17 (100%)                 | 0 (0%)  | 0 (0%)    | 0 (0%)  | 0 (0%)  | 0 (0%)  | 16 (100%)      | 0 (0%)  | 0 (0%)  | 0 (0%)  | 0 (0%)  | 0 (0%)  | 16 (100%)        | 0 (0%)  | 0 (0%)  | 0 (0%)  | 0 (0%)  | 0 (0%)  |
| Fever                     | 17 (100%)                 | 0 (0%)  | 0 (0%)    | 0 (0%)  | 0 (0%)  | 0 (0%)  | 16 (100%)      | 0 (0%)  | 0 (0%)  | 0 (0%)  | 0 (0%)  | 0 (0%)  | 16 (100%)        | 0 (0%)  | 0 (0%)  | 0 (0%)  | 0 (0%)  | 0 (0%)  |
| Feverish                  | 17 (100%)                 | 0 (0%)  | 0 (0%)    | 0 (0%)  | 0 (0%)  | 0 (0%)  | 16 (100%)      | 0 (0%)  | 0 (0%)  | 0 (0%)  | 0 (0%)  | 0 (0%)  | 16 (100%)        | 0 (0%)  | 0 (0%)  | 0 (0%)  | 0 (0%)  | 0 (0%)  |
| Gastritis                 | 17 (100%)                 | 0 (0%)  | 0 (0%)    | 0 (0%)  | 0 (0%)  | 0 (0%)  | 16 (100%)      | 0 (0%)  | 0 (0%)  | 0 (0%)  | 0 (0%)  | 0 (0%)  | 16 (100%)        | 0 (0%)  | 0 (0%)  | 0 (0%)  | 0 (0%)  | 0 (0%)  |
| Headache                  | 17 (100%)                 | 0 (0%)  | 0 (0%)    | 0 (0%)  | 0 (0%)  | 0 (0%)  | 16 (100%)      | 0 (0%)  | 0 (0%)  | 0 (0%)  | 0 (0%)  | 0 (0%)  | 16 (100%)        | 0 (0%)  | 0 (0%)  | 0 (0%)  | 0 (0%)  | 0 (0%)  |
| Hematuria                 | 17 (100%)                 | 0 (0%)  | 0 (0%)    | 0 (0%)  | 0 (0%)  | 0 (0%)  | 16 (100%)      | 0 (0%)  | 0 (0%)  | 0 (0%)  | 0 (0%)  | 0 (0%)  | 16 (100%)        | 0 (0%)  | 0 (0%)  | 0 (0%)  | 0 (0%)  | 0 (0%)  |
| Hemoglobin decreased      | 17 (100%)                 | 0 (0%)  | 0 (0%)    | 0 (0%)  | 0 (0%)  | 0 (0%)  | 16 (100%)      | 0 (0%)  | 0 (0%)  | 0 (0%)  | 0 (0%)  | 0 (0%)  | 16 (100%)        | 0 (0%)  | 0 (0%)  | 0 (0%)  | 0 (0%)  | 0 (0%)  |
| Hyperglycemia             | 17 (100%)                 | 0 (0%)  | 0 (0%)    | 0 (0%)  | 0 (0%)  | 0 (0%)  | 16 (100%)      | 0 (0%)  | 0 (0%)  | 0 (0%)  | 0 (0%)  | 0 (0%)  | 16 (100%)        | 0 (0%)  | 0 (0%)  | 0 (0%)  | 0 (0%)  | 0 (0%)  |
| Hypernatremia             | 17 (100%)                 | 0 (0%)  | 0 (0%)    | 0 (0%)  | 0 (0%)  | 0 (0%)  | 16 (100%)      | 0 (0%)  | 0 (0%)  | 0 (0%)  | 0 (0%)  | 0 (0%)  | 16 (100%)        | 0 (0%)  | 0 (0%)  | 0 (0%)  | 0 (0%)  | 0 (0%)  |
| Hypertension              | 17 (100%)                 | 0 (0%)  | 0 (0%)    | 0 (0%)  | 0 (0%)  | 0 (0%)  | 16 (100%)      | 0 (0%)  | 0 (0%)  | 0 (0%)  | 0 (0%)  | 0 (0%)  | 16 (100%)        | 0 (0%)  | 0 (0%)  | 0 (0%)  | 0 (0%)  | 0 (0%)  |

|                            | Adjuvant + AGS-V (N = 17) |           |            |            |           |         | AGS-V (N = 16) |           |           |         |         |         | Placebo (N = 16) |           |            |           |         |         |
|----------------------------|---------------------------|-----------|------------|------------|-----------|---------|----------------|-----------|-----------|---------|---------|---------|------------------|-----------|------------|-----------|---------|---------|
| Event                      | No Sx                     | Grade 0   | Grade 1    | Grade 2    | Grade 3   | Grade 4 | No Sx          | Grade 0   | Grade 1   | Grade 2 | Grade 3 | Grade 4 | No Sx            | Grade 0   | Grade 1    | Grade 2   | Grade 3 | Grade 4 |
| Hypocalcemia               | 17 (100%)                 | 0 (0%)    | 0 (0%)     | 0 (0%)     | 0 (0%)    | 0 (0%)  | 16 (100%)      | 0 (0%)    | 0 (0%)    | 0 (0%)  | 0 (0%)  | 0 (0%)  | 16 (100%)        | 0 (0%)    | 0 (0%)     | 0 (0%)    | 0 (0%)  | 0 (0%)  |
| Hypoglycemia               | 17 (100%)                 | 0 (0%)    | 0 (0%)     | 0 (0%)     | 0 (0%)    | 0 (0%)  | 16 (100%)      | 0 (0%)    | 0 (0%)    | 0 (0%)  | 0 (0%)  | 0 (0%)  | 16 (100%)        | 0 (0%)    | 0 (0%)     | 0 (0%)    | 0 (0%)  | 0 (0%)  |
| Hypokalemia                | 17 (100%)                 | 0 (0%)    | 0 (0%)     | 0 (0%)     | 0 (0%)    | 0 (0%)  | 16 (100%)      | 0 (0%)    | 0 (0%)    | 0 (0%)  | 0 (0%)  | 0 (0%)  | 16 (100%)        | 0 (0%)    | 0 (0%)     | 0 (0%)    | 0 (0%)  | 0 (0%)  |
| Hyponatremia               | 17 (100%)                 | 0 (0%)    | 0 (0%)     | 0 (0%)     | 0 (0%)    | 0 (0%)  | 16 (100%)      | 0 (0%)    | 0 (0%)    | 0 (0%)  | 0 (0%)  | 0 (0%)  | 16 (100%)        | 0 (0%)    | 0 (0%)     | 0 (0%)    | 0 (0%)  | 0 (0%)  |
| Hypophosphatemia           | 17 (100%)                 | 0 (0%)    | 0 (0%)     | 0 (0%)     | 0 (0%)    | 0 (0%)  | 16 (100%)      | 0 (0%)    | 0 (0%)    | 0 (0%)  | 0 (0%)  | 0 (0%)  | 16 (100%)        | 0 (0%)    | 0 (0%)     | 0 (0%)    | 0 (0%)  | 0 (0%)  |
| Influenza                  | 17 (100%)                 | 0 (0%)    | 0 (0%)     | 0 (0%)     | 0 (0%)    | 0 (0%)  | 16 (100%)      | 0 (0%)    | 0 (0%)    | 0 (0%)  | 0 (0%)  | 0 (0%)  | 16 (100%)        | 0 (0%)    | 0 (0%)     | 0 (0%)    | 0 (0%)  | 0 (0%)  |
| Injection site erythema    | 9 (52.94%)                | 1 (5.88%) | 3 (17.65%) | 3 (17.65%) | 1 (5.88%) | 0 (0%)  | 13 (81.25%)    | 2 (12.5%) | 1 (6.25%) | 0 (0%)  | 0 (0%)  | 0 (0%)  | 14 (87.5%)       | 1 (6.25%) | 1 (6.25%)  | 0 (0%)    | 0 (0%)  | 0 (0%)  |
| Injection site induration  | 15 (88.24%)               | 1 (5.88%) | 1 (5.88%)  | 0 (0%)     | 0 (0%)    | 0 (0%)  | 16 (100%)      | 0 (0%)    | 0 (0%)    | 0 (0%)  | 0 (0%)  | 0 (0%)  | 16 (100%)        | 0 (0%)    | 0 (0%)     | 0 (0%)    | 0 (0%)  | 0 (0%)  |
| Injection site itching     | 11 (64.71%)               | 0 (0%)    | 5 (29.41%) | 0 (0%)     | 1 (5.88%) | 0 (0%)  | 15 (93.75%)    | 0 (0%)    | 1 (6.25%) | 0 (0%)  | 0 (0%)  | 0 (0%)  | 16 (100%)        | 0 (0%)    | 0 (0%)     | 0 (0%)    | 0 (0%)  | 0 (0%)  |
| Injection site pain        | 8 (47.06%)                | 0 (0%)    | 7 (41.18%) | 2 (11.76%) | 0 (0%)    | 0 (0%)  | 10 (62.5%)     | 0 (0%)    | 6 (37.5%) | 0 (0%)  | 0 (0%)  | 0 (0%)  | 12 (75%)         | 0 (0%)    | 3 (18.75%) | 1 (6.25%) | 0 (0%)  | 0 (0%)  |
| Injection site pruritus    | 17 (100%)                 | 0 (0%)    | 0 (0%)     | 0 (0%)     | 0 (0%)    | 0 (0%)  | 14 (87.5%)     | 0 (0%)    | 2 (12.5%) | 0 (0%)  | 0 (0%)  | 0 (0%)  | 16 (100%)        | 0 (0%)    | 0 (0%)     | 0 (0%)    | 0 (0%)  | 0 (0%)  |
| Injection site swelling    | 8 (47.06%)                | 1 (5.88%) | 7 (41.18%) | 1 (5.88%)  | 0 (0%)    | 0 (0%)  | 14 (87.5%)     | 2 (12.5%) | 0 (0%)    | 0 (0%)  | 0 (0%)  | 0 (0%)  | 15 (93.75%)      | 1 (6.25%) | 0 (0%)     | 0 (0%)    | 0 (0%)  | 0 (0%)  |
| Injury                     | 17 (100%)                 | 0 (0%)    | 0 (0%)     | 0 (0%)     | 0 (0%)    | 0 (0%)  | 16 (100%)      | 0 (0%)    | 0 (0%)    | 0 (0%)  | 0 (0%)  | 0 (0%)  | 16 (100%)        | 0 (0%)    | 0 (0%)     | 0 (0%)    | 0 (0%)  | 0 (0%)  |
| Insect bite                | 17 (100%)                 | 0 (0%)    | 0 (0%)     | 0 (0%)     | 0 (0%)    | 0 (0%)  | 16 (100%)      | 0 (0%)    | 0 (0%)    | 0 (0%)  | 0 (0%)  | 0 (0%)  | 16 (100%)        | 0 (0%)    | 0 (0%)     | 0 (0%)    | 0 (0%)  | 0 (0%)  |
| Iron deficiency anemia     | 17 (100%)                 | 0 (0%)    | 0 (0%)     | 0 (0%)     | 0 (0%)    | 0 (0%)  | 16 (100%)      | 0 (0%)    | 0 (0%)    | 0 (0%)  | 0 (0%)  | 0 (0%)  | 16 (100%)        | 0 (0%)    | 0 (0%)     | 0 (0%)    | 0 (0%)  | 0 (0%)  |
| Knee pain                  | 17 (100%)                 | 0 (0%)    | 0 (0%)     | 0 (0%)     | 0 (0%)    | 0 (0%)  | 16 (100%)      | 0 (0%)    | 0 (0%)    | 0 (0%)  | 0 (0%)  | 0 (0%)  | 16 (100%)        | 0 (0%)    | 0 (0%)     | 0 (0%)    | 0 (0%)  | 0 (0%)  |
| Laryngitis                 | 17 (100%)                 | 0 (0%)    | 0 (0%)     | 0 (0%)     | 0 (0%)    | 0 (0%)  | 16 (100%)      | 0 (0%)    | 0 (0%)    | 0 (0%)  | 0 (0%)  | 0 (0%)  | 16 (100%)        | 0 (0%)    | 0 (0%)     | 0 (0%)    | 0 (0%)  | 0 (0%)  |
| Local swelling             | 17 (100%)                 | 0 (0%)    | 0 (0%)     | 0 (0%)     | 0 (0%)    | 0 (0%)  | 16 (100%)      | 0 (0%)    | 0 (0%)    | 0 (0%)  | 0 (0%)  | 0 (0%)  | 16 (100%)        | 0 (0%)    | 0 (0%)     | 0 (0%)    | 0 (0%)  | 0 (0%)  |
| Lymph node tenderness      | 17 (100%)                 | 0 (0%)    | 0 (0%)     | 0 (0%)     | 0 (0%)    | 0 (0%)  | 16 (100%)      | 0 (0%)    | 0 (0%)    | 0 (0%)  | 0 (0%)  | 0 (0%)  | 16 (100%)        | 0 (0%)    | 0 (0%)     | 0 (0%)    | 0 (0%)  | 0 (0%)  |
| Lymphocyte count increased | 17 (100%)                 | 0 (0%)    | 0 (0%)     | 0 (0%)     | 0 (0%)    | 0 (0%)  | 16 (100%)      | 0 (0%)    | 0 (0%)    | 0 (0%)  | 0 (0%)  | 0 (0%)  | 16 (100%)        | 0 (0%)    | 0 (0%)     | 0 (0%)    | 0 (0%)  | 0 (0%)  |
| Muscle ache                | 16 (94.12%)               | 0 (0%)    | 1 (5.88%)  | 0 (0%)     | 0 (0%)    | 0 (0%)  | 16 (100%)      | 0 (0%)    | 0 (0%)    | 0 (0%)  | 0 (0%)  | 0 (0%)  | 16 (100%)        | 0 (0%)    | 0 (0%)     | 0 (0%)    | 0 (0%)  | 0 (0%)  |



|                                   | Adjuvant + AGS-V (N = 17) |         |           |         |         |         | AGS-V (N = 16) |         |         |         |         |         | Placebo (N = 16) |         |         |         |         |         |
|-----------------------------------|---------------------------|---------|-----------|---------|---------|---------|----------------|---------|---------|---------|---------|---------|------------------|---------|---------|---------|---------|---------|
| Event                             | No Sx                     | Grade 0 | Grade 1   | Grade 2 | Grade 3 | Grade 4 | No Sx          | Grade 0 | Grade 1 | Grade 2 | Grade 3 | Grade 4 | No Sx            | Grade 0 | Grade 1 | Grade 2 | Grade 3 | Grade 4 |
| Muscle strain                     | 17 (100%)                 | 0 (0%)  | 0 (0%)    | 0 (0%)  | 0 (0%)  | 0 (0%)  | 16 (100%)      | 0 (0%)  | 0 (0%)  | 0 (0%)  | 0 (0%)  | 0 (0%)  | 16 (100%)        | 0 (0%)  | 0 (0%)  | 0 (0%)  | 0 (0%)  | 0 (0%)  |
| Myalgia                           | 17 (100%)                 | 0 (0%)  | 0 (0%)    | 0 (0%)  | 0 (0%)  | 0 (0%)  | 16 (100%)      | 0 (0%)  | 0 (0%)  | 0 (0%)  | 0 (0%)  | 0 (0%)  | 16 (100%)        | 0 (0%)  | 0 (0%)  | 0 (0%)  | 0 (0%)  | 0 (0%)  |
| Nasal congestion                  | 17 (100%)                 | 0 (0%)  | 0 (0%)    | 0 (0%)  | 0 (0%)  | 0 (0%)  | 16 (100%)      | 0 (0%)  | 0 (0%)  | 0 (0%)  | 0 (0%)  | 0 (0%)  | 16 (100%)        | 0 (0%)  | 0 (0%)  | 0 (0%)  | 0 (0%)  | 0 (0%)  |
| Nausea                            | 17 (100%)                 | 0 (0%)  | 0 (0%)    | 0 (0%)  | 0 (0%)  | 0 (0%)  | 16 (100%)      | 0 (0%)  | 0 (0%)  | 0 (0%)  | 0 (0%)  | 0 (0%)  | 16 (100%)        | 0 (0%)  | 0 (0%)  | 0 (0%)  | 0 (0%)  | 0 (0%)  |
| Neutrophil count decreased        | 17 (100%)                 | 0 (0%)  | 0 (0%)    | 0 (0%)  | 0 (0%)  | 0 (0%)  | 16 (100%)      | 0 (0%)  | 0 (0%)  | 0 (0%)  | 0 (0%)  | 0 (0%)  | 16 (100%)        | 0 (0%)  | 0 (0%)  | 0 (0%)  | 0 (0%)  | 0 (0%)  |
| Oral pain                         | 17 (100%)                 | 0 (0%)  | 0 (0%)    | 0 (0%)  | 0 (0%)  | 0 (0%)  | 16 (100%)      | 0 (0%)  | 0 (0%)  | 0 (0%)  | 0 (0%)  | 0 (0%)  | 16 (100%)        | 0 (0%)  | 0 (0%)  | 0 (0%)  | 0 (0%)  | 0 (0%)  |
| Peripheral neuropathy             | 17 (100%)                 | 0 (0%)  | 0 (0%)    | 0 (0%)  | 0 (0%)  | 0 (0%)  | 16 (100%)      | 0 (0%)  | 0 (0%)  | 0 (0%)  | 0 (0%)  | 0 (0%)  | 16 (100%)        | 0 (0%)  | 0 (0%)  | 0 (0%)  | 0 (0%)  | 0 (0%)  |
| Productive cough                  | 17 (100%)                 | 0 (0%)  | 0 (0%)    | 0 (0%)  | 0 (0%)  | 0 (0%)  | 16 (100%)      | 0 (0%)  | 0 (0%)  | 0 (0%)  | 0 (0%)  | 0 (0%)  | 16 (100%)        | 0 (0%)  | 0 (0%)  | 0 (0%)  | 0 (0%)  | 0 (0%)  |
| Pruritic rash                     | 17 (100%)                 | 0 (0%)  | 0 (0%)    | 0 (0%)  | 0 (0%)  | 0 (0%)  | 16 (100%)      | 0 (0%)  | 0 (0%)  | 0 (0%)  | 0 (0%)  | 0 (0%)  | 16 (100%)        | 0 (0%)  | 0 (0%)  | 0 (0%)  | 0 (0%)  | 0 (0%)  |
| Pruritus                          | 16 (94.12%)               | 0 (0%)  | 1 (5.88%) | 0 (0%)  | 0 (0%)  | 0 (0%)  | 16 (100%)      | 0 (0%)  | 0 (0%)  | 0 (0%)  | 0 (0%)  | 0 (0%)  | 16 (100%)        | 0 (0%)  | 0 (0%)  | 0 (0%)  | 0 (0%)  | 0 (0%)  |
| Rash                              | 17 (100%)                 | 0 (0%)  | 0 (0%)    | 0 (0%)  | 0 (0%)  | 0 (0%)  | 16 (100%)      | 0 (0%)  | 0 (0%)  | 0 (0%)  | 0 (0%)  | 0 (0%)  | 16 (100%)        | 0 (0%)  | 0 (0%)  | 0 (0%)  | 0 (0%)  | 0 (0%)  |
| Rhinorrhea                        | 17 (100%)                 | 0 (0%)  | 0 (0%)    | 0 (0%)  | 0 (0%)  | 0 (0%)  | 16 (100%)      | 0 (0%)  | 0 (0%)  | 0 (0%)  | 0 (0%)  | 0 (0%)  | 16 (100%)        | 0 (0%)  | 0 (0%)  | 0 (0%)  | 0 (0%)  | 0 (0%)  |
| Sinusitis                         | 17 (100%)                 | 0 (0%)  | 0 (0%)    | 0 (0%)  | 0 (0%)  | 0 (0%)  | 16 (100%)      | 0 (0%)  | 0 (0%)  | 0 (0%)  | 0 (0%)  | 0 (0%)  | 16 (100%)        | 0 (0%)  | 0 (0%)  | 0 (0%)  | 0 (0%)  | 0 (0%)  |
| Skin hyperpigmentation            | 16 (94.12%)               | 0 (0%)  | 1 (5.88%) | 0 (0%)  | 0 (0%)  | 0 (0%)  | 16 (100%)      | 0 (0%)  | 0 (0%)  | 0 (0%)  | 0 (0%)  | 0 (0%)  | 16 (100%)        | 0 (0%)  | 0 (0%)  | 0 (0%)  | 0 (0%)  | 0 (0%)  |
| Skin induration                   | 16 (94.12%)               | 0 (0%)  | 1 (5.88%) | 0 (0%)  | 0 (0%)  | 0 (0%)  | 16 (100%)      | 0 (0%)  | 0 (0%)  | 0 (0%)  | 0 (0%)  | 0 (0%)  | 16 (100%)        | 0 (0%)  | 0 (0%)  | 0 (0%)  | 0 (0%)  | 0 (0%)  |
| Sore throat                       | 17 (100%)                 | 0 (0%)  | 0 (0%)    | 0 (0%)  | 0 (0%)  | 0 (0%)  | 16 (100%)      | 0 (0%)  | 0 (0%)  | 0 (0%)  | 0 (0%)  | 0 (0%)  | 16 (100%)        | 0 (0%)  | 0 (0%)  | 0 (0%)  | 0 (0%)  | 0 (0%)  |
| Systolic hypertension             | 17 (100%)                 | 0 (0%)  | 0 (0%)    | 0 (0%)  | 0 (0%)  | 0 (0%)  | 16 (100%)      | 0 (0%)  | 0 (0%)  | 0 (0%)  | 0 (0%)  | 0 (0%)  | 16 (100%)        | 0 (0%)  | 0 (0%)  | 0 (0%)  | 0 (0%)  | 0 (0%)  |
| Tenderness                        | 17 (100%)                 | 0 (0%)  | 0 (0%)    | 0 (0%)  | 0 (0%)  | 0 (0%)  | 16 (100%)      | 0 (0%)  | 0 (0%)  | 0 (0%)  | 0 (0%)  | 0 (0%)  | 16 (100%)        | 0 (0%)  | 0 (0%)  | 0 (0%)  | 0 (0%)  | 0 (0%)  |
| Tooth extraction                  | 17 (100%)                 | 0 (0%)  | 0 (0%)    | 0 (0%)  | 0 (0%)  | 0 (0%)  | 16 (100%)      | 0 (0%)  | 0 (0%)  | 0 (0%)  | 0 (0%)  | 0 (0%)  | 16 (100%)        | 0 (0%)  | 0 (0%)  | 0 (0%)  | 0 (0%)  | 0 (0%)  |
| Torn bicep tendon                 | 17 (100%)                 | 0 (0%)  | 0 (0%)    | 0 (0%)  | 0 (0%)  | 0 (0%)  | 16 (100%)      | 0 (0%)  | 0 (0%)  | 0 (0%)  | 0 (0%)  | 0 (0%)  | 16 (100%)        | 0 (0%)  | 0 (0%)  | 0 (0%)  | 0 (0%)  | 0 (0%)  |
| Upper respiratory tract infection | 17 (100%)                 | 0 (0%)  | 0 (0%)    | 0 (0%)  | 0 (0%)  | 0 (0%)  | 16 (100%)      | 0 (0%)  | 0 (0%)  | 0 (0%)  | 0 (0%)  | 0 (0%)  | 16 (100%)        | 0 (0%)  | 0 (0%)  | 0 (0%)  | 0 (0%)  | 0 (0%)  |

| Event                   | Adjuvant + AGS-V (N = 17) |         |         |         |         |         | AGS-V (N = 16) |         |         |         |         |         | Placebo (N = 16) |         |         |         |         |         |
|-------------------------|---------------------------|---------|---------|---------|---------|---------|----------------|---------|---------|---------|---------|---------|------------------|---------|---------|---------|---------|---------|
|                         | No Sx                     | Grade 0 | Grade 1 | Grade 2 | Grade 3 | Grade 4 | No Sx          | Grade 0 | Grade 1 | Grade 2 | Grade 3 | Grade 4 | No Sx            | Grade 0 | Grade 1 | Grade 2 | Grade 3 | Grade 4 |
| Urinary frequency       | 17 (100%)                 | 0 (0%)  | 0 (0%)  | 0 (0%)  | 0 (0%)  | 0 (0%)  | 16 (100%)      | 0 (0%)  | 0 (0%)  | 0 (0%)  | 0 (0%)  | 0 (0%)  | 16 (100%)        | 0 (0%)  | 0 (0%)  | 0 (0%)  | 0 (0%)  | 0 (0%)  |
| Urinary tract infection | 17 (100%)                 | 0 (0%)  | 0 (0%)  | 0 (0%)  | 0 (0%)  | 0 (0%)  | 16 (100%)      | 0 (0%)  | 0 (0%)  | 0 (0%)  | 0 (0%)  | 0 (0%)  | 16 (100%)        | 0 (0%)  | 0 (0%)  | 0 (0%)  | 0 (0%)  | 0 (0%)  |
| Urine WBC increased     | 17 (100%)                 | 0 (0%)  | 0 (0%)  | 0 (0%)  | 0 (0%)  | 0 (0%)  | 16 (100%)      | 0 (0%)  | 0 (0%)  | 0 (0%)  | 0 (0%)  | 0 (0%)  | 16 (100%)        | 0 (0%)  | 0 (0%)  | 0 (0%)  | 0 (0%)  | 0 (0%)  |
| Urticaria               | 17 (100%)                 | 0 (0%)  | 0 (0%)  | 0 (0%)  | 0 (0%)  | 0 (0%)  | 16 (100%)      | 0 (0%)  | 0 (0%)  | 0 (0%)  | 0 (0%)  | 0 (0%)  | 16 (100%)        | 0 (0%)  | 0 (0%)  | 0 (0%)  | 0 (0%)  | 0 (0%)  |
| Vertigo                 | 17 (100%)                 | 0 (0%)  | 0 (0%)  | 0 (0%)  | 0 (0%)  | 0 (0%)  | 16 (100%)      | 0 (0%)  | 0 (0%)  | 0 (0%)  | 0 (0%)  | 0 (0%)  | 16 (100%)        | 0 (0%)  | 0 (0%)  | 0 (0%)  | 0 (0%)  | 0 (0%)  |
| Vitamin D deficiency    | 17 (100%)                 | 0 (0%)  | 0 (0%)  | 0 (0%)  | 0 (0%)  | 0 (0%)  | 16 (100%)      | 0 (0%)  | 0 (0%)  | 0 (0%)  | 0 (0%)  | 0 (0%)  | 16 (100%)        | 0 (0%)  | 0 (0%)  | 0 (0%)  | 0 (0%)  | 0 (0%)  |
| Vomiting                | 17 (100%)                 | 0 (0%)  | 0 (0%)  | 0 (0%)  | 0 (0%)  | 0 (0%)  | 16 (100%)      | 0 (0%)  | 0 (0%)  | 0 (0%)  | 0 (0%)  | 0 (0%)  | 16 (100%)        | 0 (0%)  | 0 (0%)  | 0 (0%)  | 0 (0%)  | 0 (0%)  |
| WBC decreased           | 17 (100%)                 | 0 (0%)  | 0 (0%)  | 0 (0%)  | 0 (0%)  | 0 (0%)  | 16 (100%)      | 0 (0%)  | 0 (0%)  | 0 (0%)  | 0 (0%)  | 0 (0%)  | 16 (100%)        | 0 (0%)  | 0 (0%)  | 0 (0%)  | 0 (0%)  | 0 (0%)  |
| WBC increased           | 17 (100%)                 | 0 (0%)  | 0 (0%)  | 0 (0%)  | 0 (0%)  | 0 (0%)  | 16 (100%)      | 0 (0%)  | 0 (0%)  | 0 (0%)  | 0 (0%)  | 0 (0%)  | 16 (100%)        | 0 (0%)  | 0 (0%)  | 0 (0%)  | 0 (0%)  | 0 (0%)  |

**Table 13 : Occurrence of “Worst” Relatedness to Treatment Per Subject by Treatment**

|                    | Adjuvant + AGS-V (N = 17) | AGS-V (N =16) | Placebo (N = 16) |
|--------------------|---------------------------|---------------|------------------|
| Definitely Related | 16 (94.12%)               | 6 (37.5%)     | 4 (25%)          |
| Probably Related   | 1 (5.88%)                 | 0 (0%)        | 2 (12.5%)        |
| Possibly Related   | 0 (0%)                    | 4 (25%)       | 2 (12.5%)        |
| Unlikely Related   | 0 (0%)                    | 6 (37.5%)     | 7 (43.75%)       |
| Unrelated          | 0 (0%)                    | 0 (0%)        | 0 (0%)           |
| No AEs             | 0 (0%)                    | 0 (0%)        | 1 (6.25%)        |

**Table 14 : Number of Subjects with Event Per Group and One-Sided Fisher’s Exact Test P-Values Comparing Vaccine to Placebo**

| <b>Event</b>                         | <b>Adjuvant + AGS-V<br/>(N = 17)</b> | <b>AGS-V<br/>(N = 16)</b> | <b>Placebo<br/>(N = 16)</b> | <b>Fisher's Exact P-value<br/>Adjuvant + AGS-V vs. Placebo</b> | <b>Fisher's Exact P-value<br/>AGS-V vs. Placebo</b> |
|--------------------------------------|--------------------------------------|---------------------------|-----------------------------|----------------------------------------------------------------|-----------------------------------------------------|
| Abdominal cramps                     | 0                                    | 1                         | 0                           | 1                                                              | 0.5                                                 |
| Abdominal pain                       | 3                                    | 2                         | 1                           | 0.32                                                           | 0.5                                                 |
| Absolute neutrophil count, decreased | 2                                    | 1                         | 1                           | 0.52                                                           | 0.76                                                |
| Acute sinusitis                      | 0                                    | 0                         | 1                           | 1                                                              | 1                                                   |
| ALT increased                        | 0                                    | 3                         | 0                           | 1                                                              | 0.11                                                |
| Anxiety                              | 0                                    | 1                         | 0                           | 1                                                              | 0.5                                                 |
| Arthralgia                           | 3                                    | 1                         | 0                           | 0.12                                                           | 0.5                                                 |
| AST increased                        | 2                                    | 2                         | 1                           | 0.52                                                           | 0.5                                                 |
| Bilirubin total high                 | 0                                    | 1                         | 0                           | 1                                                              | 0.5                                                 |
| Blood eosinophils increased          | 0                                    | 1                         | 0                           | 1                                                              | 0.5                                                 |
| Bradycardia                          | 1                                    | 1                         | 0                           | 0.52                                                           | 0.5                                                 |
| BUN increased                        | 2                                    | 0                         | 1                           | 0.52                                                           | 1                                                   |
| Campylobacter                        | 0                                    | 0                         | 1                           | 1                                                              | 1                                                   |
| Candida vaginitis                    | 0                                    | 0                         | 2                           | 1                                                              | 1                                                   |
| Chills                               | 3                                    | 2                         | 1                           | 0.32                                                           | 0.5                                                 |
| Common cold                          | 1                                    | 0                         | 1                           | 0.77                                                           | 1                                                   |
| Constipation                         | 0                                    | 0                         | 1                           | 1                                                              | 1                                                   |
| Coryza                               | 2                                    | 0                         | 1                           | 0.52                                                           | 1                                                   |
| CPK increased                        | 5                                    | 2                         | 6                           | 0.81                                                           | 0.98                                                |
| Creatine kinase                      | 0                                    | 0                         | 1                           | 1                                                              | 1                                                   |
| Creatine kinase high                 | 1                                    | 1                         | 1                           | 0.77                                                           | 0.76                                                |
| Creatinine increased                 | 1                                    | 0                         | 0                           | 0.52                                                           | 1                                                   |
| Dermatitis                           | 1                                    | 0                         | 0                           | 0.52                                                           | 1                                                   |
| Diaphoresis                          | 2                                    | 2                         | 1                           | 0.52                                                           | 0.5                                                 |
| Diarrhea                             | 2                                    | 0                         | 1                           | 0.52                                                           | 1                                                   |
| Difficulty sleeping                  | 1                                    | 0                         | 0                           | 0.52                                                           | 1                                                   |

| <b>Event</b>              | <b>Adjuvant + AGS-V<br/>(N = 17)</b> | <b>AGS-V<br/>(N = 16)</b> | <b>Placebo<br/>(N = 16)</b> | <b>Fisher's Exact P-value<br/>Adjuvant + AGS-V vs. Placebo</b> | <b>Fisher's Exact P-value<br/>AGS-V vs. Placebo</b> |
|---------------------------|--------------------------------------|---------------------------|-----------------------------|----------------------------------------------------------------|-----------------------------------------------------|
| Dry cough                 | 2                                    | 0                         | 0                           | 0.26                                                           | 1                                                   |
| Eczema                    | 1                                    | 0                         | 0                           | 0.52                                                           | 1                                                   |
| Elevated liver enzymes    | 1                                    | 0                         | 0                           | 0.52                                                           | 1                                                   |
| Elevated serum creatinine | 1                                    | 0                         | 0                           | 0.52                                                           | 1                                                   |
| Eosinophilia              | 0                                    | 1                         | 0                           | 1                                                              | 0.5                                                 |
| Erythema                  | 15                                   | 15                        | 15                          | 0.88                                                           | 0.76                                                |
| Eyelid Stye               | 0                                    | 1                         | 0                           | 1                                                              | 0.5                                                 |
| Fatigue                   | 8                                    | 5                         | 4                           | 0.17                                                           | 0.5                                                 |
| Fever                     | 1                                    | 0                         | 2                           | 0.9                                                            | 1                                                   |
| Feverish                  | 7                                    | 1                         | 3                           | 0.15                                                           | 0.95                                                |
| Gastritis                 | 0                                    | 0                         | 1                           | 1                                                              | 1                                                   |
| Headache                  | 8                                    | 7                         | 4                           | 0.17                                                           | 0.23                                                |
| Hematuria                 | 1                                    | 3                         | 3                           | 0.96                                                           | 0.67                                                |
| Hemoglobin decreased      | 7                                    | 8                         | 5                           | 0.41                                                           | 0.24                                                |
| Hyperglycemia             | 1                                    | 2                         | 2                           | 0.9                                                            | 0.7                                                 |
| Hypernatremia             | 3                                    | 4                         | 3                           | 0.7                                                            | 0.5                                                 |
| Hypertension              | 1                                    | 0                         | 0                           | 0.52                                                           | 1                                                   |
| Hypocalcemia              | 1                                    | 1                         | 0                           | 0.52                                                           | 0.5                                                 |
| Hypoglycemia              | 3                                    | 2                         | 3                           | 0.7                                                            | 0.83                                                |
| Hypokalemia               | 2                                    | 2                         | 3                           | 0.85                                                           | 0.83                                                |
| Hyponatremia              | 1                                    | 0                         | 0                           | 0.52                                                           | 1                                                   |
| Hypophosphatemia          | 1                                    | 4                         | 2                           | 0.9                                                            | 0.33                                                |
| Influenza                 | 1                                    | 0                         | 0                           | 0.52                                                           | 1                                                   |
| Injection site erythema   | 8                                    | 3                         | 2                           | 0.04*                                                          | 0.5                                                 |
| Injection site induration | 2                                    | 0                         | 0                           | 0.26                                                           | 1                                                   |
| Injection site itching    | 7                                    | 1                         | 0                           | 0.005*                                                         | 0.5                                                 |

| <b>Event</b>               | <b>Adjuvant + AGS-V<br/>(N = 17)</b> | <b>AGS-V<br/>(N = 16)</b> | <b>Placebo<br/>(N = 16)</b> | <b>Fisher's Exact P-value<br/>Adjuvant + AGS-V vs. Placebo</b> | <b>Fisher's Exact P-value<br/>AGS-V vs. Placebo</b> |
|----------------------------|--------------------------------------|---------------------------|-----------------------------|----------------------------------------------------------------|-----------------------------------------------------|
| Injection site pain        | 9                                    | 6                         | 4                           | 0.099*                                                         | 0.35                                                |
| Injection site pruritus    | 0                                    | 2                         | 0                           | 1                                                              | 0.24                                                |
| Injection site swelling    | 9                                    | 2                         | 1                           | 0.004*                                                         | 0.5                                                 |
| Injury                     | 0                                    | 1                         | 0                           | 1                                                              | 0.5                                                 |
| Insect bite                | 0                                    | 0                         | 1                           | 1                                                              | 1                                                   |
| Iron deficiency anemia     | 0                                    | 1                         | 0                           | 1                                                              | 0.5                                                 |
| Knee pain                  | 1                                    | 0                         | 0                           | 0.52                                                           | 1                                                   |
| Laryngitis                 | 0                                    | 0                         | 1                           | 1                                                              | 1                                                   |
| Local swelling             | 16                                   | 15                        | 15                          | 0.74                                                           | 0.76                                                |
| Lymph node tenderness      | 1                                    | 0                         | 0                           | 0.52                                                           | 1                                                   |
| Lymphocyte count increased | 1                                    | 0                         | 0                           | 0.52                                                           | 1                                                   |
| Muscle ache                | 2                                    | 0                         | 0                           | 0.26                                                           | 1                                                   |
| Muscle strain              | 1                                    | 0                         | 0                           | 0.52                                                           | 1                                                   |
| Myalgia                    | 5                                    | 3                         | 5                           | 0.69                                                           | 0.89                                                |
| Nasal congestion           | 2                                    | 1                         | 1                           | 0.52                                                           | 0.76                                                |
| Nausea                     | 2                                    | 3                         | 2                           | 0.72                                                           | 0.5                                                 |
| Neutrophil count decreased | 1                                    | 4                         | 3                           | 0.96                                                           | 0.5                                                 |
| Oral pain                  | 1                                    | 0                         | 0                           | 0.52                                                           | 1                                                   |
| Peripheral neuropathy      | 0                                    | 0                         | 1                           | 1                                                              | 1                                                   |
| Productive cough           | 1                                    | 0                         | 0                           | 0.52                                                           | 1                                                   |
| Pruritic rash              | 2                                    | 1                         | 0                           | 0.26                                                           | 0.5                                                 |
| Pruritus                   | 1                                    | 0                         | 0                           | 0.52                                                           | 1                                                   |
| Rash                       | 0                                    | 0                         | 3                           | 1                                                              | 1                                                   |
| Rhinorrhea                 | 1                                    | 0                         | 1                           | 0.77                                                           | 1                                                   |
| Sinusitis                  | 1                                    | 0                         | 0                           | 0.52                                                           | 1                                                   |
| Skin hyperpigmentation     | 1                                    | 1                         | 0                           | 0.52                                                           | 0.5                                                 |

| <b>Event</b>                      | <b>Adjuvant + AGS-V<br/>(N = 17)</b> | <b>AGS-V<br/>(N = 16)</b> | <b>Placebo<br/>(N = 16)</b> | <b>Fisher's Exact P-value<br/>Adjuvant + AGS-V vs. Placebo</b> | <b>Fisher's Exact P-value<br/>AGS-V vs. Placebo</b> |
|-----------------------------------|--------------------------------------|---------------------------|-----------------------------|----------------------------------------------------------------|-----------------------------------------------------|
| Skin induration                   | 1                                    | 0                         | 0                           | 0.52                                                           | 1                                                   |
| Sore throat                       | 2                                    | 1                         | 1                           | 0.52                                                           | 0.76                                                |
| Systolic hypertension             | 0                                    | 1                         | 0                           | 1                                                              | 0.5                                                 |
| Tenderness                        | 1                                    | 0                         | 0                           | 0.52                                                           | 1                                                   |
| Tooth extraction                  | 1                                    | 0                         | 0                           | 0.52                                                           | 1                                                   |
| Torn bicep tendon                 | 1                                    | 0                         | 0                           | 0.52                                                           | 1                                                   |
| Upper respiratory tract infection | 0                                    | 1                         | 0                           | 1                                                              | 0.5                                                 |
| Urinary frequency                 | 0                                    | 0                         | 1                           | 1                                                              | 1                                                   |
| Urinary tract infection           | 0                                    | 1                         | 1                           | 1                                                              | 0.76                                                |
| Urine WBC increased               | 0                                    | 2                         | 0                           | 1                                                              | 0.24                                                |
| Urticaria                         | 1                                    | 0                         | 0                           | 0.52                                                           | 1                                                   |
| Vertigo                           | 0                                    | 0                         | 1                           | 1                                                              | 1                                                   |
| Vitamin D deficiency              | 1                                    | 0                         | 0                           | 0.52                                                           | 1                                                   |
| Vomiting                          | 0                                    | 2                         | 0                           | 1                                                              | 0.24                                                |
| WBC decreased                     | 0                                    | 0                         | 2                           | 1                                                              | 1                                                   |
| WBC increased                     | 1                                    | 2                         | 1                           | 0.77                                                           | 0.5                                                 |

\* Indicates one-sided Fisher's Exact p-value < 0.1

Supplemental Table 3. Adverse Events Summary (combining vaccine and adjuvanted vaccine groups)

**Table 1 : Summary of Max Grade Adverse Events Per Subject**

| Event                                | Vaccine (N = 33) |         |               |              |              |         | Placebo (N = 16) |         |              |         |              |         |
|--------------------------------------|------------------|---------|---------------|--------------|--------------|---------|------------------|---------|--------------|---------|--------------|---------|
|                                      | No Sx            | Grade 0 | Grade 1       | Grade 2      | Grade 3      | Grade 4 | No Sx            | Grade 0 | Grade 1      | Grade 2 | Grade 3      | Grade 4 |
| Abdominal cramps                     | 32<br>(96.97%)   | 0 (0%)  | 1<br>(3.03%)  | 0 (0%)       | 0 (0%)       | 0 (0%)  | 16<br>(100%)     | 0 (0%)  | 0 (0%)       | 0 (0%)  | 0 (0%)       | 0 (0%)  |
| Abdominal pain                       | 28<br>(84.85%)   | 0 (0%)  | 5<br>(15.15%) | 0 (0%)       | 0 (0%)       | 0 (0%)  | 15<br>(93.75%)   | 0 (0%)  | 1<br>(6.25%) | 0 (0%)  | 0 (0%)       | 0 (0%)  |
| Absolute neutrophil count, decreased | 30<br>(90.91%)   | 0 (0%)  | 2<br>(6.06%)  | 0 (0%)       | 1<br>(3.03%) | 0 (0%)  | 15<br>(93.75%)   | 0 (0%)  | 0 (0%)       | 0 (0%)  | 1<br>(6.25%) | 0 (0%)  |
| Acute sinusitis                      | 33<br>(100%)     | 0 (0%)  | 0 (0%)        | 0 (0%)       | 0 (0%)       | 0 (0%)  | 15<br>(93.75%)   | 0 (0%)  | 1<br>(6.25%) | 0 (0%)  | 0 (0%)       | 0 (0%)  |
| ALT increased                        | 30<br>(90.91%)   | 0 (0%)  | 3<br>(9.09%)  | 0 (0%)       | 0 (0%)       | 0 (0%)  | 16<br>(100%)     | 0 (0%)  | 0 (0%)       | 0 (0%)  | 0 (0%)       | 0 (0%)  |
| Anxiety                              | 32<br>(96.97%)   | 0 (0%)  | 1<br>(3.03%)  | 0 (0%)       | 0 (0%)       | 0 (0%)  | 16<br>(100%)     | 0 (0%)  | 0 (0%)       | 0 (0%)  | 0 (0%)       | 0 (0%)  |
| Arthralgia                           | 29<br>(87.88%)   | 0 (0%)  | 2<br>(6.06%)  | 2<br>(6.06%) | 0 (0%)       | 0 (0%)  | 16<br>(100%)     | 0 (0%)  | 0 (0%)       | 0 (0%)  | 0 (0%)       | 0 (0%)  |
| AST increased                        | 29<br>(87.88%)   | 0 (0%)  | 4<br>(12.12%) | 0 (0%)       | 0 (0%)       | 0 (0%)  | 15<br>(93.75%)   | 0 (0%)  | 1<br>(6.25%) | 0 (0%)  | 0 (0%)       | 0 (0%)  |
| Bilirubin total high                 | 32<br>(96.97%)   | 0 (0%)  | 1<br>(3.03%)  | 0 (0%)       | 0 (0%)       | 0 (0%)  | 16<br>(100%)     | 0 (0%)  | 0 (0%)       | 0 (0%)  | 0 (0%)       | 0 (0%)  |
| Blood eosinophils increased          | 32<br>(96.97%)   | 0 (0%)  | 1<br>(3.03%)  | 0 (0%)       | 0 (0%)       | 0 (0%)  | 16<br>(100%)     | 0 (0%)  | 0 (0%)       | 0 (0%)  | 0 (0%)       | 0 (0%)  |
| Bradycardia                          | 31<br>(93.94%)   | 0 (0%)  | 1<br>(3.03%)  | 0 (0%)       | 1<br>(3.03%) | 0 (0%)  | 16<br>(100%)     | 0 (0%)  | 0 (0%)       | 0 (0%)  | 0 (0%)       | 0 (0%)  |
| BUN increased                        | 31<br>(93.94%)   | 0 (0%)  | 1<br>(3.03%)  | 1<br>(3.03%) | 0 (0%)       | 0 (0%)  | 15<br>(93.75%)   | 0 (0%)  | 1<br>(6.25%) | 0 (0%)  | 0 (0%)       | 0 (0%)  |
| Campylobacter                        | 33<br>(100%)     | 0 (0%)  | 0 (0%)        | 0 (0%)       | 0 (0%)       | 0 (0%)  | 15<br>(93.75%)   | 0 (0%)  | 1<br>(6.25%) | 0 (0%)  | 0 (0%)       | 0 (0%)  |
| Candida vaginitis                    | 33<br>(100%)     | 0 (0%)  | 0 (0%)        | 0 (0%)       | 0 (0%)       | 0 (0%)  | 14<br>(87.5%)    | 0 (0%)  | 2<br>(12.5%) | 0 (0%)  | 0 (0%)       | 0 (0%)  |
| Chills                               | 28<br>(84.85%)   | 0 (0%)  | 2<br>(6.06%)  | 3<br>(9.09%) | 0 (0%)       | 0 (0%)  | 15<br>(93.75%)   | 0 (0%)  | 1<br>(6.25%) | 0 (0%)  | 0 (0%)       | 0 (0%)  |

| Event                     | Vaccine (N = 33) |         |                |               |              |              | Placebo (N = 16) |         |                |              |               |         |
|---------------------------|------------------|---------|----------------|---------------|--------------|--------------|------------------|---------|----------------|--------------|---------------|---------|
|                           | No Sx            | Grade 0 | Grade 1        | Grade 2       | Grade 3      | Grade 4      | No Sx            | Grade 0 | Grade 1        | Grade 2      | Grade 3       | Grade 4 |
| Common cold               | 32<br>(96.97%)   | 0 (0%)  | 1<br>(3.03%)   | 0 (0%)        | 0 (0%)       | 0 (0%)       | 15<br>(93.75%)   | 0 (0%)  | 1<br>(6.25%)   | 0 (0%)       | 0 (0%)        | 0 (0%)  |
| Constipation              | 33<br>(100%)     | 0 (0%)  | 0 (0%)         | 0 (0%)        | 0 (0%)       | 0 (0%)       | 15<br>(93.75%)   | 0 (0%)  | 1<br>(6.25%)   | 0 (0%)       | 0 (0%)        | 0 (0%)  |
| Coryza                    | 31<br>(93.94%)   | 0 (0%)  | 1<br>(3.03%)   | 1<br>(3.03%)  | 0 (0%)       | 0 (0%)       | 15<br>(93.75%)   | 0 (0%)  | 1<br>(6.25%)   | 0 (0%)       | 0 (0%)        | 0 (0%)  |
| CPK increased             | 26<br>(78.79%)   | 0 (0%)  | 0 (0%)         | 4<br>(12.12%) | 1<br>(3.03%) | 2<br>(6.06%) | 10<br>(62.5%)    | 0 (0%)  | 1<br>(6.25%)   | 2<br>(12.5%) | 3<br>(18.75%) | 0 (0%)  |
| Creatine kinase           | 33<br>(100%)     | 0 (0%)  | 0 (0%)         | 0 (0%)        | 0 (0%)       | 0 (0%)       | 15<br>(93.75%)   | 0 (0%)  | 0 (0%)         | 1<br>(6.25%) | 0 (0%)        | 0 (0%)  |
| Creatine kinase high      | 31<br>(93.94%)   | 0 (0%)  | 0 (0%)         | 2<br>(6.06%)  | 0 (0%)       | 0 (0%)       | 15<br>(93.75%)   | 0 (0%)  | 0 (0%)         | 0 (0%)       | 1<br>(6.25%)  | 0 (0%)  |
| Creatinine increased      | 32<br>(96.97%)   | 0 (0%)  | 1<br>(3.03%)   | 0 (0%)        | 0 (0%)       | 0 (0%)       | 16<br>(100%)     | 0 (0%)  | 0 (0%)         | 0 (0%)       | 0 (0%)        | 0 (0%)  |
| Dermatitis                | 32<br>(96.97%)   | 0 (0%)  | 0 (0%)         | 0 (0%)        | 1<br>(3.03%) | 0 (0%)       | 16<br>(100%)     | 0 (0%)  | 0 (0%)         | 0 (0%)       | 0 (0%)        | 0 (0%)  |
| Diaphoresis               | 29<br>(87.88%)   | 0 (0%)  | 3<br>(9.09%)   | 1<br>(3.03%)  | 0 (0%)       | 0 (0%)       | 15<br>(93.75%)   | 0 (0%)  | 1<br>(6.25%)   | 0 (0%)       | 0 (0%)        | 0 (0%)  |
| Diarrhea                  | 31<br>(93.94%)   | 0 (0%)  | 1<br>(3.03%)   | 1<br>(3.03%)  | 0 (0%)       | 0 (0%)       | 15<br>(93.75%)   | 0 (0%)  | 1<br>(6.25%)   | 0 (0%)       | 0 (0%)        | 0 (0%)  |
| Difficulty sleeping       | 32<br>(96.97%)   | 0 (0%)  | 1<br>(3.03%)   | 0 (0%)        | 0 (0%)       | 0 (0%)       | 16<br>(100%)     | 0 (0%)  | 0 (0%)         | 0 (0%)       | 0 (0%)        | 0 (0%)  |
| Dry cough                 | 31<br>(93.94%)   | 0 (0%)  | 2<br>(6.06%)   | 0 (0%)        | 0 (0%)       | 0 (0%)       | 16<br>(100%)     | 0 (0%)  | 0 (0%)         | 0 (0%)       | 0 (0%)        | 0 (0%)  |
| Eczema                    | 32<br>(96.97%)   | 0 (0%)  | 1<br>(3.03%)   | 0 (0%)        | 0 (0%)       | 0 (0%)       | 16<br>(100%)     | 0 (0%)  | 0 (0%)         | 0 (0%)       | 0 (0%)        | 0 (0%)  |
| Elevated liver enzymes    | 32<br>(96.97%)   | 0 (0%)  | 1<br>(3.03%)   | 0 (0%)        | 0 (0%)       | 0 (0%)       | 16<br>(100%)     | 0 (0%)  | 0 (0%)         | 0 (0%)       | 0 (0%)        | 0 (0%)  |
| Elevated serum creatinine | 32<br>(96.97%)   | 0 (0%)  | 1<br>(3.03%)   | 0 (0%)        | 0 (0%)       | 0 (0%)       | 16<br>(100%)     | 0 (0%)  | 0 (0%)         | 0 (0%)       | 0 (0%)        | 0 (0%)  |
| Eosinophilia              | 32<br>(96.97%)   | 0 (0%)  | 1<br>(3.03%)   | 0 (0%)        | 0 (0%)       | 0 (0%)       | 16<br>(100%)     | 0 (0%)  | 0 (0%)         | 0 (0%)       | 0 (0%)        | 0 (0%)  |
| Erythema                  | 3<br>(9.09%)     | 0 (0%)  | 29<br>(87.88%) | 1<br>(3.03%)  | 0 (0%)       | 0 (0%)       | 1<br>(6.25%)     | 0 (0%)  | 15<br>(93.75%) | 0 (0%)       | 0 (0%)        | 0 (0%)  |



| Event                | Vaccine (N = 33) |         |               |               |              |         | Placebo (N = 16) |         |               |              |              |         |
|----------------------|------------------|---------|---------------|---------------|--------------|---------|------------------|---------|---------------|--------------|--------------|---------|
|                      | No Sx            | Grade 0 | Grade 1       | Grade 2       | Grade 3      | Grade 4 | No Sx            | Grade 0 | Grade 1       | Grade 2      | Grade 3      | Grade 4 |
| Eyelid Styte         | 32<br>(96.97%)   | 0 (0%)  | 1<br>(3.03%)  | 0 (0%)        | 0 (0%)       | 0 (0%)  | 16<br>(100%)     | 0 (0%)  | 0 (0%)        | 0 (0%)       | 0 (0%)       | 0 (0%)  |
| Fatigue              | 20<br>(60.61%)   | 0 (0%)  | 10<br>(30.3%) | 3<br>(9.09%)  | 0 (0%)       | 0 (0%)  | 12 (75%)         | 0 (0%)  | 3<br>(18.75%) | 1<br>(6.25%) | 0 (0%)       | 0 (0%)  |
| Fever                | 32<br>(96.97%)   | 0 (0%)  | 0 (0%)        | 1<br>(3.03%)  | 0 (0%)       | 0 (0%)  | 14<br>(87.5%)    | 0 (0%)  | 2<br>(12.5%)  | 0 (0%)       | 0 (0%)       | 0 (0%)  |
| Feverish             | 25<br>(75.76%)   | 0 (0%)  | 5<br>(15.15%) | 3<br>(9.09%)  | 0 (0%)       | 0 (0%)  | 13<br>(81.25%)   | 0 (0%)  | 3<br>(18.75%) | 0 (0%)       | 0 (0%)       | 0 (0%)  |
| Gastritis            | 33<br>(100%)     | 0 (0%)  | 0 (0%)        | 0 (0%)        | 0 (0%)       | 0 (0%)  | 15<br>(93.75%)   | 0 (0%)  | 1<br>(6.25%)  | 0 (0%)       | 0 (0%)       | 0 (0%)  |
| Headache             | 18<br>(54.55%)   | 0 (0%)  | 9<br>(27.27%) | 6<br>(18.18%) | 0 (0%)       | 0 (0%)  | 12 (75%)         | 0 (0%)  | 4 (25%)       | 0 (0%)       | 0 (0%)       | 0 (0%)  |
| Hematuria            | 29<br>(87.88%)   | 0 (0%)  | 2<br>(6.06%)  | 0 (0%)        | 2<br>(6.06%) | 0 (0%)  | 13<br>(81.25%)   | 0 (0%)  | 1<br>(6.25%)  | 2<br>(12.5%) | 0 (0%)       | 0 (0%)  |
| Hemoglobin decreased | 18<br>(54.55%)   | 0 (0%)  | 10<br>(30.3%) | 5<br>(15.15%) | 0 (0%)       | 0 (0%)  | 11<br>(68.75%)   | 0 (0%)  | 4 (25%)       | 1<br>(6.25%) | 0 (0%)       | 0 (0%)  |
| Hyperglycemia        | 30<br>(90.91%)   | 0 (0%)  | 0 (0%)        | 3<br>(9.09%)  | 0 (0%)       | 0 (0%)  | 14<br>(87.5%)    | 0 (0%)  | 0 (0%)        | 2<br>(12.5%) | 0 (0%)       | 0 (0%)  |
| Hypernatremia        | 26<br>(78.79%)   | 0 (0%)  | 5<br>(15.15%) | 1<br>(3.03%)  | 1<br>(3.03%) | 0 (0%)  | 13<br>(81.25%)   | 0 (0%)  | 2<br>(12.5%)  | 1<br>(6.25%) | 0 (0%)       | 0 (0%)  |
| Hypertension         | 32<br>(96.97%)   | 0 (0%)  | 1<br>(3.03%)  | 0 (0%)        | 0 (0%)       | 0 (0%)  | 16<br>(100%)     | 0 (0%)  | 0 (0%)        | 0 (0%)       | 0 (0%)       | 0 (0%)  |
| Hypocalcemia         | 31<br>(93.94%)   | 0 (0%)  | 2<br>(6.06%)  | 0 (0%)        | 0 (0%)       | 0 (0%)  | 16<br>(100%)     | 0 (0%)  | 0 (0%)        | 0 (0%)       | 0 (0%)       | 0 (0%)  |
| Hypoglycemia         | 28<br>(84.85%)   | 0 (0%)  | 3<br>(9.09%)  | 0 (0%)        | 2<br>(6.06%) | 0 (0%)  | 13<br>(81.25%)   | 0 (0%)  | 1<br>(6.25%)  | 1<br>(6.25%) | 1<br>(6.25%) | 0 (0%)  |
| Hypokalemia          | 29<br>(87.88%)   | 0 (0%)  | 2<br>(6.06%)  | 2<br>(6.06%)  | 0 (0%)       | 0 (0%)  | 13<br>(81.25%)   | 0 (0%)  | 1<br>(6.25%)  | 1<br>(6.25%) | 1<br>(6.25%) | 0 (0%)  |
| Hyponatremia         | 32<br>(96.97%)   | 0 (0%)  | 1<br>(3.03%)  | 0 (0%)        | 0 (0%)       | 0 (0%)  | 16<br>(100%)     | 0 (0%)  | 0 (0%)        | 0 (0%)       | 0 (0%)       | 0 (0%)  |
| Hypophosphatemia     | 28<br>(84.85%)   | 0 (0%)  | 1<br>(3.03%)  | 4<br>(12.12%) | 0 (0%)       | 0 (0%)  | 14<br>(87.5%)    | 0 (0%)  | 1<br>(6.25%)  | 1<br>(6.25%) | 0 (0%)       | 0 (0%)  |
| Influenza            | 32<br>(96.97%)   | 0 (0%)  | 0 (0%)        | 1<br>(3.03%)  | 0 (0%)       | 0 (0%)  | 16<br>(100%)     | 0 (0%)  | 0 (0%)        | 0 (0%)       | 0 (0%)       | 0 (0%)  |

| Event                      | Vaccine (N = 33) |              |                |              |              |         | Placebo (N = 16) |              |                |              |         |         |
|----------------------------|------------------|--------------|----------------|--------------|--------------|---------|------------------|--------------|----------------|--------------|---------|---------|
|                            | No Sx            | Grade 0      | Grade 1        | Grade 2      | Grade 3      | Grade 4 | No Sx            | Grade 0      | Grade 1        | Grade 2      | Grade 3 | Grade 4 |
| Injection site erythema    | 22<br>(66.67%)   | 3<br>(9.09%) | 4<br>(12.12%)  | 3<br>(9.09%) | 1<br>(3.03%) | 0 (0%)  | 14<br>(87.5%)    | 1<br>(6.25%) | 1<br>(6.25%)   | 0 (0%)       | 0 (0%)  | 0 (0%)  |
| Injection site induration  | 31<br>(93.94%)   | 1<br>(3.03%) | 1<br>(3.03%)   | 0 (0%)       | 0 (0%)       | 0 (0%)  | 16<br>(100%)     | 0 (0%)       | 0 (0%)         | 0 (0%)       | 0 (0%)  | 0 (0%)  |
| Injection site itching     | 25<br>(75.76%)   | 0 (0%)       | 7<br>(21.21%)  | 0 (0%)       | 1<br>(3.03%) | 0 (0%)  | 16<br>(100%)     | 0 (0%)       | 0 (0%)         | 0 (0%)       | 0 (0%)  | 0 (0%)  |
| Injection site pain        | 18<br>(54.55%)   | 0 (0%)       | 13<br>(39.39%) | 2<br>(6.06%) | 0 (0%)       | 0 (0%)  | 12 (75%)         | 0 (0%)       | 3<br>(18.75%)  | 1<br>(6.25%) | 0 (0%)  | 0 (0%)  |
| Injection site pruritus    | 31<br>(93.94%)   | 0 (0%)       | 2<br>(6.06%)   | 0 (0%)       | 0 (0%)       | 0 (0%)  | 16<br>(100%)     | 0 (0%)       | 0 (0%)         | 0 (0%)       | 0 (0%)  | 0 (0%)  |
| Injection site swelling    | 22<br>(66.67%)   | 3<br>(9.09%) | 7<br>(21.21%)  | 1<br>(3.03%) | 0 (0%)       | 0 (0%)  | 15<br>(93.75%)   | 1<br>(6.25%) | 0 (0%)         | 0 (0%)       | 0 (0%)  | 0 (0%)  |
| Injury                     | 32<br>(96.97%)   | 0 (0%)       | 1<br>(3.03%)   | 0 (0%)       | 0 (0%)       | 0 (0%)  | 16<br>(100%)     | 0 (0%)       | 0 (0%)         | 0 (0%)       | 0 (0%)  | 0 (0%)  |
| Insect bite                | 33<br>(100%)     | 0 (0%)       | 0 (0%)         | 0 (0%)       | 0 (0%)       | 0 (0%)  | 15<br>(93.75%)   | 0 (0%)       | 1<br>(6.25%)   | 0 (0%)       | 0 (0%)  | 0 (0%)  |
| Iron deficiency anemia     | 32<br>(96.97%)   | 0 (0%)       | 0 (0%)         | 1<br>(3.03%) | 0 (0%)       | 0 (0%)  | 16<br>(100%)     | 0 (0%)       | 0 (0%)         | 0 (0%)       | 0 (0%)  | 0 (0%)  |
| Knee pain                  | 32<br>(96.97%)   | 0 (0%)       | 1<br>(3.03%)   | 0 (0%)       | 0 (0%)       | 0 (0%)  | 16<br>(100%)     | 0 (0%)       | 0 (0%)         | 0 (0%)       | 0 (0%)  | 0 (0%)  |
| Laryngitis                 | 33<br>(100%)     | 0 (0%)       | 0 (0%)         | 0 (0%)       | 0 (0%)       | 0 (0%)  | 15<br>(93.75%)   | 0 (0%)       | 1<br>(6.25%)   | 0 (0%)       | 0 (0%)  | 0 (0%)  |
| Local swelling             | 2<br>(6.06%)     | 0 (0%)       | 31<br>(93.94%) | 0 (0%)       | 0 (0%)       | 0 (0%)  | 1<br>(6.25%)     | 0 (0%)       | 15<br>(93.75%) | 0 (0%)       | 0 (0%)  | 0 (0%)  |
| Lymph node tenderness      | 32<br>(96.97%)   | 0 (0%)       | 1<br>(3.03%)   | 0 (0%)       | 0 (0%)       | 0 (0%)  | 16<br>(100%)     | 0 (0%)       | 0 (0%)         | 0 (0%)       | 0 (0%)  | 0 (0%)  |
| Lymphocyte count increased | 32<br>(96.97%)   | 0 (0%)       | 1<br>(3.03%)   | 0 (0%)       | 0 (0%)       | 0 (0%)  | 16<br>(100%)     | 0 (0%)       | 0 (0%)         | 0 (0%)       | 0 (0%)  | 0 (0%)  |
| Muscle ache                | 31<br>(93.94%)   | 0 (0%)       | 2<br>(6.06%)   | 0 (0%)       | 0 (0%)       | 0 (0%)  | 16<br>(100%)     | 0 (0%)       | 0 (0%)         | 0 (0%)       | 0 (0%)  | 0 (0%)  |
| Muscle strain              | 32<br>(96.97%)   | 0 (0%)       | 1<br>(3.03%)   | 0 (0%)       | 0 (0%)       | 0 (0%)  | 16<br>(100%)     | 0 (0%)       | 0 (0%)         | 0 (0%)       | 0 (0%)  | 0 (0%)  |
| Myalgia                    | 25<br>(75.76%)   | 0 (0%)       | 6<br>(18.18%)  | 2<br>(6.06%) | 0 (0%)       | 0 (0%)  | 11<br>(68.75%)   | 0 (0%)       | 4 (25%)        | 1<br>(6.25%) | 0 (0%)  | 0 (0%)  |

| Event                      | Vaccine (N = 33) |         |               |              |              |         | Placebo (N = 16) |         |              |              |              |         |
|----------------------------|------------------|---------|---------------|--------------|--------------|---------|------------------|---------|--------------|--------------|--------------|---------|
|                            | No Sx            | Grade 0 | Grade 1       | Grade 2      | Grade 3      | Grade 4 | No Sx            | Grade 0 | Grade 1      | Grade 2      | Grade 3      | Grade 4 |
| Nasal congestion           | 30<br>(90.91%)   | 0 (0%)  | 3<br>(9.09%)  | 0 (0%)       | 0 (0%)       | 0 (0%)  | 15<br>(93.75%)   | 0 (0%)  | 1<br>(6.25%) | 0 (0%)       | 0 (0%)       | 0 (0%)  |
| Nausea                     | 28<br>(84.85%)   | 0 (0%)  | 4<br>(12.12%) | 1<br>(3.03%) | 0 (0%)       | 0 (0%)  | 14<br>(87.5%)    | 0 (0%)  | 2<br>(12.5%) | 0 (0%)       | 0 (0%)       | 0 (0%)  |
| Neutrophil count decreased | 28<br>(84.85%)   | 0 (0%)  | 4<br>(12.12%) | 1<br>(3.03%) | 0 (0%)       | 0 (0%)  | 13<br>(81.25%)   | 0 (0%)  | 2<br>(12.5%) | 1<br>(6.25%) | 0 (0%)       | 0 (0%)  |
| Oral pain                  | 32<br>(96.97%)   | 0 (0%)  | 0 (0%)        | 1<br>(3.03%) | 0 (0%)       | 0 (0%)  | 16<br>(100%)     | 0 (0%)  | 0 (0%)       | 0 (0%)       | 0 (0%)       | 0 (0%)  |
| Peripheral neuropathy      | 33<br>(100%)     | 0 (0%)  | 0 (0%)        | 0 (0%)       | 0 (0%)       | 0 (0%)  | 15<br>(93.75%)   | 0 (0%)  | 1<br>(6.25%) | 0 (0%)       | 0 (0%)       | 0 (0%)  |
| Productive cough           | 32<br>(96.97%)   | 0 (0%)  | 1<br>(3.03%)  | 0 (0%)       | 0 (0%)       | 0 (0%)  | 16<br>(100%)     | 0 (0%)  | 0 (0%)       | 0 (0%)       | 0 (0%)       | 0 (0%)  |
| Pruritic rash              | 30<br>(90.91%)   | 0 (0%)  | 1<br>(3.03%)  | 1<br>(3.03%) | 1<br>(3.03%) | 0 (0%)  | 16<br>(100%)     | 0 (0%)  | 0 (0%)       | 0 (0%)       | 0 (0%)       | 0 (0%)  |
| Pruritus                   | 32<br>(96.97%)   | 0 (0%)  | 1<br>(3.03%)  | 0 (0%)       | 0 (0%)       | 0 (0%)  | 16<br>(100%)     | 0 (0%)  | 0 (0%)       | 0 (0%)       | 0 (0%)       | 0 (0%)  |
| Rash                       | 33<br>(100%)     | 0 (0%)  | 0 (0%)        | 0 (0%)       | 0 (0%)       | 0 (0%)  | 13<br>(81.25%)   | 0 (0%)  | 2<br>(12.5%) | 0 (0%)       | 1<br>(6.25%) | 0 (0%)  |
| Rhinorrhea                 | 32<br>(96.97%)   | 0 (0%)  | 1<br>(3.03%)  | 0 (0%)       | 0 (0%)       | 0 (0%)  | 15<br>(93.75%)   | 0 (0%)  | 1<br>(6.25%) | 0 (0%)       | 0 (0%)       | 0 (0%)  |
| Sinusitis                  | 32<br>(96.97%)   | 0 (0%)  | 0 (0%)        | 1<br>(3.03%) | 0 (0%)       | 0 (0%)  | 16<br>(100%)     | 0 (0%)  | 0 (0%)       | 0 (0%)       | 0 (0%)       | 0 (0%)  |
| Skin hyperpigmentation     | 31<br>(93.94%)   | 0 (0%)  | 2<br>(6.06%)  | 0 (0%)       | 0 (0%)       | 0 (0%)  | 16<br>(100%)     | 0 (0%)  | 0 (0%)       | 0 (0%)       | 0 (0%)       | 0 (0%)  |
| Skin induration            | 32<br>(96.97%)   | 0 (0%)  | 1<br>(3.03%)  | 0 (0%)       | 0 (0%)       | 0 (0%)  | 16<br>(100%)     | 0 (0%)  | 0 (0%)       | 0 (0%)       | 0 (0%)       | 0 (0%)  |
| Sore throat                | 30<br>(90.91%)   | 0 (0%)  | 1<br>(3.03%)  | 2<br>(6.06%) | 0 (0%)       | 0 (0%)  | 15<br>(93.75%)   | 0 (0%)  | 1<br>(6.25%) | 0 (0%)       | 0 (0%)       | 0 (0%)  |
| Systolic hypertension      | 32<br>(96.97%)   | 0 (0%)  | 1<br>(3.03%)  | 0 (0%)       | 0 (0%)       | 0 (0%)  | 16<br>(100%)     | 0 (0%)  | 0 (0%)       | 0 (0%)       | 0 (0%)       | 0 (0%)  |
| Tenderness                 | 32<br>(96.97%)   | 0 (0%)  | 1<br>(3.03%)  | 0 (0%)       | 0 (0%)       | 0 (0%)  | 16<br>(100%)     | 0 (0%)  | 0 (0%)       | 0 (0%)       | 0 (0%)       | 0 (0%)  |
| Tooth extraction           | 32<br>(96.97%)   | 0 (0%)  | 0 (0%)        | 1<br>(3.03%) | 0 (0%)       | 0 (0%)  | 16<br>(100%)     | 0 (0%)  | 0 (0%)       | 0 (0%)       | 0 (0%)       | 0 (0%)  |

| Event                             | Vaccine (N = 33) |         |              |              |              |         | Placebo (N = 16) |         |              |              |              |         |
|-----------------------------------|------------------|---------|--------------|--------------|--------------|---------|------------------|---------|--------------|--------------|--------------|---------|
|                                   | No Sx            | Grade 0 | Grade 1      | Grade 2      | Grade 3      | Grade 4 | No Sx            | Grade 0 | Grade 1      | Grade 2      | Grade 3      | Grade 4 |
| Torn bicep tendon                 | 32<br>(96.97%)   | 0 (0%)  | 0 (0%)       | 0 (0%)       | 1<br>(3.03%) | 0 (0%)  | 16<br>(100%)     | 0 (0%)  | 0 (0%)       | 0 (0%)       | 0 (0%)       | 0 (0%)  |
| Upper respiratory tract infection | 32<br>(96.97%)   | 0 (0%)  | 1<br>(3.03%) | 0 (0%)       | 0 (0%)       | 0 (0%)  | 16<br>(100%)     | 0 (0%)  | 0 (0%)       | 0 (0%)       | 0 (0%)       | 0 (0%)  |
| Urinary frequency                 | 33<br>(100%)     | 0 (0%)  | 0 (0%)       | 0 (0%)       | 0 (0%)       | 0 (0%)  | 15<br>(93.75%)   | 0 (0%)  | 1<br>(6.25%) | 0 (0%)       | 0 (0%)       | 0 (0%)  |
| Urinary tract infection           | 32<br>(96.97%)   | 0 (0%)  | 0 (0%)       | 0 (0%)       | 1<br>(3.03%) | 0 (0%)  | 15<br>(93.75%)   | 0 (0%)  | 0 (0%)       | 0 (0%)       | 1<br>(6.25%) | 0 (0%)  |
| Urine WBC increased               | 31<br>(93.94%)   | 0 (0%)  | 2<br>(6.06%) | 0 (0%)       | 0 (0%)       | 0 (0%)  | 16<br>(100%)     | 0 (0%)  | 0 (0%)       | 0 (0%)       | 0 (0%)       | 0 (0%)  |
| Urticaria                         | 32<br>(96.97%)   | 0 (0%)  | 0 (0%)       | 0 (0%)       | 1<br>(3.03%) | 0 (0%)  | 16<br>(100%)     | 0 (0%)  | 0 (0%)       | 0 (0%)       | 0 (0%)       | 0 (0%)  |
| Vertigo                           | 33<br>(100%)     | 0 (0%)  | 0 (0%)       | 0 (0%)       | 0 (0%)       | 0 (0%)  | 15<br>(93.75%)   | 0 (0%)  | 0 (0%)       | 0 (0%)       | 1<br>(6.25%) | 0 (0%)  |
| Vitamin D deficiency              | 32<br>(96.97%)   | 0 (0%)  | 1<br>(3.03%) | 0 (0%)       | 0 (0%)       | 0 (0%)  | 16<br>(100%)     | 0 (0%)  | 0 (0%)       | 0 (0%)       | 0 (0%)       | 0 (0%)  |
| Vomiting                          | 31<br>(93.94%)   | 0 (0%)  | 1<br>(3.03%) | 1<br>(3.03%) | 0 (0%)       | 0 (0%)  | 16<br>(100%)     | 0 (0%)  | 0 (0%)       | 0 (0%)       | 0 (0%)       | 0 (0%)  |
| WBC decreased                     | 33<br>(100%)     | 0 (0%)  | 0 (0%)       | 0 (0%)       | 0 (0%)       | 0 (0%)  | 14<br>(87.5%)    | 0 (0%)  | 1<br>(6.25%) | 1<br>(6.25%) | 0 (0%)       | 0 (0%)  |
| WBC increased                     | 30<br>(90.91%)   | 0 (0%)  | 3<br>(9.09%) | 0 (0%)       | 0 (0%)       | 0 (0%)  | 15<br>(93.75%)   | 0 (0%)  | 1<br>(6.25%) | 0 (0%)       | 0 (0%)       | 0 (0%)  |

**Table 2 : Counts of Adverse Events by Treatment Group**

|                                                                    | Vaccine (N = 33)    | Placebo (N = 16)   |
|--------------------------------------------------------------------|---------------------|--------------------|
| Number of Subjects with one or more AE (percent)                   | 33 (100%)           | 15 (93.8%)         |
| Mean Number of AEs (SD, SE)                                        | 13.15 (7.86 , 1.37) | 9.81 (6.25 , 1.56) |
| Median Number of AEs (IQR)                                         | 11 (12)             | 10 (9.5)           |
| Min, Max Number of AEs                                             | 2, 33               | 0, 22              |
| Number of Subjects with one or more AE Grade 3 or Higher (percent) | 13 (39%)            | 7 (44%)            |
| Mean Number of AEs Grade 3 or Higher                               | 0.55 (0.79 , 0.14)  | 0.63 (0.89, 0.22)  |

**Table 3 : Occurrence of Grade 0 Events by Treatment Group****Note : In Tables 3-7, multiple occurrences of the same event type with different grades are included in the respective table**

| <b>Event</b>                         | <b>Vaccine (N = 33)</b> | <b>Placebo (N = 16)</b> |
|--------------------------------------|-------------------------|-------------------------|
| Abdominal cramps                     | 0 (0%)                  | 0 (0%)                  |
| Abdominal pain                       | 0 (0%)                  | 0 (0%)                  |
| Absolute neutrophil count, decreased | 0 (0%)                  | 0 (0%)                  |
| Acute sinusitis                      | 0 (0%)                  | 0 (0%)                  |
| ALT increased                        | 0 (0%)                  | 0 (0%)                  |
| Anxiety                              | 0 (0%)                  | 0 (0%)                  |
| Arthralgia                           | 0 (0%)                  | 0 (0%)                  |
| AST increased                        | 0 (0%)                  | 0 (0%)                  |
| Bilirubin total high                 | 0 (0%)                  | 0 (0%)                  |
| Blood eosinophils increased          | 0 (0%)                  | 0 (0%)                  |
| Bradycardia                          | 0 (0%)                  | 0 (0%)                  |
| BUN increased                        | 0 (0%)                  | 0 (0%)                  |
| Campylobacter                        | 0 (0%)                  | 0 (0%)                  |
| Candida vaginitis                    | 0 (0%)                  | 0 (0%)                  |
| Chills                               | 0 (0%)                  | 0 (0%)                  |
| Common cold                          | 0 (0%)                  | 0 (0%)                  |
| Constipation                         | 0 (0%)                  | 0 (0%)                  |
| Coryza                               | 0 (0%)                  | 0 (0%)                  |
| CPK increased                        | 0 (0%)                  | 0 (0%)                  |
| Creatine kinase                      | 0 (0%)                  | 0 (0%)                  |

| <b>Event</b>              | <b>Vaccine (N = 33)</b> | <b>Placebo (N = 16)</b> |
|---------------------------|-------------------------|-------------------------|
| Creatine kinase high      | 0 (0%)                  | 0 (0%)                  |
| Creatinine increased      | 0 (0%)                  | 0 (0%)                  |
| Dermatitis                | 0 (0%)                  | 0 (0%)                  |
| Diaphoresis               | 0 (0%)                  | 0 (0%)                  |
| Diarrhea                  | 0 (0%)                  | 0 (0%)                  |
| Difficulty sleeping       | 0 (0%)                  | 0 (0%)                  |
| Dry cough                 | 0 (0%)                  | 0 (0%)                  |
| Eczema                    | 0 (0%)                  | 0 (0%)                  |
| Elevated liver enzymes    | 0 (0%)                  | 0 (0%)                  |
| Elevated serum creatinine | 0 (0%)                  | 0 (0%)                  |
| Eosinophilia              | 0 (0%)                  | 0 (0%)                  |
| Erythema                  | 0 (0%)                  | 0 (0%)                  |
| Eyelid Stye               | 0 (0%)                  | 0 (0%)                  |
| Fatigue                   | 0 (0%)                  | 0 (0%)                  |
| Fever                     | 0 (0%)                  | 0 (0%)                  |
| Feverish                  | 0 (0%)                  | 0 (0%)                  |
| Gastritis                 | 0 (0%)                  | 0 (0%)                  |
| Headache                  | 0 (0%)                  | 0 (0%)                  |
| Hematuria                 | 0 (0%)                  | 0 (0%)                  |
| Hemoglobin decreased      | 0 (0%)                  | 0 (0%)                  |
| Hyperglycemia             | 0 (0%)                  | 0 (0%)                  |
| Hypernatremia             | 0 (0%)                  | 0 (0%)                  |
| Hypertension              | 0 (0%)                  | 0 (0%)                  |
| Hypocalcemia              | 0 (0%)                  | 0 (0%)                  |
| Hypoglycemia              | 0 (0%)                  | 0 (0%)                  |
| Hypokalemia               | 0 (0%)                  | 0 (0%)                  |

| <b>Event</b>               | <b>Vaccine (N = 33)</b> | <b>Placebo (N = 16)</b> |
|----------------------------|-------------------------|-------------------------|
| Hyponatremia               | 0 (0%)                  | 0 (0%)                  |
| Hypophosphatemia           | 0 (0%)                  | 0 (0%)                  |
| Influenza                  | 0 (0%)                  | 0 (0%)                  |
| Injection site erythema    | 6 (18.18%)              | 1 (6.25%)               |
| Injection site induration  | 1 (3.03%)               | 0 (0%)                  |
| Injection site itching     | 0 (0%)                  | 0 (0%)                  |
| Injection site pain        | 0 (0%)                  | 0 (0%)                  |
| Injection site pruritus    | 0 (0%)                  | 0 (0%)                  |
| Injection site swelling    | 4 (12.12%)              | 1 (6.25%)               |
| Injury                     | 0 (0%)                  | 0 (0%)                  |
| Insect bite                | 0 (0%)                  | 0 (0%)                  |
| Iron deficiency anemia     | 0 (0%)                  | 0 (0%)                  |
| Knee pain                  | 0 (0%)                  | 0 (0%)                  |
| Laryngitis                 | 0 (0%)                  | 0 (0%)                  |
| Local swelling             | 0 (0%)                  | 0 (0%)                  |
| Lymph node tenderness      | 0 (0%)                  | 0 (0%)                  |
| Lymphocyte count increased | 0 (0%)                  | 0 (0%)                  |
| Muscle ache                | 0 (0%)                  | 0 (0%)                  |
| Muscle strain              | 0 (0%)                  | 0 (0%)                  |
| Myalgia                    | 0 (0%)                  | 0 (0%)                  |
| Nasal congestion           | 0 (0%)                  | 0 (0%)                  |
| Nausea                     | 0 (0%)                  | 0 (0%)                  |
| Neutrophil count decreased | 0 (0%)                  | 0 (0%)                  |
| Oral pain                  | 0 (0%)                  | 0 (0%)                  |
| Peripheral neuropathy      | 0 (0%)                  | 0 (0%)                  |
| Productive cough           | 0 (0%)                  | 0 (0%)                  |

| <b>Event</b>                      | <b>Vaccine (N = 33)</b> | <b>Placebo (N = 16)</b> |
|-----------------------------------|-------------------------|-------------------------|
| Pruritic rash                     | 0 (0%)                  | 0 (0%)                  |
| Pruritus                          | 0 (0%)                  | 0 (0%)                  |
| Rash                              | 0 (0%)                  | 0 (0%)                  |
| Rhinorrhea                        | 0 (0%)                  | 0 (0%)                  |
| Sinusitis                         | 0 (0%)                  | 0 (0%)                  |
| Skin hyperpigmentation            | 0 (0%)                  | 0 (0%)                  |
| Skin induration                   | 0 (0%)                  | 0 (0%)                  |
| Sore throat                       | 0 (0%)                  | 0 (0%)                  |
| Systolic hypertension             | 0 (0%)                  | 0 (0%)                  |
| Tenderness                        | 0 (0%)                  | 0 (0%)                  |
| Tooth extraction                  | 0 (0%)                  | 0 (0%)                  |
| Torn bicep tendon                 | 0 (0%)                  | 0 (0%)                  |
| Upper respiratory tract infection | 0 (0%)                  | 0 (0%)                  |
| Urinary frequency                 | 0 (0%)                  | 0 (0%)                  |
| Urinary tract infection           | 0 (0%)                  | 0 (0%)                  |
| Urine WBC increased               | 0 (0%)                  | 0 (0%)                  |
| Urticaria                         | 0 (0%)                  | 0 (0%)                  |
| Vertigo                           | 0 (0%)                  | 0 (0%)                  |
| Vitamin D deficiency              | 0 (0%)                  | 0 (0%)                  |
| Vomiting                          | 0 (0%)                  | 0 (0%)                  |
| WBC decreased                     | 0 (0%)                  | 0 (0%)                  |
| WBC increased                     | 0 (0%)                  | 0 (0%)                  |

**Table 4 : Occurrence of Grade 1 Events by Treatment Group**

| <b>Event</b>     | <b>Vaccine (N = 33)</b> | <b>Placebo (N = 16)</b> |
|------------------|-------------------------|-------------------------|
| Abdominal cramps | 1 (3.03%)               | 0 (0%)                  |
| Abdominal pain   | 5 (15.15%)              | 1 (6.25%)               |



| <b>Event</b>                         | <b>Vaccine (N = 33)</b> | <b>Placebo (N = 16)</b> |
|--------------------------------------|-------------------------|-------------------------|
| Absolute neutrophil count, decreased | 3 (9.09%)               | 1 (6.25%)               |
| Acute sinusitis                      | 0 (0%)                  | 1 (6.25%)               |
| ALT increased                        | 3 (9.09%)               | 0 (0%)                  |
| Anxiety                              | 1 (3.03%)               | 0 (0%)                  |
| Arthralgia                           | 3 (9.09%)               | 0 (0%)                  |
| AST increased                        | 4 (12.12%)              | 1 (6.25%)               |
| Bilirubin total high                 | 1 (3.03%)               | 0 (0%)                  |
| Blood eosinophils increased          | 1 (3.03%)               | 0 (0%)                  |
| Bradycardia                          | 2 (6.06%)               | 0 (0%)                  |
| BUN increased                        | 2 (6.06%)               | 1 (6.25%)               |
| Campylobacter                        | 0 (0%)                  | 1 (6.25%)               |
| Candida vaginitis                    | 0 (0%)                  | 2 (12.5%)               |
| Chills                               | 3 (9.09%)               | 1 (6.25%)               |
| Common cold                          | 1 (3.03%)               | 1 (6.25%)               |
| Constipation                         | 0 (0%)                  | 1 (6.25%)               |
| Coryza                               | 1 (3.03%)               | 1 (6.25%)               |
| CPK increased                        | 2 (6.06%)               | 4 (25%)                 |
| Creatine kinase                      | 0 (0%)                  | 0 (0%)                  |
| Creatine kinase high                 | 1 (3.03%)               | 0 (0%)                  |
| Creatinine increased                 | 1 (3.03%)               | 0 (0%)                  |
| Dermatitis                           | 0 (0%)                  | 0 (0%)                  |
| Diaphoresis                          | 3 (9.09%)               | 1 (6.25%)               |
| Diarrhea                             | 1 (3.03%)               | 1 (6.25%)               |
| Difficulty sleeping                  | 1 (3.03%)               | 0 (0%)                  |
| Dry cough                            | 2 (6.06%)               | 0 (0%)                  |
| Eczema                               | 1 (3.03%)               | 0 (0%)                  |

| <b>Event</b>              | <b>Vaccine (N = 33)</b> | <b>Placebo (N = 16)</b> |
|---------------------------|-------------------------|-------------------------|
| Elevated liver enzymes    | 1 (3.03%)               | 0 (0%)                  |
| Elevated serum creatinine | 1 (3.03%)               | 0 (0%)                  |
| Eosinophilia              | 1 (3.03%)               | 0 (0%)                  |
| Erythema                  | 30 (90.91%)             | 15 (93.75%)             |
| Eyelid Stye               | 1 (3.03%)               | 0 (0%)                  |
| Fatigue                   | 13 (39.39%)             | 4 (25%)                 |
| Fever                     | 0 (0%)                  | 2 (12.5%)               |
| Feverish                  | 6 (18.18%)              | 3 (18.75%)              |
| Gastritis                 | 0 (0%)                  | 1 (6.25%)               |
| Headache                  | 13 (39.39%)             | 4 (25%)                 |
| Hematuria                 | 2 (6.06%)               | 2 (12.5%)               |
| Hemoglobin decreased      | 15 (45.45%)             | 5 (31.25%)              |
| Hyperglycemia             | 2 (6.06%)               | 1 (6.25%)               |
| Hypernatremia             | 6 (18.18%)              | 2 (12.5%)               |
| Hypertension              | 1 (3.03%)               | 0 (0%)                  |
| Hypocalcemia              | 2 (6.06%)               | 0 (0%)                  |
| Hypoglycemia              | 4 (12.12%)              | 2 (12.5%)               |
| Hypokalemia               | 2 (6.06%)               | 1 (6.25%)               |
| Hyponatremia              | 1 (3.03%)               | 0 (0%)                  |
| Hypophosphatemia          | 3 (9.09%)               | 2 (12.5%)               |
| Influenza                 | 0 (0%)                  | 0 (0%)                  |
| Injection site erythema   | 6 (18.18%)              | 1 (6.25%)               |
| Injection site induration | 1 (3.03%)               | 0 (0%)                  |
| Injection site itching    | 7 (21.21%)              | 0 (0%)                  |
| Injection site pain       | 15 (45.45%)             | 4 (25%)                 |
| Injection site pruritus   | 2 (6.06%)               | 0 (0%)                  |

| <b>Event</b>               | <b>Vaccine (N = 33)</b> | <b>Placebo (N = 16)</b> |
|----------------------------|-------------------------|-------------------------|
| Injection site swelling    | 8 (24.24%)              | 0 (0%)                  |
| Injury                     | 1 (3.03%)               | 0 (0%)                  |
| Insect bite                | 0 (0%)                  | 1 (6.25%)               |
| Iron deficiency anemia     | 0 (0%)                  | 0 (0%)                  |
| Knee pain                  | 1 (3.03%)               | 0 (0%)                  |
| Laryngitis                 | 0 (0%)                  | 1 (6.25%)               |
| Local swelling             | 31 (93.94%)             | 15 (93.75%)             |
| Lymph node tenderness      | 1 (3.03%)               | 0 (0%)                  |
| Lymphocyte count increased | 1 (3.03%)               | 0 (0%)                  |
| Muscle ache                | 2 (6.06%)               | 0 (0%)                  |
| Muscle strain              | 1 (3.03%)               | 0 (0%)                  |
| Myalgia                    | 8 (24.24%)              | 5 (31.25%)              |
| Nasal congestion           | 3 (9.09%)               | 1 (6.25%)               |
| Nausea                     | 5 (15.15%)              | 2 (12.5%)               |
| Neutrophil count decreased | 5 (15.15%)              | 2 (12.5%)               |
| Oral pain                  | 0 (0%)                  | 0 (0%)                  |
| Peripheral neuropathy      | 0 (0%)                  | 1 (6.25%)               |
| Productive cough           | 1 (3.03%)               | 0 (0%)                  |
| Pruritic rash              | 1 (3.03%)               | 0 (0%)                  |
| Pruritus                   | 1 (3.03%)               | 0 (0%)                  |
| Rash                       | 0 (0%)                  | 2 (12.5%)               |
| Rhinorrhea                 | 1 (3.03%)               | 1 (6.25%)               |
| Sinusitis                  | 0 (0%)                  | 0 (0%)                  |
| Skin hyperpigmentation     | 2 (6.06%)               | 0 (0%)                  |
| Skin induration            | 1 (3.03%)               | 0 (0%)                  |
| Sore throat                | 3 (9.09%)               | 1 (6.25%)               |

| <b>Event</b>                      | <b>Vaccine (N = 33)</b> | <b>Placebo (N = 16)</b> |
|-----------------------------------|-------------------------|-------------------------|
| Systolic hypertension             | 1 (3.03%)               | 0 (0%)                  |
| Tenderness                        | 1 (3.03%)               | 0 (0%)                  |
| Tooth extraction                  | 0 (0%)                  | 0 (0%)                  |
| Torn bicep tendon                 | 0 (0%)                  | 0 (0%)                  |
| Upper respiratory tract infection | 1 (3.03%)               | 0 (0%)                  |
| Urinary frequency                 | 0 (0%)                  | 1 (6.25%)               |
| Urinary tract infection           | 0 (0%)                  | 0 (0%)                  |
| Urine WBC increased               | 2 (6.06%)               | 0 (0%)                  |
| Urticaria                         | 0 (0%)                  | 0 (0%)                  |
| Vertigo                           | 0 (0%)                  | 0 (0%)                  |
| Vitamin D deficiency              | 1 (3.03%)               | 0 (0%)                  |
| Vomiting                          | 1 (3.03%)               | 0 (0%)                  |
| WBC decreased                     | 0 (0%)                  | 2 (12.5%)               |
| WBC increased                     | 3 (9.09%)               | 1 (6.25%)               |

**Table 5 : Occurrence of Grade 2 Events by Treatment Group**

| <b>Event</b>                         | <b>Vaccine (N = 33)</b> | <b>Placebo (N = 16)</b> |
|--------------------------------------|-------------------------|-------------------------|
| Abdominal cramps                     | 0 (0%)                  | 0 (0%)                  |
| Abdominal pain                       | 0 (0%)                  | 0 (0%)                  |
| Absolute neutrophil count, decreased | 1 (3.03%)               | 1 (6.25%)               |
| Acute sinusitis                      | 0 (0%)                  | 0 (0%)                  |
| ALT increased                        | 0 (0%)                  | 0 (0%)                  |
| Anxiety                              | 0 (0%)                  | 0 (0%)                  |

| <b>Event</b>                | <b>Vaccine (N = 33)</b> | <b>Placebo (N = 16)</b> |
|-----------------------------|-------------------------|-------------------------|
| Arthralgia                  | 2 (6.06%)               | 0 (0%)                  |
| AST increased               | 0 (0%)                  | 0 (0%)                  |
| Bilirubin total high        | 0 (0%)                  | 0 (0%)                  |
| Blood eosinophils increased | 0 (0%)                  | 0 (0%)                  |
| Bradycardia                 | 0 (0%)                  | 0 (0%)                  |
| BUN increased               | 1 (3.03%)               | 0 (0%)                  |
| Campylobacter               | 0 (0%)                  | 0 (0%)                  |
| Candida vaginitis           | 0 (0%)                  | 0 (0%)                  |
| Chills                      | 3 (9.09%)               | 0 (0%)                  |
| Common cold                 | 0 (0%)                  | 0 (0%)                  |
| Constipation                | 0 (0%)                  | 0 (0%)                  |
| Coryza                      | 1 (3.03%)               | 0 (0%)                  |
| CPK increased               | 7 (21.21%)              | 4 (25%)                 |
| Creatine kinase             | 0 (0%)                  | 1 (6.25%)               |
| Creatine kinase high        | 2 (6.06%)               | 0 (0%)                  |
| Creatinine increased        | 0 (0%)                  | 0 (0%)                  |
| Dermatitis                  | 0 (0%)                  | 0 (0%)                  |
| Diaphoresis                 | 1 (3.03%)               | 0 (0%)                  |
| Diarrhea                    | 1 (3.03%)               | 0 (0%)                  |
| Difficulty sleeping         | 0 (0%)                  | 0 (0%)                  |
| Dry cough                   | 0 (0%)                  | 0 (0%)                  |
| Eczema                      | 0 (0%)                  | 0 (0%)                  |
| Elevated liver enzymes      | 0 (0%)                  | 0 (0%)                  |
| Elevated serum creatinine   | 0 (0%)                  | 0 (0%)                  |
| Eosinophilia                | 0 (0%)                  | 0 (0%)                  |
| Erythema                    | 1 (3.03%)               | 0 (0%)                  |

| <b>Event</b>              | <b>Vaccine (N = 33)</b> | <b>Placebo (N = 16)</b> |
|---------------------------|-------------------------|-------------------------|
| Eyelid Stye               | 0 (0%)                  | 0 (0%)                  |
| Fatigue                   | 3 (9.09%)               | 1 (6.25%)               |
| Fever                     | 1 (3.03%)               | 0 (0%)                  |
| Feverish                  | 3 (9.09%)               | 0 (0%)                  |
| Gastritis                 | 0 (0%)                  | 0 (0%)                  |
| Headache                  | 6 (18.18%)              | 0 (0%)                  |
| Hematuria                 | 0 (0%)                  | 2 (12.5%)               |
| Hemoglobin decreased      | 5 (15.15%)              | 1 (6.25%)               |
| Hyperglycemia             | 3 (9.09%)               | 2 (12.5%)               |
| Hypernatremia             | 1 (3.03%)               | 1 (6.25%)               |
| Hypertension              | 0 (0%)                  | 0 (0%)                  |
| Hypocalcemia              | 0 (0%)                  | 0 (0%)                  |
| Hypoglycemia              | 1 (3.03%)               | 2 (12.5%)               |
| Hypokalemia               | 2 (6.06%)               | 1 (6.25%)               |
| Hyponatremia              | 0 (0%)                  | 0 (0%)                  |
| Hypophosphatemia          | 4 (12.12%)              | 1 (6.25%)               |
| Influenza                 | 1 (3.03%)               | 0 (0%)                  |
| Injection site erythema   | 4 (12.12%)              | 0 (0%)                  |
| Injection site induration | 0 (0%)                  | 0 (0%)                  |
| Injection site itching    | 0 (0%)                  | 0 (0%)                  |
| Injection site pain       | 2 (6.06%)               | 1 (6.25%)               |
| Injection site pruritus   | 0 (0%)                  | 0 (0%)                  |
| Injection site swelling   | 1 (3.03%)               | 0 (0%)                  |
| Injury                    | 0 (0%)                  | 0 (0%)                  |
| Insect bite               | 0 (0%)                  | 0 (0%)                  |
| Iron deficiency anemia    | 1 (3.03%)               | 0 (0%)                  |

| <b>Event</b>               | <b>Vaccine (N = 33)</b> | <b>Placebo (N = 16)</b> |
|----------------------------|-------------------------|-------------------------|
| Knee pain                  | 0 (0%)                  | 0 (0%)                  |
| Laryngitis                 | 0 (0%)                  | 0 (0%)                  |
| Local swelling             | 0 (0%)                  | 0 (0%)                  |
| Lymph node tenderness      | 0 (0%)                  | 0 (0%)                  |
| Lymphocyte count increased | 0 (0%)                  | 0 (0%)                  |
| Muscle ache                | 0 (0%)                  | 0 (0%)                  |
| Muscle strain              | 0 (0%)                  | 0 (0%)                  |
| Myalgia                    | 2 (6.06%)               | 1 (6.25%)               |
| Nasal congestion           | 0 (0%)                  | 0 (0%)                  |
| Nausea                     | 1 (3.03%)               | 0 (0%)                  |
| Neutrophil count decreased | 1 (3.03%)               | 1 (6.25%)               |
| Oral pain                  | 1 (3.03%)               | 0 (0%)                  |
| Peripheral neuropathy      | 0 (0%)                  | 0 (0%)                  |
| Productive cough           | 0 (0%)                  | 0 (0%)                  |
| Pruritic rash              | 1 (3.03%)               | 0 (0%)                  |
| Pruritus                   | 0 (0%)                  | 0 (0%)                  |
| Rash                       | 0 (0%)                  | 0 (0%)                  |
| Rhinorrhea                 | 0 (0%)                  | 0 (0%)                  |
| Sinusitis                  | 1 (3.03%)               | 0 (0%)                  |
| Skin hyperpigmentation     | 0 (0%)                  | 0 (0%)                  |
| Skin induration            | 0 (0%)                  | 0 (0%)                  |
| Sore throat                | 2 (6.06%)               | 0 (0%)                  |
| Systolic hypertension      | 0 (0%)                  | 0 (0%)                  |
| Tenderness                 | 0 (0%)                  | 0 (0%)                  |
| Tooth extraction           | 1 (3.03%)               | 0 (0%)                  |
| Torn bicep tendon          | 0 (0%)                  | 0 (0%)                  |

| <b>Event</b>                      | <b>Vaccine (N = 33)</b> | <b>Placebo (N = 16)</b> |
|-----------------------------------|-------------------------|-------------------------|
| Upper respiratory tract infection | 0 (0%)                  | 0 (0%)                  |
| Urinary frequency                 | 0 (0%)                  | 0 (0%)                  |
| Urinary tract infection           | 0 (0%)                  | 0 (0%)                  |
| Urine WBC increased               | 0 (0%)                  | 0 (0%)                  |
| Urticaria                         | 0 (0%)                  | 0 (0%)                  |
| Vertigo                           | 0 (0%)                  | 0 (0%)                  |
| Vitamin D deficiency              | 0 (0%)                  | 0 (0%)                  |
| Vomiting                          | 1 (3.03%)               | 0 (0%)                  |
| WBC decreased                     | 0 (0%)                  | 1 (6.25%)               |
| WBC increased                     | 0 (0%)                  | 0 (0%)                  |

**Table 6 : Occurrence of Grade 3 Events by Treatment Group**

| <b>Event</b>                         | <b>Vaccine (N = 33)</b> | <b>Placebo (N = 16)</b> |
|--------------------------------------|-------------------------|-------------------------|
| Abdominal cramps                     | 0 (0%)                  | 0 (0%)                  |
| Abdominal pain                       | 0 (0%)                  | 0 (0%)                  |
| Absolute neutrophil count, decreased | 1 (3.03%)               | 1 (6.25%)               |
| Acute sinusitis                      | 0 (0%)                  | 0 (0%)                  |
| ALT increased                        | 0 (0%)                  | 0 (0%)                  |
| Anxiety                              | 0 (0%)                  | 0 (0%)                  |
| Arthralgia                           | 0 (0%)                  | 0 (0%)                  |
| AST increased                        | 0 (0%)                  | 0 (0%)                  |
| Bilirubin total high                 | 0 (0%)                  | 0 (0%)                  |
| Blood eosinophils increased          | 0 (0%)                  | 0 (0%)                  |
| Bradycardia                          | 1 (3.03%)               | 0 (0%)                  |
| BUN increased                        | 0 (0%)                  | 0 (0%)                  |
| Campylobacter                        | 0 (0%)                  | 0 (0%)                  |



| <b>Event</b>              | <b>Vaccine (N = 33)</b> | <b>Placebo (N = 16)</b> |
|---------------------------|-------------------------|-------------------------|
| Candida vaginitis         | 0 (0%)                  | 0 (0%)                  |
| Chills                    | 0 (0%)                  | 0 (0%)                  |
| Common cold               | 0 (0%)                  | 0 (0%)                  |
| Constipation              | 0 (0%)                  | 0 (0%)                  |
| Coryza                    | 0 (0%)                  | 0 (0%)                  |
| CPK increased             | 1 (3.03%)               | 3 (18.75%)              |
| Creatine kinase           | 0 (0%)                  | 0 (0%)                  |
| Creatine kinase high      | 0 (0%)                  | 1 (6.25%)               |
| Creatinine increased      | 0 (0%)                  | 0 (0%)                  |
| Dermatitis                | 1 (3.03%)               | 0 (0%)                  |
| Diaphoresis               | 0 (0%)                  | 0 (0%)                  |
| Diarrhea                  | 0 (0%)                  | 0 (0%)                  |
| Difficulty sleeping       | 0 (0%)                  | 0 (0%)                  |
| Dry cough                 | 0 (0%)                  | 0 (0%)                  |
| Eczema                    | 0 (0%)                  | 0 (0%)                  |
| Elevated liver enzymes    | 0 (0%)                  | 0 (0%)                  |
| Elevated serum creatinine | 0 (0%)                  | 0 (0%)                  |
| Eosinophilia              | 0 (0%)                  | 0 (0%)                  |
| Erythema                  | 0 (0%)                  | 0 (0%)                  |
| Eyelid Stye               | 0 (0%)                  | 0 (0%)                  |
| Fatigue                   | 0 (0%)                  | 0 (0%)                  |
| Fever                     | 0 (0%)                  | 0 (0%)                  |
| Feverish                  | 0 (0%)                  | 0 (0%)                  |
| Gastritis                 | 0 (0%)                  | 0 (0%)                  |
| Headache                  | 0 (0%)                  | 0 (0%)                  |
| Hematuria                 | 2 (6.06%)               | 0 (0%)                  |

| <b>Event</b>               | <b>Vaccine (N = 33)</b> | <b>Placebo (N = 16)</b> |
|----------------------------|-------------------------|-------------------------|
| Hemoglobin decreased       | 0 (0%)                  | 0 (0%)                  |
| Hyperglycemia              | 0 (0%)                  | 0 (0%)                  |
| Hypernatremia              | 1 (3.03%)               | 0 (0%)                  |
| Hypertension               | 0 (0%)                  | 0 (0%)                  |
| Hypocalcemia               | 0 (0%)                  | 0 (0%)                  |
| Hypoglycemia               | 2 (6.06%)               | 1 (6.25%)               |
| Hypokalemia                | 0 (0%)                  | 1 (6.25%)               |
| Hyponatremia               | 0 (0%)                  | 0 (0%)                  |
| Hypophosphatemia           | 0 (0%)                  | 0 (0%)                  |
| Influenza                  | 0 (0%)                  | 0 (0%)                  |
| Injection site erythema    | 1 (3.03%)               | 0 (0%)                  |
| Injection site induration  | 0 (0%)                  | 0 (0%)                  |
| Injection site itching     | 1 (3.03%)               | 0 (0%)                  |
| Injection site pain        | 0 (0%)                  | 0 (0%)                  |
| Injection site pruritus    | 0 (0%)                  | 0 (0%)                  |
| Injection site swelling    | 0 (0%)                  | 0 (0%)                  |
| Injury                     | 0 (0%)                  | 0 (0%)                  |
| Insect bite                | 0 (0%)                  | 0 (0%)                  |
| Iron deficiency anemia     | 0 (0%)                  | 0 (0%)                  |
| Knee pain                  | 0 (0%)                  | 0 (0%)                  |
| Laryngitis                 | 0 (0%)                  | 0 (0%)                  |
| Local swelling             | 0 (0%)                  | 0 (0%)                  |
| Lymph node tenderness      | 0 (0%)                  | 0 (0%)                  |
| Lymphocyte count increased | 0 (0%)                  | 0 (0%)                  |
| Muscle ache                | 0 (0%)                  | 0 (0%)                  |
| Muscle strain              | 0 (0%)                  | 0 (0%)                  |

| <b>Event</b>                      | <b>Vaccine (N = 33)</b> | <b>Placebo (N = 16)</b> |
|-----------------------------------|-------------------------|-------------------------|
| Myalgia                           | 0 (0%)                  | 0 (0%)                  |
| Nasal congestion                  | 0 (0%)                  | 0 (0%)                  |
| Nausea                            | 0 (0%)                  | 0 (0%)                  |
| Neutrophil count decreased        | 0 (0%)                  | 0 (0%)                  |
| Oral pain                         | 0 (0%)                  | 0 (0%)                  |
| Peripheral neuropathy             | 0 (0%)                  | 0 (0%)                  |
| Productive cough                  | 0 (0%)                  | 0 (0%)                  |
| Pruritic rash                     | 1 (3.03%)               | 0 (0%)                  |
| Pruritus                          | 0 (0%)                  | 0 (0%)                  |
| Rash                              | 0 (0%)                  | 1 (6.25%)               |
| Rhinorrhea                        | 0 (0%)                  | 0 (0%)                  |
| Sinusitis                         | 0 (0%)                  | 0 (0%)                  |
| Skin hyperpigmentation            | 0 (0%)                  | 0 (0%)                  |
| Skin induration                   | 0 (0%)                  | 0 (0%)                  |
| Sore throat                       | 0 (0%)                  | 0 (0%)                  |
| Systolic hypertension             | 0 (0%)                  | 0 (0%)                  |
| Tenderness                        | 0 (0%)                  | 0 (0%)                  |
| Tooth extraction                  | 0 (0%)                  | 0 (0%)                  |
| Torn bicep tendon                 | 1 (3.03%)               | 0 (0%)                  |
| Upper respiratory tract infection | 0 (0%)                  | 0 (0%)                  |
| Urinary frequency                 | 0 (0%)                  | 0 (0%)                  |
| Urinary tract infection           | 1 (3.03%)               | 1 (6.25%)               |
| Urine WBC increased               | 0 (0%)                  | 0 (0%)                  |
| Urticaria                         | 1 (3.03%)               | 0 (0%)                  |
| Vertigo                           | 0 (0%)                  | 1 (6.25%)               |
| Vitamin D deficiency              | 0 (0%)                  | 0 (0%)                  |

| <b>Event</b>  | <b>Vaccine (N = 33)</b> | <b>Placebo (N = 16)</b> |
|---------------|-------------------------|-------------------------|
| Vomiting      | 0 (0%)                  | 0 (0%)                  |
| WBC decreased | 0 (0%)                  | 0 (0%)                  |
| WBC increased | 0 (0%)                  | 0 (0%)                  |

**Table 7 : Occurrence of Grade 4 Events by Treatment Group**

| <b>Event</b>                         | <b>Vaccine (N = 33)</b> | <b>Placebo (N = 16)</b> |
|--------------------------------------|-------------------------|-------------------------|
| Abdominal cramps                     | 0 (0%)                  | 0 (0%)                  |
| Abdominal pain                       | 0 (0%)                  | 0 (0%)                  |
| Absolute neutrophil count, decreased | 0 (0%)                  | 0 (0%)                  |
| Acute sinusitis                      | 0 (0%)                  | 0 (0%)                  |
| ALT increased                        | 0 (0%)                  | 0 (0%)                  |
| Anxiety                              | 0 (0%)                  | 0 (0%)                  |
| Arthralgia                           | 0 (0%)                  | 0 (0%)                  |
| AST increased                        | 0 (0%)                  | 0 (0%)                  |
| Bilirubin total high                 | 0 (0%)                  | 0 (0%)                  |
| Blood eosinophils increased          | 0 (0%)                  | 0 (0%)                  |
| Bradycardia                          | 0 (0%)                  | 0 (0%)                  |
| BUN increased                        | 0 (0%)                  | 0 (0%)                  |
| Campylobacter                        | 0 (0%)                  | 0 (0%)                  |
| Candida vaginitis                    | 0 (0%)                  | 0 (0%)                  |
| Chills                               | 0 (0%)                  | 0 (0%)                  |
| Common cold                          | 0 (0%)                  | 0 (0%)                  |

| <b>Event</b>              | <b>Vaccine (N = 33)</b> | <b>Placebo (N = 16)</b> |
|---------------------------|-------------------------|-------------------------|
| Constipation              | 0 (0%)                  | 0 (0%)                  |
| Coryza                    | 0 (0%)                  | 0 (0%)                  |
| CPK increased             | 2 (6.06%)               | 0 (0%)                  |
| Creatine kinase           | 0 (0%)                  | 0 (0%)                  |
| Creatine kinase high      | 0 (0%)                  | 0 (0%)                  |
| Creatinine increased      | 0 (0%)                  | 0 (0%)                  |
| Dermatitis                | 0 (0%)                  | 0 (0%)                  |
| Diaphoresis               | 0 (0%)                  | 0 (0%)                  |
| Diarrhea                  | 0 (0%)                  | 0 (0%)                  |
| Difficulty sleeping       | 0 (0%)                  | 0 (0%)                  |
| Dry cough                 | 0 (0%)                  | 0 (0%)                  |
| Eczema                    | 0 (0%)                  | 0 (0%)                  |
| Elevated liver enzymes    | 0 (0%)                  | 0 (0%)                  |
| Elevated serum creatinine | 0 (0%)                  | 0 (0%)                  |
| Eosinophilia              | 0 (0%)                  | 0 (0%)                  |
| Erythema                  | 0 (0%)                  | 0 (0%)                  |
| Eyelid Stye               | 0 (0%)                  | 0 (0%)                  |
| Fatigue                   | 0 (0%)                  | 0 (0%)                  |
| Fever                     | 0 (0%)                  | 0 (0%)                  |
| Feverish                  | 0 (0%)                  | 0 (0%)                  |
| Gastritis                 | 0 (0%)                  | 0 (0%)                  |
| Headache                  | 0 (0%)                  | 0 (0%)                  |
| Hematuria                 | 0 (0%)                  | 0 (0%)                  |
| Hemoglobin decreased      | 0 (0%)                  | 0 (0%)                  |
| Hyperglycemia             | 0 (0%)                  | 0 (0%)                  |
| Hypernatremia             | 0 (0%)                  | 0 (0%)                  |

| <b>Event</b>               | <b>Vaccine (N = 33)</b> | <b>Placebo (N = 16)</b> |
|----------------------------|-------------------------|-------------------------|
| Hypertension               | 0 (0%)                  | 0 (0%)                  |
| Hypocalcemia               | 0 (0%)                  | 0 (0%)                  |
| Hypoglycemia               | 0 (0%)                  | 0 (0%)                  |
| Hypokalemia                | 0 (0%)                  | 0 (0%)                  |
| Hyponatremia               | 0 (0%)                  | 0 (0%)                  |
| Hypophosphatemia           | 0 (0%)                  | 0 (0%)                  |
| Influenza                  | 0 (0%)                  | 0 (0%)                  |
| Injection site erythema    | 0 (0%)                  | 0 (0%)                  |
| Injection site induration  | 0 (0%)                  | 0 (0%)                  |
| Injection site itching     | 0 (0%)                  | 0 (0%)                  |
| Injection site pain        | 0 (0%)                  | 0 (0%)                  |
| Injection site pruritus    | 0 (0%)                  | 0 (0%)                  |
| Injection site swelling    | 0 (0%)                  | 0 (0%)                  |
| Injury                     | 0 (0%)                  | 0 (0%)                  |
| Insect bite                | 0 (0%)                  | 0 (0%)                  |
| Iron deficiency anemia     | 0 (0%)                  | 0 (0%)                  |
| Knee pain                  | 0 (0%)                  | 0 (0%)                  |
| Laryngitis                 | 0 (0%)                  | 0 (0%)                  |
| Local swelling             | 0 (0%)                  | 0 (0%)                  |
| Lymph node tenderness      | 0 (0%)                  | 0 (0%)                  |
| Lymphocyte count increased | 0 (0%)                  | 0 (0%)                  |
| Muscle ache                | 0 (0%)                  | 0 (0%)                  |
| Muscle strain              | 0 (0%)                  | 0 (0%)                  |
| Myalgia                    | 0 (0%)                  | 0 (0%)                  |
| Nasal congestion           | 0 (0%)                  | 0 (0%)                  |
| Nausea                     | 0 (0%)                  | 0 (0%)                  |

| <b>Event</b>                      | <b>Vaccine (N = 33)</b> | <b>Placebo (N = 16)</b> |
|-----------------------------------|-------------------------|-------------------------|
| Neutrophil count decreased        | 0 (0%)                  | 0 (0%)                  |
| Oral pain                         | 0 (0%)                  | 0 (0%)                  |
| Peripheral neuropathy             | 0 (0%)                  | 0 (0%)                  |
| Productive cough                  | 0 (0%)                  | 0 (0%)                  |
| Pruritic rash                     | 0 (0%)                  | 0 (0%)                  |
| Pruritus                          | 0 (0%)                  | 0 (0%)                  |
| Rash                              | 0 (0%)                  | 0 (0%)                  |
| Rhinorrhea                        | 0 (0%)                  | 0 (0%)                  |
| Sinusitis                         | 0 (0%)                  | 0 (0%)                  |
| Skin hyperpigmentation            | 0 (0%)                  | 0 (0%)                  |
| Skin induration                   | 0 (0%)                  | 0 (0%)                  |
| Sore throat                       | 0 (0%)                  | 0 (0%)                  |
| Systolic hypertension             | 0 (0%)                  | 0 (0%)                  |
| Tenderness                        | 0 (0%)                  | 0 (0%)                  |
| Tooth extraction                  | 0 (0%)                  | 0 (0%)                  |
| Torn bicep tendon                 | 0 (0%)                  | 0 (0%)                  |
| Upper respiratory tract infection | 0 (0%)                  | 0 (0%)                  |
| Urinary frequency                 | 0 (0%)                  | 0 (0%)                  |
| Urinary tract infection           | 0 (0%)                  | 0 (0%)                  |
| Urine WBC increased               | 0 (0%)                  | 0 (0%)                  |
| Urticaria                         | 0 (0%)                  | 0 (0%)                  |
| Vertigo                           | 0 (0%)                  | 0 (0%)                  |
| Vitamin D deficiency              | 0 (0%)                  | 0 (0%)                  |
| Vomiting                          | 0 (0%)                  | 0 (0%)                  |
| WBC decreased                     | 0 (0%)                  | 0 (0%)                  |
| WBC increased                     | 0 (0%)                  | 0 (0%)                  |

**Table 8 : Occurrence of Max Grade Events Per Subject which are Unrelated to Treatment by Treatment Group**

**Note : In Tables 8-12, multiple occurrences of the same max grade event type with different relatedness are included in the respective table**

| Event                                | Vaccine (N = 33) |         |               |              |              |         | Placebo (N = 16) |         |              |         |              |         |
|--------------------------------------|------------------|---------|---------------|--------------|--------------|---------|------------------|---------|--------------|---------|--------------|---------|
|                                      | No Sx            | Grade 0 | Grade 1       | Grade 2      | Grade 3      | Grade 4 | No Sx            | Grade 0 | Grade 1      | Grade 2 | Grade 3      | Grade 4 |
| Abdominal cramps                     | 32<br>(96.97%)   | 0 (0%)  | 1<br>(3.03%)  | 0 (0%)       | 0 (0%)       | 0 (0%)  | 16<br>(100%)     | 0 (0%)  | 0 (0%)       | 0 (0%)  | 0 (0%)       | 0 (0%)  |
| Abdominal pain                       | 33<br>(100%)     | 0 (0%)  | 0 (0%)        | 0 (0%)       | 0 (0%)       | 0 (0%)  | 15<br>(93.75%)   | 0 (0%)  | 1<br>(6.25%) | 0 (0%)  | 0 (0%)       | 0 (0%)  |
| Absolute neutrophil count, decreased | 31<br>(93.94%)   | 0 (0%)  | 1<br>(3.03%)  | 0 (0%)       | 1<br>(3.03%) | 0 (0%)  | 15<br>(93.75%)   | 0 (0%)  | 0 (0%)       | 0 (0%)  | 1<br>(6.25%) | 0 (0%)  |
| Acute sinusitis                      | 33<br>(100%)     | 0 (0%)  | 0 (0%)        | 0 (0%)       | 0 (0%)       | 0 (0%)  | 16<br>(100%)     | 0 (0%)  | 0 (0%)       | 0 (0%)  | 0 (0%)       | 0 (0%)  |
| ALT increased                        | 31<br>(93.94%)   | 0 (0%)  | 2<br>(6.06%)  | 0 (0%)       | 0 (0%)       | 0 (0%)  | 16<br>(100%)     | 0 (0%)  | 0 (0%)       | 0 (0%)  | 0 (0%)       | 0 (0%)  |
| Anxiety                              | 32<br>(96.97%)   | 0 (0%)  | 1<br>(3.03%)  | 0 (0%)       | 0 (0%)       | 0 (0%)  | 16<br>(100%)     | 0 (0%)  | 0 (0%)       | 0 (0%)  | 0 (0%)       | 0 (0%)  |
| Arthralgia                           | 33<br>(100%)     | 0 (0%)  | 0 (0%)        | 0 (0%)       | 0 (0%)       | 0 (0%)  | 16<br>(100%)     | 0 (0%)  | 0 (0%)       | 0 (0%)  | 0 (0%)       | 0 (0%)  |
| AST increased                        | 29<br>(87.88%)   | 0 (0%)  | 4<br>(12.12%) | 0 (0%)       | 0 (0%)       | 0 (0%)  | 15<br>(93.75%)   | 0 (0%)  | 1<br>(6.25%) | 0 (0%)  | 0 (0%)       | 0 (0%)  |
| Bilirubin total high                 | 32<br>(96.97%)   | 0 (0%)  | 1<br>(3.03%)  | 0 (0%)       | 0 (0%)       | 0 (0%)  | 16<br>(100%)     | 0 (0%)  | 0 (0%)       | 0 (0%)  | 0 (0%)       | 0 (0%)  |
| Blood eosinophils increased          | 32<br>(96.97%)   | 0 (0%)  | 1<br>(3.03%)  | 0 (0%)       | 0 (0%)       | 0 (0%)  | 16<br>(100%)     | 0 (0%)  | 0 (0%)       | 0 (0%)  | 0 (0%)       | 0 (0%)  |
| Bradycardia                          | 31<br>(93.94%)   | 0 (0%)  | 1<br>(3.03%)  | 0 (0%)       | 1<br>(3.03%) | 0 (0%)  | 16<br>(100%)     | 0 (0%)  | 0 (0%)       | 0 (0%)  | 0 (0%)       | 0 (0%)  |
| BUN increased                        | 32<br>(96.97%)   | 0 (0%)  | 0 (0%)        | 1<br>(3.03%) | 0 (0%)       | 0 (0%)  | 15<br>(93.75%)   | 0 (0%)  | 1<br>(6.25%) | 0 (0%)  | 0 (0%)       | 0 (0%)  |
| Campylobacter                        | 33<br>(100%)     | 0 (0%)  | 0 (0%)        | 0 (0%)       | 0 (0%)       | 0 (0%)  | 15<br>(93.75%)   | 0 (0%)  | 1<br>(6.25%) | 0 (0%)  | 0 (0%)       | 0 (0%)  |
| Candida vaginitis                    | 33<br>(100%)     | 0 (0%)  | 0 (0%)        | 0 (0%)       | 0 (0%)       | 0 (0%)  | 16<br>(100%)     | 0 (0%)  | 0 (0%)       | 0 (0%)  | 0 (0%)       | 0 (0%)  |
| Chills                               | 32<br>(96.97%)   | 0 (0%)  | 1<br>(3.03%)  | 0 (0%)       | 0 (0%)       | 0 (0%)  | 16<br>(100%)     | 0 (0%)  | 0 (0%)       | 0 (0%)  | 0 (0%)       | 0 (0%)  |



| Event                     | Vaccine (N = 33) |         |              |              |              |              | Placebo (N = 16) |         |              |              |               |         |
|---------------------------|------------------|---------|--------------|--------------|--------------|--------------|------------------|---------|--------------|--------------|---------------|---------|
|                           | No Sx            | Grade 0 | Grade 1      | Grade 2      | Grade 3      | Grade 4      | No Sx            | Grade 0 | Grade 1      | Grade 2      | Grade 3       | Grade 4 |
| Common cold               | 33<br>(100%)     | 0 (0%)  | 0 (0%)       | 0 (0%)       | 0 (0%)       | 0 (0%)       | 16<br>(100%)     | 0 (0%)  | 0 (0%)       | 0 (0%)       | 0 (0%)        | 0 (0%)  |
| Constipation              | 33<br>(100%)     | 0 (0%)  | 0 (0%)       | 0 (0%)       | 0 (0%)       | 0 (0%)       | 15<br>(93.75%)   | 0 (0%)  | 1<br>(6.25%) | 0 (0%)       | 0 (0%)        | 0 (0%)  |
| Coryza                    | 31<br>(93.94%)   | 0 (0%)  | 1<br>(3.03%) | 1<br>(3.03%) | 0 (0%)       | 0 (0%)       | 15<br>(93.75%)   | 0 (0%)  | 1<br>(6.25%) | 0 (0%)       | 0 (0%)        | 0 (0%)  |
| CPK increased             | 28<br>(84.85%)   | 0 (0%)  | 0 (0%)       | 3<br>(9.09%) | 1<br>(3.03%) | 1<br>(3.03%) | 10<br>(62.5%)    | 0 (0%)  | 1<br>(6.25%) | 2<br>(12.5%) | 3<br>(18.75%) | 0 (0%)  |
| Creatine kinase           | 33<br>(100%)     | 0 (0%)  | 0 (0%)       | 0 (0%)       | 0 (0%)       | 0 (0%)       | 16<br>(100%)     | 0 (0%)  | 0 (0%)       | 0 (0%)       | 0 (0%)        | 0 (0%)  |
| Creatine kinase high      | 31<br>(93.94%)   | 0 (0%)  | 0 (0%)       | 2<br>(6.06%) | 0 (0%)       | 0 (0%)       | 16<br>(100%)     | 0 (0%)  | 0 (0%)       | 0 (0%)       | 0 (0%)        | 0 (0%)  |
| Creatinine increased      | 32<br>(96.97%)   | 0 (0%)  | 1<br>(3.03%) | 0 (0%)       | 0 (0%)       | 0 (0%)       | 16<br>(100%)     | 0 (0%)  | 0 (0%)       | 0 (0%)       | 0 (0%)        | 0 (0%)  |
| Dermatitis                | 33<br>(100%)     | 0 (0%)  | 0 (0%)       | 0 (0%)       | 0 (0%)       | 0 (0%)       | 16<br>(100%)     | 0 (0%)  | 0 (0%)       | 0 (0%)       | 0 (0%)        | 0 (0%)  |
| Diaphoresis               | 32<br>(96.97%)   | 0 (0%)  | 1<br>(3.03%) | 0 (0%)       | 0 (0%)       | 0 (0%)       | 16<br>(100%)     | 0 (0%)  | 0 (0%)       | 0 (0%)       | 0 (0%)        | 0 (0%)  |
| Diarrhea                  | 32<br>(96.97%)   | 0 (0%)  | 0 (0%)       | 1<br>(3.03%) | 0 (0%)       | 0 (0%)       | 15<br>(93.75%)   | 0 (0%)  | 1<br>(6.25%) | 0 (0%)       | 0 (0%)        | 0 (0%)  |
| Difficulty sleeping       | 32<br>(96.97%)   | 0 (0%)  | 1<br>(3.03%) | 0 (0%)       | 0 (0%)       | 0 (0%)       | 16<br>(100%)     | 0 (0%)  | 0 (0%)       | 0 (0%)       | 0 (0%)        | 0 (0%)  |
| Dry cough                 | 31<br>(93.94%)   | 0 (0%)  | 2<br>(6.06%) | 0 (0%)       | 0 (0%)       | 0 (0%)       | 16<br>(100%)     | 0 (0%)  | 0 (0%)       | 0 (0%)       | 0 (0%)        | 0 (0%)  |
| Eczema                    | 32<br>(96.97%)   | 0 (0%)  | 1<br>(3.03%) | 0 (0%)       | 0 (0%)       | 0 (0%)       | 16<br>(100%)     | 0 (0%)  | 0 (0%)       | 0 (0%)       | 0 (0%)        | 0 (0%)  |
| Elevated liver enzymes    | 33<br>(100%)     | 0 (0%)  | 0 (0%)       | 0 (0%)       | 0 (0%)       | 0 (0%)       | 16<br>(100%)     | 0 (0%)  | 0 (0%)       | 0 (0%)       | 0 (0%)        | 0 (0%)  |
| Elevated serum creatinine | 32<br>(96.97%)   | 0 (0%)  | 1<br>(3.03%) | 0 (0%)       | 0 (0%)       | 0 (0%)       | 16<br>(100%)     | 0 (0%)  | 0 (0%)       | 0 (0%)       | 0 (0%)        | 0 (0%)  |
| Eosinophilia              | 33<br>(100%)     | 0 (0%)  | 0 (0%)       | 0 (0%)       | 0 (0%)       | 0 (0%)       | 16<br>(100%)     | 0 (0%)  | 0 (0%)       | 0 (0%)       | 0 (0%)        | 0 (0%)  |
| Erythema                  | 33<br>(100%)     | 0 (0%)  | 0 (0%)       | 0 (0%)       | 0 (0%)       | 0 (0%)       | 16<br>(100%)     | 0 (0%)  | 0 (0%)       | 0 (0%)       | 0 (0%)        | 0 (0%)  |

| Event                | Vaccine (N = 33) |         |               |               |              |         | Placebo (N = 16) |         |              |              |              |         |
|----------------------|------------------|---------|---------------|---------------|--------------|---------|------------------|---------|--------------|--------------|--------------|---------|
|                      | No Sx            | Grade 0 | Grade 1       | Grade 2       | Grade 3      | Grade 4 | No Sx            | Grade 0 | Grade 1      | Grade 2      | Grade 3      | Grade 4 |
| Eyelid Styte         | 33<br>(100%)     | 0 (0%)  | 0 (0%)        | 0 (0%)        | 0 (0%)       | 0 (0%)  | 16<br>(100%)     | 0 (0%)  | 0 (0%)       | 0 (0%)       | 0 (0%)       | 0 (0%)  |
| Fatigue              | 33<br>(100%)     | 0 (0%)  | 0 (0%)        | 0 (0%)        | 0 (0%)       | 0 (0%)  | 15<br>(93.75%)   | 0 (0%)  | 1<br>(6.25%) | 0 (0%)       | 0 (0%)       | 0 (0%)  |
| Fever                | 33<br>(100%)     | 0 (0%)  | 0 (0%)        | 0 (0%)        | 0 (0%)       | 0 (0%)  | 16<br>(100%)     | 0 (0%)  | 0 (0%)       | 0 (0%)       | 0 (0%)       | 0 (0%)  |
| Feverish             | 32<br>(96.97%)   | 0 (0%)  | 1<br>(3.03%)  | 0 (0%)        | 0 (0%)       | 0 (0%)  | 15<br>(93.75%)   | 0 (0%)  | 1<br>(6.25%) | 0 (0%)       | 0 (0%)       | 0 (0%)  |
| Gastritis            | 33<br>(100%)     | 0 (0%)  | 0 (0%)        | 0 (0%)        | 0 (0%)       | 0 (0%)  | 15<br>(93.75%)   | 0 (0%)  | 1<br>(6.25%) | 0 (0%)       | 0 (0%)       | 0 (0%)  |
| Headache             | 30<br>(90.91%)   | 0 (0%)  | 2<br>(6.06%)  | 1<br>(3.03%)  | 0 (0%)       | 0 (0%)  | 16<br>(100%)     | 0 (0%)  | 0 (0%)       | 0 (0%)       | 0 (0%)       | 0 (0%)  |
| Hematuria            | 29<br>(87.88%)   | 0 (0%)  | 2<br>(6.06%)  | 0 (0%)        | 2<br>(6.06%) | 0 (0%)  | 15<br>(93.75%)   | 0 (0%)  | 1<br>(6.25%) | 0 (0%)       | 0 (0%)       | 0 (0%)  |
| Hemoglobin decreased | 23<br>(69.7%)    | 0 (0%)  | 6<br>(18.18%) | 4<br>(12.12%) | 0 (0%)       | 0 (0%)  | 13<br>(81.25%)   | 0 (0%)  | 2<br>(12.5%) | 1<br>(6.25%) | 0 (0%)       | 0 (0%)  |
| Hyperglycemia        | 30<br>(90.91%)   | 0 (0%)  | 0 (0%)        | 3<br>(9.09%)  | 0 (0%)       | 0 (0%)  | 14<br>(87.5%)    | 0 (0%)  | 0 (0%)       | 2<br>(12.5%) | 0 (0%)       | 0 (0%)  |
| Hypernatremia        | 27<br>(81.82%)   | 0 (0%)  | 4<br>(12.12%) | 1<br>(3.03%)  | 1<br>(3.03%) | 0 (0%)  | 14<br>(87.5%)    | 0 (0%)  | 2<br>(12.5%) | 0 (0%)       | 0 (0%)       | 0 (0%)  |
| Hypertension         | 32<br>(96.97%)   | 0 (0%)  | 1<br>(3.03%)  | 0 (0%)        | 0 (0%)       | 0 (0%)  | 16<br>(100%)     | 0 (0%)  | 0 (0%)       | 0 (0%)       | 0 (0%)       | 0 (0%)  |
| Hypocalcemia         | 31<br>(93.94%)   | 0 (0%)  | 2<br>(6.06%)  | 0 (0%)        | 0 (0%)       | 0 (0%)  | 16<br>(100%)     | 0 (0%)  | 0 (0%)       | 0 (0%)       | 0 (0%)       | 0 (0%)  |
| Hypoglycemia         | 28<br>(84.85%)   | 0 (0%)  | 3<br>(9.09%)  | 0 (0%)        | 2<br>(6.06%) | 0 (0%)  | 13<br>(81.25%)   | 0 (0%)  | 1<br>(6.25%) | 1<br>(6.25%) | 1<br>(6.25%) | 0 (0%)  |
| Hypokalemia          | 31<br>(93.94%)   | 0 (0%)  | 1<br>(3.03%)  | 1<br>(3.03%)  | 0 (0%)       | 0 (0%)  | 14<br>(87.5%)    | 0 (0%)  | 1<br>(6.25%) | 1<br>(6.25%) | 0 (0%)       | 0 (0%)  |
| Hyponatremia         | 33<br>(100%)     | 0 (0%)  | 0 (0%)        | 0 (0%)        | 0 (0%)       | 0 (0%)  | 16<br>(100%)     | 0 (0%)  | 0 (0%)       | 0 (0%)       | 0 (0%)       | 0 (0%)  |
| Hypophosphatemia     | 28<br>(84.85%)   | 0 (0%)  | 1<br>(3.03%)  | 4<br>(12.12%) | 0 (0%)       | 0 (0%)  | 15<br>(93.75%)   | 0 (0%)  | 0 (0%)       | 1<br>(6.25%) | 0 (0%)       | 0 (0%)  |
| Influenza            | 33<br>(100%)     | 0 (0%)  | 0 (0%)        | 0 (0%)        | 0 (0%)       | 0 (0%)  | 16<br>(100%)     | 0 (0%)  | 0 (0%)       | 0 (0%)       | 0 (0%)       | 0 (0%)  |

| Event                      | Vaccine (N = 33) |         |              |              |         |         | Placebo (N = 16) |         |              |         |         |         |
|----------------------------|------------------|---------|--------------|--------------|---------|---------|------------------|---------|--------------|---------|---------|---------|
|                            | No Sx            | Grade 0 | Grade 1      | Grade 2      | Grade 3 | Grade 4 | No Sx            | Grade 0 | Grade 1      | Grade 2 | Grade 3 | Grade 4 |
| Injection site erythema    | 33<br>(100%)     | 0 (0%)  | 0 (0%)       | 0 (0%)       | 0 (0%)  | 0 (0%)  | 16<br>(100%)     | 0 (0%)  | 0 (0%)       | 0 (0%)  | 0 (0%)  | 0 (0%)  |
| Injection site induration  | 33<br>(100%)     | 0 (0%)  | 0 (0%)       | 0 (0%)       | 0 (0%)  | 0 (0%)  | 16<br>(100%)     | 0 (0%)  | 0 (0%)       | 0 (0%)  | 0 (0%)  | 0 (0%)  |
| Injection site itching     | 33<br>(100%)     | 0 (0%)  | 0 (0%)       | 0 (0%)       | 0 (0%)  | 0 (0%)  | 16<br>(100%)     | 0 (0%)  | 0 (0%)       | 0 (0%)  | 0 (0%)  | 0 (0%)  |
| Injection site pain        | 33<br>(100%)     | 0 (0%)  | 0 (0%)       | 0 (0%)       | 0 (0%)  | 0 (0%)  | 16<br>(100%)     | 0 (0%)  | 0 (0%)       | 0 (0%)  | 0 (0%)  | 0 (0%)  |
| Injection site pruritus    | 33<br>(100%)     | 0 (0%)  | 0 (0%)       | 0 (0%)       | 0 (0%)  | 0 (0%)  | 16<br>(100%)     | 0 (0%)  | 0 (0%)       | 0 (0%)  | 0 (0%)  | 0 (0%)  |
| Injection site swelling    | 33<br>(100%)     | 0 (0%)  | 0 (0%)       | 0 (0%)       | 0 (0%)  | 0 (0%)  | 16<br>(100%)     | 0 (0%)  | 0 (0%)       | 0 (0%)  | 0 (0%)  | 0 (0%)  |
| Injury                     | 32<br>(96.97%)   | 0 (0%)  | 1<br>(3.03%) | 0 (0%)       | 0 (0%)  | 0 (0%)  | 16<br>(100%)     | 0 (0%)  | 0 (0%)       | 0 (0%)  | 0 (0%)  | 0 (0%)  |
| Insect bite                | 33<br>(100%)     | 0 (0%)  | 0 (0%)       | 0 (0%)       | 0 (0%)  | 0 (0%)  | 15<br>(93.75%)   | 0 (0%)  | 1<br>(6.25%) | 0 (0%)  | 0 (0%)  | 0 (0%)  |
| Iron deficiency anemia     | 32<br>(96.97%)   | 0 (0%)  | 0 (0%)       | 1<br>(3.03%) | 0 (0%)  | 0 (0%)  | 16<br>(100%)     | 0 (0%)  | 0 (0%)       | 0 (0%)  | 0 (0%)  | 0 (0%)  |
| Knee pain                  | 32<br>(96.97%)   | 0 (0%)  | 1<br>(3.03%) | 0 (0%)       | 0 (0%)  | 0 (0%)  | 16<br>(100%)     | 0 (0%)  | 0 (0%)       | 0 (0%)  | 0 (0%)  | 0 (0%)  |
| Laryngitis                 | 33<br>(100%)     | 0 (0%)  | 0 (0%)       | 0 (0%)       | 0 (0%)  | 0 (0%)  | 15<br>(93.75%)   | 0 (0%)  | 1<br>(6.25%) | 0 (0%)  | 0 (0%)  | 0 (0%)  |
| Local swelling             | 33<br>(100%)     | 0 (0%)  | 0 (0%)       | 0 (0%)       | 0 (0%)  | 0 (0%)  | 16<br>(100%)     | 0 (0%)  | 0 (0%)       | 0 (0%)  | 0 (0%)  | 0 (0%)  |
| Lymph node tenderness      | 32<br>(96.97%)   | 0 (0%)  | 1<br>(3.03%) | 0 (0%)       | 0 (0%)  | 0 (0%)  | 16<br>(100%)     | 0 (0%)  | 0 (0%)       | 0 (0%)  | 0 (0%)  | 0 (0%)  |
| Lymphocyte count increased | 32<br>(96.97%)   | 0 (0%)  | 1<br>(3.03%) | 0 (0%)       | 0 (0%)  | 0 (0%)  | 16<br>(100%)     | 0 (0%)  | 0 (0%)       | 0 (0%)  | 0 (0%)  | 0 (0%)  |
| Muscle ache                | 33<br>(100%)     | 0 (0%)  | 0 (0%)       | 0 (0%)       | 0 (0%)  | 0 (0%)  | 16<br>(100%)     | 0 (0%)  | 0 (0%)       | 0 (0%)  | 0 (0%)  | 0 (0%)  |
| Muscle strain              | 32<br>(96.97%)   | 0 (0%)  | 1<br>(3.03%) | 0 (0%)       | 0 (0%)  | 0 (0%)  | 16<br>(100%)     | 0 (0%)  | 0 (0%)       | 0 (0%)  | 0 (0%)  | 0 (0%)  |
| Myalgia                    | 33<br>(100%)     | 0 (0%)  | 0 (0%)       | 0 (0%)       | 0 (0%)  | 0 (0%)  | 15<br>(93.75%)   | 0 (0%)  | 1<br>(6.25%) | 0 (0%)  | 0 (0%)  | 0 (0%)  |

| Event                      | Vaccine (N = 33) |         |              |              |         |         | Placebo (N = 16) |         |              |         |              |         |
|----------------------------|------------------|---------|--------------|--------------|---------|---------|------------------|---------|--------------|---------|--------------|---------|
|                            | No Sx            | Grade 0 | Grade 1      | Grade 2      | Grade 3 | Grade 4 | No Sx            | Grade 0 | Grade 1      | Grade 2 | Grade 3      | Grade 4 |
| Nasal congestion           | 32<br>(96.97%)   | 0 (0%)  | 1<br>(3.03%) | 0 (0%)       | 0 (0%)  | 0 (0%)  | 15<br>(93.75%)   | 0 (0%)  | 1<br>(6.25%) | 0 (0%)  | 0 (0%)       | 0 (0%)  |
| Nausea                     | 33<br>(100%)     | 0 (0%)  | 0 (0%)       | 0 (0%)       | 0 (0%)  | 0 (0%)  | 15<br>(93.75%)   | 0 (0%)  | 1<br>(6.25%) | 0 (0%)  | 0 (0%)       | 0 (0%)  |
| Neutrophil count decreased | 29<br>(87.88%)   | 0 (0%)  | 3<br>(9.09%) | 1<br>(3.03%) | 0 (0%)  | 0 (0%)  | 14<br>(87.5%)    | 0 (0%)  | 2<br>(12.5%) | 0 (0%)  | 0 (0%)       | 0 (0%)  |
| Oral pain                  | 32<br>(96.97%)   | 0 (0%)  | 0 (0%)       | 1<br>(3.03%) | 0 (0%)  | 0 (0%)  | 16<br>(100%)     | 0 (0%)  | 0 (0%)       | 0 (0%)  | 0 (0%)       | 0 (0%)  |
| Peripheral neuropathy      | 33<br>(100%)     | 0 (0%)  | 0 (0%)       | 0 (0%)       | 0 (0%)  | 0 (0%)  | 16<br>(100%)     | 0 (0%)  | 0 (0%)       | 0 (0%)  | 0 (0%)       | 0 (0%)  |
| Productive cough           | 32<br>(96.97%)   | 0 (0%)  | 1<br>(3.03%) | 0 (0%)       | 0 (0%)  | 0 (0%)  | 16<br>(100%)     | 0 (0%)  | 0 (0%)       | 0 (0%)  | 0 (0%)       | 0 (0%)  |
| Pruritic rash              | 33<br>(100%)     | 0 (0%)  | 0 (0%)       | 0 (0%)       | 0 (0%)  | 0 (0%)  | 16<br>(100%)     | 0 (0%)  | 0 (0%)       | 0 (0%)  | 0 (0%)       | 0 (0%)  |
| Pruritus                   | 33<br>(100%)     | 0 (0%)  | 0 (0%)       | 0 (0%)       | 0 (0%)  | 0 (0%)  | 16<br>(100%)     | 0 (0%)  | 0 (0%)       | 0 (0%)  | 0 (0%)       | 0 (0%)  |
| Rash                       | 33<br>(100%)     | 0 (0%)  | 0 (0%)       | 0 (0%)       | 0 (0%)  | 0 (0%)  | 15<br>(93.75%)   | 0 (0%)  | 0 (0%)       | 0 (0%)  | 1<br>(6.25%) | 0 (0%)  |
| Rhinorrhea                 | 32<br>(96.97%)   | 0 (0%)  | 1<br>(3.03%) | 0 (0%)       | 0 (0%)  | 0 (0%)  | 15<br>(93.75%)   | 0 (0%)  | 1<br>(6.25%) | 0 (0%)  | 0 (0%)       | 0 (0%)  |
| Sinusitis                  | 32<br>(96.97%)   | 0 (0%)  | 0 (0%)       | 1<br>(3.03%) | 0 (0%)  | 0 (0%)  | 16<br>(100%)     | 0 (0%)  | 0 (0%)       | 0 (0%)  | 0 (0%)       | 0 (0%)  |
| Skin hyperpigmentation     | 33<br>(100%)     | 0 (0%)  | 0 (0%)       | 0 (0%)       | 0 (0%)  | 0 (0%)  | 16<br>(100%)     | 0 (0%)  | 0 (0%)       | 0 (0%)  | 0 (0%)       | 0 (0%)  |
| Skin induration            | 33<br>(100%)     | 0 (0%)  | 0 (0%)       | 0 (0%)       | 0 (0%)  | 0 (0%)  | 16<br>(100%)     | 0 (0%)  | 0 (0%)       | 0 (0%)  | 0 (0%)       | 0 (0%)  |
| Sore throat                | 31<br>(93.94%)   | 0 (0%)  | 1<br>(3.03%) | 1<br>(3.03%) | 0 (0%)  | 0 (0%)  | 15<br>(93.75%)   | 0 (0%)  | 1<br>(6.25%) | 0 (0%)  | 0 (0%)       | 0 (0%)  |
| Systolic hypertension      | 32<br>(96.97%)   | 0 (0%)  | 1<br>(3.03%) | 0 (0%)       | 0 (0%)  | 0 (0%)  | 16<br>(100%)     | 0 (0%)  | 0 (0%)       | 0 (0%)  | 0 (0%)       | 0 (0%)  |
| Tenderness                 | 33<br>(100%)     | 0 (0%)  | 0 (0%)       | 0 (0%)       | 0 (0%)  | 0 (0%)  | 16<br>(100%)     | 0 (0%)  | 0 (0%)       | 0 (0%)  | 0 (0%)       | 0 (0%)  |
| Tooth extraction           | 32<br>(96.97%)   | 0 (0%)  | 0 (0%)       | 1<br>(3.03%) | 0 (0%)  | 0 (0%)  | 16<br>(100%)     | 0 (0%)  | 0 (0%)       | 0 (0%)  | 0 (0%)       | 0 (0%)  |

| Event                             | Vaccine (N = 33) |         |              |         |              |         | Placebo (N = 16) |         |              |              |         |         |
|-----------------------------------|------------------|---------|--------------|---------|--------------|---------|------------------|---------|--------------|--------------|---------|---------|
|                                   | No Sx            | Grade 0 | Grade 1      | Grade 2 | Grade 3      | Grade 4 | No Sx            | Grade 0 | Grade 1      | Grade 2      | Grade 3 | Grade 4 |
| Torn bicep tendon                 | 32<br>(96.97%)   | 0 (0%)  | 0 (0%)       | 0 (0%)  | 1<br>(3.03%) | 0 (0%)  | 16<br>(100%)     | 0 (0%)  | 0 (0%)       | 0 (0%)       | 0 (0%)  | 0 (0%)  |
| Upper respiratory tract infection | 32<br>(96.97%)   | 0 (0%)  | 1<br>(3.03%) | 0 (0%)  | 0 (0%)       | 0 (0%)  | 16<br>(100%)     | 0 (0%)  | 0 (0%)       | 0 (0%)       | 0 (0%)  | 0 (0%)  |
| Urinary frequency                 | 33<br>(100%)     | 0 (0%)  | 0 (0%)       | 0 (0%)  | 0 (0%)       | 0 (0%)  | 16<br>(100%)     | 0 (0%)  | 0 (0%)       | 0 (0%)       | 0 (0%)  | 0 (0%)  |
| Urinary tract infection           | 32<br>(96.97%)   | 0 (0%)  | 0 (0%)       | 0 (0%)  | 1<br>(3.03%) | 0 (0%)  | 16<br>(100%)     | 0 (0%)  | 0 (0%)       | 0 (0%)       | 0 (0%)  | 0 (0%)  |
| Urine WBC increased               | 31<br>(93.94%)   | 0 (0%)  | 2<br>(6.06%) | 0 (0%)  | 0 (0%)       | 0 (0%)  | 16<br>(100%)     | 0 (0%)  | 0 (0%)       | 0 (0%)       | 0 (0%)  | 0 (0%)  |
| Urticaria                         | 33<br>(100%)     | 0 (0%)  | 0 (0%)       | 0 (0%)  | 0 (0%)       | 0 (0%)  | 16<br>(100%)     | 0 (0%)  | 0 (0%)       | 0 (0%)       | 0 (0%)  | 0 (0%)  |
| Vertigo                           | 33<br>(100%)     | 0 (0%)  | 0 (0%)       | 0 (0%)  | 0 (0%)       | 0 (0%)  | 16<br>(100%)     | 0 (0%)  | 0 (0%)       | 0 (0%)       | 0 (0%)  | 0 (0%)  |
| Vitamin D deficiency              | 32<br>(96.97%)   | 0 (0%)  | 1<br>(3.03%) | 0 (0%)  | 0 (0%)       | 0 (0%)  | 16<br>(100%)     | 0 (0%)  | 0 (0%)       | 0 (0%)       | 0 (0%)  | 0 (0%)  |
| Vomiting                          | 33<br>(100%)     | 0 (0%)  | 0 (0%)       | 0 (0%)  | 0 (0%)       | 0 (0%)  | 16<br>(100%)     | 0 (0%)  | 0 (0%)       | 0 (0%)       | 0 (0%)  | 0 (0%)  |
| WBC decreased                     | 33<br>(100%)     | 0 (0%)  | 0 (0%)       | 0 (0%)  | 0 (0%)       | 0 (0%)  | 15<br>(93.75%)   | 0 (0%)  | 0 (0%)       | 1<br>(6.25%) | 0 (0%)  | 0 (0%)  |
| WBC increased                     | 31<br>(93.94%)   | 0 (0%)  | 2<br>(6.06%) | 0 (0%)  | 0 (0%)       | 0 (0%)  | 15<br>(93.75%)   | 0 (0%)  | 1<br>(6.25%) | 0 (0%)       | 0 (0%)  | 0 (0%)  |

**Table 9 : Occurrence of Max Grade Events Per Subject which are Unlikely Related to Treatment by Treatment**

| Event                                | Vaccine (N = 33) |         |              |         |         |         | Placebo (N = 16) |         |              |         |         |         |
|--------------------------------------|------------------|---------|--------------|---------|---------|---------|------------------|---------|--------------|---------|---------|---------|
|                                      | No Sx            | Grade 0 | Grade 1      | Grade 2 | Grade 3 | Grade 4 | No Sx            | Grade 0 | Grade 1      | Grade 2 | Grade 3 | Grade 4 |
| Abdominal cramps                     | 33<br>(100%)     | 0 (0%)  | 0 (0%)       | 0 (0%)  | 0 (0%)  | 0 (0%)  | 16<br>(100%)     | 0 (0%)  | 0 (0%)       | 0 (0%)  | 0 (0%)  | 0 (0%)  |
| Abdominal pain                       | 31<br>(93.94%)   | 0 (0%)  | 2<br>(6.06%) | 0 (0%)  | 0 (0%)  | 0 (0%)  | 16<br>(100%)     | 0 (0%)  | 0 (0%)       | 0 (0%)  | 0 (0%)  | 0 (0%)  |
| Absolute neutrophil count, decreased | 32<br>(96.97%)   | 0 (0%)  | 1<br>(3.03%) | 0 (0%)  | 0 (0%)  | 0 (0%)  | 16<br>(100%)     | 0 (0%)  | 0 (0%)       | 0 (0%)  | 0 (0%)  | 0 (0%)  |
| Acute sinusitis                      | 33<br>(100%)     | 0 (0%)  | 0 (0%)       | 0 (0%)  | 0 (0%)  | 0 (0%)  | 15<br>(93.75%)   | 0 (0%)  | 1<br>(6.25%) | 0 (0%)  | 0 (0%)  | 0 (0%)  |
| ALT increased                        | 33<br>(100%)     | 0 (0%)  | 0 (0%)       | 0 (0%)  | 0 (0%)  | 0 (0%)  | 16<br>(100%)     | 0 (0%)  | 0 (0%)       | 0 (0%)  | 0 (0%)  | 0 (0%)  |
| Anxiety                              | 33<br>(100%)     | 0 (0%)  | 0 (0%)       | 0 (0%)  | 0 (0%)  | 0 (0%)  | 16<br>(100%)     | 0 (0%)  | 0 (0%)       | 0 (0%)  | 0 (0%)  | 0 (0%)  |
| Arthralgia                           | 33<br>(100%)     | 0 (0%)  | 0 (0%)       | 0 (0%)  | 0 (0%)  | 0 (0%)  | 16<br>(100%)     | 0 (0%)  | 0 (0%)       | 0 (0%)  | 0 (0%)  | 0 (0%)  |
| AST increased                        | 33<br>(100%)     | 0 (0%)  | 0 (0%)       | 0 (0%)  | 0 (0%)  | 0 (0%)  | 16<br>(100%)     | 0 (0%)  | 0 (0%)       | 0 (0%)  | 0 (0%)  | 0 (0%)  |
| Bilirubin total high                 | 33<br>(100%)     | 0 (0%)  | 0 (0%)       | 0 (0%)  | 0 (0%)  | 0 (0%)  | 16<br>(100%)     | 0 (0%)  | 0 (0%)       | 0 (0%)  | 0 (0%)  | 0 (0%)  |
| Blood eosinophils increased          | 33<br>(100%)     | 0 (0%)  | 0 (0%)       | 0 (0%)  | 0 (0%)  | 0 (0%)  | 16<br>(100%)     | 0 (0%)  | 0 (0%)       | 0 (0%)  | 0 (0%)  | 0 (0%)  |
| Bradycardia                          | 33<br>(100%)     | 0 (0%)  | 0 (0%)       | 0 (0%)  | 0 (0%)  | 0 (0%)  | 16<br>(100%)     | 0 (0%)  | 0 (0%)       | 0 (0%)  | 0 (0%)  | 0 (0%)  |
| BUN increased                        | 32<br>(96.97%)   | 0 (0%)  | 1<br>(3.03%) | 0 (0%)  | 0 (0%)  | 0 (0%)  | 16<br>(100%)     | 0 (0%)  | 0 (0%)       | 0 (0%)  | 0 (0%)  | 0 (0%)  |
| Campylobacter                        | 33<br>(100%)     | 0 (0%)  | 0 (0%)       | 0 (0%)  | 0 (0%)  | 0 (0%)  | 16<br>(100%)     | 0 (0%)  | 0 (0%)       | 0 (0%)  | 0 (0%)  | 0 (0%)  |
| Candida vaginitis                    | 33<br>(100%)     | 0 (0%)  | 0 (0%)       | 0 (0%)  | 0 (0%)  | 0 (0%)  | 14<br>(87.5%)    | 0 (0%)  | 2<br>(12.5%) | 0 (0%)  | 0 (0%)  | 0 (0%)  |
| Chills                               | 33<br>(100%)     | 0 (0%)  | 0 (0%)       | 0 (0%)  | 0 (0%)  | 0 (0%)  | 15<br>(93.75%)   | 0 (0%)  | 1<br>(6.25%) | 0 (0%)  | 0 (0%)  | 0 (0%)  |
| Common cold                          | 32<br>(96.97%)   | 0 (0%)  | 1<br>(3.03%) | 0 (0%)  | 0 (0%)  | 0 (0%)  | 16<br>(100%)     | 0 (0%)  | 0 (0%)       | 0 (0%)  | 0 (0%)  | 0 (0%)  |
| Constipation                         | 33<br>(100%)     | 0 (0%)  | 0 (0%)       | 0 (0%)  | 0 (0%)  | 0 (0%)  | 16<br>(100%)     | 0 (0%)  | 0 (0%)       | 0 (0%)  | 0 (0%)  | 0 (0%)  |

| Event                     | Vaccine (N = 33) |         |                |              |              |              | Placebo (N = 16) |         |                |              |              |         |
|---------------------------|------------------|---------|----------------|--------------|--------------|--------------|------------------|---------|----------------|--------------|--------------|---------|
|                           | No Sx            | Grade 0 | Grade 1        | Grade 2      | Grade 3      | Grade 4      | No Sx            | Grade 0 | Grade 1        | Grade 2      | Grade 3      | Grade 4 |
| Coryza                    | 33<br>(100%)     | 0 (0%)  | 0 (0%)         | 0 (0%)       | 0 (0%)       | 0 (0%)       | 16<br>(100%)     | 0 (0%)  | 0 (0%)         | 0 (0%)       | 0 (0%)       | 0 (0%)  |
| CPK increased             | 31<br>(93.94%)   | 0 (0%)  | 0 (0%)         | 1<br>(3.03%) | 0 (0%)       | 1<br>(3.03%) | 15<br>(93.75%)   | 0 (0%)  | 0 (0%)         | 1<br>(6.25%) | 0 (0%)       | 0 (0%)  |
| Creatine kinase           | 33<br>(100%)     | 0 (0%)  | 0 (0%)         | 0 (0%)       | 0 (0%)       | 0 (0%)       | 15<br>(93.75%)   | 0 (0%)  | 0 (0%)         | 1<br>(6.25%) | 0 (0%)       | 0 (0%)  |
| Creatine kinase high      | 33<br>(100%)     | 0 (0%)  | 0 (0%)         | 0 (0%)       | 0 (0%)       | 0 (0%)       | 15<br>(93.75%)   | 0 (0%)  | 0 (0%)         | 0 (0%)       | 1<br>(6.25%) | 0 (0%)  |
| Creatinine increased      | 33<br>(100%)     | 0 (0%)  | 0 (0%)         | 0 (0%)       | 0 (0%)       | 0 (0%)       | 16<br>(100%)     | 0 (0%)  | 0 (0%)         | 0 (0%)       | 0 (0%)       | 0 (0%)  |
| Dermatitis                | 32<br>(96.97%)   | 0 (0%)  | 0 (0%)         | 0 (0%)       | 1<br>(3.03%) | 0 (0%)       | 16<br>(100%)     | 0 (0%)  | 0 (0%)         | 0 (0%)       | 0 (0%)       | 0 (0%)  |
| Diaphoresis               | 32<br>(96.97%)   | 0 (0%)  | 1<br>(3.03%)   | 0 (0%)       | 0 (0%)       | 0 (0%)       | 16<br>(100%)     | 0 (0%)  | 0 (0%)         | 0 (0%)       | 0 (0%)       | 0 (0%)  |
| Diarrhea                  | 33<br>(100%)     | 0 (0%)  | 0 (0%)         | 0 (0%)       | 0 (0%)       | 0 (0%)       | 16<br>(100%)     | 0 (0%)  | 0 (0%)         | 0 (0%)       | 0 (0%)       | 0 (0%)  |
| Difficulty sleeping       | 33<br>(100%)     | 0 (0%)  | 0 (0%)         | 0 (0%)       | 0 (0%)       | 0 (0%)       | 16<br>(100%)     | 0 (0%)  | 0 (0%)         | 0 (0%)       | 0 (0%)       | 0 (0%)  |
| Dry cough                 | 33<br>(100%)     | 0 (0%)  | 0 (0%)         | 0 (0%)       | 0 (0%)       | 0 (0%)       | 16<br>(100%)     | 0 (0%)  | 0 (0%)         | 0 (0%)       | 0 (0%)       | 0 (0%)  |
| Eczema                    | 33<br>(100%)     | 0 (0%)  | 0 (0%)         | 0 (0%)       | 0 (0%)       | 0 (0%)       | 16<br>(100%)     | 0 (0%)  | 0 (0%)         | 0 (0%)       | 0 (0%)       | 0 (0%)  |
| Elevated liver enzymes    | 33<br>(100%)     | 0 (0%)  | 0 (0%)         | 0 (0%)       | 0 (0%)       | 0 (0%)       | 16<br>(100%)     | 0 (0%)  | 0 (0%)         | 0 (0%)       | 0 (0%)       | 0 (0%)  |
| Elevated serum creatinine | 33<br>(100%)     | 0 (0%)  | 0 (0%)         | 0 (0%)       | 0 (0%)       | 0 (0%)       | 16<br>(100%)     | 0 (0%)  | 0 (0%)         | 0 (0%)       | 0 (0%)       | 0 (0%)  |
| Eosinophilia              | 33<br>(100%)     | 0 (0%)  | 0 (0%)         | 0 (0%)       | 0 (0%)       | 0 (0%)       | 16<br>(100%)     | 0 (0%)  | 0 (0%)         | 0 (0%)       | 0 (0%)       | 0 (0%)  |
| Erythema                  | 4<br>(12.12%)    | 0 (0%)  | 29<br>(87.88%) | 0 (0%)       | 0 (0%)       | 0 (0%)       | 1<br>(6.25%)     | 0 (0%)  | 15<br>(93.75%) | 0 (0%)       | 0 (0%)       | 0 (0%)  |
| Eyelid Styte              | 32<br>(96.97%)   | 0 (0%)  | 1<br>(3.03%)   | 0 (0%)       | 0 (0%)       | 0 (0%)       | 16<br>(100%)     | 0 (0%)  | 0 (0%)         | 0 (0%)       | 0 (0%)       | 0 (0%)  |
| Fatigue                   | 32<br>(96.97%)   | 0 (0%)  | 1<br>(3.03%)   | 0 (0%)       | 0 (0%)       | 0 (0%)       | 15<br>(93.75%)   | 0 (0%)  | 1<br>(6.25%)   | 0 (0%)       | 0 (0%)       | 0 (0%)  |

| Event                     | Vaccine (N = 33) |         |               |              |              |         | Placebo (N = 16) |         |              |              |              |         |
|---------------------------|------------------|---------|---------------|--------------|--------------|---------|------------------|---------|--------------|--------------|--------------|---------|
|                           | No Sx            | Grade 0 | Grade 1       | Grade 2      | Grade 3      | Grade 4 | No Sx            | Grade 0 | Grade 1      | Grade 2      | Grade 3      | Grade 4 |
| Fever                     | 33<br>(100%)     | 0 (0%)  | 0 (0%)        | 0 (0%)       | 0 (0%)       | 0 (0%)  | 16<br>(100%)     | 0 (0%)  | 0 (0%)       | 0 (0%)       | 0 (0%)       | 0 (0%)  |
| Feverish                  | 32<br>(96.97%)   | 0 (0%)  | 1<br>(3.03%)  | 0 (0%)       | 0 (0%)       | 0 (0%)  | 15<br>(93.75%)   | 0 (0%)  | 1<br>(6.25%) | 0 (0%)       | 0 (0%)       | 0 (0%)  |
| Gastritis                 | 33<br>(100%)     | 0 (0%)  | 0 (0%)        | 0 (0%)       | 0 (0%)       | 0 (0%)  | 16<br>(100%)     | 0 (0%)  | 0 (0%)       | 0 (0%)       | 0 (0%)       | 0 (0%)  |
| Headache                  | 32<br>(96.97%)   | 0 (0%)  | 1<br>(3.03%)  | 0 (0%)       | 0 (0%)       | 0 (0%)  | 14<br>(87.5%)    | 0 (0%)  | 2<br>(12.5%) | 0 (0%)       | 0 (0%)       | 0 (0%)  |
| Hematuria                 | 32<br>(96.97%)   | 0 (0%)  | 0 (0%)        | 0 (0%)       | 1<br>(3.03%) | 0 (0%)  | 14<br>(87.5%)    | 0 (0%)  | 0 (0%)       | 2<br>(12.5%) | 0 (0%)       | 0 (0%)  |
| Hemoglobin decreased      | 27<br>(81.82%)   | 0 (0%)  | 5<br>(15.15%) | 1<br>(3.03%) | 0 (0%)       | 0 (0%)  | 14<br>(87.5%)    | 0 (0%)  | 2<br>(12.5%) | 0 (0%)       | 0 (0%)       | 0 (0%)  |
| Hyperglycemia             | 33<br>(100%)     | 0 (0%)  | 0 (0%)        | 0 (0%)       | 0 (0%)       | 0 (0%)  | 16<br>(100%)     | 0 (0%)  | 0 (0%)       | 0 (0%)       | 0 (0%)       | 0 (0%)  |
| Hypernatremia             | 32<br>(96.97%)   | 0 (0%)  | 1<br>(3.03%)  | 0 (0%)       | 0 (0%)       | 0 (0%)  | 15<br>(93.75%)   | 0 (0%)  | 0 (0%)       | 1<br>(6.25%) | 0 (0%)       | 0 (0%)  |
| Hypertension              | 33<br>(100%)     | 0 (0%)  | 0 (0%)        | 0 (0%)       | 0 (0%)       | 0 (0%)  | 16<br>(100%)     | 0 (0%)  | 0 (0%)       | 0 (0%)       | 0 (0%)       | 0 (0%)  |
| Hypocalcemia              | 33<br>(100%)     | 0 (0%)  | 0 (0%)        | 0 (0%)       | 0 (0%)       | 0 (0%)  | 16<br>(100%)     | 0 (0%)  | 0 (0%)       | 0 (0%)       | 0 (0%)       | 0 (0%)  |
| Hypoglycemia              | 33<br>(100%)     | 0 (0%)  | 0 (0%)        | 0 (0%)       | 0 (0%)       | 0 (0%)  | 16<br>(100%)     | 0 (0%)  | 0 (0%)       | 0 (0%)       | 0 (0%)       | 0 (0%)  |
| Hypokalemia               | 31<br>(93.94%)   | 0 (0%)  | 1<br>(3.03%)  | 1<br>(3.03%) | 0 (0%)       | 0 (0%)  | 15<br>(93.75%)   | 0 (0%)  | 0 (0%)       | 0 (0%)       | 1<br>(6.25%) | 0 (0%)  |
| Hyponatremia              | 32<br>(96.97%)   | 0 (0%)  | 1<br>(3.03%)  | 0 (0%)       | 0 (0%)       | 0 (0%)  | 16<br>(100%)     | 0 (0%)  | 0 (0%)       | 0 (0%)       | 0 (0%)       | 0 (0%)  |
| Hypophosphatemia          | 33<br>(100%)     | 0 (0%)  | 0 (0%)        | 0 (0%)       | 0 (0%)       | 0 (0%)  | 15<br>(93.75%)   | 0 (0%)  | 1<br>(6.25%) | 0 (0%)       | 0 (0%)       | 0 (0%)  |
| Influenza                 | 32<br>(96.97%)   | 0 (0%)  | 0 (0%)        | 1<br>(3.03%) | 0 (0%)       | 0 (0%)  | 16<br>(100%)     | 0 (0%)  | 0 (0%)       | 0 (0%)       | 0 (0%)       | 0 (0%)  |
| Injection site erythema   | 33<br>(100%)     | 0 (0%)  | 0 (0%)        | 0 (0%)       | 0 (0%)       | 0 (0%)  | 16<br>(100%)     | 0 (0%)  | 0 (0%)       | 0 (0%)       | 0 (0%)       | 0 (0%)  |
| Injection site induration | 33<br>(100%)     | 0 (0%)  | 0 (0%)        | 0 (0%)       | 0 (0%)       | 0 (0%)  | 16<br>(100%)     | 0 (0%)  | 0 (0%)       | 0 (0%)       | 0 (0%)       | 0 (0%)  |



| Event                      | Vaccine (N = 33) |         |                |              |         |         | Placebo (N = 16) |         |                |         |         |         |
|----------------------------|------------------|---------|----------------|--------------|---------|---------|------------------|---------|----------------|---------|---------|---------|
|                            | No Sx            | Grade 0 | Grade 1        | Grade 2      | Grade 3 | Grade 4 | No Sx            | Grade 0 | Grade 1        | Grade 2 | Grade 3 | Grade 4 |
| Injection site itching     | 33<br>(100%)     | 0 (0%)  | 0 (0%)         | 0 (0%)       | 0 (0%)  | 0 (0%)  | 16<br>(100%)     | 0 (0%)  | 0 (0%)         | 0 (0%)  | 0 (0%)  | 0 (0%)  |
| Injection site pain        | 33<br>(100%)     | 0 (0%)  | 0 (0%)         | 0 (0%)       | 0 (0%)  | 0 (0%)  | 16<br>(100%)     | 0 (0%)  | 0 (0%)         | 0 (0%)  | 0 (0%)  | 0 (0%)  |
| Injection site pruritus    | 33<br>(100%)     | 0 (0%)  | 0 (0%)         | 0 (0%)       | 0 (0%)  | 0 (0%)  | 16<br>(100%)     | 0 (0%)  | 0 (0%)         | 0 (0%)  | 0 (0%)  | 0 (0%)  |
| Injection site swelling    | 33<br>(100%)     | 0 (0%)  | 0 (0%)         | 0 (0%)       | 0 (0%)  | 0 (0%)  | 16<br>(100%)     | 0 (0%)  | 0 (0%)         | 0 (0%)  | 0 (0%)  | 0 (0%)  |
| Injury                     | 33<br>(100%)     | 0 (0%)  | 0 (0%)         | 0 (0%)       | 0 (0%)  | 0 (0%)  | 16<br>(100%)     | 0 (0%)  | 0 (0%)         | 0 (0%)  | 0 (0%)  | 0 (0%)  |
| Insect bite                | 33<br>(100%)     | 0 (0%)  | 0 (0%)         | 0 (0%)       | 0 (0%)  | 0 (0%)  | 16<br>(100%)     | 0 (0%)  | 0 (0%)         | 0 (0%)  | 0 (0%)  | 0 (0%)  |
| Iron deficiency anemia     | 33<br>(100%)     | 0 (0%)  | 0 (0%)         | 0 (0%)       | 0 (0%)  | 0 (0%)  | 16<br>(100%)     | 0 (0%)  | 0 (0%)         | 0 (0%)  | 0 (0%)  | 0 (0%)  |
| Knee pain                  | 33<br>(100%)     | 0 (0%)  | 0 (0%)         | 0 (0%)       | 0 (0%)  | 0 (0%)  | 16<br>(100%)     | 0 (0%)  | 0 (0%)         | 0 (0%)  | 0 (0%)  | 0 (0%)  |
| Laryngitis                 | 33<br>(100%)     | 0 (0%)  | 0 (0%)         | 0 (0%)       | 0 (0%)  | 0 (0%)  | 16<br>(100%)     | 0 (0%)  | 0 (0%)         | 0 (0%)  | 0 (0%)  | 0 (0%)  |
| Local swelling             | 2<br>(6.06%)     | 0 (0%)  | 31<br>(93.94%) | 0 (0%)       | 0 (0%)  | 0 (0%)  | 1<br>(6.25%)     | 0 (0%)  | 15<br>(93.75%) | 0 (0%)  | 0 (0%)  | 0 (0%)  |
| Lymph node tenderness      | 33<br>(100%)     | 0 (0%)  | 0 (0%)         | 0 (0%)       | 0 (0%)  | 0 (0%)  | 16<br>(100%)     | 0 (0%)  | 0 (0%)         | 0 (0%)  | 0 (0%)  | 0 (0%)  |
| Lymphocyte count increased | 33<br>(100%)     | 0 (0%)  | 0 (0%)         | 0 (0%)       | 0 (0%)  | 0 (0%)  | 16<br>(100%)     | 0 (0%)  | 0 (0%)         | 0 (0%)  | 0 (0%)  | 0 (0%)  |
| Muscle ache                | 33<br>(100%)     | 0 (0%)  | 0 (0%)         | 0 (0%)       | 0 (0%)  | 0 (0%)  | 16<br>(100%)     | 0 (0%)  | 0 (0%)         | 0 (0%)  | 0 (0%)  | 0 (0%)  |
| Muscle strain              | 33<br>(100%)     | 0 (0%)  | 0 (0%)         | 0 (0%)       | 0 (0%)  | 0 (0%)  | 16<br>(100%)     | 0 (0%)  | 0 (0%)         | 0 (0%)  | 0 (0%)  | 0 (0%)  |
| Myalgia                    | 33<br>(100%)     | 0 (0%)  | 0 (0%)         | 0 (0%)       | 0 (0%)  | 0 (0%)  | 14<br>(87.5%)    | 0 (0%)  | 2<br>(12.5%)   | 0 (0%)  | 0 (0%)  | 0 (0%)  |
| Nasal congestion           | 31<br>(93.94%)   | 0 (0%)  | 2<br>(6.06%)   | 0 (0%)       | 0 (0%)  | 0 (0%)  | 16<br>(100%)     | 0 (0%)  | 0 (0%)         | 0 (0%)  | 0 (0%)  | 0 (0%)  |
| Nausea                     | 30<br>(90.91%)   | 0 (0%)  | 2<br>(6.06%)   | 1<br>(3.03%) | 0 (0%)  | 0 (0%)  | 16<br>(100%)     | 0 (0%)  | 0 (0%)         | 0 (0%)  | 0 (0%)  | 0 (0%)  |

| Event                             | Vaccine (N = 33) |         |              |              |              |         | Placebo (N = 16) |         |              |              |         |         |
|-----------------------------------|------------------|---------|--------------|--------------|--------------|---------|------------------|---------|--------------|--------------|---------|---------|
|                                   | No Sx            | Grade 0 | Grade 1      | Grade 2      | Grade 3      | Grade 4 | No Sx            | Grade 0 | Grade 1      | Grade 2      | Grade 3 | Grade 4 |
| Neutrophil count decreased        | 32<br>(96.97%)   | 0 (0%)  | 1<br>(3.03%) | 0 (0%)       | 0 (0%)       | 0 (0%)  | 15<br>(93.75%)   | 0 (0%)  | 0 (0%)       | 1<br>(6.25%) | 0 (0%)  | 0 (0%)  |
| Oral pain                         | 33<br>(100%)     | 0 (0%)  | 0 (0%)       | 0 (0%)       | 0 (0%)       | 0 (0%)  | 16<br>(100%)     | 0 (0%)  | 0 (0%)       | 0 (0%)       | 0 (0%)  | 0 (0%)  |
| Peripheral neuropathy             | 33<br>(100%)     | 0 (0%)  | 0 (0%)       | 0 (0%)       | 0 (0%)       | 0 (0%)  | 15<br>(93.75%)   | 0 (0%)  | 1<br>(6.25%) | 0 (0%)       | 0 (0%)  | 0 (0%)  |
| Productive cough                  | 33<br>(100%)     | 0 (0%)  | 0 (0%)       | 0 (0%)       | 0 (0%)       | 0 (0%)  | 16<br>(100%)     | 0 (0%)  | 0 (0%)       | 0 (0%)       | 0 (0%)  | 0 (0%)  |
| Pruritic rash                     | 30<br>(90.91%)   | 0 (0%)  | 1<br>(3.03%) | 1<br>(3.03%) | 1<br>(3.03%) | 0 (0%)  | 16<br>(100%)     | 0 (0%)  | 0 (0%)       | 0 (0%)       | 0 (0%)  | 0 (0%)  |
| Pruritus                          | 33<br>(100%)     | 0 (0%)  | 0 (0%)       | 0 (0%)       | 0 (0%)       | 0 (0%)  | 16<br>(100%)     | 0 (0%)  | 0 (0%)       | 0 (0%)       | 0 (0%)  | 0 (0%)  |
| Rash                              | 33<br>(100%)     | 0 (0%)  | 0 (0%)       | 0 (0%)       | 0 (0%)       | 0 (0%)  | 16<br>(100%)     | 0 (0%)  | 0 (0%)       | 0 (0%)       | 0 (0%)  | 0 (0%)  |
| Rhinorrhea                        | 32<br>(96.97%)   | 0 (0%)  | 1<br>(3.03%) | 0 (0%)       | 0 (0%)       | 0 (0%)  | 16<br>(100%)     | 0 (0%)  | 0 (0%)       | 0 (0%)       | 0 (0%)  | 0 (0%)  |
| Sinusitis                         | 33<br>(100%)     | 0 (0%)  | 0 (0%)       | 0 (0%)       | 0 (0%)       | 0 (0%)  | 16<br>(100%)     | 0 (0%)  | 0 (0%)       | 0 (0%)       | 0 (0%)  | 0 (0%)  |
| Skin hyperpigmentation            | 33<br>(100%)     | 0 (0%)  | 0 (0%)       | 0 (0%)       | 0 (0%)       | 0 (0%)  | 16<br>(100%)     | 0 (0%)  | 0 (0%)       | 0 (0%)       | 0 (0%)  | 0 (0%)  |
| Skin induration                   | 33<br>(100%)     | 0 (0%)  | 0 (0%)       | 0 (0%)       | 0 (0%)       | 0 (0%)  | 16<br>(100%)     | 0 (0%)  | 0 (0%)       | 0 (0%)       | 0 (0%)  | 0 (0%)  |
| Sore throat                       | 31<br>(93.94%)   | 0 (0%)  | 1<br>(3.03%) | 1<br>(3.03%) | 0 (0%)       | 0 (0%)  | 16<br>(100%)     | 0 (0%)  | 0 (0%)       | 0 (0%)       | 0 (0%)  | 0 (0%)  |
| Systolic hypertension             | 33<br>(100%)     | 0 (0%)  | 0 (0%)       | 0 (0%)       | 0 (0%)       | 0 (0%)  | 16<br>(100%)     | 0 (0%)  | 0 (0%)       | 0 (0%)       | 0 (0%)  | 0 (0%)  |
| Tenderness                        | 33<br>(100%)     | 0 (0%)  | 0 (0%)       | 0 (0%)       | 0 (0%)       | 0 (0%)  | 16<br>(100%)     | 0 (0%)  | 0 (0%)       | 0 (0%)       | 0 (0%)  | 0 (0%)  |
| Tooth extraction                  | 33<br>(100%)     | 0 (0%)  | 0 (0%)       | 0 (0%)       | 0 (0%)       | 0 (0%)  | 16<br>(100%)     | 0 (0%)  | 0 (0%)       | 0 (0%)       | 0 (0%)  | 0 (0%)  |
| Torn bicep tendon                 | 33<br>(100%)     | 0 (0%)  | 0 (0%)       | 0 (0%)       | 0 (0%)       | 0 (0%)  | 16<br>(100%)     | 0 (0%)  | 0 (0%)       | 0 (0%)       | 0 (0%)  | 0 (0%)  |
| Upper respiratory tract infection | 33<br>(100%)     | 0 (0%)  | 0 (0%)       | 0 (0%)       | 0 (0%)       | 0 (0%)  | 16<br>(100%)     | 0 (0%)  | 0 (0%)       | 0 (0%)       | 0 (0%)  | 0 (0%)  |

| Event                   | Vaccine (N = 33) |         |              |              |         |         | Placebo (N = 16) |         |              |         |              |         |
|-------------------------|------------------|---------|--------------|--------------|---------|---------|------------------|---------|--------------|---------|--------------|---------|
|                         | No Sx            | Grade 0 | Grade 1      | Grade 2      | Grade 3 | Grade 4 | No Sx            | Grade 0 | Grade 1      | Grade 2 | Grade 3      | Grade 4 |
| Urinary frequency       | 33<br>(100%)     | 0 (0%)  | 0 (0%)       | 0 (0%)       | 0 (0%)  | 0 (0%)  | 15<br>(93.75%)   | 0 (0%)  | 1<br>(6.25%) | 0 (0%)  | 0 (0%)       | 0 (0%)  |
| Urinary tract infection | 33<br>(100%)     | 0 (0%)  | 0 (0%)       | 0 (0%)       | 0 (0%)  | 0 (0%)  | 15<br>(93.75%)   | 0 (0%)  | 0 (0%)       | 0 (0%)  | 1<br>(6.25%) | 0 (0%)  |
| Urine WBC increased     | 33<br>(100%)     | 0 (0%)  | 0 (0%)       | 0 (0%)       | 0 (0%)  | 0 (0%)  | 16<br>(100%)     | 0 (0%)  | 0 (0%)       | 0 (0%)  | 0 (0%)       | 0 (0%)  |
| Urticaria               | 33<br>(100%)     | 0 (0%)  | 0 (0%)       | 0 (0%)       | 0 (0%)  | 0 (0%)  | 16<br>(100%)     | 0 (0%)  | 0 (0%)       | 0 (0%)  | 0 (0%)       | 0 (0%)  |
| Vertigo                 | 33<br>(100%)     | 0 (0%)  | 0 (0%)       | 0 (0%)       | 0 (0%)  | 0 (0%)  | 15<br>(93.75%)   | 0 (0%)  | 0 (0%)       | 0 (0%)  | 1<br>(6.25%) | 0 (0%)  |
| Vitamin D deficiency    | 33<br>(100%)     | 0 (0%)  | 0 (0%)       | 0 (0%)       | 0 (0%)  | 0 (0%)  | 16<br>(100%)     | 0 (0%)  | 0 (0%)       | 0 (0%)  | 0 (0%)       | 0 (0%)  |
| Vomiting                | 31<br>(93.94%)   | 0 (0%)  | 1<br>(3.03%) | 1<br>(3.03%) | 0 (0%)  | 0 (0%)  | 16<br>(100%)     | 0 (0%)  | 0 (0%)       | 0 (0%)  | 0 (0%)       | 0 (0%)  |
| WBC decreased           | 33<br>(100%)     | 0 (0%)  | 0 (0%)       | 0 (0%)       | 0 (0%)  | 0 (0%)  | 16<br>(100%)     | 0 (0%)  | 0 (0%)       | 0 (0%)  | 0 (0%)       | 0 (0%)  |
| WBC increased           | 30<br>(90.91%)   | 0 (0%)  | 3<br>(9.09%) | 0 (0%)       | 0 (0%)  | 0 (0%)  | 16<br>(100%)     | 0 (0%)  | 0 (0%)       | 0 (0%)  | 0 (0%)       | 0 (0%)  |

**Table 10 : Occurrence of Max Grade Events Per Subject which are Possibly Related to Treatment by Treatment Group**

| Event                                | Vaccine (N = 33) |         |              |         |         |         | Placebo (N = 16) |         |         |         |         |         |
|--------------------------------------|------------------|---------|--------------|---------|---------|---------|------------------|---------|---------|---------|---------|---------|
|                                      | No Sx            | Grade 0 | Grade 1      | Grade 2 | Grade 3 | Grade 4 | No Sx            | Grade 0 | Grade 1 | Grade 2 | Grade 3 | Grade 4 |
| Abdominal cramps                     | 33<br>(100%)     | 0 (0%)  | 0 (0%)       | 0 (0%)  | 0 (0%)  | 0 (0%)  | 16<br>(100%)     | 0 (0%)  | 0 (0%)  | 0 (0%)  | 0 (0%)  | 0 (0%)  |
| Abdominal pain                       | 30<br>(90.91%)   | 0 (0%)  | 3<br>(9.09%) | 0 (0%)  | 0 (0%)  | 0 (0%)  | 16<br>(100%)     | 0 (0%)  | 0 (0%)  | 0 (0%)  | 0 (0%)  | 0 (0%)  |
| Absolute neutrophil count, decreased | 33<br>(100%)     | 0 (0%)  | 0 (0%)       | 0 (0%)  | 0 (0%)  | 0 (0%)  | 16<br>(100%)     | 0 (0%)  | 0 (0%)  | 0 (0%)  | 0 (0%)  | 0 (0%)  |
| Acute sinusitis                      | 33<br>(100%)     | 0 (0%)  | 0 (0%)       | 0 (0%)  | 0 (0%)  | 0 (0%)  | 16<br>(100%)     | 0 (0%)  | 0 (0%)  | 0 (0%)  | 0 (0%)  | 0 (0%)  |
| ALT increased                        | 32<br>(96.97%)   | 0 (0%)  | 1<br>(3.03%) | 0 (0%)  | 0 (0%)  | 0 (0%)  | 16<br>(100%)     | 0 (0%)  | 0 (0%)  | 0 (0%)  | 0 (0%)  | 0 (0%)  |

| Event                       | Vaccine (N = 33) |         |              |         |         |         | Placebo (N = 16) |         |              |         |         |         |
|-----------------------------|------------------|---------|--------------|---------|---------|---------|------------------|---------|--------------|---------|---------|---------|
|                             | No Sx            | Grade 0 | Grade 1      | Grade 2 | Grade 3 | Grade 4 | No Sx            | Grade 0 | Grade 1      | Grade 2 | Grade 3 | Grade 4 |
| Anxiety                     | 33<br>(100%)     | 0 (0%)  | 0 (0%)       | 0 (0%)  | 0 (0%)  | 0 (0%)  | 16<br>(100%)     | 0 (0%)  | 0 (0%)       | 0 (0%)  | 0 (0%)  | 0 (0%)  |
| Arthralgia                  | 31<br>(93.94%)   | 0 (0%)  | 2<br>(6.06%) | 0 (0%)  | 0 (0%)  | 0 (0%)  | 16<br>(100%)     | 0 (0%)  | 0 (0%)       | 0 (0%)  | 0 (0%)  | 0 (0%)  |
| AST increased               | 33<br>(100%)     | 0 (0%)  | 0 (0%)       | 0 (0%)  | 0 (0%)  | 0 (0%)  | 16<br>(100%)     | 0 (0%)  | 0 (0%)       | 0 (0%)  | 0 (0%)  | 0 (0%)  |
| Bilirubin total high        | 33<br>(100%)     | 0 (0%)  | 0 (0%)       | 0 (0%)  | 0 (0%)  | 0 (0%)  | 16<br>(100%)     | 0 (0%)  | 0 (0%)       | 0 (0%)  | 0 (0%)  | 0 (0%)  |
| Blood eosinophils increased | 33<br>(100%)     | 0 (0%)  | 0 (0%)       | 0 (0%)  | 0 (0%)  | 0 (0%)  | 16<br>(100%)     | 0 (0%)  | 0 (0%)       | 0 (0%)  | 0 (0%)  | 0 (0%)  |
| Bradycardia                 | 33<br>(100%)     | 0 (0%)  | 0 (0%)       | 0 (0%)  | 0 (0%)  | 0 (0%)  | 16<br>(100%)     | 0 (0%)  | 0 (0%)       | 0 (0%)  | 0 (0%)  | 0 (0%)  |
| BUN increased               | 33<br>(100%)     | 0 (0%)  | 0 (0%)       | 0 (0%)  | 0 (0%)  | 0 (0%)  | 16<br>(100%)     | 0 (0%)  | 0 (0%)       | 0 (0%)  | 0 (0%)  | 0 (0%)  |
| Campylobacter               | 33<br>(100%)     | 0 (0%)  | 0 (0%)       | 0 (0%)  | 0 (0%)  | 0 (0%)  | 16<br>(100%)     | 0 (0%)  | 0 (0%)       | 0 (0%)  | 0 (0%)  | 0 (0%)  |
| Candida vaginitis           | 33<br>(100%)     | 0 (0%)  | 0 (0%)       | 0 (0%)  | 0 (0%)  | 0 (0%)  | 16<br>(100%)     | 0 (0%)  | 0 (0%)       | 0 (0%)  | 0 (0%)  | 0 (0%)  |
| Chills                      | 33<br>(100%)     | 0 (0%)  | 0 (0%)       | 0 (0%)  | 0 (0%)  | 0 (0%)  | 16<br>(100%)     | 0 (0%)  | 0 (0%)       | 0 (0%)  | 0 (0%)  | 0 (0%)  |
| Common cold                 | 33<br>(100%)     | 0 (0%)  | 0 (0%)       | 0 (0%)  | 0 (0%)  | 0 (0%)  | 15<br>(93.75%)   | 0 (0%)  | 1<br>(6.25%) | 0 (0%)  | 0 (0%)  | 0 (0%)  |
| Constipation                | 33<br>(100%)     | 0 (0%)  | 0 (0%)       | 0 (0%)  | 0 (0%)  | 0 (0%)  | 16<br>(100%)     | 0 (0%)  | 0 (0%)       | 0 (0%)  | 0 (0%)  | 0 (0%)  |
| Coryza                      | 33<br>(100%)     | 0 (0%)  | 0 (0%)       | 0 (0%)  | 0 (0%)  | 0 (0%)  | 16<br>(100%)     | 0 (0%)  | 0 (0%)       | 0 (0%)  | 0 (0%)  | 0 (0%)  |
| CPK increased               | 33<br>(100%)     | 0 (0%)  | 0 (0%)       | 0 (0%)  | 0 (0%)  | 0 (0%)  | 16<br>(100%)     | 0 (0%)  | 0 (0%)       | 0 (0%)  | 0 (0%)  | 0 (0%)  |
| Creatine kinase             | 33<br>(100%)     | 0 (0%)  | 0 (0%)       | 0 (0%)  | 0 (0%)  | 0 (0%)  | 16<br>(100%)     | 0 (0%)  | 0 (0%)       | 0 (0%)  | 0 (0%)  | 0 (0%)  |
| Creatine kinase high        | 33<br>(100%)     | 0 (0%)  | 0 (0%)       | 0 (0%)  | 0 (0%)  | 0 (0%)  | 16<br>(100%)     | 0 (0%)  | 0 (0%)       | 0 (0%)  | 0 (0%)  | 0 (0%)  |
| Creatinine increased        | 33<br>(100%)     | 0 (0%)  | 0 (0%)       | 0 (0%)  | 0 (0%)  | 0 (0%)  | 16<br>(100%)     | 0 (0%)  | 0 (0%)       | 0 (0%)  | 0 (0%)  | 0 (0%)  |

| Event                     | Vaccine (N = 33) |         |               |              |         |         | Placebo (N = 16) |         |              |         |         |         |
|---------------------------|------------------|---------|---------------|--------------|---------|---------|------------------|---------|--------------|---------|---------|---------|
|                           | No Sx            | Grade 0 | Grade 1       | Grade 2      | Grade 3 | Grade 4 | No Sx            | Grade 0 | Grade 1      | Grade 2 | Grade 3 | Grade 4 |
| Dermatitis                | 33<br>(100%)     | 0 (0%)  | 0 (0%)        | 0 (0%)       | 0 (0%)  | 0 (0%)  | 16<br>(100%)     | 0 (0%)  | 0 (0%)       | 0 (0%)  | 0 (0%)  | 0 (0%)  |
| Diaphoresis               | 32<br>(96.97%)   | 0 (0%)  | 1<br>(3.03%)  | 0 (0%)       | 0 (0%)  | 0 (0%)  | 15<br>(93.75%)   | 0 (0%)  | 1<br>(6.25%) | 0 (0%)  | 0 (0%)  | 0 (0%)  |
| Diarrhea                  | 32<br>(96.97%)   | 0 (0%)  | 1<br>(3.03%)  | 0 (0%)       | 0 (0%)  | 0 (0%)  | 16<br>(100%)     | 0 (0%)  | 0 (0%)       | 0 (0%)  | 0 (0%)  | 0 (0%)  |
| Difficulty sleeping       | 33<br>(100%)     | 0 (0%)  | 0 (0%)        | 0 (0%)       | 0 (0%)  | 0 (0%)  | 16<br>(100%)     | 0 (0%)  | 0 (0%)       | 0 (0%)  | 0 (0%)  | 0 (0%)  |
| Dry cough                 | 33<br>(100%)     | 0 (0%)  | 0 (0%)        | 0 (0%)       | 0 (0%)  | 0 (0%)  | 16<br>(100%)     | 0 (0%)  | 0 (0%)       | 0 (0%)  | 0 (0%)  | 0 (0%)  |
| Eczema                    | 33<br>(100%)     | 0 (0%)  | 0 (0%)        | 0 (0%)       | 0 (0%)  | 0 (0%)  | 16<br>(100%)     | 0 (0%)  | 0 (0%)       | 0 (0%)  | 0 (0%)  | 0 (0%)  |
| Elevated liver enzymes    | 32<br>(96.97%)   | 0 (0%)  | 1<br>(3.03%)  | 0 (0%)       | 0 (0%)  | 0 (0%)  | 16<br>(100%)     | 0 (0%)  | 0 (0%)       | 0 (0%)  | 0 (0%)  | 0 (0%)  |
| Elevated serum creatinine | 33<br>(100%)     | 0 (0%)  | 0 (0%)        | 0 (0%)       | 0 (0%)  | 0 (0%)  | 16<br>(100%)     | 0 (0%)  | 0 (0%)       | 0 (0%)  | 0 (0%)  | 0 (0%)  |
| Eosinophilia              | 32<br>(96.97%)   | 0 (0%)  | 1<br>(3.03%)  | 0 (0%)       | 0 (0%)  | 0 (0%)  | 16<br>(100%)     | 0 (0%)  | 0 (0%)       | 0 (0%)  | 0 (0%)  | 0 (0%)  |
| Erythema                  | 33<br>(100%)     | 0 (0%)  | 0 (0%)        | 0 (0%)       | 0 (0%)  | 0 (0%)  | 16<br>(100%)     | 0 (0%)  | 0 (0%)       | 0 (0%)  | 0 (0%)  | 0 (0%)  |
| Eyelid Stye               | 33<br>(100%)     | 0 (0%)  | 0 (0%)        | 0 (0%)       | 0 (0%)  | 0 (0%)  | 16<br>(100%)     | 0 (0%)  | 0 (0%)       | 0 (0%)  | 0 (0%)  | 0 (0%)  |
| Fatigue                   | 27<br>(81.82%)   | 0 (0%)  | 6<br>(18.18%) | 0 (0%)       | 0 (0%)  | 0 (0%)  | 16<br>(100%)     | 0 (0%)  | 0 (0%)       | 0 (0%)  | 0 (0%)  | 0 (0%)  |
| Fever                     | 33<br>(100%)     | 0 (0%)  | 0 (0%)        | 0 (0%)       | 0 (0%)  | 0 (0%)  | 15<br>(93.75%)   | 0 (0%)  | 1<br>(6.25%) | 0 (0%)  | 0 (0%)  | 0 (0%)  |
| Feverish                  | 32<br>(96.97%)   | 0 (0%)  | 1<br>(3.03%)  | 0 (0%)       | 0 (0%)  | 0 (0%)  | 16<br>(100%)     | 0 (0%)  | 0 (0%)       | 0 (0%)  | 0 (0%)  | 0 (0%)  |
| Gastritis                 | 33<br>(100%)     | 0 (0%)  | 0 (0%)        | 0 (0%)       | 0 (0%)  | 0 (0%)  | 16<br>(100%)     | 0 (0%)  | 0 (0%)       | 0 (0%)  | 0 (0%)  | 0 (0%)  |
| Headache                  | 24<br>(72.73%)   | 0 (0%)  | 6<br>(18.18%) | 3<br>(9.09%) | 0 (0%)  | 0 (0%)  | 14<br>(87.5%)    | 0 (0%)  | 2<br>(12.5%) | 0 (0%)  | 0 (0%)  | 0 (0%)  |
| Hematuria                 | 33<br>(100%)     | 0 (0%)  | 0 (0%)        | 0 (0%)       | 0 (0%)  | 0 (0%)  | 16<br>(100%)     | 0 (0%)  | 0 (0%)       | 0 (0%)  | 0 (0%)  | 0 (0%)  |

| Event                     | Vaccine (N = 33) |         |              |         |         |         | Placebo (N = 16) |         |         |         |         |         |
|---------------------------|------------------|---------|--------------|---------|---------|---------|------------------|---------|---------|---------|---------|---------|
|                           | No Sx            | Grade 0 | Grade 1      | Grade 2 | Grade 3 | Grade 4 | No Sx            | Grade 0 | Grade 1 | Grade 2 | Grade 3 | Grade 4 |
| Hemoglobin decreased      | 32<br>(96.97%)   | 0 (0%)  | 1<br>(3.03%) | 0 (0%)  | 0 (0%)  | 0 (0%)  | 16<br>(100%)     | 0 (0%)  | 0 (0%)  | 0 (0%)  | 0 (0%)  | 0 (0%)  |
| Hyperglycemia             | 33<br>(100%)     | 0 (0%)  | 0 (0%)       | 0 (0%)  | 0 (0%)  | 0 (0%)  | 16<br>(100%)     | 0 (0%)  | 0 (0%)  | 0 (0%)  | 0 (0%)  | 0 (0%)  |
| Hypernatremia             | 33<br>(100%)     | 0 (0%)  | 0 (0%)       | 0 (0%)  | 0 (0%)  | 0 (0%)  | 16<br>(100%)     | 0 (0%)  | 0 (0%)  | 0 (0%)  | 0 (0%)  | 0 (0%)  |
| Hypertension              | 33<br>(100%)     | 0 (0%)  | 0 (0%)       | 0 (0%)  | 0 (0%)  | 0 (0%)  | 16<br>(100%)     | 0 (0%)  | 0 (0%)  | 0 (0%)  | 0 (0%)  | 0 (0%)  |
| Hypocalcemia              | 33<br>(100%)     | 0 (0%)  | 0 (0%)       | 0 (0%)  | 0 (0%)  | 0 (0%)  | 16<br>(100%)     | 0 (0%)  | 0 (0%)  | 0 (0%)  | 0 (0%)  | 0 (0%)  |
| Hypoglycemia              | 33<br>(100%)     | 0 (0%)  | 0 (0%)       | 0 (0%)  | 0 (0%)  | 0 (0%)  | 16<br>(100%)     | 0 (0%)  | 0 (0%)  | 0 (0%)  | 0 (0%)  | 0 (0%)  |
| Hypokalemia               | 33<br>(100%)     | 0 (0%)  | 0 (0%)       | 0 (0%)  | 0 (0%)  | 0 (0%)  | 16<br>(100%)     | 0 (0%)  | 0 (0%)  | 0 (0%)  | 0 (0%)  | 0 (0%)  |
| Hyponatremia              | 33<br>(100%)     | 0 (0%)  | 0 (0%)       | 0 (0%)  | 0 (0%)  | 0 (0%)  | 16<br>(100%)     | 0 (0%)  | 0 (0%)  | 0 (0%)  | 0 (0%)  | 0 (0%)  |
| Hypophosphatemia          | 33<br>(100%)     | 0 (0%)  | 0 (0%)       | 0 (0%)  | 0 (0%)  | 0 (0%)  | 16<br>(100%)     | 0 (0%)  | 0 (0%)  | 0 (0%)  | 0 (0%)  | 0 (0%)  |
| Influenza                 | 33<br>(100%)     | 0 (0%)  | 0 (0%)       | 0 (0%)  | 0 (0%)  | 0 (0%)  | 16<br>(100%)     | 0 (0%)  | 0 (0%)  | 0 (0%)  | 0 (0%)  | 0 (0%)  |
| Injection site erythema   | 33<br>(100%)     | 0 (0%)  | 0 (0%)       | 0 (0%)  | 0 (0%)  | 0 (0%)  | 16<br>(100%)     | 0 (0%)  | 0 (0%)  | 0 (0%)  | 0 (0%)  | 0 (0%)  |
| Injection site induration | 33<br>(100%)     | 0 (0%)  | 0 (0%)       | 0 (0%)  | 0 (0%)  | 0 (0%)  | 16<br>(100%)     | 0 (0%)  | 0 (0%)  | 0 (0%)  | 0 (0%)  | 0 (0%)  |
| Injection site itching    | 33<br>(100%)     | 0 (0%)  | 0 (0%)       | 0 (0%)  | 0 (0%)  | 0 (0%)  | 16<br>(100%)     | 0 (0%)  | 0 (0%)  | 0 (0%)  | 0 (0%)  | 0 (0%)  |
| Injection site pain       | 33<br>(100%)     | 0 (0%)  | 0 (0%)       | 0 (0%)  | 0 (0%)  | 0 (0%)  | 16<br>(100%)     | 0 (0%)  | 0 (0%)  | 0 (0%)  | 0 (0%)  | 0 (0%)  |
| Injection site pruritus   | 33<br>(100%)     | 0 (0%)  | 0 (0%)       | 0 (0%)  | 0 (0%)  | 0 (0%)  | 16<br>(100%)     | 0 (0%)  | 0 (0%)  | 0 (0%)  | 0 (0%)  | 0 (0%)  |
| Injection site swelling   | 33<br>(100%)     | 0 (0%)  | 0 (0%)       | 0 (0%)  | 0 (0%)  | 0 (0%)  | 16<br>(100%)     | 0 (0%)  | 0 (0%)  | 0 (0%)  | 0 (0%)  | 0 (0%)  |
| Injury                    | 33<br>(100%)     | 0 (0%)  | 0 (0%)       | 0 (0%)  | 0 (0%)  | 0 (0%)  | 16<br>(100%)     | 0 (0%)  | 0 (0%)  | 0 (0%)  | 0 (0%)  | 0 (0%)  |

| Event                      | Vaccine (N = 33) |         |              |              |         |         | Placebo (N = 16) |         |              |         |         |         |
|----------------------------|------------------|---------|--------------|--------------|---------|---------|------------------|---------|--------------|---------|---------|---------|
|                            | No Sx            | Grade 0 | Grade 1      | Grade 2      | Grade 3 | Grade 4 | No Sx            | Grade 0 | Grade 1      | Grade 2 | Grade 3 | Grade 4 |
| Insect bite                | 33<br>(100%)     | 0 (0%)  | 0 (0%)       | 0 (0%)       | 0 (0%)  | 0 (0%)  | 16<br>(100%)     | 0 (0%)  | 0 (0%)       | 0 (0%)  | 0 (0%)  | 0 (0%)  |
| Iron deficiency anemia     | 33<br>(100%)     | 0 (0%)  | 0 (0%)       | 0 (0%)       | 0 (0%)  | 0 (0%)  | 16<br>(100%)     | 0 (0%)  | 0 (0%)       | 0 (0%)  | 0 (0%)  | 0 (0%)  |
| Knee pain                  | 33<br>(100%)     | 0 (0%)  | 0 (0%)       | 0 (0%)       | 0 (0%)  | 0 (0%)  | 16<br>(100%)     | 0 (0%)  | 0 (0%)       | 0 (0%)  | 0 (0%)  | 0 (0%)  |
| Laryngitis                 | 33<br>(100%)     | 0 (0%)  | 0 (0%)       | 0 (0%)       | 0 (0%)  | 0 (0%)  | 16<br>(100%)     | 0 (0%)  | 0 (0%)       | 0 (0%)  | 0 (0%)  | 0 (0%)  |
| Local swelling             | 33<br>(100%)     | 0 (0%)  | 0 (0%)       | 0 (0%)       | 0 (0%)  | 0 (0%)  | 16<br>(100%)     | 0 (0%)  | 0 (0%)       | 0 (0%)  | 0 (0%)  | 0 (0%)  |
| Lymph node tenderness      | 33<br>(100%)     | 0 (0%)  | 0 (0%)       | 0 (0%)       | 0 (0%)  | 0 (0%)  | 16<br>(100%)     | 0 (0%)  | 0 (0%)       | 0 (0%)  | 0 (0%)  | 0 (0%)  |
| Lymphocyte count increased | 33<br>(100%)     | 0 (0%)  | 0 (0%)       | 0 (0%)       | 0 (0%)  | 0 (0%)  | 16<br>(100%)     | 0 (0%)  | 0 (0%)       | 0 (0%)  | 0 (0%)  | 0 (0%)  |
| Muscle ache                | 33<br>(100%)     | 0 (0%)  | 0 (0%)       | 0 (0%)       | 0 (0%)  | 0 (0%)  | 16<br>(100%)     | 0 (0%)  | 0 (0%)       | 0 (0%)  | 0 (0%)  | 0 (0%)  |
| Muscle strain              | 33<br>(100%)     | 0 (0%)  | 0 (0%)       | 0 (0%)       | 0 (0%)  | 0 (0%)  | 16<br>(100%)     | 0 (0%)  | 0 (0%)       | 0 (0%)  | 0 (0%)  | 0 (0%)  |
| Myalgia                    | 31<br>(93.94%)   | 0 (0%)  | 1<br>(3.03%) | 1<br>(3.03%) | 0 (0%)  | 0 (0%)  | 16<br>(100%)     | 0 (0%)  | 0 (0%)       | 0 (0%)  | 0 (0%)  | 0 (0%)  |
| Nasal congestion           | 33<br>(100%)     | 0 (0%)  | 0 (0%)       | 0 (0%)       | 0 (0%)  | 0 (0%)  | 16<br>(100%)     | 0 (0%)  | 0 (0%)       | 0 (0%)  | 0 (0%)  | 0 (0%)  |
| Nausea                     | 31<br>(93.94%)   | 0 (0%)  | 2<br>(6.06%) | 0 (0%)       | 0 (0%)  | 0 (0%)  | 15<br>(93.75%)   | 0 (0%)  | 1<br>(6.25%) | 0 (0%)  | 0 (0%)  | 0 (0%)  |
| Neutrophil count decreased | 33<br>(100%)     | 0 (0%)  | 0 (0%)       | 0 (0%)       | 0 (0%)  | 0 (0%)  | 16<br>(100%)     | 0 (0%)  | 0 (0%)       | 0 (0%)  | 0 (0%)  | 0 (0%)  |
| Oral pain                  | 33<br>(100%)     | 0 (0%)  | 0 (0%)       | 0 (0%)       | 0 (0%)  | 0 (0%)  | 16<br>(100%)     | 0 (0%)  | 0 (0%)       | 0 (0%)  | 0 (0%)  | 0 (0%)  |
| Peripheral neuropathy      | 33<br>(100%)     | 0 (0%)  | 0 (0%)       | 0 (0%)       | 0 (0%)  | 0 (0%)  | 16<br>(100%)     | 0 (0%)  | 0 (0%)       | 0 (0%)  | 0 (0%)  | 0 (0%)  |
| Productive cough           | 33<br>(100%)     | 0 (0%)  | 0 (0%)       | 0 (0%)       | 0 (0%)  | 0 (0%)  | 16<br>(100%)     | 0 (0%)  | 0 (0%)       | 0 (0%)  | 0 (0%)  | 0 (0%)  |
| Pruritic rash              | 33<br>(100%)     | 0 (0%)  | 0 (0%)       | 0 (0%)       | 0 (0%)  | 0 (0%)  | 16<br>(100%)     | 0 (0%)  | 0 (0%)       | 0 (0%)  | 0 (0%)  | 0 (0%)  |

| Event                             | Vaccine (N = 33) |         |              |         |              |         | Placebo (N = 16) |         |              |         |         |         |
|-----------------------------------|------------------|---------|--------------|---------|--------------|---------|------------------|---------|--------------|---------|---------|---------|
|                                   | No Sx            | Grade 0 | Grade 1      | Grade 2 | Grade 3      | Grade 4 | No Sx            | Grade 0 | Grade 1      | Grade 2 | Grade 3 | Grade 4 |
| Pruritus                          | 33<br>(100%)     | 0 (0%)  | 0 (0%)       | 0 (0%)  | 0 (0%)       | 0 (0%)  | 16<br>(100%)     | 0 (0%)  | 0 (0%)       | 0 (0%)  | 0 (0%)  | 0 (0%)  |
| Rash                              | 33<br>(100%)     | 0 (0%)  | 0 (0%)       | 0 (0%)  | 0 (0%)       | 0 (0%)  | 14<br>(87.5%)    | 0 (0%)  | 2<br>(12.5%) | 0 (0%)  | 0 (0%)  | 0 (0%)  |
| Rhinorrhea                        | 33<br>(100%)     | 0 (0%)  | 0 (0%)       | 0 (0%)  | 0 (0%)       | 0 (0%)  | 16<br>(100%)     | 0 (0%)  | 0 (0%)       | 0 (0%)  | 0 (0%)  | 0 (0%)  |
| Sinusitis                         | 33<br>(100%)     | 0 (0%)  | 0 (0%)       | 0 (0%)  | 0 (0%)       | 0 (0%)  | 16<br>(100%)     | 0 (0%)  | 0 (0%)       | 0 (0%)  | 0 (0%)  | 0 (0%)  |
| Skin hyperpigmentation            | 32<br>(96.97%)   | 0 (0%)  | 1<br>(3.03%) | 0 (0%)  | 0 (0%)       | 0 (0%)  | 16<br>(100%)     | 0 (0%)  | 0 (0%)       | 0 (0%)  | 0 (0%)  | 0 (0%)  |
| Skin induration                   | 33<br>(100%)     | 0 (0%)  | 0 (0%)       | 0 (0%)  | 0 (0%)       | 0 (0%)  | 16<br>(100%)     | 0 (0%)  | 0 (0%)       | 0 (0%)  | 0 (0%)  | 0 (0%)  |
| Sore throat                       | 33<br>(100%)     | 0 (0%)  | 0 (0%)       | 0 (0%)  | 0 (0%)       | 0 (0%)  | 16<br>(100%)     | 0 (0%)  | 0 (0%)       | 0 (0%)  | 0 (0%)  | 0 (0%)  |
| Systolic hypertension             | 33<br>(100%)     | 0 (0%)  | 0 (0%)       | 0 (0%)  | 0 (0%)       | 0 (0%)  | 16<br>(100%)     | 0 (0%)  | 0 (0%)       | 0 (0%)  | 0 (0%)  | 0 (0%)  |
| Tenderness                        | 33<br>(100%)     | 0 (0%)  | 0 (0%)       | 0 (0%)  | 0 (0%)       | 0 (0%)  | 16<br>(100%)     | 0 (0%)  | 0 (0%)       | 0 (0%)  | 0 (0%)  | 0 (0%)  |
| Tooth extraction                  | 33<br>(100%)     | 0 (0%)  | 0 (0%)       | 0 (0%)  | 0 (0%)       | 0 (0%)  | 16<br>(100%)     | 0 (0%)  | 0 (0%)       | 0 (0%)  | 0 (0%)  | 0 (0%)  |
| Torn bicep tendon                 | 33<br>(100%)     | 0 (0%)  | 0 (0%)       | 0 (0%)  | 0 (0%)       | 0 (0%)  | 16<br>(100%)     | 0 (0%)  | 0 (0%)       | 0 (0%)  | 0 (0%)  | 0 (0%)  |
| Upper respiratory tract infection | 33<br>(100%)     | 0 (0%)  | 0 (0%)       | 0 (0%)  | 0 (0%)       | 0 (0%)  | 16<br>(100%)     | 0 (0%)  | 0 (0%)       | 0 (0%)  | 0 (0%)  | 0 (0%)  |
| Urinary frequency                 | 33<br>(100%)     | 0 (0%)  | 0 (0%)       | 0 (0%)  | 0 (0%)       | 0 (0%)  | 16<br>(100%)     | 0 (0%)  | 0 (0%)       | 0 (0%)  | 0 (0%)  | 0 (0%)  |
| Urinary tract infection           | 33<br>(100%)     | 0 (0%)  | 0 (0%)       | 0 (0%)  | 0 (0%)       | 0 (0%)  | 16<br>(100%)     | 0 (0%)  | 0 (0%)       | 0 (0%)  | 0 (0%)  | 0 (0%)  |
| Urine WBC increased               | 33<br>(100%)     | 0 (0%)  | 0 (0%)       | 0 (0%)  | 0 (0%)       | 0 (0%)  | 16<br>(100%)     | 0 (0%)  | 0 (0%)       | 0 (0%)  | 0 (0%)  | 0 (0%)  |
| Urticaria                         | 32<br>(96.97%)   | 0 (0%)  | 0 (0%)       | 0 (0%)  | 1<br>(3.03%) | 0 (0%)  | 16<br>(100%)     | 0 (0%)  | 0 (0%)       | 0 (0%)  | 0 (0%)  | 0 (0%)  |
| Vertigo                           | 33<br>(100%)     | 0 (0%)  | 0 (0%)       | 0 (0%)  | 0 (0%)       | 0 (0%)  | 16<br>(100%)     | 0 (0%)  | 0 (0%)       | 0 (0%)  | 0 (0%)  | 0 (0%)  |



| Event                | Vaccine (N = 33) |         |         |         |         |         | Placebo (N = 16) |         |              |         |         |         |
|----------------------|------------------|---------|---------|---------|---------|---------|------------------|---------|--------------|---------|---------|---------|
|                      | No Sx            | Grade 0 | Grade 1 | Grade 2 | Grade 3 | Grade 4 | No Sx            | Grade 0 | Grade 1      | Grade 2 | Grade 3 | Grade 4 |
| Vitamin D deficiency | 33<br>(100%)     | 0 (0%)  | 0 (0%)  | 0 (0%)  | 0 (0%)  | 0 (0%)  | 16<br>(100%)     | 0 (0%)  | 0 (0%)       | 0 (0%)  | 0 (0%)  | 0 (0%)  |
| Vomiting             | 33<br>(100%)     | 0 (0%)  | 0 (0%)  | 0 (0%)  | 0 (0%)  | 0 (0%)  | 16<br>(100%)     | 0 (0%)  | 0 (0%)       | 0 (0%)  | 0 (0%)  | 0 (0%)  |
| WBC decreased        | 33<br>(100%)     | 0 (0%)  | 0 (0%)  | 0 (0%)  | 0 (0%)  | 0 (0%)  | 15<br>(93.75%)   | 0 (0%)  | 1<br>(6.25%) | 0 (0%)  | 0 (0%)  | 0 (0%)  |
| WBC increased        | 33<br>(100%)     | 0 (0%)  | 0 (0%)  | 0 (0%)  | 0 (0%)  | 0 (0%)  | 16<br>(100%)     | 0 (0%)  | 0 (0%)       | 0 (0%)  | 0 (0%)  | 0 (0%)  |

**Table 11 : Occurrence of Max Grade Events Per Subject which are Probably Related to Treatment by Treatment Group**

| Event                                | Vaccine (N = 33) |         |         |              |         |         | Placebo (N = 16) |         |         |         |         |         |
|--------------------------------------|------------------|---------|---------|--------------|---------|---------|------------------|---------|---------|---------|---------|---------|
|                                      | No Sx            | Grade 0 | Grade 1 | Grade 2      | Grade 3 | Grade 4 | No Sx            | Grade 0 | Grade 1 | Grade 2 | Grade 3 | Grade 4 |
| Abdominal cramps                     | 33<br>(100%)     | 0 (0%)  | 0 (0%)  | 0 (0%)       | 0 (0%)  | 0 (0%)  | 16<br>(100%)     | 0 (0%)  | 0 (0%)  | 0 (0%)  | 0 (0%)  | 0 (0%)  |
| Abdominal pain                       | 33<br>(100%)     | 0 (0%)  | 0 (0%)  | 0 (0%)       | 0 (0%)  | 0 (0%)  | 16<br>(100%)     | 0 (0%)  | 0 (0%)  | 0 (0%)  | 0 (0%)  | 0 (0%)  |
| Absolute neutrophil count, decreased | 33<br>(100%)     | 0 (0%)  | 0 (0%)  | 0 (0%)       | 0 (0%)  | 0 (0%)  | 16<br>(100%)     | 0 (0%)  | 0 (0%)  | 0 (0%)  | 0 (0%)  | 0 (0%)  |
| Acute sinusitis                      | 33<br>(100%)     | 0 (0%)  | 0 (0%)  | 0 (0%)       | 0 (0%)  | 0 (0%)  | 16<br>(100%)     | 0 (0%)  | 0 (0%)  | 0 (0%)  | 0 (0%)  | 0 (0%)  |
| ALT increased                        | 33<br>(100%)     | 0 (0%)  | 0 (0%)  | 0 (0%)       | 0 (0%)  | 0 (0%)  | 16<br>(100%)     | 0 (0%)  | 0 (0%)  | 0 (0%)  | 0 (0%)  | 0 (0%)  |
| Anxiety                              | 33<br>(100%)     | 0 (0%)  | 0 (0%)  | 0 (0%)       | 0 (0%)  | 0 (0%)  | 16<br>(100%)     | 0 (0%)  | 0 (0%)  | 0 (0%)  | 0 (0%)  | 0 (0%)  |
| Arthralgia                           | 31<br>(93.94%)   | 0 (0%)  | 0 (0%)  | 2<br>(6.06%) | 0 (0%)  | 0 (0%)  | 16<br>(100%)     | 0 (0%)  | 0 (0%)  | 0 (0%)  | 0 (0%)  | 0 (0%)  |

| Event                       | Vaccine (N = 33) |         |              |              |         |         | Placebo (N = 16) |         |              |         |         |         |
|-----------------------------|------------------|---------|--------------|--------------|---------|---------|------------------|---------|--------------|---------|---------|---------|
|                             | No Sx            | Grade 0 | Grade 1      | Grade 2      | Grade 3 | Grade 4 | No Sx            | Grade 0 | Grade 1      | Grade 2 | Grade 3 | Grade 4 |
| AST increased               | 33<br>(100%)     | 0 (0%)  | 0 (0%)       | 0 (0%)       | 0 (0%)  | 0 (0%)  | 16<br>(100%)     | 0 (0%)  | 0 (0%)       | 0 (0%)  | 0 (0%)  | 0 (0%)  |
| Bilirubin total high        | 33<br>(100%)     | 0 (0%)  | 0 (0%)       | 0 (0%)       | 0 (0%)  | 0 (0%)  | 16<br>(100%)     | 0 (0%)  | 0 (0%)       | 0 (0%)  | 0 (0%)  | 0 (0%)  |
| Blood eosinophils increased | 33<br>(100%)     | 0 (0%)  | 0 (0%)       | 0 (0%)       | 0 (0%)  | 0 (0%)  | 16<br>(100%)     | 0 (0%)  | 0 (0%)       | 0 (0%)  | 0 (0%)  | 0 (0%)  |
| Bradycardia                 | 33<br>(100%)     | 0 (0%)  | 0 (0%)       | 0 (0%)       | 0 (0%)  | 0 (0%)  | 16<br>(100%)     | 0 (0%)  | 0 (0%)       | 0 (0%)  | 0 (0%)  | 0 (0%)  |
| BUN increased               | 33<br>(100%)     | 0 (0%)  | 0 (0%)       | 0 (0%)       | 0 (0%)  | 0 (0%)  | 16<br>(100%)     | 0 (0%)  | 0 (0%)       | 0 (0%)  | 0 (0%)  | 0 (0%)  |
| Campylobacter               | 33<br>(100%)     | 0 (0%)  | 0 (0%)       | 0 (0%)       | 0 (0%)  | 0 (0%)  | 16<br>(100%)     | 0 (0%)  | 0 (0%)       | 0 (0%)  | 0 (0%)  | 0 (0%)  |
| Candida vaginitis           | 33<br>(100%)     | 0 (0%)  | 0 (0%)       | 0 (0%)       | 0 (0%)  | 0 (0%)  | 16<br>(100%)     | 0 (0%)  | 0 (0%)       | 0 (0%)  | 0 (0%)  | 0 (0%)  |
| Chills                      | 29<br>(87.88%)   | 0 (0%)  | 1<br>(3.03%) | 3<br>(9.09%) | 0 (0%)  | 0 (0%)  | 16<br>(100%)     | 0 (0%)  | 0 (0%)       | 0 (0%)  | 0 (0%)  | 0 (0%)  |
| Common cold                 | 33<br>(100%)     | 0 (0%)  | 0 (0%)       | 0 (0%)       | 0 (0%)  | 0 (0%)  | 16<br>(100%)     | 0 (0%)  | 0 (0%)       | 0 (0%)  | 0 (0%)  | 0 (0%)  |
| Constipation                | 33<br>(100%)     | 0 (0%)  | 0 (0%)       | 0 (0%)       | 0 (0%)  | 0 (0%)  | 16<br>(100%)     | 0 (0%)  | 0 (0%)       | 0 (0%)  | 0 (0%)  | 0 (0%)  |
| Coryza                      | 33<br>(100%)     | 0 (0%)  | 0 (0%)       | 0 (0%)       | 0 (0%)  | 0 (0%)  | 16<br>(100%)     | 0 (0%)  | 0 (0%)       | 0 (0%)  | 0 (0%)  | 0 (0%)  |
| CPK increased               | 33<br>(100%)     | 0 (0%)  | 0 (0%)       | 0 (0%)       | 0 (0%)  | 0 (0%)  | 16<br>(100%)     | 0 (0%)  | 0 (0%)       | 0 (0%)  | 0 (0%)  | 0 (0%)  |
| Creatine kinase             | 33<br>(100%)     | 0 (0%)  | 0 (0%)       | 0 (0%)       | 0 (0%)  | 0 (0%)  | 16<br>(100%)     | 0 (0%)  | 0 (0%)       | 0 (0%)  | 0 (0%)  | 0 (0%)  |
| Creatine kinase high        | 33<br>(100%)     | 0 (0%)  | 0 (0%)       | 0 (0%)       | 0 (0%)  | 0 (0%)  | 16<br>(100%)     | 0 (0%)  | 0 (0%)       | 0 (0%)  | 0 (0%)  | 0 (0%)  |
| Creatinine increased        | 33<br>(100%)     | 0 (0%)  | 0 (0%)       | 0 (0%)       | 0 (0%)  | 0 (0%)  | 16<br>(100%)     | 0 (0%)  | 0 (0%)       | 0 (0%)  | 0 (0%)  | 0 (0%)  |
| Dermatitis                  | 33<br>(100%)     | 0 (0%)  | 0 (0%)       | 0 (0%)       | 0 (0%)  | 0 (0%)  | 16<br>(100%)     | 0 (0%)  | 0 (0%)       | 0 (0%)  | 0 (0%)  | 0 (0%)  |
| Diaphoresis                 | 32<br>(96.97%)   | 0 (0%)  | 0 (0%)       | 1<br>(3.03%) | 0 (0%)  | 0 (0%)  | 15<br>(93.75%)   | 0 (0%)  | 1<br>(6.25%) | 0 (0%)  | 0 (0%)  | 0 (0%)  |

| Event                     | Vaccine (N = 33) |         |               |              |         |         | Placebo (N = 16) |         |              |              |         |         |
|---------------------------|------------------|---------|---------------|--------------|---------|---------|------------------|---------|--------------|--------------|---------|---------|
|                           | No Sx            | Grade 0 | Grade 1       | Grade 2      | Grade 3 | Grade 4 | No Sx            | Grade 0 | Grade 1      | Grade 2      | Grade 3 | Grade 4 |
| Diarrhea                  | 33<br>(100%)     | 0 (0%)  | 0 (0%)        | 0 (0%)       | 0 (0%)  | 0 (0%)  | 16<br>(100%)     | 0 (0%)  | 0 (0%)       | 0 (0%)       | 0 (0%)  | 0 (0%)  |
| Difficulty sleeping       | 33<br>(100%)     | 0 (0%)  | 0 (0%)        | 0 (0%)       | 0 (0%)  | 0 (0%)  | 16<br>(100%)     | 0 (0%)  | 0 (0%)       | 0 (0%)       | 0 (0%)  | 0 (0%)  |
| Dry cough                 | 33<br>(100%)     | 0 (0%)  | 0 (0%)        | 0 (0%)       | 0 (0%)  | 0 (0%)  | 16<br>(100%)     | 0 (0%)  | 0 (0%)       | 0 (0%)       | 0 (0%)  | 0 (0%)  |
| Eczema                    | 33<br>(100%)     | 0 (0%)  | 0 (0%)        | 0 (0%)       | 0 (0%)  | 0 (0%)  | 16<br>(100%)     | 0 (0%)  | 0 (0%)       | 0 (0%)       | 0 (0%)  | 0 (0%)  |
| Elevated liver enzymes    | 33<br>(100%)     | 0 (0%)  | 0 (0%)        | 0 (0%)       | 0 (0%)  | 0 (0%)  | 16<br>(100%)     | 0 (0%)  | 0 (0%)       | 0 (0%)       | 0 (0%)  | 0 (0%)  |
| Elevated serum creatinine | 33<br>(100%)     | 0 (0%)  | 0 (0%)        | 0 (0%)       | 0 (0%)  | 0 (0%)  | 16<br>(100%)     | 0 (0%)  | 0 (0%)       | 0 (0%)       | 0 (0%)  | 0 (0%)  |
| Eosinophilia              | 33<br>(100%)     | 0 (0%)  | 0 (0%)        | 0 (0%)       | 0 (0%)  | 0 (0%)  | 16<br>(100%)     | 0 (0%)  | 0 (0%)       | 0 (0%)       | 0 (0%)  | 0 (0%)  |
| Erythema                  | 32<br>(96.97%)   | 0 (0%)  | 0 (0%)        | 1<br>(3.03%) | 0 (0%)  | 0 (0%)  | 16<br>(100%)     | 0 (0%)  | 0 (0%)       | 0 (0%)       | 0 (0%)  | 0 (0%)  |
| Eyelid Styte              | 33<br>(100%)     | 0 (0%)  | 0 (0%)        | 0 (0%)       | 0 (0%)  | 0 (0%)  | 16<br>(100%)     | 0 (0%)  | 0 (0%)       | 0 (0%)       | 0 (0%)  | 0 (0%)  |
| Fatigue                   | 25<br>(75.76%)   | 0 (0%)  | 5<br>(15.15%) | 3<br>(9.09%) | 0 (0%)  | 0 (0%)  | 14<br>(87.5%)    | 0 (0%)  | 1<br>(6.25%) | 1<br>(6.25%) | 0 (0%)  | 0 (0%)  |
| Fever                     | 32<br>(96.97%)   | 0 (0%)  | 0 (0%)        | 1<br>(3.03%) | 0 (0%)  | 0 (0%)  | 15<br>(93.75%)   | 0 (0%)  | 1<br>(6.25%) | 0 (0%)       | 0 (0%)  | 0 (0%)  |
| Feverish                  | 27<br>(81.82%)   | 0 (0%)  | 3<br>(9.09%)  | 3<br>(9.09%) | 0 (0%)  | 0 (0%)  | 15<br>(93.75%)   | 0 (0%)  | 1<br>(6.25%) | 0 (0%)       | 0 (0%)  | 0 (0%)  |
| Gastritis                 | 33<br>(100%)     | 0 (0%)  | 0 (0%)        | 0 (0%)       | 0 (0%)  | 0 (0%)  | 16<br>(100%)     | 0 (0%)  | 0 (0%)       | 0 (0%)       | 0 (0%)  | 0 (0%)  |
| Headache                  | 28<br>(84.85%)   | 0 (0%)  | 3<br>(9.09%)  | 2<br>(6.06%) | 0 (0%)  | 0 (0%)  | 16<br>(100%)     | 0 (0%)  | 0 (0%)       | 0 (0%)       | 0 (0%)  | 0 (0%)  |
| Hematuria                 | 33<br>(100%)     | 0 (0%)  | 0 (0%)        | 0 (0%)       | 0 (0%)  | 0 (0%)  | 16<br>(100%)     | 0 (0%)  | 0 (0%)       | 0 (0%)       | 0 (0%)  | 0 (0%)  |
| Hemoglobin decreased      | 33<br>(100%)     | 0 (0%)  | 0 (0%)        | 0 (0%)       | 0 (0%)  | 0 (0%)  | 16<br>(100%)     | 0 (0%)  | 0 (0%)       | 0 (0%)       | 0 (0%)  | 0 (0%)  |
| Hyperglycemia             | 33<br>(100%)     | 0 (0%)  | 0 (0%)        | 0 (0%)       | 0 (0%)  | 0 (0%)  | 16<br>(100%)     | 0 (0%)  | 0 (0%)       | 0 (0%)       | 0 (0%)  | 0 (0%)  |

| Event                     | Vaccine (N = 33) |         |              |         |         |         | Placebo (N = 16) |         |         |         |         |         |
|---------------------------|------------------|---------|--------------|---------|---------|---------|------------------|---------|---------|---------|---------|---------|
|                           | No Sx            | Grade 0 | Grade 1      | Grade 2 | Grade 3 | Grade 4 | No Sx            | Grade 0 | Grade 1 | Grade 2 | Grade 3 | Grade 4 |
| Hypernatremia             | 33<br>(100%)     | 0 (0%)  | 0 (0%)       | 0 (0%)  | 0 (0%)  | 0 (0%)  | 16<br>(100%)     | 0 (0%)  | 0 (0%)  | 0 (0%)  | 0 (0%)  | 0 (0%)  |
| Hypertension              | 33<br>(100%)     | 0 (0%)  | 0 (0%)       | 0 (0%)  | 0 (0%)  | 0 (0%)  | 16<br>(100%)     | 0 (0%)  | 0 (0%)  | 0 (0%)  | 0 (0%)  | 0 (0%)  |
| Hypocalcemia              | 33<br>(100%)     | 0 (0%)  | 0 (0%)       | 0 (0%)  | 0 (0%)  | 0 (0%)  | 16<br>(100%)     | 0 (0%)  | 0 (0%)  | 0 (0%)  | 0 (0%)  | 0 (0%)  |
| Hypoglycemia              | 33<br>(100%)     | 0 (0%)  | 0 (0%)       | 0 (0%)  | 0 (0%)  | 0 (0%)  | 16<br>(100%)     | 0 (0%)  | 0 (0%)  | 0 (0%)  | 0 (0%)  | 0 (0%)  |
| Hypokalemia               | 33<br>(100%)     | 0 (0%)  | 0 (0%)       | 0 (0%)  | 0 (0%)  | 0 (0%)  | 16<br>(100%)     | 0 (0%)  | 0 (0%)  | 0 (0%)  | 0 (0%)  | 0 (0%)  |
| Hyponatremia              | 33<br>(100%)     | 0 (0%)  | 0 (0%)       | 0 (0%)  | 0 (0%)  | 0 (0%)  | 16<br>(100%)     | 0 (0%)  | 0 (0%)  | 0 (0%)  | 0 (0%)  | 0 (0%)  |
| Hypophosphatemia          | 33<br>(100%)     | 0 (0%)  | 0 (0%)       | 0 (0%)  | 0 (0%)  | 0 (0%)  | 16<br>(100%)     | 0 (0%)  | 0 (0%)  | 0 (0%)  | 0 (0%)  | 0 (0%)  |
| Influenza                 | 33<br>(100%)     | 0 (0%)  | 0 (0%)       | 0 (0%)  | 0 (0%)  | 0 (0%)  | 16<br>(100%)     | 0 (0%)  | 0 (0%)  | 0 (0%)  | 0 (0%)  | 0 (0%)  |
| Injection site erythema   | 33<br>(100%)     | 0 (0%)  | 0 (0%)       | 0 (0%)  | 0 (0%)  | 0 (0%)  | 16<br>(100%)     | 0 (0%)  | 0 (0%)  | 0 (0%)  | 0 (0%)  | 0 (0%)  |
| Injection site induration | 33<br>(100%)     | 0 (0%)  | 0 (0%)       | 0 (0%)  | 0 (0%)  | 0 (0%)  | 16<br>(100%)     | 0 (0%)  | 0 (0%)  | 0 (0%)  | 0 (0%)  | 0 (0%)  |
| Injection site itching    | 32<br>(96.97%)   | 0 (0%)  | 1<br>(3.03%) | 0 (0%)  | 0 (0%)  | 0 (0%)  | 16<br>(100%)     | 0 (0%)  | 0 (0%)  | 0 (0%)  | 0 (0%)  | 0 (0%)  |
| Injection site pain       | 33<br>(100%)     | 0 (0%)  | 0 (0%)       | 0 (0%)  | 0 (0%)  | 0 (0%)  | 16<br>(100%)     | 0 (0%)  | 0 (0%)  | 0 (0%)  | 0 (0%)  | 0 (0%)  |
| Injection site pruritus   | 33<br>(100%)     | 0 (0%)  | 0 (0%)       | 0 (0%)  | 0 (0%)  | 0 (0%)  | 16<br>(100%)     | 0 (0%)  | 0 (0%)  | 0 (0%)  | 0 (0%)  | 0 (0%)  |
| Injection site swelling   | 33<br>(100%)     | 0 (0%)  | 0 (0%)       | 0 (0%)  | 0 (0%)  | 0 (0%)  | 16<br>(100%)     | 0 (0%)  | 0 (0%)  | 0 (0%)  | 0 (0%)  | 0 (0%)  |
| Injury                    | 33<br>(100%)     | 0 (0%)  | 0 (0%)       | 0 (0%)  | 0 (0%)  | 0 (0%)  | 16<br>(100%)     | 0 (0%)  | 0 (0%)  | 0 (0%)  | 0 (0%)  | 0 (0%)  |
| Insect bite               | 33<br>(100%)     | 0 (0%)  | 0 (0%)       | 0 (0%)  | 0 (0%)  | 0 (0%)  | 16<br>(100%)     | 0 (0%)  | 0 (0%)  | 0 (0%)  | 0 (0%)  | 0 (0%)  |
| Iron deficiency anemia    | 33<br>(100%)     | 0 (0%)  | 0 (0%)       | 0 (0%)  | 0 (0%)  | 0 (0%)  | 16<br>(100%)     | 0 (0%)  | 0 (0%)  | 0 (0%)  | 0 (0%)  | 0 (0%)  |

| Event                      | Vaccine (N = 33) |         |               |              |         |         | Placebo (N = 16) |         |              |              |         |         |
|----------------------------|------------------|---------|---------------|--------------|---------|---------|------------------|---------|--------------|--------------|---------|---------|
|                            | No Sx            | Grade 0 | Grade 1       | Grade 2      | Grade 3 | Grade 4 | No Sx            | Grade 0 | Grade 1      | Grade 2      | Grade 3 | Grade 4 |
| Knee pain                  | 33<br>(100%)     | 0 (0%)  | 0 (0%)        | 0 (0%)       | 0 (0%)  | 0 (0%)  | 16<br>(100%)     | 0 (0%)  | 0 (0%)       | 0 (0%)       | 0 (0%)  | 0 (0%)  |
| Laryngitis                 | 33<br>(100%)     | 0 (0%)  | 0 (0%)        | 0 (0%)       | 0 (0%)  | 0 (0%)  | 16<br>(100%)     | 0 (0%)  | 0 (0%)       | 0 (0%)       | 0 (0%)  | 0 (0%)  |
| Local swelling             | 33<br>(100%)     | 0 (0%)  | 0 (0%)        | 0 (0%)       | 0 (0%)  | 0 (0%)  | 16<br>(100%)     | 0 (0%)  | 0 (0%)       | 0 (0%)       | 0 (0%)  | 0 (0%)  |
| Lymph node tenderness      | 33<br>(100%)     | 0 (0%)  | 0 (0%)        | 0 (0%)       | 0 (0%)  | 0 (0%)  | 16<br>(100%)     | 0 (0%)  | 0 (0%)       | 0 (0%)       | 0 (0%)  | 0 (0%)  |
| Lymphocyte count increased | 33<br>(100%)     | 0 (0%)  | 0 (0%)        | 0 (0%)       | 0 (0%)  | 0 (0%)  | 16<br>(100%)     | 0 (0%)  | 0 (0%)       | 0 (0%)       | 0 (0%)  | 0 (0%)  |
| Muscle ache                | 32<br>(96.97%)   | 0 (0%)  | 1<br>(3.03%)  | 0 (0%)       | 0 (0%)  | 0 (0%)  | 16<br>(100%)     | 0 (0%)  | 0 (0%)       | 0 (0%)       | 0 (0%)  | 0 (0%)  |
| Muscle strain              | 33<br>(100%)     | 0 (0%)  | 0 (0%)        | 0 (0%)       | 0 (0%)  | 0 (0%)  | 16<br>(100%)     | 0 (0%)  | 0 (0%)       | 0 (0%)       | 0 (0%)  | 0 (0%)  |
| Myalgia                    | 26<br>(78.79%)   | 0 (0%)  | 6<br>(18.18%) | 1<br>(3.03%) | 0 (0%)  | 0 (0%)  | 14<br>(87.5%)    | 0 (0%)  | 1<br>(6.25%) | 1<br>(6.25%) | 0 (0%)  | 0 (0%)  |
| Nasal congestion           | 33<br>(100%)     | 0 (0%)  | 0 (0%)        | 0 (0%)       | 0 (0%)  | 0 (0%)  | 16<br>(100%)     | 0 (0%)  | 0 (0%)       | 0 (0%)       | 0 (0%)  | 0 (0%)  |
| Nausea                     | 33<br>(100%)     | 0 (0%)  | 0 (0%)        | 0 (0%)       | 0 (0%)  | 0 (0%)  | 16<br>(100%)     | 0 (0%)  | 0 (0%)       | 0 (0%)       | 0 (0%)  | 0 (0%)  |
| Neutrophil count decreased | 33<br>(100%)     | 0 (0%)  | 0 (0%)        | 0 (0%)       | 0 (0%)  | 0 (0%)  | 16<br>(100%)     | 0 (0%)  | 0 (0%)       | 0 (0%)       | 0 (0%)  | 0 (0%)  |
| Oral pain                  | 33<br>(100%)     | 0 (0%)  | 0 (0%)        | 0 (0%)       | 0 (0%)  | 0 (0%)  | 16<br>(100%)     | 0 (0%)  | 0 (0%)       | 0 (0%)       | 0 (0%)  | 0 (0%)  |
| Peripheral neuropathy      | 33<br>(100%)     | 0 (0%)  | 0 (0%)        | 0 (0%)       | 0 (0%)  | 0 (0%)  | 16<br>(100%)     | 0 (0%)  | 0 (0%)       | 0 (0%)       | 0 (0%)  | 0 (0%)  |
| Productive cough           | 33<br>(100%)     | 0 (0%)  | 0 (0%)        | 0 (0%)       | 0 (0%)  | 0 (0%)  | 16<br>(100%)     | 0 (0%)  | 0 (0%)       | 0 (0%)       | 0 (0%)  | 0 (0%)  |
| Pruritic rash              | 33<br>(100%)     | 0 (0%)  | 0 (0%)        | 0 (0%)       | 0 (0%)  | 0 (0%)  | 16<br>(100%)     | 0 (0%)  | 0 (0%)       | 0 (0%)       | 0 (0%)  | 0 (0%)  |
| Pruritus                   | 33<br>(100%)     | 0 (0%)  | 0 (0%)        | 0 (0%)       | 0 (0%)  | 0 (0%)  | 16<br>(100%)     | 0 (0%)  | 0 (0%)       | 0 (0%)       | 0 (0%)  | 0 (0%)  |
| Rash                       | 33<br>(100%)     | 0 (0%)  | 0 (0%)        | 0 (0%)       | 0 (0%)  | 0 (0%)  | 16<br>(100%)     | 0 (0%)  | 0 (0%)       | 0 (0%)       | 0 (0%)  | 0 (0%)  |

| Event                             | Vaccine (N = 33) |         |              |         |         |         | Placebo (N = 16) |         |         |         |         |         |
|-----------------------------------|------------------|---------|--------------|---------|---------|---------|------------------|---------|---------|---------|---------|---------|
|                                   | No Sx            | Grade 0 | Grade 1      | Grade 2 | Grade 3 | Grade 4 | No Sx            | Grade 0 | Grade 1 | Grade 2 | Grade 3 | Grade 4 |
| Rhinorrhea                        | 33<br>(100%)     | 0 (0%)  | 0 (0%)       | 0 (0%)  | 0 (0%)  | 0 (0%)  | 16<br>(100%)     | 0 (0%)  | 0 (0%)  | 0 (0%)  | 0 (0%)  | 0 (0%)  |
| Sinusitis                         | 33<br>(100%)     | 0 (0%)  | 0 (0%)       | 0 (0%)  | 0 (0%)  | 0 (0%)  | 16<br>(100%)     | 0 (0%)  | 0 (0%)  | 0 (0%)  | 0 (0%)  | 0 (0%)  |
| Skin hyperpigmentation            | 32<br>(96.97%)   | 0 (0%)  | 1<br>(3.03%) | 0 (0%)  | 0 (0%)  | 0 (0%)  | 16<br>(100%)     | 0 (0%)  | 0 (0%)  | 0 (0%)  | 0 (0%)  | 0 (0%)  |
| Skin induration                   | 33<br>(100%)     | 0 (0%)  | 0 (0%)       | 0 (0%)  | 0 (0%)  | 0 (0%)  | 16<br>(100%)     | 0 (0%)  | 0 (0%)  | 0 (0%)  | 0 (0%)  | 0 (0%)  |
| Sore throat                       | 33<br>(100%)     | 0 (0%)  | 0 (0%)       | 0 (0%)  | 0 (0%)  | 0 (0%)  | 16<br>(100%)     | 0 (0%)  | 0 (0%)  | 0 (0%)  | 0 (0%)  | 0 (0%)  |
| Systolic hypertension             | 33<br>(100%)     | 0 (0%)  | 0 (0%)       | 0 (0%)  | 0 (0%)  | 0 (0%)  | 16<br>(100%)     | 0 (0%)  | 0 (0%)  | 0 (0%)  | 0 (0%)  | 0 (0%)  |
| Tenderness                        | 32<br>(96.97%)   | 0 (0%)  | 1<br>(3.03%) | 0 (0%)  | 0 (0%)  | 0 (0%)  | 16<br>(100%)     | 0 (0%)  | 0 (0%)  | 0 (0%)  | 0 (0%)  | 0 (0%)  |
| Tooth extraction                  | 33<br>(100%)     | 0 (0%)  | 0 (0%)       | 0 (0%)  | 0 (0%)  | 0 (0%)  | 16<br>(100%)     | 0 (0%)  | 0 (0%)  | 0 (0%)  | 0 (0%)  | 0 (0%)  |
| Torn bicep tendon                 | 33<br>(100%)     | 0 (0%)  | 0 (0%)       | 0 (0%)  | 0 (0%)  | 0 (0%)  | 16<br>(100%)     | 0 (0%)  | 0 (0%)  | 0 (0%)  | 0 (0%)  | 0 (0%)  |
| Upper respiratory tract infection | 33<br>(100%)     | 0 (0%)  | 0 (0%)       | 0 (0%)  | 0 (0%)  | 0 (0%)  | 16<br>(100%)     | 0 (0%)  | 0 (0%)  | 0 (0%)  | 0 (0%)  | 0 (0%)  |
| Urinary frequency                 | 33<br>(100%)     | 0 (0%)  | 0 (0%)       | 0 (0%)  | 0 (0%)  | 0 (0%)  | 16<br>(100%)     | 0 (0%)  | 0 (0%)  | 0 (0%)  | 0 (0%)  | 0 (0%)  |
| Urinary tract infection           | 33<br>(100%)     | 0 (0%)  | 0 (0%)       | 0 (0%)  | 0 (0%)  | 0 (0%)  | 16<br>(100%)     | 0 (0%)  | 0 (0%)  | 0 (0%)  | 0 (0%)  | 0 (0%)  |
| Urine WBC increased               | 33<br>(100%)     | 0 (0%)  | 0 (0%)       | 0 (0%)  | 0 (0%)  | 0 (0%)  | 16<br>(100%)     | 0 (0%)  | 0 (0%)  | 0 (0%)  | 0 (0%)  | 0 (0%)  |
| Urticaria                         | 33<br>(100%)     | 0 (0%)  | 0 (0%)       | 0 (0%)  | 0 (0%)  | 0 (0%)  | 16<br>(100%)     | 0 (0%)  | 0 (0%)  | 0 (0%)  | 0 (0%)  | 0 (0%)  |
| Vertigo                           | 33<br>(100%)     | 0 (0%)  | 0 (0%)       | 0 (0%)  | 0 (0%)  | 0 (0%)  | 16<br>(100%)     | 0 (0%)  | 0 (0%)  | 0 (0%)  | 0 (0%)  | 0 (0%)  |
| Vitamin D deficiency              | 33<br>(100%)     | 0 (0%)  | 0 (0%)       | 0 (0%)  | 0 (0%)  | 0 (0%)  | 16<br>(100%)     | 0 (0%)  | 0 (0%)  | 0 (0%)  | 0 (0%)  | 0 (0%)  |
| Vomiting                          | 33<br>(100%)     | 0 (0%)  | 0 (0%)       | 0 (0%)  | 0 (0%)  | 0 (0%)  | 16<br>(100%)     | 0 (0%)  | 0 (0%)  | 0 (0%)  | 0 (0%)  | 0 (0%)  |

| Event         | Vaccine (N = 33) |         |         |         |         |         | Placebo (N = 16) |         |         |         |         |         |
|---------------|------------------|---------|---------|---------|---------|---------|------------------|---------|---------|---------|---------|---------|
|               | No Sx            | Grade 0 | Grade 1 | Grade 2 | Grade 3 | Grade 4 | No Sx            | Grade 0 | Grade 1 | Grade 2 | Grade 3 | Grade 4 |
| WBC decreased | 33<br>(100%)     | 0 (0%)  | 0 (0%)  | 0 (0%)  | 0 (0%)  | 0 (0%)  | 16<br>(100%)     | 0 (0%)  | 0 (0%)  | 0 (0%)  | 0 (0%)  | 0 (0%)  |
| WBC increased | 33<br>(100%)     | 0 (0%)  | 0 (0%)  | 0 (0%)  | 0 (0%)  | 0 (0%)  | 16<br>(100%)     | 0 (0%)  | 0 (0%)  | 0 (0%)  | 0 (0%)  | 0 (0%)  |

**Table 12 : Occurrence of Max Grade Events Per Subject which are Definitely Related to Treatment by Treatment Group**

| Event                                | Vaccine (N = 33) |         |         |         |         |         | Placebo (N = 16) |         |         |         |         |         |
|--------------------------------------|------------------|---------|---------|---------|---------|---------|------------------|---------|---------|---------|---------|---------|
|                                      | No Sx            | Grade 0 | Grade 1 | Grade 2 | Grade 3 | Grade 4 | No Sx            | Grade 0 | Grade 1 | Grade 2 | Grade 3 | Grade 4 |
| Abdominal cramps                     | 33<br>(100%)     | 0 (0%)  | 0 (0%)  | 0 (0%)  | 0 (0%)  | 0 (0%)  | 16<br>(100%)     | 0 (0%)  | 0 (0%)  | 0 (0%)  | 0 (0%)  | 0 (0%)  |
| Abdominal pain                       | 33<br>(100%)     | 0 (0%)  | 0 (0%)  | 0 (0%)  | 0 (0%)  | 0 (0%)  | 16<br>(100%)     | 0 (0%)  | 0 (0%)  | 0 (0%)  | 0 (0%)  | 0 (0%)  |
| Absolute neutrophil count, decreased | 33<br>(100%)     | 0 (0%)  | 0 (0%)  | 0 (0%)  | 0 (0%)  | 0 (0%)  | 16<br>(100%)     | 0 (0%)  | 0 (0%)  | 0 (0%)  | 0 (0%)  | 0 (0%)  |
| Acute sinusitis                      | 33<br>(100%)     | 0 (0%)  | 0 (0%)  | 0 (0%)  | 0 (0%)  | 0 (0%)  | 16<br>(100%)     | 0 (0%)  | 0 (0%)  | 0 (0%)  | 0 (0%)  | 0 (0%)  |
| ALT increased                        | 33<br>(100%)     | 0 (0%)  | 0 (0%)  | 0 (0%)  | 0 (0%)  | 0 (0%)  | 16<br>(100%)     | 0 (0%)  | 0 (0%)  | 0 (0%)  | 0 (0%)  | 0 (0%)  |
| Anxiety                              | 33<br>(100%)     | 0 (0%)  | 0 (0%)  | 0 (0%)  | 0 (0%)  | 0 (0%)  | 16<br>(100%)     | 0 (0%)  | 0 (0%)  | 0 (0%)  | 0 (0%)  | 0 (0%)  |
| Arthralgia                           | 33<br>(100%)     | 0 (0%)  | 0 (0%)  | 0 (0%)  | 0 (0%)  | 0 (0%)  | 16<br>(100%)     | 0 (0%)  | 0 (0%)  | 0 (0%)  | 0 (0%)  | 0 (0%)  |
| AST increased                        | 33<br>(100%)     | 0 (0%)  | 0 (0%)  | 0 (0%)  | 0 (0%)  | 0 (0%)  | 16<br>(100%)     | 0 (0%)  | 0 (0%)  | 0 (0%)  | 0 (0%)  | 0 (0%)  |
| Bilirubin total high                 | 33<br>(100%)     | 0 (0%)  | 0 (0%)  | 0 (0%)  | 0 (0%)  | 0 (0%)  | 16<br>(100%)     | 0 (0%)  | 0 (0%)  | 0 (0%)  | 0 (0%)  | 0 (0%)  |
| Blood eosinophils increased          | 33<br>(100%)     | 0 (0%)  | 0 (0%)  | 0 (0%)  | 0 (0%)  | 0 (0%)  | 16<br>(100%)     | 0 (0%)  | 0 (0%)  | 0 (0%)  | 0 (0%)  | 0 (0%)  |
| Bradycardia                          | 33<br>(100%)     | 0 (0%)  | 0 (0%)  | 0 (0%)  | 0 (0%)  | 0 (0%)  | 16<br>(100%)     | 0 (0%)  | 0 (0%)  | 0 (0%)  | 0 (0%)  | 0 (0%)  |
| BUN increased                        | 33<br>(100%)     | 0 (0%)  | 0 (0%)  | 0 (0%)  | 0 (0%)  | 0 (0%)  | 16<br>(100%)     | 0 (0%)  | 0 (0%)  | 0 (0%)  | 0 (0%)  | 0 (0%)  |

| Event                  | Vaccine (N = 33) |         |         |         |         |         | Placebo (N = 16) |         |         |         |         |         |
|------------------------|------------------|---------|---------|---------|---------|---------|------------------|---------|---------|---------|---------|---------|
|                        | No Sx            | Grade 0 | Grade 1 | Grade 2 | Grade 3 | Grade 4 | No Sx            | Grade 0 | Grade 1 | Grade 2 | Grade 3 | Grade 4 |
| Campylobacter          | 33<br>(100%)     | 0 (0%)  | 0 (0%)  | 0 (0%)  | 0 (0%)  | 0 (0%)  | 16<br>(100%)     | 0 (0%)  | 0 (0%)  | 0 (0%)  | 0 (0%)  | 0 (0%)  |
| Candida vaginitis      | 33<br>(100%)     | 0 (0%)  | 0 (0%)  | 0 (0%)  | 0 (0%)  | 0 (0%)  | 16<br>(100%)     | 0 (0%)  | 0 (0%)  | 0 (0%)  | 0 (0%)  | 0 (0%)  |
| Chills                 | 33<br>(100%)     | 0 (0%)  | 0 (0%)  | 0 (0%)  | 0 (0%)  | 0 (0%)  | 16<br>(100%)     | 0 (0%)  | 0 (0%)  | 0 (0%)  | 0 (0%)  | 0 (0%)  |
| Common cold            | 33<br>(100%)     | 0 (0%)  | 0 (0%)  | 0 (0%)  | 0 (0%)  | 0 (0%)  | 16<br>(100%)     | 0 (0%)  | 0 (0%)  | 0 (0%)  | 0 (0%)  | 0 (0%)  |
| Constipation           | 33<br>(100%)     | 0 (0%)  | 0 (0%)  | 0 (0%)  | 0 (0%)  | 0 (0%)  | 16<br>(100%)     | 0 (0%)  | 0 (0%)  | 0 (0%)  | 0 (0%)  | 0 (0%)  |
| Coryza                 | 33<br>(100%)     | 0 (0%)  | 0 (0%)  | 0 (0%)  | 0 (0%)  | 0 (0%)  | 16<br>(100%)     | 0 (0%)  | 0 (0%)  | 0 (0%)  | 0 (0%)  | 0 (0%)  |
| CPK increased          | 33<br>(100%)     | 0 (0%)  | 0 (0%)  | 0 (0%)  | 0 (0%)  | 0 (0%)  | 16<br>(100%)     | 0 (0%)  | 0 (0%)  | 0 (0%)  | 0 (0%)  | 0 (0%)  |
| Creatine kinase        | 33<br>(100%)     | 0 (0%)  | 0 (0%)  | 0 (0%)  | 0 (0%)  | 0 (0%)  | 16<br>(100%)     | 0 (0%)  | 0 (0%)  | 0 (0%)  | 0 (0%)  | 0 (0%)  |
| Creatine kinase high   | 33<br>(100%)     | 0 (0%)  | 0 (0%)  | 0 (0%)  | 0 (0%)  | 0 (0%)  | 16<br>(100%)     | 0 (0%)  | 0 (0%)  | 0 (0%)  | 0 (0%)  | 0 (0%)  |
| Creatinine increased   | 33<br>(100%)     | 0 (0%)  | 0 (0%)  | 0 (0%)  | 0 (0%)  | 0 (0%)  | 16<br>(100%)     | 0 (0%)  | 0 (0%)  | 0 (0%)  | 0 (0%)  | 0 (0%)  |
| Dermatitis             | 33<br>(100%)     | 0 (0%)  | 0 (0%)  | 0 (0%)  | 0 (0%)  | 0 (0%)  | 16<br>(100%)     | 0 (0%)  | 0 (0%)  | 0 (0%)  | 0 (0%)  | 0 (0%)  |
| Diaphoresis            | 33<br>(100%)     | 0 (0%)  | 0 (0%)  | 0 (0%)  | 0 (0%)  | 0 (0%)  | 16<br>(100%)     | 0 (0%)  | 0 (0%)  | 0 (0%)  | 0 (0%)  | 0 (0%)  |
| Diarrhea               | 33<br>(100%)     | 0 (0%)  | 0 (0%)  | 0 (0%)  | 0 (0%)  | 0 (0%)  | 16<br>(100%)     | 0 (0%)  | 0 (0%)  | 0 (0%)  | 0 (0%)  | 0 (0%)  |
| Difficulty sleeping    | 33<br>(100%)     | 0 (0%)  | 0 (0%)  | 0 (0%)  | 0 (0%)  | 0 (0%)  | 16<br>(100%)     | 0 (0%)  | 0 (0%)  | 0 (0%)  | 0 (0%)  | 0 (0%)  |
| Dry cough              | 33<br>(100%)     | 0 (0%)  | 0 (0%)  | 0 (0%)  | 0 (0%)  | 0 (0%)  | 16<br>(100%)     | 0 (0%)  | 0 (0%)  | 0 (0%)  | 0 (0%)  | 0 (0%)  |
| Eczema                 | 33<br>(100%)     | 0 (0%)  | 0 (0%)  | 0 (0%)  | 0 (0%)  | 0 (0%)  | 16<br>(100%)     | 0 (0%)  | 0 (0%)  | 0 (0%)  | 0 (0%)  | 0 (0%)  |
| Elevated liver enzymes | 33<br>(100%)     | 0 (0%)  | 0 (0%)  | 0 (0%)  | 0 (0%)  | 0 (0%)  | 16<br>(100%)     | 0 (0%)  | 0 (0%)  | 0 (0%)  | 0 (0%)  | 0 (0%)  |



| Event                     | Vaccine (N = 33) |         |              |         |         |         | Placebo (N = 16) |         |         |         |         |         |
|---------------------------|------------------|---------|--------------|---------|---------|---------|------------------|---------|---------|---------|---------|---------|
|                           | No Sx            | Grade 0 | Grade 1      | Grade 2 | Grade 3 | Grade 4 | No Sx            | Grade 0 | Grade 1 | Grade 2 | Grade 3 | Grade 4 |
| Elevated serum creatinine | 33<br>(100%)     | 0 (0%)  | 0 (0%)       | 0 (0%)  | 0 (0%)  | 0 (0%)  | 16<br>(100%)     | 0 (0%)  | 0 (0%)  | 0 (0%)  | 0 (0%)  | 0 (0%)  |
| Eosinophilia              | 33<br>(100%)     | 0 (0%)  | 0 (0%)       | 0 (0%)  | 0 (0%)  | 0 (0%)  | 16<br>(100%)     | 0 (0%)  | 0 (0%)  | 0 (0%)  | 0 (0%)  | 0 (0%)  |
| Erythema                  | 32<br>(96.97%)   | 0 (0%)  | 1<br>(3.03%) | 0 (0%)  | 0 (0%)  | 0 (0%)  | 16<br>(100%)     | 0 (0%)  | 0 (0%)  | 0 (0%)  | 0 (0%)  | 0 (0%)  |
| Eyelid Stye               | 33<br>(100%)     | 0 (0%)  | 0 (0%)       | 0 (0%)  | 0 (0%)  | 0 (0%)  | 16<br>(100%)     | 0 (0%)  | 0 (0%)  | 0 (0%)  | 0 (0%)  | 0 (0%)  |
| Fatigue                   | 33<br>(100%)     | 0 (0%)  | 0 (0%)       | 0 (0%)  | 0 (0%)  | 0 (0%)  | 16<br>(100%)     | 0 (0%)  | 0 (0%)  | 0 (0%)  | 0 (0%)  | 0 (0%)  |
| Fever                     | 33<br>(100%)     | 0 (0%)  | 0 (0%)       | 0 (0%)  | 0 (0%)  | 0 (0%)  | 16<br>(100%)     | 0 (0%)  | 0 (0%)  | 0 (0%)  | 0 (0%)  | 0 (0%)  |
| Feverish                  | 33<br>(100%)     | 0 (0%)  | 0 (0%)       | 0 (0%)  | 0 (0%)  | 0 (0%)  | 16<br>(100%)     | 0 (0%)  | 0 (0%)  | 0 (0%)  | 0 (0%)  | 0 (0%)  |
| Gastritis                 | 33<br>(100%)     | 0 (0%)  | 0 (0%)       | 0 (0%)  | 0 (0%)  | 0 (0%)  | 16<br>(100%)     | 0 (0%)  | 0 (0%)  | 0 (0%)  | 0 (0%)  | 0 (0%)  |
| Headache                  | 33<br>(100%)     | 0 (0%)  | 0 (0%)       | 0 (0%)  | 0 (0%)  | 0 (0%)  | 16<br>(100%)     | 0 (0%)  | 0 (0%)  | 0 (0%)  | 0 (0%)  | 0 (0%)  |
| Hematuria                 | 33<br>(100%)     | 0 (0%)  | 0 (0%)       | 0 (0%)  | 0 (0%)  | 0 (0%)  | 16<br>(100%)     | 0 (0%)  | 0 (0%)  | 0 (0%)  | 0 (0%)  | 0 (0%)  |
| Hemoglobin decreased      | 33<br>(100%)     | 0 (0%)  | 0 (0%)       | 0 (0%)  | 0 (0%)  | 0 (0%)  | 16<br>(100%)     | 0 (0%)  | 0 (0%)  | 0 (0%)  | 0 (0%)  | 0 (0%)  |
| Hyperglycemia             | 33<br>(100%)     | 0 (0%)  | 0 (0%)       | 0 (0%)  | 0 (0%)  | 0 (0%)  | 16<br>(100%)     | 0 (0%)  | 0 (0%)  | 0 (0%)  | 0 (0%)  | 0 (0%)  |
| Hypnatremia               | 33<br>(100%)     | 0 (0%)  | 0 (0%)       | 0 (0%)  | 0 (0%)  | 0 (0%)  | 16<br>(100%)     | 0 (0%)  | 0 (0%)  | 0 (0%)  | 0 (0%)  | 0 (0%)  |
| Hypertension              | 33<br>(100%)     | 0 (0%)  | 0 (0%)       | 0 (0%)  | 0 (0%)  | 0 (0%)  | 16<br>(100%)     | 0 (0%)  | 0 (0%)  | 0 (0%)  | 0 (0%)  | 0 (0%)  |
| Hypocalcemia              | 33<br>(100%)     | 0 (0%)  | 0 (0%)       | 0 (0%)  | 0 (0%)  | 0 (0%)  | 16<br>(100%)     | 0 (0%)  | 0 (0%)  | 0 (0%)  | 0 (0%)  | 0 (0%)  |
| Hypoglycemia              | 33<br>(100%)     | 0 (0%)  | 0 (0%)       | 0 (0%)  | 0 (0%)  | 0 (0%)  | 16<br>(100%)     | 0 (0%)  | 0 (0%)  | 0 (0%)  | 0 (0%)  | 0 (0%)  |
| Hypokalemia               | 33<br>(100%)     | 0 (0%)  | 0 (0%)       | 0 (0%)  | 0 (0%)  | 0 (0%)  | 16<br>(100%)     | 0 (0%)  | 0 (0%)  | 0 (0%)  | 0 (0%)  | 0 (0%)  |

| Event                      | Vaccine (N = 33) |              |                |              |              |         | Placebo (N = 16) |              |               |              |         |         |
|----------------------------|------------------|--------------|----------------|--------------|--------------|---------|------------------|--------------|---------------|--------------|---------|---------|
|                            | No Sx            | Grade 0      | Grade 1        | Grade 2      | Grade 3      | Grade 4 | No Sx            | Grade 0      | Grade 1       | Grade 2      | Grade 3 | Grade 4 |
| Hyponatremia               | 33<br>(100%)     | 0 (0%)       | 0 (0%)         | 0 (0%)       | 0 (0%)       | 0 (0%)  | 16<br>(100%)     | 0 (0%)       | 0 (0%)        | 0 (0%)       | 0 (0%)  | 0 (0%)  |
| Hypophosphatemia           | 33<br>(100%)     | 0 (0%)       | 0 (0%)         | 0 (0%)       | 0 (0%)       | 0 (0%)  | 16<br>(100%)     | 0 (0%)       | 0 (0%)        | 0 (0%)       | 0 (0%)  | 0 (0%)  |
| Influenza                  | 33<br>(100%)     | 0 (0%)       | 0 (0%)         | 0 (0%)       | 0 (0%)       | 0 (0%)  | 16<br>(100%)     | 0 (0%)       | 0 (0%)        | 0 (0%)       | 0 (0%)  | 0 (0%)  |
| Injection site erythema    | 22<br>(66.67%)   | 3<br>(9.09%) | 4<br>(12.12%)  | 3<br>(9.09%) | 1<br>(3.03%) | 0 (0%)  | 14<br>(87.5%)    | 1<br>(6.25%) | 1<br>(6.25%)  | 0 (0%)       | 0 (0%)  | 0 (0%)  |
| Injection site induration  | 31<br>(93.94%)   | 1<br>(3.03%) | 1<br>(3.03%)   | 0 (0%)       | 0 (0%)       | 0 (0%)  | 16<br>(100%)     | 0 (0%)       | 0 (0%)        | 0 (0%)       | 0 (0%)  | 0 (0%)  |
| Injection site itching     | 26<br>(78.79%)   | 0 (0%)       | 6<br>(18.18%)  | 0 (0%)       | 1<br>(3.03%) | 0 (0%)  | 16<br>(100%)     | 0 (0%)       | 0 (0%)        | 0 (0%)       | 0 (0%)  | 0 (0%)  |
| Injection site pain        | 18<br>(54.55%)   | 0 (0%)       | 13<br>(39.39%) | 2<br>(6.06%) | 0 (0%)       | 0 (0%)  | 12 (75%)         | 0 (0%)       | 3<br>(18.75%) | 1<br>(6.25%) | 0 (0%)  | 0 (0%)  |
| Injection site pruritus    | 31<br>(93.94%)   | 0 (0%)       | 2<br>(6.06%)   | 0 (0%)       | 0 (0%)       | 0 (0%)  | 16<br>(100%)     | 0 (0%)       | 0 (0%)        | 0 (0%)       | 0 (0%)  | 0 (0%)  |
| Injection site swelling    | 22<br>(66.67%)   | 3<br>(9.09%) | 7<br>(21.21%)  | 1<br>(3.03%) | 0 (0%)       | 0 (0%)  | 15<br>(93.75%)   | 1<br>(6.25%) | 0 (0%)        | 0 (0%)       | 0 (0%)  | 0 (0%)  |
| Injury                     | 33<br>(100%)     | 0 (0%)       | 0 (0%)         | 0 (0%)       | 0 (0%)       | 0 (0%)  | 16<br>(100%)     | 0 (0%)       | 0 (0%)        | 0 (0%)       | 0 (0%)  | 0 (0%)  |
| Insect bite                | 33<br>(100%)     | 0 (0%)       | 0 (0%)         | 0 (0%)       | 0 (0%)       | 0 (0%)  | 16<br>(100%)     | 0 (0%)       | 0 (0%)        | 0 (0%)       | 0 (0%)  | 0 (0%)  |
| Iron deficiency anemia     | 33<br>(100%)     | 0 (0%)       | 0 (0%)         | 0 (0%)       | 0 (0%)       | 0 (0%)  | 16<br>(100%)     | 0 (0%)       | 0 (0%)        | 0 (0%)       | 0 (0%)  | 0 (0%)  |
| Knee pain                  | 33<br>(100%)     | 0 (0%)       | 0 (0%)         | 0 (0%)       | 0 (0%)       | 0 (0%)  | 16<br>(100%)     | 0 (0%)       | 0 (0%)        | 0 (0%)       | 0 (0%)  | 0 (0%)  |
| Laryngitis                 | 33<br>(100%)     | 0 (0%)       | 0 (0%)         | 0 (0%)       | 0 (0%)       | 0 (0%)  | 16<br>(100%)     | 0 (0%)       | 0 (0%)        | 0 (0%)       | 0 (0%)  | 0 (0%)  |
| Local swelling             | 33<br>(100%)     | 0 (0%)       | 0 (0%)         | 0 (0%)       | 0 (0%)       | 0 (0%)  | 16<br>(100%)     | 0 (0%)       | 0 (0%)        | 0 (0%)       | 0 (0%)  | 0 (0%)  |
| Lymph node tenderness      | 33<br>(100%)     | 0 (0%)       | 0 (0%)         | 0 (0%)       | 0 (0%)       | 0 (0%)  | 16<br>(100%)     | 0 (0%)       | 0 (0%)        | 0 (0%)       | 0 (0%)  | 0 (0%)  |
| Lymphocyte count increased | 33<br>(100%)     | 0 (0%)       | 0 (0%)         | 0 (0%)       | 0 (0%)       | 0 (0%)  | 16<br>(100%)     | 0 (0%)       | 0 (0%)        | 0 (0%)       | 0 (0%)  | 0 (0%)  |

| Event                      | Vaccine (N = 33) |         |              |         |         |         | Placebo (N = 16) |         |         |         |         |         |
|----------------------------|------------------|---------|--------------|---------|---------|---------|------------------|---------|---------|---------|---------|---------|
|                            | No Sx            | Grade 0 | Grade 1      | Grade 2 | Grade 3 | Grade 4 | No Sx            | Grade 0 | Grade 1 | Grade 2 | Grade 3 | Grade 4 |
| Muscle ache                | 32<br>(96.97%)   | 0 (0%)  | 1<br>(3.03%) | 0 (0%)  | 0 (0%)  | 0 (0%)  | 16<br>(100%)     | 0 (0%)  | 0 (0%)  | 0 (0%)  | 0 (0%)  | 0 (0%)  |
| Muscle strain              | 33<br>(100%)     | 0 (0%)  | 0 (0%)       | 0 (0%)  | 0 (0%)  | 0 (0%)  | 16<br>(100%)     | 0 (0%)  | 0 (0%)  | 0 (0%)  | 0 (0%)  | 0 (0%)  |
| Myalgia                    | 33<br>(100%)     | 0 (0%)  | 0 (0%)       | 0 (0%)  | 0 (0%)  | 0 (0%)  | 16<br>(100%)     | 0 (0%)  | 0 (0%)  | 0 (0%)  | 0 (0%)  | 0 (0%)  |
| Nasal congestion           | 33<br>(100%)     | 0 (0%)  | 0 (0%)       | 0 (0%)  | 0 (0%)  | 0 (0%)  | 16<br>(100%)     | 0 (0%)  | 0 (0%)  | 0 (0%)  | 0 (0%)  | 0 (0%)  |
| Nausea                     | 33<br>(100%)     | 0 (0%)  | 0 (0%)       | 0 (0%)  | 0 (0%)  | 0 (0%)  | 16<br>(100%)     | 0 (0%)  | 0 (0%)  | 0 (0%)  | 0 (0%)  | 0 (0%)  |
| Neutrophil count decreased | 33<br>(100%)     | 0 (0%)  | 0 (0%)       | 0 (0%)  | 0 (0%)  | 0 (0%)  | 16<br>(100%)     | 0 (0%)  | 0 (0%)  | 0 (0%)  | 0 (0%)  | 0 (0%)  |
| Oral pain                  | 33<br>(100%)     | 0 (0%)  | 0 (0%)       | 0 (0%)  | 0 (0%)  | 0 (0%)  | 16<br>(100%)     | 0 (0%)  | 0 (0%)  | 0 (0%)  | 0 (0%)  | 0 (0%)  |
| Peripheral neuropathy      | 33<br>(100%)     | 0 (0%)  | 0 (0%)       | 0 (0%)  | 0 (0%)  | 0 (0%)  | 16<br>(100%)     | 0 (0%)  | 0 (0%)  | 0 (0%)  | 0 (0%)  | 0 (0%)  |
| Productive cough           | 33<br>(100%)     | 0 (0%)  | 0 (0%)       | 0 (0%)  | 0 (0%)  | 0 (0%)  | 16<br>(100%)     | 0 (0%)  | 0 (0%)  | 0 (0%)  | 0 (0%)  | 0 (0%)  |
| Pruritic rash              | 33<br>(100%)     | 0 (0%)  | 0 (0%)       | 0 (0%)  | 0 (0%)  | 0 (0%)  | 16<br>(100%)     | 0 (0%)  | 0 (0%)  | 0 (0%)  | 0 (0%)  | 0 (0%)  |
| Pruritus                   | 32<br>(96.97%)   | 0 (0%)  | 1<br>(3.03%) | 0 (0%)  | 0 (0%)  | 0 (0%)  | 16<br>(100%)     | 0 (0%)  | 0 (0%)  | 0 (0%)  | 0 (0%)  | 0 (0%)  |
| Rash                       | 33<br>(100%)     | 0 (0%)  | 0 (0%)       | 0 (0%)  | 0 (0%)  | 0 (0%)  | 16<br>(100%)     | 0 (0%)  | 0 (0%)  | 0 (0%)  | 0 (0%)  | 0 (0%)  |
| Rhinorrhea                 | 33<br>(100%)     | 0 (0%)  | 0 (0%)       | 0 (0%)  | 0 (0%)  | 0 (0%)  | 16<br>(100%)     | 0 (0%)  | 0 (0%)  | 0 (0%)  | 0 (0%)  | 0 (0%)  |
| Sinusitis                  | 33<br>(100%)     | 0 (0%)  | 0 (0%)       | 0 (0%)  | 0 (0%)  | 0 (0%)  | 16<br>(100%)     | 0 (0%)  | 0 (0%)  | 0 (0%)  | 0 (0%)  | 0 (0%)  |
| Skin hyperpigmentation     | 32<br>(96.97%)   | 0 (0%)  | 1<br>(3.03%) | 0 (0%)  | 0 (0%)  | 0 (0%)  | 16<br>(100%)     | 0 (0%)  | 0 (0%)  | 0 (0%)  | 0 (0%)  | 0 (0%)  |
| Skin induration            | 32<br>(96.97%)   | 0 (0%)  | 1<br>(3.03%) | 0 (0%)  | 0 (0%)  | 0 (0%)  | 16<br>(100%)     | 0 (0%)  | 0 (0%)  | 0 (0%)  | 0 (0%)  | 0 (0%)  |
| Sore throat                | 33<br>(100%)     | 0 (0%)  | 0 (0%)       | 0 (0%)  | 0 (0%)  | 0 (0%)  | 16<br>(100%)     | 0 (0%)  | 0 (0%)  | 0 (0%)  | 0 (0%)  | 0 (0%)  |

| Event                             | Vaccine (N = 33) |         |         |         |         |         | Placebo (N = 16) |         |         |         |         |         |
|-----------------------------------|------------------|---------|---------|---------|---------|---------|------------------|---------|---------|---------|---------|---------|
|                                   | No Sx            | Grade 0 | Grade 1 | Grade 2 | Grade 3 | Grade 4 | No Sx            | Grade 0 | Grade 1 | Grade 2 | Grade 3 | Grade 4 |
| Systolic hypertension             | 33<br>(100%)     | 0 (0%)  | 0 (0%)  | 0 (0%)  | 0 (0%)  | 0 (0%)  | 16<br>(100%)     | 0 (0%)  | 0 (0%)  | 0 (0%)  | 0 (0%)  | 0 (0%)  |
| Tenderness                        | 33<br>(100%)     | 0 (0%)  | 0 (0%)  | 0 (0%)  | 0 (0%)  | 0 (0%)  | 16<br>(100%)     | 0 (0%)  | 0 (0%)  | 0 (0%)  | 0 (0%)  | 0 (0%)  |
| Tooth extraction                  | 33<br>(100%)     | 0 (0%)  | 0 (0%)  | 0 (0%)  | 0 (0%)  | 0 (0%)  | 16<br>(100%)     | 0 (0%)  | 0 (0%)  | 0 (0%)  | 0 (0%)  | 0 (0%)  |
| Torn bicep tendon                 | 33<br>(100%)     | 0 (0%)  | 0 (0%)  | 0 (0%)  | 0 (0%)  | 0 (0%)  | 16<br>(100%)     | 0 (0%)  | 0 (0%)  | 0 (0%)  | 0 (0%)  | 0 (0%)  |
| Upper respiratory tract infection | 33<br>(100%)     | 0 (0%)  | 0 (0%)  | 0 (0%)  | 0 (0%)  | 0 (0%)  | 16<br>(100%)     | 0 (0%)  | 0 (0%)  | 0 (0%)  | 0 (0%)  | 0 (0%)  |
| Urinary frequency                 | 33<br>(100%)     | 0 (0%)  | 0 (0%)  | 0 (0%)  | 0 (0%)  | 0 (0%)  | 16<br>(100%)     | 0 (0%)  | 0 (0%)  | 0 (0%)  | 0 (0%)  | 0 (0%)  |
| Urinary tract infection           | 33<br>(100%)     | 0 (0%)  | 0 (0%)  | 0 (0%)  | 0 (0%)  | 0 (0%)  | 16<br>(100%)     | 0 (0%)  | 0 (0%)  | 0 (0%)  | 0 (0%)  | 0 (0%)  |
| Urine WBC increased               | 33<br>(100%)     | 0 (0%)  | 0 (0%)  | 0 (0%)  | 0 (0%)  | 0 (0%)  | 16<br>(100%)     | 0 (0%)  | 0 (0%)  | 0 (0%)  | 0 (0%)  | 0 (0%)  |
| Urticaria                         | 33<br>(100%)     | 0 (0%)  | 0 (0%)  | 0 (0%)  | 0 (0%)  | 0 (0%)  | 16<br>(100%)     | 0 (0%)  | 0 (0%)  | 0 (0%)  | 0 (0%)  | 0 (0%)  |
| Vertigo                           | 33<br>(100%)     | 0 (0%)  | 0 (0%)  | 0 (0%)  | 0 (0%)  | 0 (0%)  | 16<br>(100%)     | 0 (0%)  | 0 (0%)  | 0 (0%)  | 0 (0%)  | 0 (0%)  |
| Vitamin D deficiency              | 33<br>(100%)     | 0 (0%)  | 0 (0%)  | 0 (0%)  | 0 (0%)  | 0 (0%)  | 16<br>(100%)     | 0 (0%)  | 0 (0%)  | 0 (0%)  | 0 (0%)  | 0 (0%)  |
| Vomiting                          | 33<br>(100%)     | 0 (0%)  | 0 (0%)  | 0 (0%)  | 0 (0%)  | 0 (0%)  | 16<br>(100%)     | 0 (0%)  | 0 (0%)  | 0 (0%)  | 0 (0%)  | 0 (0%)  |
| WBC decreased                     | 33<br>(100%)     | 0 (0%)  | 0 (0%)  | 0 (0%)  | 0 (0%)  | 0 (0%)  | 16<br>(100%)     | 0 (0%)  | 0 (0%)  | 0 (0%)  | 0 (0%)  | 0 (0%)  |
| WBC increased                     | 33<br>(100%)     | 0 (0%)  | 0 (0%)  | 0 (0%)  | 0 (0%)  | 0 (0%)  | 16<br>(100%)     | 0 (0%)  | 0 (0%)  | 0 (0%)  | 0 (0%)  | 0 (0%)  |

**Table 13 : Occurrence of “Worst” Relatedness to Treatment Per Subject by Treatment**

|                    | Vaccine (N = 33) | Placebo (N = 16) |
|--------------------|------------------|------------------|
| Definitely Related | 22 (66.67%)      | 4 (25%)          |
| Probably Related   | 1 (3.03%)        | 2 (12.5%)        |

|                  |            |            |
|------------------|------------|------------|
| Possibly Related | 4 (12.12%) | 2 (12.5%)  |
| Unlikely Related | 6 (18.18%) | 7 (43.75%) |
| Unrelated        | 0 (0%)     | 0 (0%)     |
| No AEs           | 0 (0%)     | 1 (6.25%)  |

**Table 14 : Number of Subjects with Event Per Group and One-Sided Fisher's Exact Test P-Values Comparing Vaccine to Placebo**

| Event                                | Vaccine: Adjuvant + AGS-V or AGS-V<br>(N = 33) | Placebo (N = 16) | Fisher's Exact P-value |
|--------------------------------------|------------------------------------------------|------------------|------------------------|
| Abdominal cramps                     | 1                                              | 0                | 0.67                   |
| Abdominal pain                       | 5                                              | 1                | 0.35                   |
| Absolute neutrophil count, decreased | 3                                              | 1                | 0.61                   |
| Acute sinusitis                      | 0                                              | 1                | 1                      |
| ALT increased                        | 3                                              | 0                | 0.3                    |
| Anxiety                              | 1                                              | 0                | 0.67                   |
| Arthralgia                           | 4                                              | 0                | 0.19                   |
| AST increased                        | 4                                              | 1                | 0.47                   |
| Bilirubin total high                 | 1                                              | 0                | 0.67                   |
| Blood eosinophils increased          | 1                                              | 0                | 0.67                   |
| Bradycardia                          | 2                                              | 0                | 0.45                   |
| BUN increased                        | 2                                              | 1                | 0.75                   |
| Campylobacter                        | 0                                              | 1                | 1                      |
| Candida vaginitis                    | 0                                              | 2                | 1                      |
| Chills                               | 5                                              | 1                | 0.35                   |
| Common cold                          | 1                                              | 1                | 0.9                    |
| Constipation                         | 0                                              | 1                | 1                      |
| Coryza                               | 2                                              | 1                | 0.75                   |
| CPK increased                        | 7                                              | 6                | 0.94                   |
| Creatine kinase                      | 0                                              | 1                | 1                      |

| <b>Event</b>              | <b>Vaccine: Adjuvant + AGS-V or AGS-V<br/>(N = 33)</b> | <b>Placebo (N = 16)</b> | <b>Fisher's Exact P-value</b> |
|---------------------------|--------------------------------------------------------|-------------------------|-------------------------------|
| Creatine kinase high      | 2                                                      | 1                       | 0.75                          |
| Creatinine increased      | 1                                                      | 0                       | 0.67                          |
| Dermatitis                | 1                                                      | 0                       | 0.67                          |
| Diaphoresis               | 4                                                      | 1                       | 0.47                          |
| Diarrhea                  | 2                                                      | 1                       | 0.75                          |
| Difficulty sleeping       | 1                                                      | 0                       | 0.67                          |
| Dry cough                 | 2                                                      | 0                       | 0.45                          |
| Eczema                    | 1                                                      | 0                       | 0.67                          |
| Elevated liver enzymes    | 1                                                      | 0                       | 0.67                          |
| Elevated serum creatinine | 1                                                      | 0                       | 0.67                          |
| Eosinophilia              | 1                                                      | 0                       | 0.67                          |
| Erythema                  | 30                                                     | 15                      | 0.81                          |
| Eyelid Stye               | 1                                                      | 0                       | 0.67                          |
| Fatigue                   | 13                                                     | 4                       | 0.25                          |
| Fever                     | 1                                                      | 2                       | 0.97                          |
| Feverish                  | 8                                                      | 3                       | 0.48                          |
| Gastritis                 | 0                                                      | 1                       | 1                             |
| Headache                  | 15                                                     | 4                       | 0.14                          |
| Hematuria                 | 4                                                      | 3                       | 0.85                          |
| Hemoglobin decreased      | 15                                                     | 5                       | 0.26                          |
| Hyperglycemia             | 3                                                      | 2                       | 0.81                          |
| Hypernatremia             | 7                                                      | 3                       | 0.58                          |
| Hypertension              | 1                                                      | 0                       | 0.67                          |
| Hypocalcemia              | 2                                                      | 0                       | 0.45                          |
| Hypoglycemia              | 5                                                      | 3                       | 0.77                          |
| Hypokalemia               | 4                                                      | 3                       | 0.85                          |

| <b>Event</b>               | <b>Vaccine: Adjuvant + AGS-V or AGS-V<br/>(N = 33)</b> | <b>Placebo (N = 16)</b> | <b>Fisher's Exact P-value</b> |
|----------------------------|--------------------------------------------------------|-------------------------|-------------------------------|
| Hyponatremia               | 1                                                      | 0                       | 0.67                          |
| Hypophosphatemia           | 5                                                      | 2                       | 0.59                          |
| Influenza                  | 1                                                      | 0                       | 0.67                          |
| Injection site erythema    | 11                                                     | 2                       | 0.11                          |
| Injection site induration  | 2                                                      | 0                       | 0.45                          |
| Injection site itching     | 8                                                      | 0                       | 0.03*                         |
| Injection site pain        | 15                                                     | 4                       | 0.14                          |
| Injection site pruritus    | 2                                                      | 0                       | 0.45                          |
| Injection site swelling    | 11                                                     | 1                       | 0.04*                         |
| Injury                     | 1                                                      | 0                       | 0.67                          |
| Insect bite                | 0                                                      | 1                       | 1                             |
| Iron deficiency anemia     | 1                                                      | 0                       | 0.67                          |
| Knee pain                  | 1                                                      | 0                       | 0.67                          |
| Laryngitis                 | 0                                                      | 1                       | 1                             |
| Local swelling             | 31                                                     | 15                      | 0.7                           |
| Lymph node tenderness      | 1                                                      | 0                       | 0.67                          |
| Lymphocyte count increased | 1                                                      | 0                       | 0.67                          |
| Muscle ache                | 2                                                      | 0                       | 0.45                          |
| Muscle strain              | 1                                                      | 0                       | 0.67                          |
| Myalgia                    | 8                                                      | 5                       | 0.81                          |
| Nasal congestion           | 3                                                      | 1                       | 0.61                          |
| Nausea                     | 5                                                      | 2                       | 0.59                          |
| Neutrophil count decreased | 5                                                      | 3                       | 0.77                          |
| Oral pain                  | 1                                                      | 0                       | 0.67                          |
| Peripheral neuropathy      | 0                                                      | 1                       | 1                             |
| Productive cough           | 1                                                      | 0                       | 0.67                          |

| <b>Event</b>                      | <b>Vaccine: Adjuvant + AGS-V or AGS-V<br/>(N = 33)</b> | <b>Placebo (N = 16)</b> | <b>Fisher's Exact P-value</b> |
|-----------------------------------|--------------------------------------------------------|-------------------------|-------------------------------|
| Pruritic rash                     | 3                                                      | 0                       | 0.3                           |
| Pruritus                          | 1                                                      | 0                       | 0.67                          |
| Rash                              | 0                                                      | 3                       | 1                             |
| Rhinorrhea                        | 1                                                      | 1                       | 0.9                           |
| Sinusitis                         | 1                                                      | 0                       | 0.67                          |
| Skin hyperpigmentation            | 2                                                      | 0                       | 0.45                          |
| Skin induration                   | 1                                                      | 0                       | 0.67                          |
| Sore throat                       | 3                                                      | 1                       | 0.61                          |
| Systolic hypertension             | 1                                                      | 0                       | 0.67                          |
| Tenderness                        | 1                                                      | 0                       | 0.67                          |
| Tooth extraction                  | 1                                                      | 0                       | 0.67                          |
| Torn bicep tendon                 | 1                                                      | 0                       | 0.67                          |
| Upper respiratory tract infection | 1                                                      | 0                       | 0.67                          |
| Urinary frequency                 | 0                                                      | 1                       | 1                             |
| Urinary tract infection           | 1                                                      | 1                       | 0.9                           |
| Urine WBC increased               | 2                                                      | 0                       | 0.45                          |
| Urticaria                         | 1                                                      | 0                       | 0.67                          |
| Vertigo                           | 0                                                      | 1                       | 1                             |
| Vitamin D deficiency              | 1                                                      | 0                       | 0.67                          |
| Vomiting                          | 2                                                      | 0                       | 0.45                          |
| WBC decreased                     | 0                                                      | 2                       | 1                             |
| WBC increased                     | 3                                                      | 1                       | 0.61                          |

\* Indicates one-sided Fisher's Exact p-value < 0.1







|                              |         |   |        |   |   |   |         |   |
|------------------------------|---------|---|--------|---|---|---|---------|---|
| Adjusted p-values            |         |   |        |   |   |   |         |   |
| AGS-v + Adjuvant vs. AGS-v   | 0.48    | 1 | 1      | 1 | 1 | 1 | 1       | 1 |
| AGS-v vs. Placebo            | 0.0072* | 1 | 1      | 1 | 1 | 1 | 0.36    | 1 |
| AGS-v + Adjuvant vs. Placebo | 0.0166* | 1 | 0.0518 | 1 | 1 | 1 | 0.0185* | 1 |

\*denotes significant between group differences at the .05 level

Supplementary Table 6. Mosquito survival and fecundity

| Mean (SD)                    | # Eggs          | # Pupae (out of 100 eggs) | # Adults (out of 100 eggs) | % Eggs Become Pupae | % Pupae Become Adults |
|------------------------------|-----------------|---------------------------|----------------------------|---------------------|-----------------------|
| AGS-V                        | 706 (123.75)    | 78.93 (13.08)             | 69.13 (14.07)              | 11.59 (3.26)        | 88.12 (12.8)          |
| AGS-V + Adjuvant             | 673.88 (221.29) | 79.62 (14.86)             | 75.25 (13.55)              | 15.56 (13.58)       | 94.96 (6.86)          |
| Placebo                      | 663 (165.51)    | 81.93 (9.08)              | 78.53 (9.52)               | 13.76 (6.49)        | 95.77 (2.88)          |
| Adjusted p-values            |                 |                           |                            |                     |                       |
| AGS-V + Adjuvant vs. AGS-V   | 1               | 1                         | 1                          | 1                   | 1                     |
| AGS-V vs. Placebo            | 1               | 1                         | 0.588                      | 1                   | 0.585                 |
| AGS-V + Adjuvant vs. Placebo | 1               | 1                         | 1                          | 1                   | 1                     |

Supplementary Figure 1. Vaccine-specific antibody IgG isotypes in 3 treatment groups

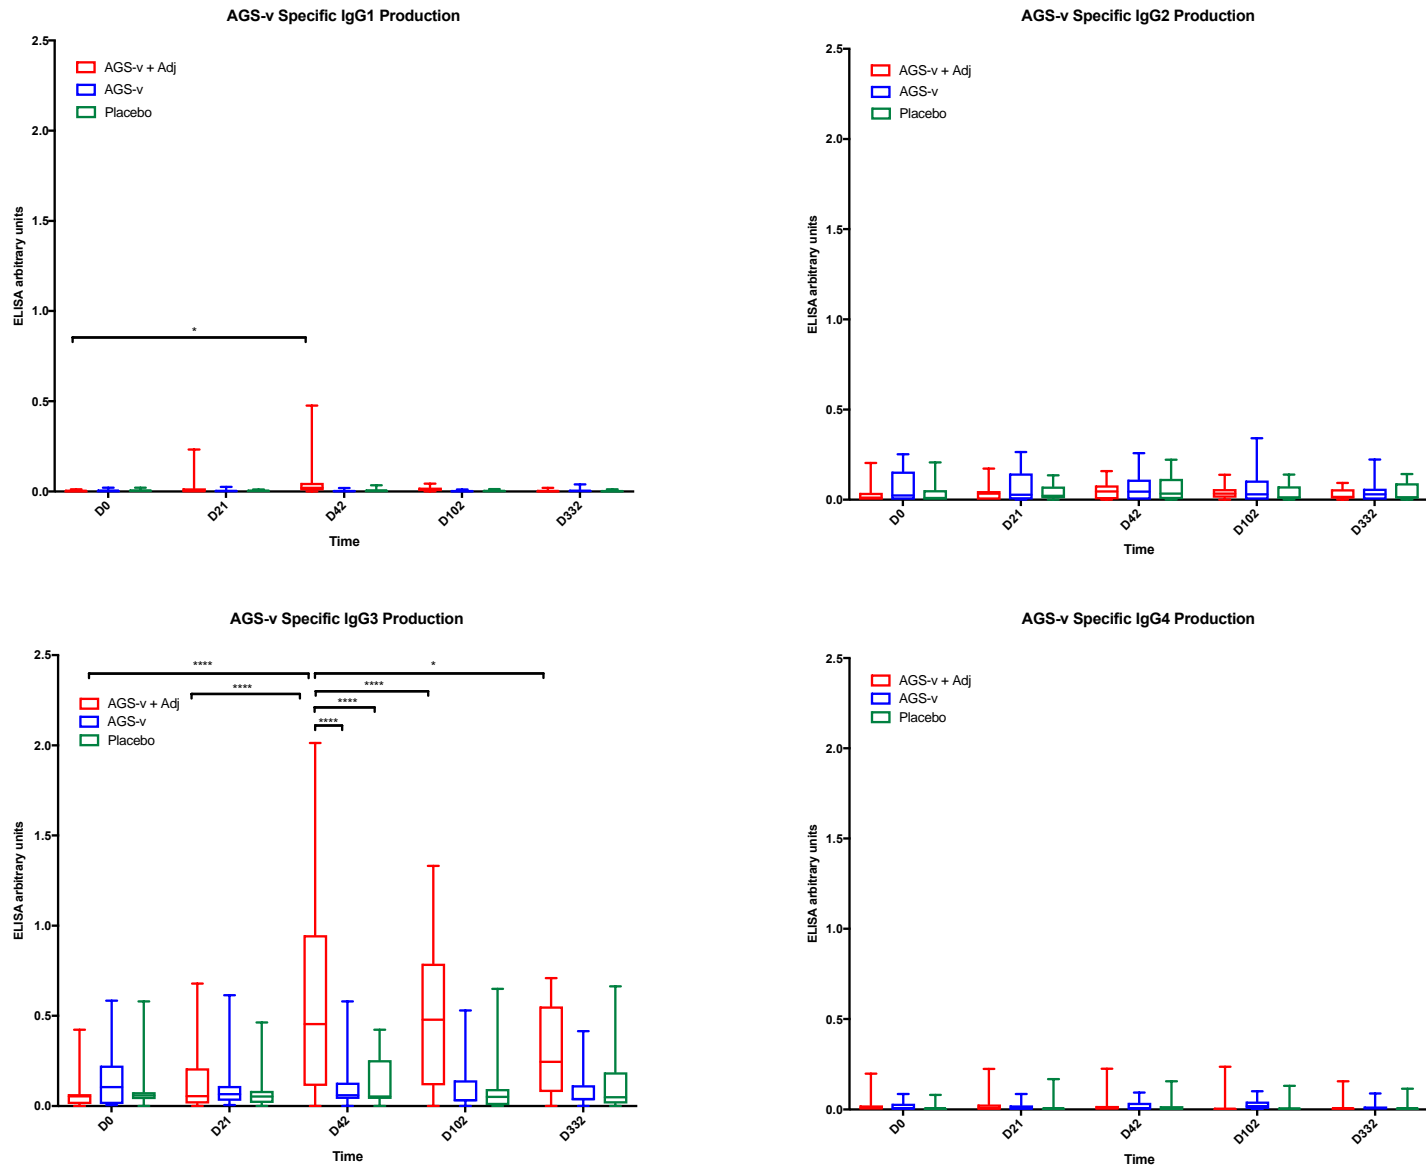

Supplementary Figure 2. Cellular response to vaccine peptides for remaining three cytokines

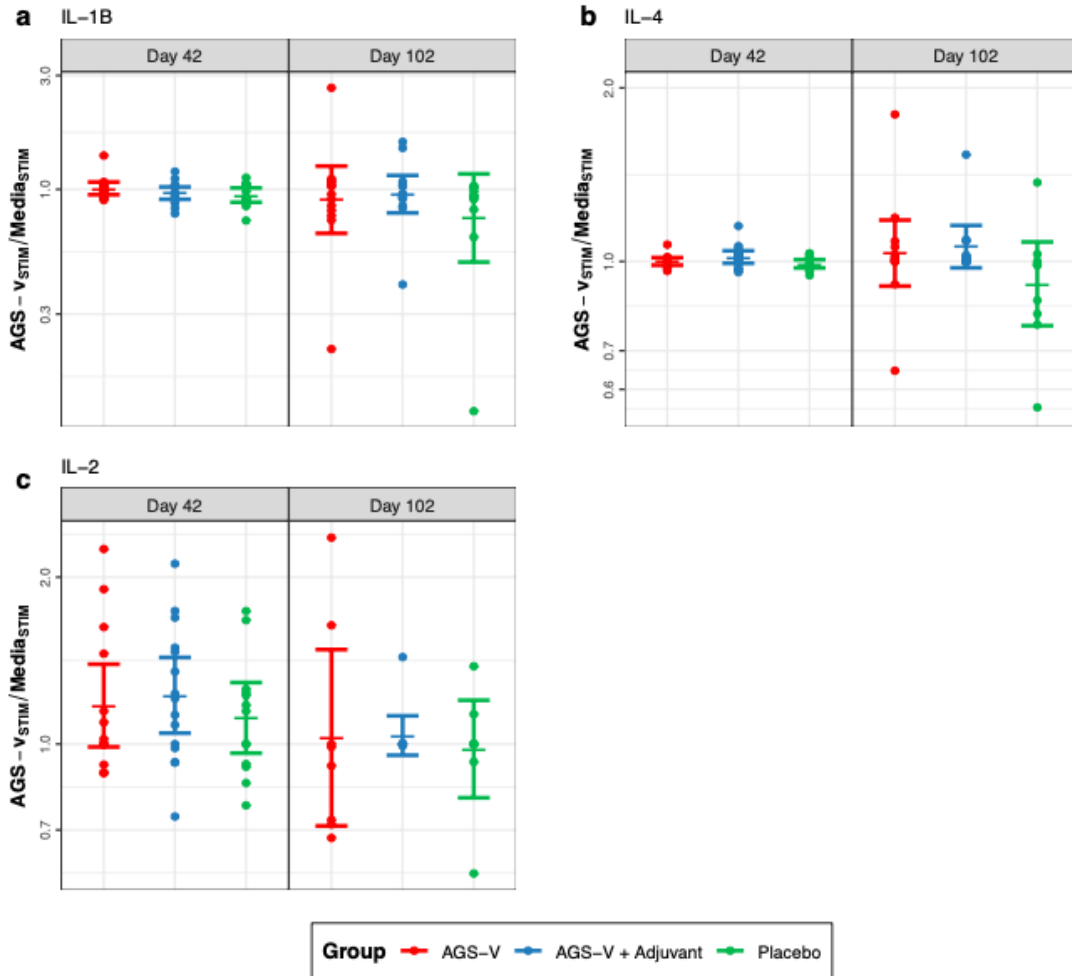

Supplementary Figure 3. Baseline and Follow-up Immunity to *Anopheles gambiae* and *Aedes aegypti* salivary gland homogenate is unchanged across all three groups.

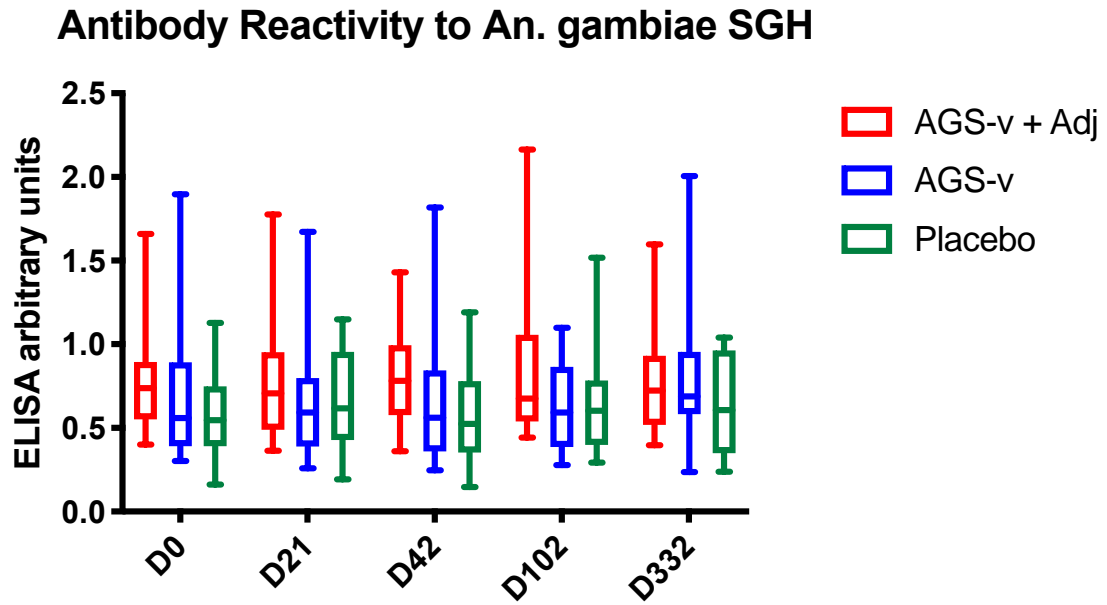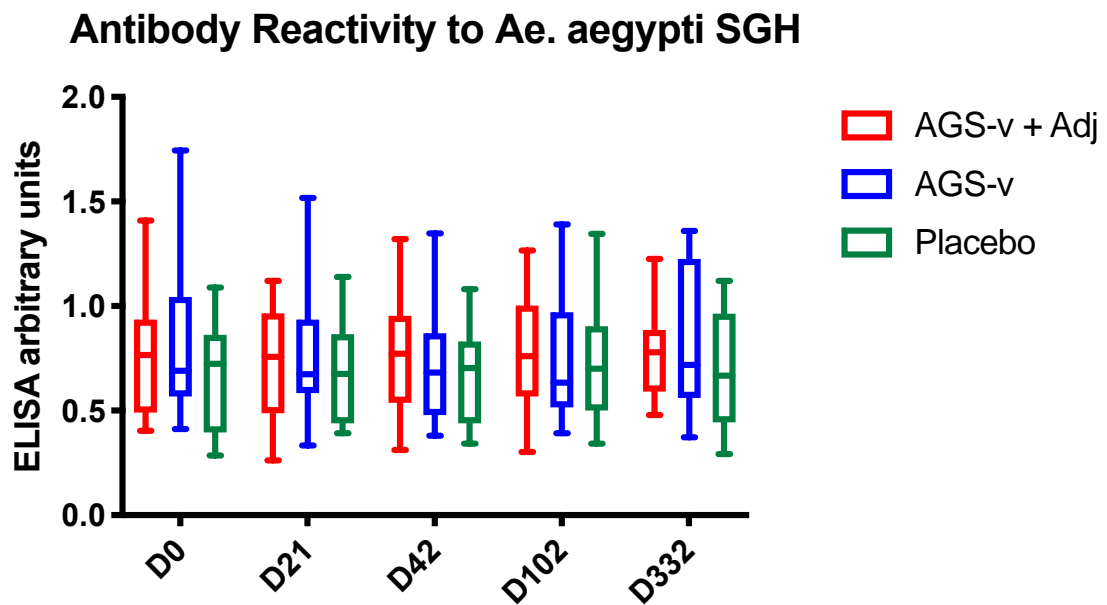

Supplement: NIHMS1605987-supplement-1.pdf [file NIHMS1605987-supplement-1.pdf]
